# Supplementary material for: Transcriptomic Analysis of Acetaminophen Biodegradation by Penicillium chrysogenum var. halophenolicum and Insights into Energy and Stress Response Pathways
Source: J Fungi (Basel). 2023 Mar 27;9(4):408. doi: 10.3390/jof9040408 (PMC10146002; doi:10.3390/jof9040408)
Supplement: Supplementary file 1 [file jof-09-00408-s001.zip › Suppl Table 1 PRJNA943349 STAR statistics alignment.xlsx]

## Sheet: Sheet1
	GLU24h_1	GLU24h_2	GLU24h_3	GLU48h_1	GLU48h_2	GLU48h_3	GLU72h_1	GLU72h_2	GLU72h_3	APAP24h_1	APAP24h_2	APAP24h_3	APAP48h_1	APAP48h_2	APAP48h_3	APAP72h_1	APAP72h_2	APAP72h_3	GLU-APAP24h_1	GLU-APAP24h_2	GLU-APAP24h_3	GLU-APAP48h_1	GLU-APAP48h_2	GLU-APAP48h_3	GLU-APAP72h_1	GLU-APAP72h_2	GLU-APAP72h_3
Number of input reads	48766392	49699348	47901055	12316920	32670540	44477821	39535098	42361980	37135030	45352153	39076959	42670415	41526269	42239414	37095072	41115304	48137543	46118733	27056087	41728259	50681686	40366242	41353432	38875482	19106572	29754566	13271591
Average input read length	150	150	150	150	150	150	150	150	150	150	150	150	150	150	150	150	150	150	150	150	150	150	150	150	150	150	150
UNIQUE READS:
Uniquely mapped reads number	43662153	44681185	43958326	9164586	28811015	40324420	35935988	38546958	33370820	39919553	34158211	38145525	35428452	33053202	32926698	29384383	37801253	38075093	21646770	36446890	46068077	34449712	35388728	34215402	14134930	26617555	11356803
Uniquely mapped reads %	0.8953	0.899	0.9177	0.7441	0.8819	0.9066	0.909	0.9099	0.8986	0.8802	0.8741	0.894	0.8532	0.7825	0.8876	0.7147	0.7853	0.8256	0.8001	0.8734	0.909	0.8534	0.8558	0.8801	0.7398	0.8946	0.8557
Average mapped length	149.21	149.2	149.25	149.12	149.16	149.16	149.24	149.27	149.22	149.2	149.18	149.21	149.23	149.23	149.27	149.18	149.21	149.28	149.12	149.13	149.23	149.22	149.26	149.24	149.16	149.18	149.13
Number of splices: Total	10411034	10221058	10153885	2050715	6098703	8580643	7411738	7788019	6844566	7741521	6570099	7406171	6907530	6433505	6553936	5582086	7570101	7757640	4817923	8550612	10901691	7722697	8081922	7895415	2973843	5763143	2378304
Number of splices: Annotated (sjdb)	10410750	10220842	10153668	2050511	6098519	8579565	7411115	7787387	6843817	7741302	6569854	7405426	6907369	6433000	6553774	5581895	7569537	7757414	4817522	8550224	10900805	7722345	8081713	7894443	2973376	5762732	2378131
Number of splices: GT/AG	10387621	10195624	10131035	2045455	6075240	8563701	7392862	7770507	6827130	7724223	6556838	7391833	6892462	6418517	6540475	5568711	7550905	7736992	4806404	8532882	10876544	7707189	8063204	7875685	2964844	5748451	2371119
Number of splices: GC/AG	14825	16750	14881	4178	18334	10950	13451	11626	12350	8656	6265	8173	9418	8586	8624	8113	13337	14258	7586	10988	13724	10223	13472	13620	6235	9426	4992
Number of splices: AT/AC	2587	501	356	77	272	321	260	836	408	475	184	271	383	157	348	257	467	332	229	379	3874	453	188	413	289	549	378
Number of splices: Non-canonical	6001	8183	7613	1005	4857	5671	5165	5050	4678	8167	6812	5894	5267	6245	4489	5005	5392	6058	3704	6363	7549	4832	5058	5697	2475	4717	1815
Mismatch rate per base, %	0.0036	0.0038	0.0036	0.0039	0.0037	0.0038	0.0033	0.0034	0.0033	0.0038	0.0039	0.0039	0.0039	0.0035	0.0036	0.0036	0.0035	0.0033	0.0039	0.004	0.0036	0.0034	0.0033	0.0033	0.0036	0.0036	0.0035
Deletion rate per base	0.0001	0.0001	0.0001	0.0001	0.0001	0.0001	0.0001	0.0001	0.0001	0.0001	0.0001	0.0001	0.0001	0.0001	0.0001	0.0001	0.0001	0.0001	0.0001	0.0001	0.0001	0.0001	0.0001	0.0001	0.0001	0.0001	0.0001
Deletion average length	1.5	1.49	1.49	1.44	1.47	1.49	1.5	1.49	1.44	1.56	1.6	1.6	1.53	1.53	1.54	1.47	1.45	1.47	1.53	1.5	1.5	1.47	1.47	1.45	1.4	1.43	1.43
Insertion rate per base	0	0	0	0	0	0	0	0	0	0	0	0	0	0	0	0	0	0	0	0	0	0	0	0	0	0	0
Insertion average length	1.29	1.29	1.3	1.27	1.29	1.29	1.29	1.32	1.33	1.31	1.32	1.29	1.35	1.3	1.32	1.32	1.32	1.33	1.32	1.31	1.32	1.32	1.29	1.31	1.32	1.32	1.31
MULTI-MAPPING READS:
Number of reads mapped to multiple loci	1264832	1574567	1635066	495900	1519185	1314323	1492872	1446127	1018473	1716897	1620050	1527882	4008230	4034616	2112953	8651652	7898404	5761332	809455	1288400	1601470	1310468	1211495	1422066	543613	897509	411057
% of reads mapped to multiple loci	0.0259	0.0317	0.0341	0.0403	0.0465	0.0296	0.0378	0.0341	0.0274	0.0379	0.0415	0.0358	0.0965	0.0955	0.057	0.2104	0.1641	0.1249	0.0299	0.0309	0.0316	0.0325	0.0293	0.0366	0.0285	0.0302	0.031
Number of reads mapped to too many loci	2734	2814	2726	517	2381	3147	2548	2444	2059	2147	1765	2290	1658	2019	1660	1783	2465	1592	1783	2594	2404	2262	2728	2512	1282	1932	1295
% of reads mapped to too many loci	0.0001	0.0001	0.0001	0	0.0001	0.0001	0.0001	0.0001	0.0001	0	0	0.0001	0	0	0	0	0.0001	0	0.0001	0.0001	0	0.0001	0.0001	0.0001	0.0001	0.0001	0.0001
UNMAPPED READS:
Number of reads unmapped: too many mismatches	0	0	0	0	0	0	0	0	0	0	0	0	0	0	0	0	0	0	0	0	0	0	0	0	0	0	0
% of reads unmapped: too many mismatches	0	0	0	0	0	0	0	0	0	0	0	0	0	0	0	0	0	0	0	0	0	0	0	0	0	0	0
Number of reads unmapped: too short	3835504	3439273	2295701	2650940	2333716	2833690	2102402	2365105	2742638	3468103	2881100	2993340	2086591	5148599	2052591	3076459	2432956	2279324	4597168	3883006	2823547	4565057	4747767	3105824	4424729	2235562	1501608
% of reads unmapped: too short	0.0787	0.0692	0.0479	0.2152	0.0714	0.0637	0.0532	0.0558	0.0739	0.0765	0.0737	0.0702	0.0502	0.1219	0.0553	0.0748	0.0505	0.0494	0.1699	0.0931	0.0557	0.1131	0.1148	0.0799	0.2316	0.0751	0.1131
Number of reads unmapped: other	1169	1509	9236	4977	4243	2241	1288	1346	1040	245453	415833	1378	1338	978	1170	1027	2465	1392	911	107369	186188	38743	2714	129678	2018	2008	828
% of reads unmapped: other	0	0	0.0002	0.0004	0.0001	0.0001	0	0	0	0.0054	0.0106	0	0	0	0	0	0.0001	0	0	0.0026	0.0037	0.001	0.0001	0.0033	0.0001	0.0001	0.0001
CHIMERIC READS:
Number of chimeric reads	85706	105876	125741	10118	66740	96326	87869	117311	69390	65098	43158	102357	60886	61500	54513	65698	98675	48951	63752	81580	61092	49250	62086	77951	24224	60405	30167
% of chimeric reads	0.0018	0.0021	0.0026	0.0008	0.002	0.0022	0.0022	0.0028	0.0019	0.0014	0.0011	0.0024	0.0015	0.0015	0.0015	0.0016	0.002	0.0011	0.0024	0.002	0.0012	0.0012	0.0015	0.002	0.0013	0.002	0.0023
