# Supplementary material for: Transcriptomic Analysis of Acetaminophen Biodegradation by Penicillium chrysogenum var. halophenolicum and Insights into Energy and Stress Response Pathways
Source: J Fungi (Basel). 2023 Mar 27;9(4):408. doi: 10.3390/jof9040408 (PMC10146002; doi:10.3390/jof9040408)
Supplement: Supplementary file 1 [file jof-09-00408-s001.zip › Suppl Table 2 PRJNA943349 Differentially expressed genes in ALL comparisons.xlsx]

## Sheet: APAP24h vs GLU24h
Gene	logFC	AveExpr	P.Value	adj.P.Val	Entry Name	Protein names	Length	Gene Ontology IDs	Gene Ontology (biological process)	Gene Ontology (cellular component)	Gene Ontology (molecular function)
EN45_084190	8.906	0.3069	2.283e-06	1.685e-05	A0A167UXZ1_PENCH	Ricin B-type lectin domain-containing protein	148
EN45_037770	8.861	1.431	5.066e-09	2.672e-07	A0A167Y5D6_PENCH	Chanoclavine-I aldehyde reductase	364	GO:0010181; GO:0016491			FMN binding [GO:0010181]; oxidoreductase activity [GO:0016491]
EN45_097010	8.705	2.531	7.57e-10	8.34e-08	A0A167R3J6_PENCH	Putative MFS-type transporter	533	GO:0016020; GO:0022857		membrane [GO:0016020]	transmembrane transporter activity [GO:0022857]
EN45_090430	8.271	-2.403	2.376e-07	3.329e-06	A0A167QKV1_PENCH	Bifunctional solanapyrone synthase	512	GO:0071704; GO:0071949	organic substance metabolic process [GO:0071704]		FAD binding [GO:0071949]
EN45_090440	8.237	-1.357	6.238e-07	6.643e-06	A0A162C0W0_PENCH	Short-chain dehydrogenase reductase 3c	297
EN45_042840	7.657	-1.394	1.209e-07	2.087e-06	A0A167YGL2_PENCH	Adhesive plaque matrix protein	202
EN45_056270	7.614	4.297	2.899e-11	1.125e-08	A0A167SEH3_PENCH	O-methylsterigmatocystin oxidoreductase	537	GO:0004497; GO:0005506; GO:0016705; GO:0020037; GO:0030639; GO:0043386; GO:1901336; GO:1901617	lactone biosynthetic process [GO:1901336]; mycotoxin biosynthetic process [GO:0043386]; organic hydroxy compound biosynthetic process [GO:1901617]; polyketide biosynthetic process [GO:0030639]		heme binding [GO:0020037]; iron ion binding [GO:0005506]; monooxygenase activity [GO:0004497]; oxidoreductase activity, acting on paired donors, with incorporation or reduction of molecular oxygen [GO:0016705]
EN45_001470	7.404	-2.303	1.233e-07	2.121e-06	A0A167V5X6_PENCH	LysM domain-containing protein	166
EN45_094770	7.278	8.925	6.346e-10	7.452e-08	A0A162C210_PENCH	Bifunctional pinoresinol-lariciresinol reductase	293	GO:0016491			oxidoreductase activity [GO:0016491]
EN45_001030	6.932	-0.8892	2.527e-06	1.827e-05	A0A167V4J5_PENCH	Putative 12-oxophytodienoate reductase	458	GO:0010181; GO:0016491			FMN binding [GO:0010181]; oxidoreductase activity [GO:0016491]
EN45_093710	6.736	7.488	4.717e-14	4.21e-10	A0A167QUL5_PENCH	DUF1993 domain-containing protein	170
EN45_051510	6.584	4.514	1.299e-08	4.748e-07	A0A167RZL7_PENCH	Secreted protein	111
EN45_114790	6.521	2.699	4.383e-08	1.056e-06	A0A167Q5T3_PENCH	Sugar transporter	527	GO:0008643; GO:0016020; GO:0022857	carbohydrate transport [GO:0008643]	membrane [GO:0016020]	transmembrane transporter activity [GO:0022857]
EN45_021350	6.496	4.477	7.04e-12	8.287e-09	A0A167WSB3_PENCH	beta-mannosidase (EC 3.2.1.25)	636	GO:0004553; GO:0005576; GO:0005975	carbohydrate metabolic process [GO:0005975]	extracellular region [GO:0005576]	hydrolase activity, hydrolyzing O-glycosyl compounds [GO:0004553]
EN45_027630	6.463	-0.7774	1.552e-05	7.415e-05	A0A167XAK4_PENCH	Alpha/beta hydrolase	451	GO:0017000; GO:0072330	antibiotic biosynthetic process [GO:0017000]; monocarboxylic acid biosynthetic process [GO:0072330]
EN45_046760	6.374	-1.942	3.782e-05	0.0001518	A0A167YSQ7_PENCH	Zn(2)-C6 fungal-type domain-containing protein	498	GO:0000981; GO:0003677; GO:0005634; GO:0008270		nucleus [GO:0005634]	DNA binding [GO:0003677]; DNA-binding transcription factor activity, RNA polymerase II-specific [GO:0000981]; zinc ion binding [GO:0008270]
EN45_064980	6.346	4.096	8.184e-10	8.694e-08	A0A167T6I6_PENCH	Peptide hydrolase (EC 3.4.-.-)	493	GO:0004177; GO:0006508; GO:0008235; GO:0046872	proteolysis [GO:0006508]		aminopeptidase activity [GO:0004177]; metal ion binding [GO:0046872]; metalloexopeptidase activity [GO:0008235]
EN45_026570	6.288	0.1163	2.662e-05	0.0001149	A0A167X7G7_PENCH	Putative transporter	391	GO:0016020; GO:0022857		membrane [GO:0016020]	transmembrane transporter activity [GO:0022857]
EN45_077120	6.263	-2.246	1.092e-05	5.635e-05	A0A167UBU4_PENCH	Putative nitrilase	241	GO:0006807	nitrogen compound metabolic process [GO:0006807]
EN45_023010	6.255	-0.6252	9.914e-05	0.0003334	A0A167WWY4_PENCH	DUF4158 domain-containing protein	138
EN45_031750	6.079	7.097	2.102e-13	9.38e-10	A0A161ZKU3_PENCH	Zinc-type alcohol dehydrogenase-like protein	347	GO:0016491			oxidoreductase activity [GO:0016491]
EN45_043500	5.986	-2.124	4.192e-05	0.0001654	A0A167YIC8_PENCH	Uncharacterized protein	174
EN45_053100	5.981	-0.3769	7.234e-05	0.0002571	A0A167S4F6_PENCH	Putative acyl-CoA dehydrogenase	161
EN45_045030	5.932	-2.1	2.091e-06	1.575e-05	A0A161ZNQ0_PENCH	Putative 4-coumarate-CoA ligase	541	GO:0016874			ligase activity [GO:0016874]
EN45_110090	5.925	-1.753	1.116e-05	5.722e-05	A0A167PVU4_PENCH	Adhesin	194
EN45_005810	5.909	2.07	1.724e-05	8.054e-05	A0A169X5N0_PENCH	INVERT_DEFENSINS domain-containing protein	71	GO:0006952	defense response [GO:0006952]
EN45_025080	5.809	-1.611	1.383e-05	6.758e-05	A0A167X329_PENCH	HEPN domain-containing protein	139
EN45_010050	5.808	0.7929	6.905e-08	1.407e-06	A0A167VTM9_PENCH	Peroxidase	537	GO:0004601; GO:0020037			heme binding [GO:0020037]; peroxidase activity [GO:0004601]
EN45_081570	5.686	0.7735	1.243e-05	6.223e-05	A0A167URD0_PENCH	Apple domain-containing protein	426
EN45_025060	5.669	-0.1605	1.802e-05	8.357e-05	A0A167X307_PENCH	Ribonuclease	144	GO:0004525; GO:0006396	RNA processing [GO:0006396]		ribonuclease III activity [GO:0004525]
EN45_026560	5.63	1.36	9.072e-08	1.704e-06	A0A167X7F9_PENCH	Fumarylacetoacetate hydrolase domain-containing protein 2-like protein	305	GO:0016787			hydrolase activity [GO:0016787]
EN45_109710	5.57	0.9105	2.264e-07	3.228e-06	A0A162CN05_PENCH	GPI ethanolamine phosphate transferase 2	785	GO:0005789; GO:0006506; GO:0051377	GPI anchor biosynthetic process [GO:0006506]	endoplasmic reticulum membrane [GO:0005789]	mannose-ethanolamine phosphotransferase activity [GO:0051377]
EN45_002170	5.569	1.988	3.907e-08	9.793e-07	A0A167V7I3_PENCH	Zinc finger protein	297	GO:0005634		nucleus [GO:0005634]
EN45_113560	5.51	-1.361	9.622e-05	0.0003255	A0A161Z4F1_PENCH	Protein kinase domain-containing protein	740	GO:0004672; GO:0005524; GO:0006468	protein phosphorylation [GO:0006468]		ATP binding [GO:0005524]; protein kinase activity [GO:0004672]
EN45_090420	5.454	-1.423	3.865e-05	0.0001544	A0A167QKS4_PENCH	Aristolochene synthase	359
EN45_027690	5.444	4.545	6.925e-11	1.818e-08	A0A167XAS9_PENCH	Putative dipeptidyl-peptidase	772	GO:0006508; GO:0008236; GO:0016020; GO:0017000; GO:0072330	antibiotic biosynthetic process [GO:0017000]; monocarboxylic acid biosynthetic process [GO:0072330]; proteolysis [GO:0006508]	membrane [GO:0016020]	serine-type peptidase activity [GO:0008236]
EN45_012380	5.429	-0.1043	2.197e-06	1.635e-05	A0A167W087_PENCH	Uncharacterized protein	273
EN45_005290	5.422	4.937	1.336e-11	8.287e-09	A0A169X2V7_PENCH	Extradiol ring-cleavage dioxygenase	369	GO:0006725; GO:0008198; GO:0008270; GO:0016020; GO:0016701; GO:0051213	cellular aromatic compound metabolic process [GO:0006725]	membrane [GO:0016020]	dioxygenase activity [GO:0051213]; ferrous iron binding [GO:0008198]; oxidoreductase activity, acting on single donors with incorporation of molecular oxygen [GO:0016701]; zinc ion binding [GO:0008270]
EN45_041860	5.348	0.8206	1.012e-06	9.351e-06	A0A167YDY1_PENCH	Uncharacterized protein	175
EN45_058950	5.268	7.925	5.042e-13	1.5e-09	A0A167SLX7_PENCH	Dopa 4,5-dioxygenase	173
EN45_028270	5.258	5.997	1.971e-11	9.77e-09	A0A161ZJX6_PENCH	Uncharacterized protein in dcmA 3'region	296	GO:0016491			oxidoreductase activity [GO:0016491]
EN45_113290	5.235	5.611	5.134e-09	2.672e-07	A0A162BEM7_PENCH	Small secreted protein	97
EN45_075450	5.227	6.008	2.601e-07	3.553e-06	A0A167U5W7_PENCH	Bubble protein	88
EN45_056810	5.101	7.075	1.534e-11	8.287e-09	A0A167SFX1_PENCH	Aflatoxin B1 aldehyde reductase member	323	GO:0016491			oxidoreductase activity [GO:0016491]
EN45_066780	5.078	-0.1415	4.236e-06	2.702e-05	A0A167TC13_PENCH	Uncharacterized protein	144
EN45_023590	5.003	-0.6844	0.0006975	0.001674	A0A167WYI4_PENCH	Putative oxidoreductase	285	GO:0016491			oxidoreductase activity [GO:0016491]
EN45_049820	4.965	3.294	1.183e-08	4.474e-07	A0A167RUE9_PENCH	Sodium transport ATPase	1082	GO:0005524; GO:0016020; GO:0016887; GO:0019829		membrane [GO:0016020]	ATP binding [GO:0005524]; ATP hydrolysis activity [GO:0016887]; ATPase-coupled cation transmembrane transporter activity [GO:0019829]
EN45_115160	4.907	6.938	5.146e-10	6.655e-08	A0A167Q6L8_PENCH	Sugar transporter	542	GO:0008643; GO:0016020; GO:0022857	carbohydrate transport [GO:0008643]	membrane [GO:0016020]	transmembrane transporter activity [GO:0022857]
EN45_006410	4.86	3.36	1.108e-07	1.961e-06	A0A167VGK1_PENCH	CFEM domain-containing protein	134
EN45_111640	4.86	-1.566	1.282e-05	6.362e-05	A0A161Z3W9_PENCH	TPR_REGION domain-containing protein	392
EN45_105260	4.836	5.195	2.43e-11	1.032e-08	A0A162CM22_PENCH	Lipase	307	GO:0006629; GO:0017000; GO:0072330	antibiotic biosynthetic process [GO:0017000]; lipid metabolic process [GO:0006629]; monocarboxylic acid biosynthetic process [GO:0072330]
EN45_065000	4.815	3.395	1.76e-08	5.818e-07	A0A167T6K3_PENCH	Peptidase M20 domain-containing protein 2	411	GO:0005576; GO:0006508; GO:0016805	proteolysis [GO:0006508]	extracellular region [GO:0005576]	dipeptidase activity [GO:0016805]
EN45_022290	4.734	1.919	5.992e-06	3.518e-05	A0A167WUY2_PENCH	RanBD1 domain-containing protein	293
EN45_046560	4.711	0.9244	3.646e-05	0.0001479	A0A167YS74_PENCH	N amino acid transport system protein	477	GO:0016020		membrane [GO:0016020]
EN45_023730	4.708	7.505	1.19e-09	1.073e-07	A0A167WZ01_PENCH	AA1-like domain-containing protein	114
EN45_065010	4.703	7.076	1.579e-11	8.287e-09	A0A167T6L9_PENCH	amidase (EC 3.5.1.4)	538	GO:0004040; GO:0043864			amidase activity [GO:0004040]; indoleacetamide hydrolase activity [GO:0043864]
EN45_039400	4.697	2.384	1.035e-08	4.086e-07	A0A167YA72_PENCH	Putative transporter YgaY	489	GO:0016020; GO:0022857		membrane [GO:0016020]	transmembrane transporter activity [GO:0022857]
EN45_045930	4.697	4.253	1.4e-08	4.918e-07	A0A167YQA4_PENCH	Neutral protease 2 (EC 3.4.24.39) (Deuterolysin)	350	GO:0004222; GO:0005576; GO:0006508; GO:0046872	proteolysis [GO:0006508]	extracellular region [GO:0005576]	metal ion binding [GO:0046872]; metalloendopeptidase activity [GO:0004222]
EN45_103270	4.685	-1.477	2.075e-05	9.373e-05	A0A162CSY8_PENCH	Killer toxin subunits alpha/beta	359	GO:0008061			chitin binding [GO:0008061]
EN45_001460	4.682	4.399	1.008e-07	1.848e-06	A0A161ZDP1_PENCH	chitinase (EC 3.2.1.14)	1077	GO:0000272; GO:0004568; GO:0005576; GO:0006032; GO:0008061	chitin catabolic process [GO:0006032]; polysaccharide catabolic process [GO:0000272]	extracellular region [GO:0005576]	chitin binding [GO:0008061]; chitinase activity [GO:0004568]
EN45_050080	4.665	2.326	5.876e-09	2.804e-07	A0A167RV47_PENCH	ANK_REP_REGION domain-containing protein	580
EN45_059000	4.653	6.332	2.267e-10	3.935e-08	A0A167SM19_PENCH	Glutaminase A	687	GO:0005975	carbohydrate metabolic process [GO:0005975]
EN45_039790	4.65	4.775	4.572e-10	6.581e-08	A0A167YB86_PENCH	Mannan endo-1,6-alpha-mannosidase (EC 3.2.1.101)	472	GO:0008496; GO:0016020; GO:0016052	carbohydrate catabolic process [GO:0016052]	membrane [GO:0016020]	mannan endo-1,6-alpha-mannosidase activity [GO:0008496]
EN45_049180	4.643	2.8	1.393e-08	4.914e-07	A0A167RSR6_PENCH	Putative transporter	532	GO:0016020; GO:0022857		membrane [GO:0016020]	transmembrane transporter activity [GO:0022857]
EN45_082020	4.633	3.91	1.877e-08	6.048e-07	A0A167USG7_PENCH	TACC_C domain-containing protein	858
EN45_080130	4.63	4.51	6.893e-08	1.407e-06	A0A167UM30_PENCH	Similar to	309
EN45_085460	4.587	-0.0111	2.592e-05	0.0001126	A0A167Q738_PENCH	Putative NADPH dehydrogenase	413	GO:0003959; GO:0010181; GO:0050661			FMN binding [GO:0010181]; NADP binding [GO:0050661]; NADPH dehydrogenase activity [GO:0003959]
EN45_033180	4.571	9.93	4.775e-10	6.634e-08	A0A167XS66_PENCH	chitinase (EC 3.2.1.14)	399	GO:0000272; GO:0004568; GO:0005576; GO:0006032; GO:0008061	chitin catabolic process [GO:0006032]; polysaccharide catabolic process [GO:0000272]	extracellular region [GO:0005576]	chitin binding [GO:0008061]; chitinase activity [GO:0004568]
EN45_038700	4.543	3.772	2.847e-09	1.9e-07	A0A167Y8A3_PENCH	Putative glycosyl hydrolase	745	GO:0000272; GO:0004553; GO:0005576; GO:0016042; GO:1901136	carbohydrate derivative catabolic process [GO:1901136]; lipid catabolic process [GO:0016042]; polysaccharide catabolic process [GO:0000272]	extracellular region [GO:0005576]	hydrolase activity, hydrolyzing O-glycosyl compounds [GO:0004553]
EN45_055220	4.534	4.036	1.181e-08	4.474e-07	A0A167SAT7_PENCH	Sm domain-containing protein	141
EN45_025680	4.515	2.606	8.681e-09	3.638e-07	A0A167X4Q6_PENCH	GRIP domain-containing protein	544
EN45_099000	4.491	2.528	2.742e-08	7.799e-07	A0A167R947_PENCH	alkaline phosphatase (EC 3.1.3.1)	660	GO:0004035			alkaline phosphatase activity [GO:0004035]
EN45_077420	4.435	5.751	3.692e-11	1.373e-08	A0A167UCY6_PENCH	Protein kinase domain-containing protein	404
EN45_069770	4.434	4.547	2.587e-09	1.847e-07	A0A167TLH1_PENCH	F-box domain-containing protein	314
EN45_100130	4.432	-0.4683	0.001646	0.003511	A0A167RCE8_PENCH	Fumonisin B1 esterase	550	GO:0017000; GO:0072330	antibiotic biosynthetic process [GO:0017000]; monocarboxylic acid biosynthetic process [GO:0072330]
EN45_006250	4.409	3.696	1.608e-07	2.531e-06	A0A169X7M1_PENCH	Lectin_legB domain-containing protein	246
EN45_103640	4.367	3.737	5.71e-06	3.399e-05	A0A167RLW5_PENCH	chitinase (EC 3.2.1.14)	427	GO:0000272; GO:0004568; GO:0005576; GO:0006032; GO:0008061	chitin catabolic process [GO:0006032]; polysaccharide catabolic process [GO:0000272]	extracellular region [GO:0005576]	chitin binding [GO:0008061]; chitinase activity [GO:0004568]
EN45_112120	4.361	-0.7483	0.001647	0.003511	A0A167Q026_PENCH	Linear gramicidin synthase subunit D	945
EN45_056250	4.341	6.012	1.364e-11	8.287e-09	A0A167SEF6_PENCH	Zinc finger protein	725	GO:0000981; GO:0003677; GO:0005634; GO:0008270		nucleus [GO:0005634]	DNA binding [GO:0003677]; DNA-binding transcription factor activity, RNA polymerase II-specific [GO:0000981]; zinc ion binding [GO:0008270]
EN45_082030	4.333	2.818	9.964e-09	3.987e-07	A0A167USJ6_PENCH	Putative alpha-ketoglutarate-dependent sulfonate dioxygenase	400	GO:0051213			dioxygenase activity [GO:0051213]
EN45_071130	4.315	0.1277	2.604e-05	0.0001129	A0A167TRC5_PENCH	Ferric reductase transmembrane component	375	GO:0016020; GO:0016491		membrane [GO:0016020]	oxidoreductase activity [GO:0016491]
EN45_011420	4.307	2.058	1.54e-07	2.46e-06	A0A167VXJ9_PENCH	Serine/threonine-protein kinase SRPK	388	GO:0004672; GO:0005524; GO:0006468	protein phosphorylation [GO:0006468]		ATP binding [GO:0005524]; protein kinase activity [GO:0004672]
EN45_057720	4.307	3.768	1.87e-06	1.459e-05	A0A167SIB3_PENCH	Putative quinate permease	547	GO:0016020; GO:0022857		membrane [GO:0016020]	transmembrane transporter activity [GO:0022857]
EN45_050040	4.282	2.349	1.327e-07	2.217e-06	A0A167RUZ9_PENCH	Delta(24(24(1)))-sterol reductase	922	GO:0004497; GO:0005506; GO:0016020; GO:0016126; GO:0016628; GO:0016705; GO:0020037; GO:0030639; GO:0043386; GO:1901336	lactone biosynthetic process [GO:1901336]; mycotoxin biosynthetic process [GO:0043386]; polyketide biosynthetic process [GO:0030639]; sterol biosynthetic process [GO:0016126]	membrane [GO:0016020]	heme binding [GO:0020037]; iron ion binding [GO:0005506]; monooxygenase activity [GO:0004497]; oxidoreductase activity, acting on paired donors, with incorporation or reduction of molecular oxygen [GO:0016705]; oxidoreductase activity, acting on the CH-CH group of donors, NAD or NADP as acceptor [GO:0016628]
EN45_068300	4.273	0.8156	2.242e-06	1.659e-05	A0A167TGU2_PENCH	Hva1_TUDOR domain-containing protein	75
EN45_049830	4.266	1.947	5.532e-08	1.247e-06	A0A167RUF5_PENCH	RING-type domain-containing protein	184	GO:0006511; GO:0008270; GO:0016020; GO:0016567	protein ubiquitination [GO:0016567]; ubiquitin-dependent protein catabolic process [GO:0006511]	membrane [GO:0016020]	zinc ion binding [GO:0008270]
EN45_012440	4.264	6.109	1.295e-11	8.287e-09	A0A167W0F8_PENCH	ABC transporter G family member	1480	GO:0005524; GO:0005886; GO:0140359		plasma membrane [GO:0005886]	ABC-type transporter activity [GO:0140359]; ATP binding [GO:0005524]
EN45_066560	4.258	5.384	1.025e-10	2.287e-08	A0A167TBA2_PENCH	TPR_REGION domain-containing protein	453
EN45_015550	4.256	6.673	1.862e-10	3.42e-08	A0A167WA05_PENCH	Glucosamine-6-phosphate isomerase (EC 3.5.99.6) (Glucosamine-6-phosphate deaminase)	290	GO:0004342; GO:0005634; GO:0005975; GO:0006044	carbohydrate metabolic process [GO:0005975]; N-acetylglucosamine metabolic process [GO:0006044]	nucleus [GO:0005634]	glucosamine-6-phosphate deaminase activity [GO:0004342]
EN45_026410	4.238	1.999	3.593e-07	4.51e-06	A0A167X706_PENCH	SirQ	388
EN45_112790	4.206	-1.292	3.342e-05	0.0001382	A0A167Q1B3_PENCH	Sphingoid long-chain base transporter	265	GO:0016020		membrane [GO:0016020]
EN45_109240	4.205	0.2706	0.0003475	0.0009408	A0A161Z378_PENCH	Glucose oxidase	558	GO:0016614; GO:0050660			flavin adenine dinucleotide binding [GO:0050660]; oxidoreductase activity, acting on CH-OH group of donors [GO:0016614]
EN45_039760	4.201	2.18	3.852e-08	9.712e-07	A0A167YB54_PENCH	Integral membrane protein	231	GO:0016020		membrane [GO:0016020]
EN45_021930	4.196	6.757	6.886e-08	1.407e-06	A0A161ZIG7_PENCH	Phosphatidate phosphatase	413	GO:0008195			phosphatidate phosphatase activity [GO:0008195]
EN45_101940	4.195	0.1194	5.092e-05	0.0001936	A0A167RHQ8_PENCH	GPI-anchored protein	328	GO:0016020		membrane [GO:0016020]
EN45_016290	4.193	2.45	1.007e-06	9.313e-06	A0A167WCK1_PENCH	Mutanase	636	GO:0051118			glucan endo-1,3-alpha-glucosidase activity [GO:0051118]
EN45_060460	4.169	0.2008	2.196e-05	9.799e-05	A0A167SRY5_PENCH	NmrA domain-containing protein	190
EN45_062080	4.166	-0.02209	1.575e-05	7.5e-05	A0A167SXB1_PENCH	Gag_pre-integrs domain-containing protein	225
EN45_000400	4.159	2.509	2.222e-08	6.745e-07	A0A167V2D2_PENCH	Putative HC-toxin efflux carrier	536	GO:0016020; GO:0022857		membrane [GO:0016020]	transmembrane transporter activity [GO:0022857]
EN45_021730	4.154	5.157	3.89e-11	1.388e-08	A0A167WTF4_PENCH	AB hydrolase-1 domain-containing protein	252	GO:0017000; GO:0072330	antibiotic biosynthetic process [GO:0017000]; monocarboxylic acid biosynthetic process [GO:0072330]
EN45_112800	4.104	3.492	6.863e-08	1.407e-06	A0A167Q1B7_PENCH	Ricin B-type lectin domain-containing protein	167
EN45_053080	4.058	0.2714	1.109e-06	9.993e-06	A0A167S4F2_PENCH	Linear gramicidin synthase subunit D	1032	GO:0018130; GO:0031177; GO:0044283; GO:0044550; GO:1901362	heterocycle biosynthetic process [GO:0018130]; organic cyclic compound biosynthetic process [GO:1901362]; secondary metabolite biosynthetic process [GO:0044550]; small molecule biosynthetic process [GO:0044283]		phosphopantetheine binding [GO:0031177]
EN45_112250	4.028	-0.5817	1.93e-05	8.848e-05	A0A167Q086_PENCH	SCP domain-containing protein	340
EN45_075460	4.021	5.297	8.075e-11	1.896e-08	A0A167U5X7_PENCH	Putative drug/proton antiporter	509	GO:0016020; GO:0022857		membrane [GO:0016020]	transmembrane transporter activity [GO:0022857]
EN45_064990	4.02	2.832	1.629e-08	5.506e-07	A0A167T6J6_PENCH	Putative transporter	269	GO:0016020; GO:0022857		membrane [GO:0016020]	transmembrane transporter activity [GO:0022857]
EN45_103800	4.01	1.878	2.256e-06	1.668e-05	A0A167RM93_PENCH	Tryptophan synthase	518
EN45_021680	4.008	-0.6825	1.012e-05	5.325e-05	A0A167WTB8_PENCH	Putative oxidoreductase	374	GO:0016491			oxidoreductase activity [GO:0016491]
EN45_023000	3.994	4.145	5.39e-07	6.02e-06	A0A167WWX4_PENCH	Putative N-acetyltransferase	241	GO:0016407			acetyltransferase activity [GO:0016407]
EN45_072870	3.981	7.341	1.071e-12	2.389e-09	A0A167TX47_PENCH	Glutathione S-transferase omega-1	236	GO:0016740			transferase activity [GO:0016740]
EN45_094760	3.981	3.611	5.086e-07	5.745e-06	A0A167QXD2_PENCH	RING-type domain-containing protein	306	GO:0004842; GO:0046872			metal ion binding [GO:0046872]; ubiquitin-protein transferase activity [GO:0004842]
EN45_023030	3.966	0.3412	1.103e-05	5.668e-05	A0A167WWZ4_PENCH	Epiglycanin_C domain-containing protein	545
EN45_106380	3.954	1.625	4.481e-06	2.816e-05	A0A162BD48_PENCH	Putative rhamnogalacturonate lyase C	305	GO:0016787; GO:0016829			hydrolase activity [GO:0016787]; lyase activity [GO:0016829]
EN45_102710	3.942	-0.7273	2.461e-05	0.000108	A0A167RJJ4_PENCH	Protein NLRC3	490
EN45_095660	3.939	2.851	1.283e-07	2.177e-06	A0A167QZW4_PENCH	Aminotran_1_2 domain-containing protein	439	GO:0003824; GO:0009058; GO:0030170	biosynthetic process [GO:0009058]		catalytic activity [GO:0003824]; pyridoxal phosphate binding [GO:0030170]
EN45_003720	3.938	5.588	3.935e-08	9.838e-07	A0A167VBL3_PENCH	Carboxyvinyl-carboxyphosphonate phosphorylmutase	326	GO:0016829			lyase activity [GO:0016829]
EN45_040310	3.937	7.831	3.385e-08	8.905e-07	A0A167YCJ3_PENCH	endo-1,3(4)-beta-glucanase (EC 3.2.1.6)	895	GO:0008152; GO:0008422; GO:0052861; GO:0052862	metabolic process [GO:0008152]		beta-glucosidase activity [GO:0008422]; glucan endo-1,3-beta-glucanase activity, C-3 substituted reducing group [GO:0052861]; glucan endo-1,4-beta-glucanase activity, C-3 substituted reducing group [GO:0052862]
EN45_015800	3.911	6.859	5.521e-10	6.98e-08	A0A167WB50_PENCH	Sugar transporter	553	GO:0008643; GO:0016020; GO:0022857	carbohydrate transport [GO:0008643]	membrane [GO:0016020]	transmembrane transporter activity [GO:0022857]
EN45_050740	3.877	-0.2916	0.0007599	0.0018	A0A161XVF1_PENCH	Glycosidase (EC 3.2.-.-)	367	GO:0004553; GO:0005886; GO:0005975; GO:0071555	carbohydrate metabolic process [GO:0005975]; cell wall organization [GO:0071555]	plasma membrane [GO:0005886]	hydrolase activity, hydrolyzing O-glycosyl compounds [GO:0004553]
EN45_039840	3.876	5.007	2.372e-10	3.994e-08	A0A167YBC7_PENCH	MFS domain-containing protein	467	GO:0016020; GO:0022857		membrane [GO:0016020]	transmembrane transporter activity [GO:0022857]
EN45_000290	3.873	0.09822	1.061e-05	5.521e-05	A0A167V234_PENCH	Sulfatase domain-containing protein	99
EN45_110590	3.858	2.943	1.57e-07	2.498e-06	A0A167PWR7_PENCH	Protein kinase domain-containing protein	524
EN45_108060	3.857	2.004	1.044e-06	9.563e-06	A0A162CMM7_PENCH	Putative MFS-type transporter	762	GO:0006807; GO:0016020; GO:0022857	nitrogen compound metabolic process [GO:0006807]	membrane [GO:0016020]	transmembrane transporter activity [GO:0022857]
EN45_086500	3.838	5.858	1.058e-10	2.302e-08	A0A167QA72_PENCH	Extracellular endo-alpha-(1-5)-L-arabinanase	331	GO:0004553; GO:0005975	carbohydrate metabolic process [GO:0005975]		hydrolase activity, hydrolyzing O-glycosyl compounds [GO:0004553]
EN45_053170	3.836	-0.8326	0.004952	0.009139	A0A167S4J2_PENCH	Lactam utilization protein	255	GO:0005975	carbohydrate metabolic process [GO:0005975]
EN45_069590	3.834	6.839	5.137e-11	1.584e-08	A0A167TKX5_PENCH	Putative quinone oxidoreductase	383	GO:0008270; GO:0016491			oxidoreductase activity [GO:0016491]; zinc ion binding [GO:0008270]
EN45_007440	3.826	2.809	3.899e-08	9.793e-07	A0A167VKC7_PENCH	Sterol uptake control protein	384	GO:0000981; GO:0003677; GO:0005634; GO:0008270; GO:0045944	positive regulation of transcription by RNA polymerase II [GO:0045944]	nucleus [GO:0005634]	DNA binding [GO:0003677]; DNA-binding transcription factor activity, RNA polymerase II-specific [GO:0000981]; zinc ion binding [GO:0008270]
EN45_045830	3.817	2.955	8.298e-07	8.111e-06	A0A167YQ14_PENCH	Adenosine deaminase CECR1-A	590	GO:0019239			deaminase activity [GO:0019239]
EN45_110570	3.817	1.805	7.075e-07	7.274e-06	A0A162BE16_PENCH	Glucose oxidase	1080	GO:0016614; GO:0050660			flavin adenine dinucleotide binding [GO:0050660]; oxidoreductase activity, acting on CH-OH group of donors [GO:0016614]
EN45_052170	3.788	1.135	2.237e-06	1.657e-05	A0A167S1K3_PENCH	Oligopeptide transporter	496	GO:0016020		membrane [GO:0016020]
EN45_014480	3.78	4.014	6.113e-07	6.557e-06	A0A167W6K9_PENCH	Secreted protein	158
EN45_079970	3.778	-0.4181	3.218e-05	0.0001342	A0A167ULN8_PENCH	Hydrophobin	146	GO:0005199; GO:0005576; GO:0009277		extracellular region [GO:0005576]; fungal-type cell wall [GO:0009277]	structural constituent of cell wall [GO:0005199]
EN45_077080	3.772	-0.02186	1.267e-05	6.301e-05	A0A167UBM0_PENCH	Putative glycosidase	370	GO:0004553; GO:0005886; GO:0005975	carbohydrate metabolic process [GO:0005975]	plasma membrane [GO:0005886]	hydrolase activity, hydrolyzing O-glycosyl compounds [GO:0004553]
EN45_039730	3.765	1.554	1.222e-06	1.065e-05	A0A161ZML4_PENCH	Regulatory protein PcAbaA	795	GO:0003700; GO:0005634; GO:0048315	conidium formation [GO:0048315]	nucleus [GO:0005634]	DNA-binding transcription factor activity [GO:0003700]
EN45_029090	3.763	6.198	1.507e-11	8.287e-09	A0A167XF29_PENCH	Phenol 2-monooxygenase	678	GO:0004497; GO:0044550; GO:0071949	secondary metabolite biosynthetic process [GO:0044550]		FAD binding [GO:0071949]; monooxygenase activity [GO:0004497]
EN45_085880	3.746	0.5959	4.595e-06	2.869e-05	A0A162CPB2_PENCH	Citrate synthase	328	GO:0046912			acyltransferase activity, acyl groups converted into alkyl on transfer [GO:0046912]
EN45_093690	3.738	0.8239	7.544e-07	7.565e-06	A0A167QUK5_PENCH	Putative peroxisomal-coenzyme A synthetase	1677	GO:0004475; GO:0016020; GO:0031177		membrane [GO:0016020]	mannose-1-phosphate guanylyltransferase (GTP) activity [GO:0004475]; phosphopantetheine binding [GO:0031177]
EN45_016740	3.72	1.547	1.557e-05	7.432e-05	A0A167WDY7_PENCH	Putative transporter	392	GO:0016020		membrane [GO:0016020]
EN45_092070	3.717	4.506	5.802e-10	7.092e-08	A0A167QQC7_PENCH	Uncharacterized protein	95
EN45_092010	3.714	0.08017	2.754e-05	0.0001181	A0A162C163_PENCH	Uncharacterized protein	176	GO:0016020		membrane [GO:0016020]
EN45_094690	3.68	2.292	7.235e-07	7.379e-06	A0A167QX76_PENCH	Putative transporter	539	GO:0016020; GO:0022857		membrane [GO:0016020]	transmembrane transporter activity [GO:0022857]
EN45_113420	3.635	1.905	4.912e-08	1.142e-06	A0A167Q2X0_PENCH	SET domain-containing protein	568
EN45_058960	3.634	9.745	1.809e-08	5.935e-07	A0A167SLZ2_PENCH	Putative vacuolar protein sorting-associated protein	320
EN45_035160	3.627	1.564	1.544e-05	7.383e-05	A0A167XY26_PENCH	Cyanovirin-N-like protein	109
EN45_018120	3.617	4.878	5.149e-11	1.584e-08	A0A167WHY0_PENCH	TNT domain-containing protein	244	GO:0061810			NAD glycohydrolase activity [GO:0061810]
EN45_021740	3.588	9.914	6.995e-09	3.137e-07	A0A167WTG4_PENCH	Glucan endo-1,3-beta-glucosidase	426
EN45_011390	3.576	0.02754	0.0001035	0.0003458	A0A167VXI5_PENCH	Inhibitor I9 domain-containing protein	75
EN45_012370	3.574	5.187	4.648e-09	2.529e-07	A0A167W078_PENCH	Pollen-specific leucine-rich repeat extensin-like protein 1	270
EN45_058450	3.522	1.099	1.155e-06	1.023e-05	A0A167SKC9_PENCH	DUF541 domain-containing protein	232
EN45_072680	3.501	3.583	1.31e-08	4.748e-07	A0A167TWH6_PENCH	Uncharacterized protein	184
EN45_008230	3.5	0.6396	2.887e-05	0.0001228	A0A167VMX5_PENCH	Norsolorinic acid ketoreductase	248
EN45_000050	3.499	2.827	1.217e-06	1.063e-05	A0A167V1E7_PENCH	Putative formate transporter	312	GO:0016020; GO:0022857		membrane [GO:0016020]	transmembrane transporter activity [GO:0022857]
EN45_016270	3.491	-0.5485	0.001759	0.003713	A0A167WCI4_PENCH	Cytochrome b2	488	GO:0016491; GO:0020037; GO:0046872			heme binding [GO:0020037]; metal ion binding [GO:0046872]; oxidoreductase activity [GO:0016491]
EN45_082350	3.49	0.9799	4.962e-06	3.047e-05	A0A167UTE3_PENCH	Sporulation-specific protein	601	GO:0003723			RNA binding [GO:0003723]
EN45_105360	3.483	4.898	6.967e-09	3.137e-07	A0A162CM26_PENCH	ABC multidrug transporter	1440	GO:0005524; GO:0016020; GO:0140359		membrane [GO:0016020]	ABC-type transporter activity [GO:0140359]; ATP binding [GO:0005524]
EN45_050860	3.482	5.888	1.643e-07	2.571e-06	A0A167RXN8_PENCH	Arrestin_N domain-containing protein	589
EN45_035520	3.479	7.443	2.761e-07	3.7e-06	A0A167XZ20_PENCH	alpha-1,2-Mannosidase (EC 3.2.1.-)	510	GO:0004571; GO:0005509; GO:0005975; GO:0006486; GO:0016020; GO:0030433	carbohydrate metabolic process [GO:0005975]; protein glycosylation [GO:0006486]; ubiquitin-dependent ERAD pathway [GO:0030433]	membrane [GO:0016020]	calcium ion binding [GO:0005509]; mannosyl-oligosaccharide 1,2-alpha-mannosidase activity [GO:0004571]
EN45_103350	3.465	0.1676	5.29e-06	3.207e-05	A0A167RL75_PENCH	Putative secreted protein	197
EN45_030890	3.441	2.818	1.046e-07	1.897e-06	A0A167XKG4_PENCH	Peptidase A2 domain-containing protein	464
EN45_048410	3.427	1.051	4.685e-06	2.914e-05	A0A167RQS5_PENCH	Uncharacterized protein	152
EN45_101610	3.422	3.852	9.188e-10	9.106e-08	A0A167RGT9_PENCH	Uncharacterized protein	240
EN45_003580	3.411	4.932	1.063e-09	9.983e-08	A0A167VB72_PENCH	Putative transporter	509	GO:0016020; GO:0022857		membrane [GO:0016020]	transmembrane transporter activity [GO:0022857]
EN45_027620	3.402	6.44	4.478e-06	2.816e-05	A0A167XAJ7_PENCH	PI-PLC X domain-containing protein	328	GO:0006629; GO:0008081	lipid metabolic process [GO:0006629]		phosphoric diester hydrolase activity [GO:0008081]
EN45_109430	3.398	2.995	3.28e-07	4.199e-06	A0A167PUB9_PENCH	EamA domain-containing protein	193	GO:0016020		membrane [GO:0016020]
EN45_046360	3.387	4.623	2.457e-09	1.812e-07	A0A167YRH6_PENCH	Vacuolar basic amino acid transporter	536	GO:0016020; GO:0022857		membrane [GO:0016020]	transmembrane transporter activity [GO:0022857]
EN45_044880	3.382	3.517	6.597e-09	3.035e-07	A0A167YM70_PENCH	Laccase-1	573	GO:0005507; GO:0016491			copper ion binding [GO:0005507]; oxidoreductase activity [GO:0016491]
EN45_019730	3.379	9.81	8.336e-12	8.287e-09	A0A167WMC0_PENCH	Disulfide-bond oxidoreductase YfcG	252
EN45_102460	3.367	7.167	2.036e-10	3.634e-08	A0A167RIX1_PENCH	RING-type domain-containing protein	572
EN45_082420	3.354	-0.04916	0.000116	0.0003786	A0A167UTJ7_PENCH	A_deaminase domain-containing protein	342
EN45_110690	3.348	8.202	1.19e-09	1.073e-07	A0A167PWW9_PENCH	Patatin-like phospholipase domain-containing protein (EC 3.1.1.-)	784	GO:0004806; GO:0006641; GO:0016020; GO:0016042	lipid catabolic process [GO:0016042]; triglyceride metabolic process [GO:0006641]	membrane [GO:0016020]	triglyceride lipase activity [GO:0004806]
EN45_077740	3.344	2.766	3.217e-08	8.595e-07	A0A167UE65_PENCH	Plasma membrane ATPase (EC 7.1.2.1)	1011	GO:0005524; GO:0005886; GO:0008553; GO:0016887; GO:0120029	proton export across plasma membrane [GO:0120029]	plasma membrane [GO:0005886]	ATP binding [GO:0005524]; ATP hydrolysis activity [GO:0016887]; P-type proton-exporting transporter activity [GO:0008553]
EN45_033160	3.342	7.461	3.165e-10	4.955e-08	A0A167XS52_PENCH	Metallothionein expression activator	721	GO:0005634		nucleus [GO:0005634]
EN45_068290	3.316	1.183	4.638e-06	2.89e-05	A0A167TGT1_PENCH	DUF3047 domain-containing protein	239
EN45_031100	3.314	3.88	5.682e-08	1.264e-06	A0A167XL43_PENCH	Zn(2)-C6 fungal-type domain-containing protein	729	GO:0000981; GO:0003677; GO:0005634; GO:0008270; GO:0045944	positive regulation of transcription by RNA polymerase II [GO:0045944]	nucleus [GO:0005634]	DNA binding [GO:0003677]; DNA-binding transcription factor activity, RNA polymerase II-specific [GO:0000981]; zinc ion binding [GO:0008270]
EN45_014350	3.302	2.516	2.141e-08	6.615e-07	A0A167W608_PENCH	Isotrichodermin C-15 hydroxylase	452	GO:0004497; GO:0005506; GO:0016020; GO:0016705; GO:0020037; GO:0030639; GO:0043386; GO:1901336; GO:1901617	lactone biosynthetic process [GO:1901336]; mycotoxin biosynthetic process [GO:0043386]; organic hydroxy compound biosynthetic process [GO:1901617]; polyketide biosynthetic process [GO:0030639]	membrane [GO:0016020]	heme binding [GO:0020037]; iron ion binding [GO:0005506]; monooxygenase activity [GO:0004497]; oxidoreductase activity, acting on paired donors, with incorporation or reduction of molecular oxygen [GO:0016705]
EN45_036430	3.302	8.889	2.012e-07	2.993e-06	A0A167Y1P9_PENCH	Aminotran_1_2 domain-containing protein	440	GO:0003824; GO:0009058; GO:0030170	biosynthetic process [GO:0009058]		catalytic activity [GO:0003824]; pyridoxal phosphate binding [GO:0030170]
EN45_032550	3.3	2.559	6.703e-07	6.97e-06	A0A161ZL29_PENCH	Calcium/calmodulin-dependent protein kinase	542	GO:0004672; GO:0005524; GO:0006468	protein phosphorylation [GO:0006468]		ATP binding [GO:0005524]; protein kinase activity [GO:0004672]
EN45_079650	3.297	3.815	1.797e-08	5.918e-07	A0A167UKK6_PENCH	SnoaL-like domain-containing protein	258
EN45_089780	3.295	3.269	5.055e-07	5.72e-06	A0A162CQ27_PENCH	Polyketide synthase-nonribosomal peptide synthetase	2501	GO:0004315; GO:0006633; GO:0008168; GO:0018130; GO:0031177; GO:0032259; GO:0044550; GO:1901362	fatty acid biosynthetic process [GO:0006633]; heterocycle biosynthetic process [GO:0018130]; methylation [GO:0032259]; organic cyclic compound biosynthetic process [GO:1901362]; secondary metabolite biosynthetic process [GO:0044550]		3-oxoacyl-[acyl-carrier-protein] synthase activity [GO:0004315]; methyltransferase activity [GO:0008168]; phosphopantetheine binding [GO:0031177]
EN45_051840	3.287	1.751	6.48e-07	6.811e-06	A0A167S0I3_PENCH	amidase (EC 3.5.1.4)	582	GO:0004040; GO:0043864			amidase activity [GO:0004040]; indoleacetamide hydrolase activity [GO:0043864]
EN45_107440	3.275	-0.3478	0.0004152	0.001091	A0A167PQ66_PENCH	Secreted protein	210
EN45_059100	3.272	8.486	1.577e-09	1.28e-07	A0A167SME6_PENCH	MFS antiporter	742	GO:0016020; GO:0022857		membrane [GO:0016020]	transmembrane transporter activity [GO:0022857]
EN45_058880	3.27	0.4186	0.0005325	0.001336	A0A167SLP9_PENCH	Hce2 domain-containing protein	122
EN45_039090	3.268	5.327	4.177e-09	2.374e-07	A0A167Y9E8_PENCH	Similar to	455
EN45_039060	3.259	4.784	1.429e-09	1.214e-07	A0A167Y9C5_PENCH	Riboflavin transporter	434	GO:0016020; GO:0022857		membrane [GO:0016020]	transmembrane transporter activity [GO:0022857]
EN45_072690	3.257	8.784	5.626e-10	6.98e-08	A0A167TWJ0_PENCH	Quinone oxidoreductase	305
EN45_102520	3.233	1.614	8.2e-07	8.051e-06	A0A167RJ16_PENCH	Retrovirus-related Pol polyprotein from transposon TNT 1-94	277
EN45_057320	3.229	4.929	7.333e-08	1.48e-06	A0A167SHD7_PENCH	phosphomevalonate kinase (EC 2.7.4.2)	998	GO:0004631; GO:0005524; GO:0005829; GO:0006695; GO:0016310; GO:0016757; GO:0019287; GO:0071949	cholesterol biosynthetic process [GO:0006695]; isopentenyl diphosphate biosynthetic process, mevalonate pathway [GO:0019287]; phosphorylation [GO:0016310]	cytosol [GO:0005829]	ATP binding [GO:0005524]; FAD binding [GO:0071949]; glycosyltransferase activity [GO:0016757]; phosphomevalonate kinase activity [GO:0004631]
EN45_081010	3.223	1.588	0.000108	0.0003575	A0A167UPU0_PENCH	CAF1 family ribonuclease	556	GO:0003676			nucleic acid binding [GO:0003676]
EN45_105190	3.206	0.5304	5.9e-06	3.478e-05	A0A162BXD5_PENCH	Vacuolar membrane amino acid uptake transporter	538	GO:0016020; GO:0022857		membrane [GO:0016020]	transmembrane transporter activity [GO:0022857]
EN45_000900	3.205	0.5541	5.544e-05	0.0002067	A0A167V405_PENCH	D-amino-acid oxidase	349	GO:0003884; GO:0046416; GO:0071949	D-amino acid metabolic process [GO:0046416]		D-amino-acid oxidase activity [GO:0003884]; FAD binding [GO:0071949]
EN45_024380	3.189	2.285	3.603e-06	2.394e-05	A0A167X0U7_PENCH	GDSL esterase/lipase	294	GO:0016788			hydrolase activity, acting on ester bonds [GO:0016788]
EN45_034500	3.188	8.4	1.941e-08	6.185e-07	A0A167XW65_PENCH	ADP-ribosylation factor	586	GO:0016020		membrane [GO:0016020]
EN45_002750	3.159	2.734	3.571e-07	4.501e-06	A0A167V8Z1_PENCH	DUF4219 domain-containing protein	559
EN45_022960	3.139	7.864	3.881e-09	2.313e-07	A0A167WWT3_PENCH	Histidine-rich glycoprotein	873
EN45_088380	3.136	0.4405	7.778e-05	0.0002736	A0A167QFF6_PENCH	ACT_7 domain-containing protein	105
EN45_062900	3.134	2.593	1.581e-06	1.291e-05	A0A167SZU3_PENCH	Adenine phosphoribosyltransferase	187	GO:0016757			glycosyltransferase activity [GO:0016757]
EN45_075650	3.131	1.23	1.965e-06	1.504e-05	A0A167U6L6_PENCH	NADPH--cytochrome P450 reductase (EC 1.6.2.4)	707	GO:0003958; GO:0005741; GO:0005789; GO:0010181; GO:0016126	sterol biosynthetic process [GO:0016126]	endoplasmic reticulum membrane [GO:0005789]; mitochondrial outer membrane [GO:0005741]	FMN binding [GO:0010181]; NADPH-hemoprotein reductase activity [GO:0003958]
EN45_106650	3.131	5.925	7.454e-07	7.5e-06	A0A167PNW3_PENCH	Secreted protein	179
EN45_071500	3.13	4.367	4.682e-10	6.632e-08	A0A167TSK0_PENCH	Acetyltransferase	202	GO:0016740			transferase activity [GO:0016740]
EN45_004700	3.122	3.575	1.326e-06	1.132e-05	A0A167VEF3_PENCH	non-specific serine/threonine protein kinase (EC 2.7.11.1)	1197	GO:0004674; GO:0005524; GO:0006468	protein phosphorylation [GO:0006468]		ATP binding [GO:0005524]; protein serine/threonine kinase activity [GO:0004674]
EN45_091850	3.122	2.796	7.408e-06	4.177e-05	A0A167QPT1_PENCH	General alpha-glucoside permease	566	GO:0016020; GO:0022857		membrane [GO:0016020]	transmembrane transporter activity [GO:0022857]
EN45_076350	3.121	1.528	3.261e-07	4.193e-06	A0A167U913_PENCH	Putative secreted protein	206
EN45_109190	3.118	8.411	1.244e-11	8.287e-09	A0A167PTQ6_PENCH	Nonribosomal peptide synthetase	6069	GO:0016874; GO:0018130; GO:0031177; GO:0044283; GO:0044550; GO:1901362	heterocycle biosynthetic process [GO:0018130]; organic cyclic compound biosynthetic process [GO:1901362]; secondary metabolite biosynthetic process [GO:0044550]; small molecule biosynthetic process [GO:0044283]		ligase activity [GO:0016874]; phosphopantetheine binding [GO:0031177]
EN45_046570	3.115	1.665	3.42e-05	0.0001406	A0A167YS86_PENCH	Tetracycline resistance protein, class B	353	GO:0016020; GO:0022857		membrane [GO:0016020]	transmembrane transporter activity [GO:0022857]
EN45_110750	3.115	-0.6152	0.000261	0.0007415	A0A167PX24_PENCH	amidase (EC 3.5.1.4)	557	GO:0004040; GO:0043864			amidase activity [GO:0004040]; indoleacetamide hydrolase activity [GO:0043864]
EN45_022980	3.113	1.88	2.19e-05	9.778e-05	A0A167WWU4_PENCH	Major allergen Asp f	289	GO:0008237			metallopeptidase activity [GO:0008237]
EN45_091700	3.112	2.983	2.879e-05	0.0001225	A0A167QPA8_PENCH	UPF0676 protein	358
EN45_023810	3.104	2.497	2.607e-07	3.553e-06	A0A167WZ52_PENCH	Integral membrane protein	401	GO:0016020		membrane [GO:0016020]
EN45_092840	3.1	6.265	2.4e-11	1.032e-08	A0A167QS73_PENCH	Maleylacetoacetate isomerase	226	GO:0005737; GO:0009072; GO:0016853	aromatic amino acid metabolic process [GO:0009072]	cytoplasm [GO:0005737]	isomerase activity [GO:0016853]
EN45_057310	3.094	4.577	2.942e-08	8.179e-07	A0A167SHC8_PENCH	GTP cyclohydrolase 1 (EC 3.5.4.16) (GTP cyclohydrolase I)	302	GO:0003934; GO:0035998; GO:0046654; GO:0046656	7,8-dihydroneopterin 3'-triphosphate biosynthetic process [GO:0035998]; folic acid biosynthetic process [GO:0046656]; tetrahydrofolate biosynthetic process [GO:0046654]		GTP cyclohydrolase I activity [GO:0003934]
EN45_080850	3.092	7.047	6.118e-08	1.332e-06	A0A167UPC9_PENCH	Putative transporter	519	GO:0016020; GO:0022857		membrane [GO:0016020]	transmembrane transporter activity [GO:0022857]
EN45_087220	3.084	0.1578	1.326e-05	6.539e-05	A0A167QC12_PENCH	Secreted protein	316
EN45_100560	3.084	-1.039	0.0002287	0.0006619	A0A162CSD6_PENCH	C2H2-type domain-containing protein	165
EN45_053190	3.078	1.482	9.866e-07	9.171e-06	A0A167S4J8_PENCH	Putative urea carboxylase	1247	GO:0005524; GO:0016787; GO:0016874; GO:0046872			ATP binding [GO:0005524]; hydrolase activity [GO:0016787]; ligase activity [GO:0016874]; metal ion binding [GO:0046872]
EN45_060830	3.065	2.315	2.681e-07	3.625e-06	A0A167STH3_PENCH	DUF6536 domain-containing protein	809	GO:0016020		membrane [GO:0016020]
EN45_075000	3.062	1.005	5.868e-06	3.463e-05	A0A167U4C8_PENCH	Signal peptide protein	209	GO:0016020		membrane [GO:0016020]
EN45_080980	3.059	4.238	1.829e-07	2.794e-06	A0A167UPR5_PENCH	G protein-coupled receptor	401	GO:0016020		membrane [GO:0016020]
EN45_032020	3.055	0.1107	9.304e-05	0.0003169	A0A167XNP6_PENCH	Beta-glucuronidase	478	GO:0005576		extracellular region [GO:0005576]
EN45_095250	3.051	1.546	1.856e-06	1.453e-05	A0A167QYL5_PENCH	Uncharacterized protein	111
EN45_074830	3.048	3.12	1.193e-08	4.491e-07	A0A167U3S2_PENCH	indoleamine 2,3-dioxygenase (EC 1.13.11.52)	495	GO:0019441; GO:0020037; GO:0046872; GO:0051213	tryptophan catabolic process to kynurenine [GO:0019441]		dioxygenase activity [GO:0051213]; heme binding [GO:0020037]; metal ion binding [GO:0046872]
EN45_086560	3.046	0.1418	0.0001222	0.0003947	A0A167QAB5_PENCH	DUF29 domain-containing protein	219
EN45_021720	3.026	4.479	2.985e-08	8.267e-07	A0A167WTE7_PENCH	Multidrug resistance protein-like protein	1363	GO:0005524; GO:0016020; GO:0140359		membrane [GO:0016020]	ABC-type transporter activity [GO:0140359]; ATP binding [GO:0005524]
EN45_036440	3.022	8.726	3.429e-08	8.973e-07	A0A167Y1R0_PENCH	Putative glucan endo-1,3-beta-glucosidase	948	GO:0005576		extracellular region [GO:0005576]
EN45_078990	3.019	6.412	1.408e-09	1.208e-07	A0A167UIF5_PENCH	N-acetyltransferase	646	GO:0003684; GO:0005634; GO:0016740; GO:0070987	error-free translesion synthesis [GO:0070987]	nucleus [GO:0005634]	damaged DNA binding [GO:0003684]; transferase activity [GO:0016740]
EN45_040680	3.011	3.621	7.125e-06	4.053e-05	A0A169X9M3_PENCH	Uncharacterized protein	438
EN45_035000	3.009	-0.005623	0.0005544	0.001382	A0A167XXK6_PENCH	Maleylacetate reductase	357	GO:0017183; GO:0018506; GO:0046872; GO:0090560	peptidyl-diphthamide biosynthetic process from peptidyl-histidine [GO:0017183]		2-(3-amino-3-carboxypropyl)histidine synthase activity [GO:0090560]; maleylacetate reductase activity [GO:0018506]; metal ion binding [GO:0046872]
EN45_072150	3.003	-0.01057	0.0001575	0.0004887	A0A167TUP7_PENCH	MBOAT_2 domain-containing protein	368	GO:0006629; GO:0008374; GO:0016020	lipid metabolic process [GO:0006629]	membrane [GO:0016020]	O-acyltransferase activity [GO:0008374]
EN45_087650	3.003	-0.6571	0.0001156	0.0003774	A0A167QDB3_PENCH	Uncharacterized protein	176
EN45_069410	3.002	1.379	2.966e-06	2.066e-05	A0A167TK97_PENCH	Signaling protein	739	GO:0016020		membrane [GO:0016020]
EN45_104850	2.998	1.019	7.721e-05	0.000272	A0A162CLZ1_PENCH	NADH oxidase	444	GO:0010181; GO:0016491			FMN binding [GO:0010181]; oxidoreductase activity [GO:0016491]
EN45_090600	2.997	4.706	5.055e-10	6.634e-08	A0A167QLD4_PENCH	Nuclease	344	GO:0003676; GO:0004519; GO:0006308; GO:0046872	DNA catabolic process [GO:0006308]		endonuclease activity [GO:0004519]; metal ion binding [GO:0046872]; nucleic acid binding [GO:0003676]
EN45_010020	2.996	1.067	1.483e-05	7.135e-05	A0A167VTJ5_PENCH	Apple domain-containing protein	370
EN45_008520	2.991	-0.2789	0.000125	0.000402	A0A167VNX8_PENCH	4-hydroxy-tetrahydrodipicolinate synthase	296	GO:0016829			lyase activity [GO:0016829]
EN45_050230	2.991	1.108	8.576e-05	0.0002973	A0A167RVQ4_PENCH	CAZy families GH13 protein	90
EN45_069220	2.99	0.1022	2.083e-05	9.4e-05	A0A167TJR3_PENCH	Putative transporter	501	GO:0016020; GO:0022857		membrane [GO:0016020]	transmembrane transporter activity [GO:0022857]
EN45_014940	2.989	3.589	2.568e-07	3.537e-06	A0A167W7Y2_PENCH	DSBA domain-containing protein	232	GO:0016491			oxidoreductase activity [GO:0016491]
EN45_006190	2.987	-0.7309	0.0001226	0.0003956	A0A169X7B7_PENCH	Hap4_Hap_bind domain-containing protein	213
EN45_031110	2.984	2.836	2.676e-08	7.728e-07	A0A167XL51_PENCH	DUF924-domain-containing protein	255
EN45_100520	2.974	7.864	3.754e-10	5.678e-08	A0A167RDI1_PENCH	APH domain-containing protein	458
EN45_066210	2.973	8.931	1.248e-11	8.287e-09	A0A167TAA5_PENCH	Phytanoyl-CoA dioxygenase family protein	315
EN45_071690	2.973	0.5158	0.0001464	0.00046	A0A167TT76_PENCH	Hce2 domain-containing protein	139
EN45_072460	2.968	3.702	3.712e-06	2.455e-05	A0A167TVN8_PENCH	Putative transporter	574	GO:0016020; GO:0022857		membrane [GO:0016020]	transmembrane transporter activity [GO:0022857]
EN45_004070	2.96	3.265	6.439e-09	2.993e-07	A0A167VCM0_PENCH	Putative permease	561	GO:0016020; GO:0022857		membrane [GO:0016020]	transmembrane transporter activity [GO:0022857]
EN45_114750	2.96	9.946	7.423e-11	1.85e-08	A0A167Q5N8_PENCH	C2H2-type domain-containing protein	517
EN45_058870	2.956	3.618	8.959e-08	1.697e-06	A0A167SLP6_PENCH	AB hydrolase-1 domain-containing protein	288	GO:0017000; GO:0072330	antibiotic biosynthetic process [GO:0017000]; monocarboxylic acid biosynthetic process [GO:0072330]
EN45_062880	2.948	2.673	5.706e-07	6.247e-06	A0A167SZR9_PENCH	DUF4219 domain-containing protein	577
EN45_038290	2.947	9.145	3.116e-08	8.401e-07	A0A167Y701_PENCH	Putative N-acetyltransferase	231	GO:0016407			acetyltransferase activity [GO:0016407]
EN45_111650	2.939	5.24	9.41e-09	3.834e-07	A0A167PZB9_PENCH	1-alkyl-2-acetylglycerophosphocholine esterase	316
EN45_051040	2.932	0.5917	0.0001121	0.0003682	A0A167RY78_PENCH	MINDY_DUB domain-containing protein	325
EN45_095650	2.929	6.016	1.587e-08	5.404e-07	A0A167QZV8_PENCH	Putative ubiquitin-conjugating enzyme E2 W	144	GO:0070647	protein modification by small protein conjugation or removal [GO:0070647]
EN45_100640	2.929	7.973	1.075e-09	9.991e-08	A0A167RDW3_PENCH	Bifunctional P-450:NADPH-P450 reductase	466	GO:0004497; GO:0005506; GO:0016705; GO:0020037; GO:0030639; GO:0043386; GO:1901336; GO:1901617	lactone biosynthetic process [GO:1901336]; mycotoxin biosynthetic process [GO:0043386]; organic hydroxy compound biosynthetic process [GO:1901617]; polyketide biosynthetic process [GO:0030639]		heme binding [GO:0020037]; iron ion binding [GO:0005506]; monooxygenase activity [GO:0004497]; oxidoreductase activity, acting on paired donors, with incorporation or reduction of molecular oxygen [GO:0016705]
EN45_108690	2.927	0.007041	3.32e-05	0.0001375	A0A167PSQ3_PENCH	Zinc-type alcohol dehydrogenase-like protein	168
EN45_040550	2.919	4.094	5.179e-09	2.672e-07	A0A169X9A0_PENCH	Short-chain-enoyl-CoA hydratase	278	GO:0003824			catalytic activity [GO:0003824]
EN45_093120	2.916	7.886	2.225e-11	1.032e-08	A0A162CQS4_PENCH	UNC93-like protein	496	GO:0016020		membrane [GO:0016020]
EN45_077430	2.915	10.69	3.086e-07	4.033e-06	A0A167UD04_PENCH	Salivary secreted protein	62
EN45_003410	2.91	1.355	5.515e-05	0.0002062	A0A167VAQ6_PENCH	Uncharacterized protein	253
EN45_022020	2.907	7.611	8.045e-11	1.896e-08	A0A167WU87_PENCH	Molybdenum cofactor sulfurase (MCS) (MOS) (MoCo sulfurase) (EC 2.8.1.9) (Molybdenum cofactor sulfurtransferase)	840	GO:0006777; GO:0008265; GO:0016829; GO:0030151; GO:0030170; GO:0102867	Mo-molybdopterin cofactor biosynthetic process [GO:0006777]		lyase activity [GO:0016829]; Mo-molybdopterin cofactor sulfurase activity [GO:0008265]; molybdenum cofactor sulfurtransferase activity [GO:0102867]; molybdenum ion binding [GO:0030151]; pyridoxal phosphate binding [GO:0030170]
EN45_054480	2.899	7.476	4.51e-10	6.581e-08	A0A167S8K1_PENCH	VOC domain-containing protein	592
EN45_103650	2.891	2.155	8.966e-06	4.864e-05	A0A167RLW8_PENCH	EthD domain-containing protein	137	GO:0016491			oxidoreductase activity [GO:0016491]
EN45_066110	2.889	1.38	3.494e-06	2.338e-05	A0A167T9Y6_PENCH	Uncharacterized protein	322
EN45_034630	2.886	4.061	1.657e-09	1.333e-07	A0A167XWI4_PENCH	HET domain-containing protein	717
EN45_099360	2.886	0.6628	0.0006479	0.001577	A0A167RA63_PENCH	CAP10 domain-containing protein	696
EN45_110760	2.886	2.302	7.642e-06	4.281e-05	A0A167PX44_PENCH	DAO domain-containing protein	509	GO:0016491			oxidoreductase activity [GO:0016491]
EN45_039740	2.883	3.612	6.843e-08	1.407e-06	A0A167YB26_PENCH	D-xylose reductase [NAD(P)H] (EC 1.1.1.307)	319	GO:0032866; GO:0042843	D-xylose catabolic process [GO:0042843]		D-xylose:NADP reductase activity [GO:0032866]
EN45_039140	2.875	0.1393	1.255e-05	6.263e-05	A0A167Y9H5_PENCH	Sugar transporter	570	GO:0008643; GO:0016020; GO:0022857	carbohydrate transport [GO:0008643]	membrane [GO:0016020]	transmembrane transporter activity [GO:0022857]
EN45_084920	2.873	-0.285	0.005043	0.009277	A0A167V0C2_PENCH	RusA family crossover junction endodeoxyribonuclease	147
EN45_069280	2.872	4.894	2.564e-09	1.847e-07	A0A167TJW6_PENCH	MIT domain-containing protein	396
EN45_023170	2.864	4.119	1.559e-08	5.351e-07	A0A167WXB9_PENCH	DNA-directed RNA polymerase	86	GO:0006479	protein methylation [GO:0006479]
EN45_021670	2.861	1.277	5.652e-06	3.374e-05	A0A167WTB2_PENCH	Sodium-and chloride-dependent GABA transporter	672	GO:0015293; GO:0016020		membrane [GO:0016020]	symporter activity [GO:0015293]
EN45_011400	2.852	9.155	4.463e-11	1.493e-08	A0A167VXJ1_PENCH	Putative bHLH domain-containing protein	290	GO:0046983			protein dimerization activity [GO:0046983]
EN45_069110	2.849	-0.1249	3.609e-05	0.0001469	A0A167TJC9_PENCH	Putative MFS-type transporter	604	GO:0016020; GO:0022857		membrane [GO:0016020]	transmembrane transporter activity [GO:0022857]
EN45_037700	2.846	6.761	2.443e-09	1.812e-07	A0A167Y545_PENCH	Choline monooxygenase, chloroplastic (EC 1.14.15.7)	420	GO:0005506; GO:0019133; GO:0019285; GO:0051537	glycine betaine biosynthetic process from choline [GO:0019285]		2 iron, 2 sulfur cluster binding [GO:0051537]; choline monooxygenase activity [GO:0019133]; iron ion binding [GO:0005506]
EN45_026050	2.842	1.892	2.677e-06	1.905e-05	A0A110AZ24_PENCH	Rhamnogalacturonan rhamnohydrolase	680	GO:0005975; GO:0016787	carbohydrate metabolic process [GO:0005975]		hydrolase activity [GO:0016787]
EN45_070480	2.838	6.512	7.615e-09	3.283e-07	A0A167TP42_PENCH	Putative vacuolar membrane protein	413	GO:0005783; GO:0005794; GO:0008643; GO:0016020	carbohydrate transport [GO:0008643]	endoplasmic reticulum [GO:0005783]; Golgi apparatus [GO:0005794]; membrane [GO:0016020]
EN45_093720	2.834	0.7405	0.0002653	0.0007499	A0A162CQV7_PENCH	AA1-like domain-containing protein	153
EN45_000150	2.833	5.886	2.123e-06	1.594e-05	A0A167V1P1_PENCH	Non-specific phospholipase C6	426	GO:0016788			hydrolase activity, acting on ester bonds [GO:0016788]
EN45_068430	2.832	1.826	1.19e-06	1.046e-05	A0A167TH93_PENCH	DUF3074 domain-containing protein	338
EN45_024200	2.824	2.579	2.245e-07	3.218e-06	A0A167X0B4_PENCH	UPF0214 protein	431
EN45_056380	2.816	9.157	7.463e-11	1.85e-08	A0A161XWM8_PENCH	Calcium-transporting ATPase	1067	GO:0005524; GO:0016020; GO:0016887; GO:0019829		membrane [GO:0016020]	ATP binding [GO:0005524]; ATP hydrolysis activity [GO:0016887]; ATPase-coupled cation transmembrane transporter activity [GO:0019829]
EN45_017700	2.81	2.554	3.387e-07	4.306e-06	A0A167WGS6_PENCH	Uncharacterized protein	136
EN45_100510	2.799	7.917	1.344e-10	2.788e-08	A0A167RDH1_PENCH	BRCT domain-containing protein	868
EN45_065670	2.797	-0.07376	4.589e-05	0.0001777	A0A167T8J1_PENCH	Putative translation initiation factor eIF-2B subunit gamma	386	GO:0003743; GO:0004475; GO:0030154; GO:0043934; GO:0048856	anatomical structure development [GO:0048856]; cell differentiation [GO:0030154]; sporulation [GO:0043934]		mannose-1-phosphate guanylyltransferase (GTP) activity [GO:0004475]; translation initiation factor activity [GO:0003743]
EN45_011510	2.791	4.85	1.863e-08	6.047e-07	A0A161ZG85_PENCH	O-methylsterigmatocystin oxidoreductase	530	GO:0004497; GO:0005506; GO:0016705; GO:0020037; GO:0030639; GO:0043386; GO:1901336; GO:1901617	lactone biosynthetic process [GO:1901336]; mycotoxin biosynthetic process [GO:0043386]; organic hydroxy compound biosynthetic process [GO:1901617]; polyketide biosynthetic process [GO:0030639]		heme binding [GO:0020037]; iron ion binding [GO:0005506]; monooxygenase activity [GO:0004497]; oxidoreductase activity, acting on paired donors, with incorporation or reduction of molecular oxygen [GO:0016705]
EN45_085870	2.776	7.942	2.474e-10	4.088e-08	A0A162BFE9_PENCH	CENP-V/GFA domain-containing protein	136	GO:0016846; GO:0046872			carbon-sulfur lyase activity [GO:0016846]; metal ion binding [GO:0046872]
EN45_105240	2.771	3.394	4.876e-07	5.652e-06	A0A167PKN0_PENCH	Histone domain-containing protein	159
EN45_020090	2.77	-0.1956	0.0001343	0.000427	A0A167WNE6_PENCH	ACOX domain-containing protein	73
EN45_067290	2.769	-0.2738	0.0004772	0.001219	A0A167TDM4_PENCH	EKC/KEOPS complex subunit BUD32 (EC 2.7.11.1) (Atypical Serine/threonine protein kinase BUD32) (EKC/KEOPS complex subunit bud32)	525	GO:0000781; GO:0004674; GO:0005524; GO:0006468	protein phosphorylation [GO:0006468]	chromosome, telomeric region [GO:0000781]	ATP binding [GO:0005524]; protein serine/threonine kinase activity [GO:0004674]
EN45_092350	2.765	2.108	3.499e-05	0.0001431	A0A162C186_PENCH	DUF5082 domain-containing protein	112
EN45_012430	2.764	2.786	2.996e-08	8.267e-07	A0A167W0E9_PENCH	Metal homeostasis factor	79	GO:0046872			metal ion binding [GO:0046872]
EN45_000100	2.762	-0.7566	0.00133	0.002922	A0A167V1K8_PENCH	Zn(2)-C6 fungal-type domain-containing protein	535	GO:0000981; GO:0003677; GO:0005634; GO:0008270		nucleus [GO:0005634]	DNA binding [GO:0003677]; DNA-binding transcription factor activity, RNA polymerase II-specific [GO:0000981]; zinc ion binding [GO:0008270]
EN45_028740	2.744	3.39	4.942e-07	5.668e-06	A0A167XDW8_PENCH	N-acetyltransferase domain-containing protein	199	GO:0016407			acetyltransferase activity [GO:0016407]
EN45_091990	2.741	5.704	3.677e-09	2.232e-07	A0A167QQ77_PENCH	Flavin-nucleotide-binding protein	310	GO:0016020		membrane [GO:0016020]
EN45_028750	2.74	6.829	6.906e-11	1.818e-08	A0A167XDX7_PENCH	Methyltransferase	296	GO:0016491			oxidoreductase activity [GO:0016491]
EN45_031860	2.736	0.7204	8.47e-05	0.0002939	A0A167XN84_PENCH	Reticuline oxidase	439	GO:0016491; GO:0044550; GO:0071949; GO:1901576	organic substance biosynthetic process [GO:1901576]; secondary metabolite biosynthetic process [GO:0044550]		FAD binding [GO:0071949]; oxidoreductase activity [GO:0016491]
EN45_047760	2.732	4.474	4.286e-09	2.405e-07	A0A162CT95_PENCH	Zinc finger protein	284	GO:0005634		nucleus [GO:0005634]
EN45_049170	2.729	5.317	1.772e-09	1.391e-07	A0A167RSQ4_PENCH	Putative oxidoreductase YteT	434	GO:0000166			nucleotide binding [GO:0000166]
EN45_005550	2.726	0.8589	0.0003571	0.0009643	A0A169X4N1_PENCH	Putative FAD-linked oxidoreductase	577	GO:0016491; GO:0044550; GO:0071949; GO:1901576	organic substance biosynthetic process [GO:1901576]; secondary metabolite biosynthetic process [GO:0044550]		FAD binding [GO:0071949]; oxidoreductase activity [GO:0016491]
EN45_059200	2.719	2.815	1.436e-06	1.197e-05	A0A167SML3_PENCH	Protein PcFluG	411	GO:0016787			hydrolase activity [GO:0016787]
EN45_070310	2.718	2.118	4.218e-06	2.698e-05	A0A167TNH7_PENCH	Myb-like domain-containing protein	659
EN45_101440	2.717	-0.3308	0.0001694	0.0005171	A0A167RGB6_PENCH	NTF2-related export protein	133	GO:0005634; GO:0005737; GO:0006606; GO:0051028	mRNA transport [GO:0051028]; protein import into nucleus [GO:0006606]	cytoplasm [GO:0005737]; nucleus [GO:0005634]
EN45_014390	2.708	2.11	4.712e-06	2.924e-05	A0A161ZGV4_PENCH	Chitin deacetylase	255	GO:0005975; GO:0016810	carbohydrate metabolic process [GO:0005975]		hydrolase activity, acting on carbon-nitrogen (but not peptide) bonds [GO:0016810]
EN45_050280	2.708	3.188	2.747e-08	7.799e-07	A0A167RVV4_PENCH	Fungal_trans domain-containing protein	381
EN45_085320	2.707	-0.431	0.0004276	0.001117	A0A167Q6N8_PENCH	Glucose oxidase	591	GO:0016614; GO:0050660			flavin adenine dinucleotide binding [GO:0050660]; oxidoreductase activity, acting on CH-OH group of donors [GO:0016614]
EN45_013860	2.704	2.336	1.717e-06	1.372e-05	A0A167W4M8_PENCH	DotA/TraY family protein	604	GO:0016020		membrane [GO:0016020]
EN45_066190	2.704	-0.3113	0.0002012	0.0005951	A0A167TA79_PENCH	Restriction endonuclease	213
EN45_053570	2.703	4.24	1.842e-08	6.021e-07	A0A167S5W4_PENCH	Pirin	301
EN45_063060	2.703	0.8714	1.417e-05	6.9e-05	A0A167T090_PENCH	Transmembrane protein	415	GO:0016020		membrane [GO:0016020]
EN45_032540	2.7	3.732	2.465e-08	7.309e-07	A0A167XQA5_PENCH	MutS protein-like protein	942	GO:0005524; GO:0006298; GO:0030983; GO:0140664	mismatch repair [GO:0006298]		ATP binding [GO:0005524]; ATP-dependent DNA damage sensor activity [GO:0140664]; mismatched DNA binding [GO:0030983]
EN45_075970	2.693	5.02	4.243e-05	0.0001668	A0A167U7Q2_PENCH	Leptomycin B resistance protein	1277	GO:0005524; GO:0016020; GO:0140359		membrane [GO:0016020]	ABC-type transporter activity [GO:0140359]; ATP binding [GO:0005524]
EN45_022700	2.691	2.516	5.48e-07	6.082e-06	A0A167WW13_PENCH	SET domain-containing protein	746
EN45_059340	2.688	1.772	4.17e-06	2.681e-05	A0A167SN12_PENCH	Linear gramicidin synthase subunit D	1080
EN45_045940	2.686	2.623	2.354e-06	1.729e-05	A0A161ZNU8_PENCH	Putative secreted protein	158
EN45_050840	2.686	5.374	1.852e-08	6.032e-07	A0A161XVF9_PENCH	Putative CDP-alcohol phosphatidyltransferase class-I family protein	332	GO:0008654; GO:0016020; GO:0016780	phospholipid biosynthetic process [GO:0008654]	membrane [GO:0016020]	phosphotransferase activity, for other substituted phosphate groups [GO:0016780]
EN45_085410	2.686	5.151	1.456e-08	5.058e-07	A0A162BZQ1_PENCH	Nitrogen assimilation transcription factor	754	GO:0000981; GO:0003677; GO:0005634; GO:0008270		nucleus [GO:0005634]	DNA binding [GO:0003677]; DNA-binding transcription factor activity, RNA polymerase II-specific [GO:0000981]; zinc ion binding [GO:0008270]
EN45_000950	2.685	3.978	1.334e-07	2.217e-06	A0A167V446_PENCH	Cyclohexanone 1,2-monooxygenase	578	GO:0004499; GO:0050660; GO:0050661			flavin adenine dinucleotide binding [GO:0050660]; N,N-dimethylaniline monooxygenase activity [GO:0004499]; NADP binding [GO:0050661]
EN45_029130	2.684	1.144	1.136e-05	5.812e-05	A0A167XF63_PENCH	Dicarboxylic amino acid permease	552	GO:0016020; GO:0055085	transmembrane transport [GO:0055085]	membrane [GO:0016020]
EN45_103050	2.684	2.376	4.94e-07	5.668e-06	A0A167RKF5_PENCH	Putative amidase	545
EN45_015900	2.68	6.879	1.048e-08	4.091e-07	A0A167WBI7_PENCH	IU_nuc_hydro domain-containing protein	438	GO:0006139; GO:0016799; GO:1901564	nucleobase-containing compound metabolic process [GO:0006139]; organonitrogen compound metabolic process [GO:1901564]		hydrolase activity, hydrolyzing N-glycosyl compounds [GO:0016799]
EN45_045020	2.679	0.8177	7.09e-05	0.0002528	A0A167YMI7_PENCH	Putative sterigmatocystin biosynthesis monooxygenase stcW	581	GO:0004497			monooxygenase activity [GO:0004497]
EN45_094380	2.677	6.765	2.188e-07	3.165e-06	A0A167QWF3_PENCH	Arabinan endo-1,5-alpha-L-arabinosidase (EC 3.2.1.99)	325	GO:0031222; GO:0046558	arabinan catabolic process [GO:0031222]		arabinan endo-1,5-alpha-L-arabinosidase activity [GO:0046558]
EN45_017420	2.676	8.433	2.758e-10	4.475e-08	A0A167WFX8_PENCH	Quinone oxidoreductase	310
EN45_101800	2.675	1.234	1.472e-05	7.101e-05	A0A167RHD3_PENCH	Argonaute-family protein PcAgo2	902	GO:0003676			nucleic acid binding [GO:0003676]
EN45_004270	2.674	1.035	0.000206	0.0006059	A0A167VD76_PENCH	Terpene cyclase/mutase family member (EC 5.4.99.-)	669	GO:0005811; GO:0016104; GO:0016866	triterpenoid biosynthetic process [GO:0016104]	lipid droplet [GO:0005811]	intramolecular transferase activity [GO:0016866]
EN45_079660	2.672	5.353	2.749e-07	3.689e-06	A0A167UKL6_PENCH	Zn(2)-C6 fungal-type domain-containing protein	631	GO:0000981; GO:0003677; GO:0005634; GO:0008270		nucleus [GO:0005634]	DNA binding [GO:0003677]; DNA-binding transcription factor activity, RNA polymerase II-specific [GO:0000981]; zinc ion binding [GO:0008270]
EN45_096660	2.668	3.076	5.103e-07	5.757e-06	A0A167R2W1_PENCH	Methyltranfer_dom domain-containing protein	275
EN45_056370	2.664	6.971	6.23e-11	1.818e-08	A0A167SER0_PENCH	Protein TOXD	345	GO:0016491			oxidoreductase activity [GO:0016491]
EN45_016780	2.663	2.739	5.969e-07	6.457e-06	A0A167WE20_PENCH	BZIP domain-containing protein	424
EN45_025090	2.662	1.996	1.923e-06	1.483e-05	A0A167X337_PENCH	Hly-III-related protein	237	GO:0016020		membrane [GO:0016020]
EN45_011090	2.661	2.723	1.705e-07	2.651e-06	A0A167VWP4_PENCH	Serine/threonine-protein kinase	801	GO:0004672; GO:0005524; GO:0006468	protein phosphorylation [GO:0006468]		ATP binding [GO:0005524]; protein kinase activity [GO:0004672]
EN45_007430	2.655	-0.3724	0.0005299	0.001331	A0A167VKB9_PENCH	Serine/threonine-protein kinase SRPK	405	GO:0004672; GO:0005524; GO:0006468	protein phosphorylation [GO:0006468]		ATP binding [GO:0005524]; protein kinase activity [GO:0004672]
EN45_017610	2.653	7.798	5.434e-09	2.7e-07	A0A167WGI8_PENCH	Phosphate-repressible acid phosphatase	413	GO:0016788			hydrolase activity, acting on ester bonds [GO:0016788]
EN45_063440	2.634	0.2545	0.0001287	0.0004119	A0A167T1D5_PENCH	DUF3074 domain-containing protein	426	GO:0016020		membrane [GO:0016020]
EN45_103040	2.632	2.433	2.805e-06	1.979e-05	A0A167RKF0_PENCH	Riboflavin transporter	462	GO:0016020; GO:0022857		membrane [GO:0016020]	transmembrane transporter activity [GO:0022857]
EN45_109420	2.63	4.292	3.763e-08	9.514e-07	A0A167PUB5_PENCH	G_PROTEIN_RECEP_F1_2 domain-containing protein	331	GO:0016020		membrane [GO:0016020]
EN45_008650	2.626	6.834	1.258e-09	1.1e-07	A0A167VPH0_PENCH	Permuted papain-like amidase enzyme, YaeF/YiiX, C92 family	210
EN45_011410	2.623	7.179	2.895e-09	1.9e-07	A0A161ZG76_PENCH	Protein N-terminal amidase	383	GO:0006807; GO:0008418; GO:0070773	nitrogen compound metabolic process [GO:0006807]		protein-N-terminal asparagine amidohydrolase activity [GO:0008418]; protein-N-terminal glutamine amidohydrolase activity [GO:0070773]
EN45_078750	2.622	-0.5623	0.0002792	0.0007818	A0A167UHE9_PENCH	MFS domain-containing protein	143	GO:0016020		membrane [GO:0016020]
EN45_015590	2.62	8.514	5.9e-10	7.116e-08	A0A167WA48_PENCH	UNC93-like protein	531	GO:0016020; GO:0022857		membrane [GO:0016020]	transmembrane transporter activity [GO:0022857]
EN45_010660	2.617	0.9836	0.0001023	0.0003423	A0A167VVG7_PENCH	Mediator complex subunit 6	256
EN45_003200	2.611	0.2954	0.0002325	0.0006705	A0A167VA71_PENCH	Uncharacterized protein	96
EN45_097470	2.6	2.287	4.783e-07	5.55e-06	A0A162CRQ8_PENCH	Zinc ribbon domain-containing protein	203	GO:0016020		membrane [GO:0016020]
EN45_056410	2.599	2.153	3.701e-06	2.452e-05	A0A167SEW0_PENCH	Apple domain-containing protein	254	GO:0016020		membrane [GO:0016020]
EN45_079680	2.598	5.523	2.122e-09	1.605e-07	A0A167UKP2_PENCH	Protein PBN1	555	GO:0000030; GO:0005789; GO:0006506	GPI anchor biosynthetic process [GO:0006506]	endoplasmic reticulum membrane [GO:0005789]	mannosyltransferase activity [GO:0000030]
EN45_003040	2.594	-0.1283	0.0001608	0.0004976	A0A167V9R8_PENCH	pyridoxal kinase (EC 2.7.1.35)	343	GO:0008478; GO:0009443; GO:0016310	phosphorylation [GO:0016310]; pyridoxal 5'-phosphate salvage [GO:0009443]		pyridoxal kinase activity [GO:0008478]
EN45_103400	2.592	9.076	2.664e-09	1.887e-07	A0A167RLA5_PENCH	Glucan 1,3-beta-glucosidase	816	GO:0005576		extracellular region [GO:0005576]
EN45_027590	2.589	6.324	8.06e-06	4.453e-05	A0A167XAG2_PENCH	Endo-1,3(4)-beta-glucanase	367	GO:0004553; GO:0005886; GO:0005975	carbohydrate metabolic process [GO:0005975]	plasma membrane [GO:0005886]	hydrolase activity, hydrolyzing O-glycosyl compounds [GO:0004553]
EN45_009850	2.586	2.113	9.893e-06	5.236e-05	A0A167VT23_PENCH	Gentisate 1,2-dioxygenase	328	GO:0051213			dioxygenase activity [GO:0051213]
EN45_049610	2.578	7.14	1.752e-08	5.818e-07	A0A167RTV3_PENCH	Putative glucose transporter	528	GO:0008643; GO:0016020; GO:0022857	carbohydrate transport [GO:0008643]	membrane [GO:0016020]	transmembrane transporter activity [GO:0022857]
EN45_066640	2.577	-0.4369	0.002748	0.005469	A0A167TBF7_PENCH	Phosphate transporter	595	GO:0005315; GO:0006817; GO:0015293; GO:0016020	phosphate ion transport [GO:0006817]	membrane [GO:0016020]	inorganic phosphate transmembrane transporter activity [GO:0005315]; symporter activity [GO:0015293]
EN45_042820	2.567	7.329	4.948e-07	5.668e-06	A0A167YGJ0_PENCH	MIT domain-containing protein	421	GO:0016020		membrane [GO:0016020]
EN45_080140	2.565	7.43	3.104e-07	4.038e-06	A0A167UM41_PENCH	Similar to	242	GO:0016020		membrane [GO:0016020]
EN45_032390	2.561	-0.07421	0.0001048	0.0003491	A0A167XPS1_PENCH	Altered inheritance of mitochondria protein	612
EN45_031050	2.56	4.532	1.413e-06	1.19e-05	A0A167XKZ7_PENCH	Carboxylic acid transporter protein-like protein	510	GO:0016020; GO:0022857		membrane [GO:0016020]	transmembrane transporter activity [GO:0022857]
EN45_000940	2.558	2.569	1.262e-05	6.291e-05	A0A161ZDI8_PENCH	Zn(2)-C6 fungal-type domain-containing protein	469	GO:0000981; GO:0003677; GO:0005634; GO:0008270; GO:0045944	positive regulation of transcription by RNA polymerase II [GO:0045944]	nucleus [GO:0005634]	DNA binding [GO:0003677]; DNA-binding transcription factor activity, RNA polymerase II-specific [GO:0000981]; zinc ion binding [GO:0008270]
EN45_085380	2.558	1.568	4.853e-06	2.993e-05	A0A162CP51_PENCH	Tubulin alpha chain	448	GO:0005200; GO:0005525; GO:0005874; GO:0007017	microtubule-based process [GO:0007017]	microtubule [GO:0005874]	GTP binding [GO:0005525]; structural constituent of cytoskeleton [GO:0005200]
EN45_051670	2.551	3.681	3.513e-08	9.062e-07	A0A161XVL8_PENCH	Putative ankyrin repeat protein	194
EN45_057260	2.549	4.529	3.655e-07	4.568e-06	A0A167SH97_PENCH	NACHT, LRR and PYD domains-containing protein	1499	GO:0017000; GO:0072330	antibiotic biosynthetic process [GO:0017000]; monocarboxylic acid biosynthetic process [GO:0072330]
EN45_076190	2.548	2.719	8.38e-06	4.597e-05	A0A167U8H1_PENCH	Acetyltransferase	177	GO:0016407			acetyltransferase activity [GO:0016407]
EN45_088560	2.543	4.091	1.427e-07	2.34e-06	A0A167QFY2_PENCH	Mitochondrial carrier protein	346	GO:0016020		membrane [GO:0016020]
EN45_049160	2.532	3.849	1.812e-07	2.773e-06	A0A167RSP5_PENCH	Uncharacterized protein	329	GO:0016020		membrane [GO:0016020]
EN45_049640	2.532	3.941	2.205e-08	6.738e-07	A0A167RTX6_PENCH	Uncharacterized protein	365
EN45_060680	2.532	0.7428	8.755e-05	0.0003025	A0A167ST18_PENCH	C2H2-type domain-containing protein	244	GO:0005634		nucleus [GO:0005634]
EN45_018160	2.527	4.527	2.009e-08	6.314e-07	A0A167WI17_PENCH	Vacuolar iron transporter Ccc1	287	GO:0005384; GO:0016020; GO:0030026	cellular manganese ion homeostasis [GO:0030026]	membrane [GO:0016020]	manganese ion transmembrane transporter activity [GO:0005384]
EN45_039950	2.527	-0.6252	0.0004936	0.001254	A0A167YBM9_PENCH	Acetate permease A	278	GO:0016020		membrane [GO:0016020]
EN45_072780	2.527	6.326	5.34e-08	1.216e-06	A0A167TWT7_PENCH	Similar to	228
EN45_004180	2.524	1.256	7.425e-06	4.183e-05	A0A167VCZ3_PENCH	Sulfite efflux pump	408	GO:0016020; GO:0055085	transmembrane transport [GO:0055085]	membrane [GO:0016020]
EN45_068880	2.522	5.371	2.566e-09	1.847e-07	A0A167TIP8_PENCH	Repetitive proline-rich cell wall protein	1294
EN45_021070	2.514	0.5459	1.457e-05	7.052e-05	A0A167WRE2_PENCH	EB domain-containing protein	290
EN45_087450	2.51	-0.7558	0.001517	0.00328	A0A167QCQ5_PENCH	Putative HECT-type ubiquitin ligase-interacting protein	398	GO:0016874			ligase activity [GO:0016874]
EN45_052640	2.504	5.513	2.9e-10	4.622e-08	A0A167S2X3_PENCH	Putative beta-glucosidase L	736	GO:0000272; GO:0004553; GO:0005576	polysaccharide catabolic process [GO:0000272]	extracellular region [GO:0005576]	hydrolase activity, hydrolyzing O-glycosyl compounds [GO:0004553]
EN45_111660	2.499	2.083	3.716e-05	0.0001499	A0A167PZD4_PENCH	SDR family NAD(P)-dependent oxidoreductase	111
EN45_039610	2.495	5.89	2.747e-09	1.9e-07	A0A167YAQ8_PENCH	Aflatoxin biosynthesis regulatory protein	332	GO:0000981; GO:0003677; GO:0005634; GO:0008270; GO:0045122	aflatoxin biosynthetic process [GO:0045122]	nucleus [GO:0005634]	DNA binding [GO:0003677]; DNA-binding transcription factor activity, RNA polymerase II-specific [GO:0000981]; zinc ion binding [GO:0008270]
EN45_103700	2.495	8.102	9.147e-10	9.106e-08	A0A167RM26_PENCH	Choline-sulfatase	589	GO:0008484			sulfuric ester hydrolase activity [GO:0008484]
EN45_094700	2.494	2.381	1.063e-05	5.529e-05	A0A167QX85_PENCH	Putative transcriptional regulatory protein	776	GO:0000981; GO:0003677; GO:0005634; GO:0008270		nucleus [GO:0005634]	DNA binding [GO:0003677]; DNA-binding transcription factor activity, RNA polymerase II-specific [GO:0000981]; zinc ion binding [GO:0008270]
EN45_071510	2.489	3.341	6.428e-07	6.797e-06	A0A167TSL4_PENCH	F-box domain-containing protein	396
EN45_019830	2.486	3.597	2.703e-07	3.644e-06	A0A167WMN1_PENCH	Similar to	282
EN45_061970	2.485	4.571	2.829e-09	1.9e-07	A0A167SWZ8_PENCH	MARVEL domain-containing protein	167	GO:0016020		membrane [GO:0016020]
EN45_011790	2.483	2.761	1.276e-07	2.172e-06	A0A167VYQ3_PENCH	Putative transcriptional regulatory protein	735	GO:0000981; GO:0003677; GO:0005634; GO:0008270		nucleus [GO:0005634]	DNA binding [GO:0003677]; DNA-binding transcription factor activity, RNA polymerase II-specific [GO:0000981]; zinc ion binding [GO:0008270]
EN45_066200	2.483	10.59	1.393e-08	4.914e-07	A0A167TA88_PENCH	HET-C domain protein HetC	789
EN45_046290	2.478	1.745	1.789e-06	1.412e-05	A0A161XYS9_PENCH	1-aminocyclopropane-1-carboxylate oxidase	334	GO:0016053; GO:0016491; GO:0046872; GO:1901362	organic acid biosynthetic process [GO:0016053]; organic cyclic compound biosynthetic process [GO:1901362]		metal ion binding [GO:0046872]; oxidoreductase activity [GO:0016491]
EN45_079200	2.469	6.103	1.405e-07	2.314e-06	A0A167UJ41_PENCH	USP domain-containing protein	774	GO:0004843; GO:0016579	protein deubiquitination [GO:0016579]		cysteine-type deubiquitinase activity [GO:0004843]
EN45_032530	2.465	12.63	1.921e-09	1.487e-07	A0A167XQ96_PENCH	Heat shock protein	789	GO:0005524; GO:0016887			ATP binding [GO:0005524]; ATP hydrolysis activity [GO:0016887]
EN45_092910	2.465	4.683	1.12e-07	1.976e-06	A0A167QSD5_PENCH	Alpha/beta hydrolase	21
EN45_025070	2.463	-0.4723	0.006749	0.01201	A0A167X312_PENCH	Transposase	741
EN45_080530	2.461	-0.3025	0.00124	0.002761	A0A161ZC48_PENCH	C2H2-type domain-containing protein	526
EN45_045360	2.457	5.938	4.376e-09	2.44e-07	A0A167YNH3_PENCH	Cut12 domain-containing protein	682
EN45_013910	2.456	4.204	8.797e-06	4.793e-05	A0A167W4T0_PENCH	Putative aminotransferase	473	GO:0008483; GO:0030170			pyridoxal phosphate binding [GO:0030170]; transaminase activity [GO:0008483]
EN45_098690	2.455	5.409	1.377e-08	4.896e-07	A0A167R8C9_PENCH	Protein YdcF	267
EN45_001410	2.454	4.189	1.352e-06	1.151e-05	A0A167V5S8_PENCH	Tyrosine-protein phosphatase	316	GO:0004721; GO:0016311	dephosphorylation [GO:0016311]		phosphoprotein phosphatase activity [GO:0004721]
EN45_017230	2.454	4.971	3.1e-07	4.038e-06	A0A167WFC3_PENCH	Glutathione S-transferase	236	GO:0016740			transferase activity [GO:0016740]
EN45_017980	2.452	8.115	8.439e-08	1.616e-06	A0A167WHH6_PENCH	Rick_17kDa_Anti domain-containing protein	275	GO:0019867		outer membrane [GO:0019867]
EN45_101810	2.449	4.189	8.248e-08	1.59e-06	A0A167RHE1_PENCH	Developmental regulatory protein wetA	520	GO:0030435; GO:0048315	conidium formation [GO:0048315]; sporulation resulting in formation of a cellular spore [GO:0030435]
EN45_033460	2.448	9.528	1.86e-07	2.818e-06	A0A167XT44_PENCH	Protein SERAC1	1493	GO:0017000; GO:0043531; GO:0072330	antibiotic biosynthetic process [GO:0017000]; monocarboxylic acid biosynthetic process [GO:0072330]		ADP binding [GO:0043531]
EN45_045720	2.448	-0.2783	0.0002996	0.0008293	A0A167YPU6_PENCH	Tautomerase/MIF	327
EN45_035720	2.441	0.07573	0.0002228	0.0006469	A0A167XZK6_PENCH	Putative transporter	510	GO:0016020; GO:0022857		membrane [GO:0016020]	transmembrane transporter activity [GO:0022857]
EN45_112780	2.441	8.648	8.351e-10	8.768e-08	A0A162CNM7_PENCH	Putative mitochondrial carnitine O-acetyltransferase	1480	GO:0000166; GO:0006631; GO:0016746	fatty acid metabolic process [GO:0006631]		acyltransferase activity [GO:0016746]; nucleotide binding [GO:0000166]
EN45_011540	2.438	2.385	6.629e-07	6.911e-06	B1GVB7_PENCH	Pheromone receptor 1 (Pheromone receptor PcPre1)	469	GO:0004932; GO:0016020		membrane [GO:0016020]	mating-type factor pheromone receptor activity [GO:0004932]
EN45_112570	2.437	5.776	3.511e-09	2.176e-07	A0A162BEH6_PENCH	Sulfatase domain-containing protein	874	GO:0008484; GO:0016020		membrane [GO:0016020]	sulfuric ester hydrolase activity [GO:0008484]
EN45_113610	2.437	-0.5241	0.001754	0.003706	A0A167Q3E7_PENCH	Putative hemerythrin-like protein	238	GO:0055072	iron ion homeostasis [GO:0055072]
EN45_003340	2.434	8.13	4.302e-10	6.399e-08	A0A167VAI2_PENCH	Minor allergen Alt a	201	GO:0003955; GO:0010181			FMN binding [GO:0010181]; NAD(P)H dehydrogenase (quinone) activity [GO:0003955]
EN45_091570	2.43	2.769	7.553e-07	7.565e-06	A0A167QNZ9_PENCH	DUF6536 domain-containing protein	355
EN45_092060	2.43	2.454	9.656e-07	9.059e-06	A0A167QQC2_PENCH	Nuclear fusion protein	517	GO:0000742; GO:0005634; GO:0016020; GO:0048288	karyogamy involved in conjugation with cellular fusion [GO:0000742]; nuclear membrane fusion involved in karyogamy [GO:0048288]	membrane [GO:0016020]; nucleus [GO:0005634]
EN45_012700	2.418	3.191	9.708e-08	1.79e-06	A0A167W171_PENCH	CFEM domain-containing protein	613	GO:0005886		plasma membrane [GO:0005886]
EN45_003120	2.417	7.023	4.362e-06	2.757e-05	A0A167V9Z6_PENCH	Similar to	56
EN45_039320	2.417	1.325	3.744e-06	2.466e-05	A0A161ZMI8_PENCH	Eugenol synthase	309
EN45_076210	2.41	1.868	1.796e-06	1.415e-05	A0A167U8K9_PENCH	Putative dioxygenase	370	GO:0051213			dioxygenase activity [GO:0051213]
EN45_094680	2.409	8.851	1.596e-08	5.414e-07	A0A167QX71_PENCH	beta-glucosidase (EC 3.2.1.21)	869	GO:0005576; GO:0008422; GO:0030245; GO:0102483	cellulose catabolic process [GO:0030245]	extracellular region [GO:0005576]	beta-glucosidase activity [GO:0008422]; scopolin beta-glucosidase activity [GO:0102483]
EN45_000160	2.408	2.214	1.744e-06	1.386e-05	A0A167V1P8_PENCH	transketolase (EC 2.2.1.1)	711	GO:0004802; GO:0009117; GO:0046872	nucleotide metabolic process [GO:0009117]		metal ion binding [GO:0046872]; transketolase activity [GO:0004802]
EN45_088630	2.405	-0.295	0.002176	0.004457	A0A167QG62_PENCH	DUF1552 domain-containing protein	252
EN45_085200	2.401	8.37	2.171e-06	1.623e-05	A0A167V100_PENCH	Hydrophobin	140	GO:0005199; GO:0005576; GO:0009277		extracellular region [GO:0005576]; fungal-type cell wall [GO:0009277]	structural constituent of cell wall [GO:0005199]
EN45_085680	2.401	1.634	0.001979	0.004109	A0A162CPA1_PENCH	ABC transporter	1463	GO:0005524; GO:0005886; GO:0140359		plasma membrane [GO:0005886]	ABC-type transporter activity [GO:0140359]; ATP binding [GO:0005524]
EN45_023040	2.395	4.425	6.794e-08	1.407e-06	A0A167WX06_PENCH	Riboflavin transporter	494	GO:0016020; GO:0022857		membrane [GO:0016020]	transmembrane transporter activity [GO:0022857]
EN45_072220	2.39	0.2796	9.867e-05	0.000332	A0A167TUV8_PENCH	Fucose-specific lectin	306	GO:0030246			carbohydrate binding [GO:0030246]
EN45_088340	2.387	5.054	1.54e-07	2.46e-06	A0A162C0D8_PENCH	Putative beta-glucosidase G	864	GO:0000272; GO:0004553; GO:0005576	polysaccharide catabolic process [GO:0000272]	extracellular region [GO:0005576]	hydrolase activity, hydrolyzing O-glycosyl compounds [GO:0004553]
EN45_040250	2.385	1.934	6.386e-06	3.717e-05	A0A167YCD4_PENCH	Phage protein	117
EN45_045230	2.384	2.632	4.249e-06	2.703e-05	A0A161ZNR5_PENCH	Protein TolB	673	GO:0006508; GO:0008236	proteolysis [GO:0006508]		serine-type peptidase activity [GO:0008236]
EN45_003690	2.383	3.108	3.896e-07	4.776e-06	A0A167VBH5_PENCH	Aldehyde dehydrogenase	381	GO:0016620			oxidoreductase activity, acting on the aldehyde or oxo group of donors, NAD or NADP as acceptor [GO:0016620]
EN45_076270	2.383	4.592	7.692e-08	1.515e-06	A0A167U8S9_PENCH	N-acetyltransferase domain-containing protein	254	GO:0016407			acetyltransferase activity [GO:0016407]
EN45_023160	2.382	4.43	1.084e-06	9.857e-06	A0A161ZIR2_PENCH	Uncharacterized protein	157	GO:0006479	protein methylation [GO:0006479]
EN45_032000	2.38	1.247	1.217e-05	6.116e-05	A0A167XNM9_PENCH	Bac_rhamnosid6H domain-containing protein	792	GO:0005975; GO:0016787	carbohydrate metabolic process [GO:0005975]		hydrolase activity [GO:0016787]
EN45_095810	2.379	4.36	3.62e-08	9.256e-07	A0A167R0A7_PENCH	Isotrichodermin C-15 hydroxylase	490	GO:0004497; GO:0005506; GO:0016705; GO:0020037; GO:0030639; GO:0043386; GO:1901336; GO:1901617	lactone biosynthetic process [GO:1901336]; mycotoxin biosynthetic process [GO:0043386]; organic hydroxy compound biosynthetic process [GO:1901617]; polyketide biosynthetic process [GO:0030639]		heme binding [GO:0020037]; iron ion binding [GO:0005506]; monooxygenase activity [GO:0004497]; oxidoreductase activity, acting on paired donors, with incorporation or reduction of molecular oxygen [GO:0016705]
EN45_027920	2.368	6.478	3.071e-07	4.019e-06	A0A167XBH8_PENCH	Endonuclease (EC 3.1.30.-)	327	GO:0003676; GO:0004519; GO:0046872			endonuclease activity [GO:0004519]; metal ion binding [GO:0046872]; nucleic acid binding [GO:0003676]
EN45_070020	2.364	3.144	3.933e-07	4.802e-06	A0A167TMM0_PENCH	DNA mismatch repair protein	764	GO:0000710; GO:0005524; GO:0005634; GO:0016887; GO:0030983; GO:0032300; GO:0140664	meiotic mismatch repair [GO:0000710]	mismatch repair complex [GO:0032300]; nucleus [GO:0005634]	ATP binding [GO:0005524]; ATP hydrolysis activity [GO:0016887]; ATP-dependent DNA damage sensor activity [GO:0140664]; mismatched DNA binding [GO:0030983]
EN45_069100	2.358	2.372	4.148e-05	0.0001641	A0A167TJB4_PENCH	Integral membrane protein	369	GO:0016020		membrane [GO:0016020]
EN45_107080	2.358	2.852	1.998e-06	1.523e-05	A0A167PPF8_PENCH	Kinetochore protein	568
EN45_022480	2.357	5.948	1.041e-07	1.893e-06	A0A167WVF6_PENCH	Glycosyl hydrolase	573	GO:0005975	carbohydrate metabolic process [GO:0005975]
EN45_068440	2.357	0.5414	0.0001425	0.0004489	A0A167THA0_PENCH	Sugar transporter SWEET1	75
EN45_080880	2.355	4.028	5.65e-08	1.26e-06	A0A167UPG5_PENCH	RING-type domain-containing protein	544
EN45_110710	2.354	7.123	3.116e-08	8.401e-07	A7KAN6_PENCH	Atg28p	460
EN45_049630	2.353	5.159	4.57e-09	2.502e-07	A0A167RTW7_PENCH	Tubby C-terminal-like domain-containing protein	217
EN45_001420	2.35	1.035	2.859e-05	0.0001218	A0A167V5T7_PENCH	beta-galactosidase (EC 3.2.1.23)	982	GO:0004565; GO:0005576; GO:0005975	carbohydrate metabolic process [GO:0005975]	extracellular region [GO:0005576]	beta-galactosidase activity [GO:0004565]
EN45_019410	2.347	7.711	2.824e-09	1.9e-07	A0A167WLI3_PENCH	pH-response transcription factor pacC/RIM101	643	GO:0005634		nucleus [GO:0005634]
EN45_094370	2.346	2.292	2.001e-05	9.101e-05	A0A162C1W9_PENCH	Integrase catalytic domain-containing protein	402
EN45_066260	2.343	4.287	1.054e-08	4.091e-07	A0A167TAF6_PENCH	Sister chromatid cohesion protein Dcc1	396	GO:0006260; GO:0007064; GO:0031390	DNA replication [GO:0006260]; mitotic sister chromatid cohesion [GO:0007064]	Ctf18 RFC-like complex [GO:0031390]
EN45_041480	2.341	2.689	1.451e-06	1.207e-05	A0A169XDH7_PENCH	MELPH protein	140
EN45_045010	2.336	0.831	3.028e-05	0.0001274	A0A167YMH5_PENCH	Putative acyl-CoA dehydrogenase YdiO	423	GO:0016627; GO:0050660			flavin adenine dinucleotide binding [GO:0050660]; oxidoreductase activity, acting on the CH-CH group of donors [GO:0016627]
EN45_082130	2.329	0.6905	0.001406	0.003062	A0A167UST8_PENCH	Putative NADPH-dependent methylglyoxal reductase	347	GO:0003854; GO:0006694	steroid biosynthetic process [GO:0006694]		3-beta-hydroxy-delta5-steroid dehydrogenase activity [GO:0003854]
EN45_001310	2.326	4.567	2.867e-08	8.046e-07	A0A167V5G8_PENCH	Putative ATP-dependent helicase	1479	GO:0004386; GO:0005524; GO:0005634; GO:0016787; GO:0019538; GO:0046872; GO:0140658	protein metabolic process [GO:0019538]	nucleus [GO:0005634]	ATP binding [GO:0005524]; ATP-dependent chromatin remodeler activity [GO:0140658]; helicase activity [GO:0004386]; hydrolase activity [GO:0016787]; metal ion binding [GO:0046872]
EN45_076150	2.326	4.856	5.36e-09	2.7e-07	A0A167U8C2_PENCH	MARVEL domain-containing protein	201	GO:0016020		membrane [GO:0016020]
EN45_019000	2.312	1.22	1.515e-05	7.265e-05	A0A167WKC3_PENCH	Norsolorinic acid ketoreductase	248
EN45_075080	2.312	-0.4793	0.002987	0.005888	A0A167U4P7_PENCH	GST N-terminal domain-containing protein	227
EN45_056150	2.311	0.7166	0.0001369	0.0004333	A0A167SE60_PENCH	Glycosyl transferase	2873	GO:0016020		membrane [GO:0016020]
EN45_087200	2.31	4.426	9.408e-09	3.834e-07	A0A167QBZ7_PENCH	PMS1 protein-like protein	892	GO:0000710; GO:0003916; GO:0005524; GO:0016887; GO:0030983; GO:0032300; GO:0140664	meiotic mismatch repair [GO:0000710]	mismatch repair complex [GO:0032300]	ATP binding [GO:0005524]; ATP hydrolysis activity [GO:0016887]; ATP-dependent DNA damage sensor activity [GO:0140664]; DNA topoisomerase activity [GO:0003916]; mismatched DNA binding [GO:0030983]
EN45_075540	2.306	6.901	9.702e-09	3.9e-07	A0A167U672_PENCH	C2H2-type domain-containing protein	547
EN45_069880	2.304	0.2046	0.01132	0.01897	A0A167TLX7_PENCH	Alpha-ketoglutarate-dependent taurine dioxygenase	367	GO:0051213			dioxygenase activity [GO:0051213]
EN45_003380	2.301	7.971	5.59e-09	2.711e-07	A0A167VAM3_PENCH	Vegetative incompatibility protein HET-E-1	1411
EN45_019300	2.3	2.309	3.191e-06	2.18e-05	A0A167WL69_PENCH	Meth_synt_2 domain-containing protein	402	GO:0003871; GO:0008270; GO:0009086	methionine biosynthetic process [GO:0009086]		5-methyltetrahydropteroyltriglutamate-homocysteine S-methyltransferase activity [GO:0003871]; zinc ion binding [GO:0008270]
EN45_029870	2.298	6.814	2.017e-08	6.316e-07	A0A167XHB3_PENCH	Putative kinase	341	GO:0016301; GO:0016310	phosphorylation [GO:0016310]		kinase activity [GO:0016301]
EN45_001080	2.289	5.795	2.753e-08	7.799e-07	A0A167V4T5_PENCH	Peroxin-5	212
EN45_019380	2.287	5.878	4.869e-08	1.138e-06	A0A161ZHW5_PENCH	High-affinity glucose transporter	523	GO:0008643; GO:0016020; GO:0022857	carbohydrate transport [GO:0008643]	membrane [GO:0016020]	transmembrane transporter activity [GO:0022857]
EN45_067780	2.287	5.277	1.933e-08	6.183e-07	A0A167TFC7_PENCH	DNA repair protein	1220	GO:0003676; GO:0005524; GO:0005634; GO:0008270; GO:0016818; GO:0140658		nucleus [GO:0005634]	ATP binding [GO:0005524]; ATP-dependent chromatin remodeler activity [GO:0140658]; hydrolase activity, acting on acid anhydrides, in phosphorus-containing anhydrides [GO:0016818]; nucleic acid binding [GO:0003676]; zinc ion binding [GO:0008270]
EN45_039590	2.284	5.19	1.63e-06	1.321e-05	A0A167YAP2_PENCH	Abnormal spindle microtubule assembly	300
EN45_024520	2.282	5.181	1.918e-08	6.156e-07	A0A167X1D3_PENCH	Chanoclavine-I aldehyde reductase	368	GO:0010181; GO:0016491			FMN binding [GO:0010181]; oxidoreductase activity [GO:0016491]
EN45_045300	2.281	8.05	3.647e-08	9.298e-07	A0A167YND1_PENCH	Uncharacterized protein	1725
EN45_040560	2.28	6.721	1.294e-06	1.112e-05	A0A169X9A7_PENCH	PHO85 cyclin-1	412	GO:0000079; GO:0019901	regulation of cyclin-dependent protein serine/threonine kinase activity [GO:0000079]		protein kinase binding [GO:0019901]
EN45_033150	2.276	6.172	1.306e-07	2.194e-06	A0A167XS39_PENCH	ribonuclease T2 (EC 4.6.1.19)	418	GO:0003723; GO:0033897			ribonuclease T2 activity [GO:0033897]; RNA binding [GO:0003723]
EN45_058320	2.276	0.5377	0.0003684	0.000989	A0A167SJZ4_PENCH	C2H2-type domain-containing protein	222	GO:0005634		nucleus [GO:0005634]
EN45_037760	2.273	-0.05904	0.0004614	0.001186	A0A167Y5C0_PENCH	Sterol 3-beta-glucosyltransferase	812	GO:0005975; GO:0008194; GO:0016758; GO:0030259	carbohydrate metabolic process [GO:0005975]; lipid glycosylation [GO:0030259]		hexosyltransferase activity [GO:0016758]; UDP-glycosyltransferase activity [GO:0008194]
EN45_076700	2.273	5.376	1.301e-07	2.194e-06	A0A167UAC2_PENCH	Antigenic thaumatin-like protein	157
EN45_016540	2.272	1.963	3.581e-05	0.000146	A0A167WD98_PENCH	Brefeldin A resistance protein	1354	GO:0005524; GO:0016020; GO:0140359		membrane [GO:0016020]	ABC-type transporter activity [GO:0140359]; ATP binding [GO:0005524]
EN45_070980	2.268	6.746	4.972e-10	6.634e-08	A0A167TQV2_PENCH	Succinyl-CoA-L-malate CoA-transferase beta subunit	572	GO:0016740			transferase activity [GO:0016740]
EN45_083470	2.267	0.626	0.0003879	0.001033	A0A161ZCT5_PENCH	Phage protein	124
EN45_028520	2.265	5.936	1.073e-07	1.936e-06	A0A167XD70_PENCH	Putative transporter	518	GO:0016020; GO:0022857		membrane [GO:0016020]	transmembrane transporter activity [GO:0022857]
EN45_039430	2.264	3.088	3.463e-05	0.000142	A0A167YA93_PENCH	Putative acyl-CoA synthetase YngI	967	GO:0017000; GO:0018130; GO:0031177; GO:0044550; GO:0072330; GO:1901362	antibiotic biosynthetic process [GO:0017000]; heterocycle biosynthetic process [GO:0018130]; monocarboxylic acid biosynthetic process [GO:0072330]; organic cyclic compound biosynthetic process [GO:1901362]; secondary metabolite biosynthetic process [GO:0044550]		phosphopantetheine binding [GO:0031177]
EN45_000340	2.262	3.865	2.447e-08	7.279e-07	A0A167V269_PENCH	Nucleoside-diphosphate-sugar epimerase	254
EN45_111890	2.26	0.6348	0.0001	0.0003359	A0A167PZQ0_PENCH	BRCT domain-containing protein	346
EN45_114540	2.26	4.705	1.321e-08	4.755e-07	A0A167Q585_PENCH	Carboxylic ester hydrolase (EC 3.1.1.-)	575	GO:0016020; GO:0016787; GO:0017000; GO:0072330	antibiotic biosynthetic process [GO:0017000]; monocarboxylic acid biosynthetic process [GO:0072330]	membrane [GO:0016020]	hydrolase activity [GO:0016787]
EN45_077450	2.259	5.818	2.576e-09	1.847e-07	A0A167UD23_PENCH	Tryptophan dimethylallyltransferase	391	GO:0009820; GO:0016765	alkaloid metabolic process [GO:0009820]		transferase activity, transferring alkyl or aryl (other than methyl) groups [GO:0016765]
EN45_025610	2.255	1.382	1.71e-05	7.997e-05	A0A161ZJC0_PENCH	Protein kinase domain-containing protein	172
EN45_058890	2.253	3.207	1.71e-07	2.654e-06	A0A167SLQ7_PENCH	Ovule protein	76
EN45_081110	2.253	8.549	1.149e-07	2.014e-06	A0A167UQ45_PENCH	PHD and RING finger domain-containing protein	606	GO:0046872			metal ion binding [GO:0046872]
EN45_056240	2.251	4.462	1.152e-07	2.016e-06	A0A167SEF1_PENCH	Uncharacterized protein	90
EN45_098970	2.251	0.2561	0.01438	0.02347	A0A167R921_PENCH	Low-affinity potassium transport protein	307	GO:0006813; GO:0008324; GO:0016020	potassium ion transport [GO:0006813]	membrane [GO:0016020]	cation transmembrane transporter activity [GO:0008324]
EN45_015220	2.248	-0.1842	0.001046	0.002379	A0A167W8T1_PENCH	Meiotic coiled-coil protein	826	GO:0003723; GO:0005730		nucleolus [GO:0005730]	RNA binding [GO:0003723]
EN45_041060	2.244	2.03	6.127e-06	3.593e-05	A0A169XC79_PENCH	Non-reducing end alpha-L-arabinofuranosidase	543	GO:0004553; GO:0005975	carbohydrate metabolic process [GO:0005975]		hydrolase activity, hydrolyzing O-glycosyl compounds [GO:0004553]
EN45_112240	2.241	1.146	3.026e-05	0.0001274	A0A161Z427_PENCH	Death domain-containing protein	129
EN45_030900	2.238	7.07	6.231e-09	2.942e-07	A0A167XKH2_PENCH	CHORD domain-containing protein	56
EN45_046140	2.236	0.0911	0.0005151	0.0013	A0A161ZNX0_PENCH	BZIP domain-containing protein	165
EN45_074450	2.229	0.0585	0.0001257	0.0004038	A0A167U2J6_PENCH	3-dehydroshikimate dehydratase	331
EN45_045120	2.228	2.527	1.642e-06	1.326e-05	A0A167YMT8_PENCH	DUF3445 domain-containing protein	322
EN45_060020	2.226	1.306	0.0002683	0.0007576	A0A167SQC0_PENCH	Sterol 14-alpha demethylase	496	GO:0004497; GO:0005506; GO:0008168; GO:0016705; GO:0020037; GO:0030639; GO:0032259; GO:0043386; GO:1901336; GO:1901617	lactone biosynthetic process [GO:1901336]; methylation [GO:0032259]; mycotoxin biosynthetic process [GO:0043386]; organic hydroxy compound biosynthetic process [GO:1901617]; polyketide biosynthetic process [GO:0030639]		heme binding [GO:0020037]; iron ion binding [GO:0005506]; methyltransferase activity [GO:0008168]; monooxygenase activity [GO:0004497]; oxidoreductase activity, acting on paired donors, with incorporation or reduction of molecular oxygen [GO:0016705]
EN45_003700	2.225	3.529	4.182e-06	2.683e-05	A0A167VBI7_PENCH	DUF1275 domain protein	249	GO:0016020		membrane [GO:0016020]
EN45_043390	2.223	1.367	0.0001107	0.0003644	A0A167YI36_PENCH	FAD-binding FR-type domain-containing protein	518	GO:0016020; GO:0016491		membrane [GO:0016020]	oxidoreductase activity [GO:0016491]
EN45_003100	2.215	3.296	4.416e-08	1.057e-06	A0A161ZE40_PENCH	RRM domain-containing protein	396	GO:0003723			RNA binding [GO:0003723]
EN45_040660	2.215	2.018	9.267e-05	0.0003159	A0A169X9K2_PENCH	15-hydroxyprostaglandin dehydrogenase	278	GO:0016491			oxidoreductase activity [GO:0016491]
EN45_080100	2.214	2.179	2.935e-06	2.053e-05	A0A167ULZ8_PENCH	Uncharacterized protein	148
EN45_087660	2.214	6.483	2.394e-08	7.179e-07	A0A167QDD7_PENCH	Quinate permease	555	GO:0016020; GO:0022857		membrane [GO:0016020]	transmembrane transporter activity [GO:0022857]
EN45_058090	2.212	0.5249	0.0002348	0.0006766	A0A167SJE9_PENCH	Zn(2)-C6 fungal-type domain-containing protein	408	GO:0000981; GO:0003677; GO:0005634; GO:0008270; GO:0045944	positive regulation of transcription by RNA polymerase II [GO:0045944]	nucleus [GO:0005634]	DNA binding [GO:0003677]; DNA-binding transcription factor activity, RNA polymerase II-specific [GO:0000981]; zinc ion binding [GO:0008270]
EN45_114690	2.212	1.939	1.039e-05	5.421e-05	A0A167Q5K4_PENCH	Phospholipase A1	144
EN45_080000	2.21	1.321	6.827e-05	0.0002449	A0A167ULU0_PENCH	Ornithine decarboxylase	429	GO:0003824; GO:0006596	polyamine biosynthetic process [GO:0006596]		catalytic activity [GO:0003824]
EN45_017990	2.207	2.574	9.049e-05	0.0003101	A0A167WHI9_PENCH	HTH CENPB-type domain-containing protein	214
EN45_034000	2.206	3.103	1.23e-06	1.07e-05	A0A161ZLD4_PENCH	Altered inheritance of mitochondria protein	534
EN45_057960	2.206	0.3836	0.0001546	0.0004812	A0A167SJ13_PENCH	Putative ariadne-like RING finger protein	922
EN45_027910	2.205	5.346	6.532e-08	1.377e-06	A0A167XBF9_PENCH	Nitric oxide synthase-interacting protein-like protein	379	GO:0005634; GO:0046872; GO:0061630		nucleus [GO:0005634]	metal ion binding [GO:0046872]; ubiquitin protein ligase activity [GO:0061630]
EN45_037900	2.204	2.27	2.945e-06	2.056e-05	A0A161ZM91_PENCH	Regulator of nonsense transcripts 1-like protein	1183	GO:0004386			helicase activity [GO:0004386]
EN45_053240	2.2	2.311	2.37e-06	1.737e-05	A0A167S4P9_PENCH	Uncharacterized protein	250
EN45_088350	2.194	6.024	5.002e-09	2.657e-07	A0A167QFD3_PENCH	Putative isochorismatase family protein	199
EN45_073970	2.193	3.559	3.898e-05	0.0001554	A0A167U142_PENCH	Fungal_trans domain-containing protein	668	GO:0003677; GO:0006351; GO:0008270	DNA-templated transcription [GO:0006351]		DNA binding [GO:0003677]; zinc ion binding [GO:0008270]
EN45_002310	2.191	2.617	8.72e-07	8.385e-06	A0A167V7U9_PENCH	Coiled-coil domain-containing protein 153	247
EN45_109200	2.179	6.637	8.895e-09	3.668e-07	A0A167PTT0_PENCH	Canalicular multispecific organic anion transporter	1471	GO:0005524; GO:0016020; GO:0140359		membrane [GO:0016020]	ABC-type transporter activity [GO:0140359]; ATP binding [GO:0005524]
EN45_075730	2.172	2.648	1.417e-06	1.191e-05	A0A167U6X5_PENCH	Benzoate 4-monooxygenase	533	GO:0004497; GO:0005506; GO:0016020; GO:0016705; GO:0020037; GO:0030639; GO:0043386; GO:1901336; GO:1901617	lactone biosynthetic process [GO:1901336]; mycotoxin biosynthetic process [GO:0043386]; organic hydroxy compound biosynthetic process [GO:1901617]; polyketide biosynthetic process [GO:0030639]	membrane [GO:0016020]	heme binding [GO:0020037]; iron ion binding [GO:0005506]; monooxygenase activity [GO:0004497]; oxidoreductase activity, acting on paired donors, with incorporation or reduction of molecular oxygen [GO:0016705]
EN45_087610	2.17	0.6986	0.0001295	0.000414	A0A162CPM1_PENCH	RabBD domain-containing protein	213
EN45_045500	2.167	1.664	3.455e-06	2.317e-05	A0A167YP30_PENCH	beta-galactosidase (EC 3.2.1.23)	1013	GO:0004565; GO:0005576; GO:0005975	carbohydrate metabolic process [GO:0005975]	extracellular region [GO:0005576]	beta-galactosidase activity [GO:0004565]
EN45_076030	2.164	6.844	2.668e-08	7.728e-07	A0A167U7X1_PENCH	Nonsense-mediated decay protein	420
EN45_018740	2.163	7.55	5.472e-09	2.7e-07	A0A167WJP2_PENCH	sterol 3beta-glucosyltransferase (EC 2.4.1.173) (Autophagy-related protein 26)	1374	GO:0005975; GO:0006914; GO:0015031; GO:0016906; GO:0030259; GO:0034045; GO:0102202; GO:0102203; GO:0102205	autophagy [GO:0006914]; carbohydrate metabolic process [GO:0005975]; lipid glycosylation [GO:0030259]; protein transport [GO:0015031]	phagophore assembly site membrane [GO:0034045]	brassicasterol glucosyltransferase activity [GO:0102203]; cholesterol alpha-glucosyltransferase activity [GO:0102205]; soladodine glucosyltransferase activity [GO:0102202]; sterol 3-beta-glucosyltransferase activity [GO:0016906]
EN45_014400	2.161	2.05	1.425e-06	1.195e-05	A0A167W6A1_PENCH	Putative nitroreductase	264	GO:0016657; GO:0034599	cellular response to oxidative stress [GO:0034599]		oxidoreductase activity, acting on NAD(P)H, nitrogenous group as acceptor [GO:0016657]
EN45_006790	2.159	4.8	1.68e-06	1.353e-05	A0A167VI44_PENCH	Catalase (EC 1.11.1.6)	501	GO:0004096; GO:0006979; GO:0009820; GO:0020037; GO:0042744; GO:0046872	alkaloid metabolic process [GO:0009820]; hydrogen peroxide catabolic process [GO:0042744]; response to oxidative stress [GO:0006979]		catalase activity [GO:0004096]; heme binding [GO:0020037]; metal ion binding [GO:0046872]
EN45_040670	2.159	2.553	8.064e-05	0.0002823	A0A169X9L4_PENCH	Zn(2)-C6 fungal-type domain-containing protein	482	GO:0000981; GO:0003677; GO:0005634; GO:0008270; GO:0045944	positive regulation of transcription by RNA polymerase II [GO:0045944]	nucleus [GO:0005634]	DNA binding [GO:0003677]; DNA-binding transcription factor activity, RNA polymerase II-specific [GO:0000981]; zinc ion binding [GO:0008270]
EN45_090660	2.159	1.672	0.0001312	0.0004186	A0A167QLG3_PENCH	Ankyrin repeat domain-containing protein	342
EN45_053050	2.154	0.9549	0.0008801	0.002048	A0A167S4B4_PENCH	Secreted protein	278
EN45_063590	2.153	1.839	1.615e-05	7.635e-05	A0A167T1V7_PENCH	Retrovirus-related Pol polyprotein from transposon TNT	705	GO:0003676			nucleic acid binding [GO:0003676]
EN45_071390	2.153	4.567	8.12e-08	1.579e-06	A0A167TS79_PENCH	Quinate permease	523	GO:0016020; GO:0022857		membrane [GO:0016020]	transmembrane transporter activity [GO:0022857]
EN45_105230	2.149	4.052	9.068e-08	1.704e-06	A0A167PKM0_PENCH	Putative peptide transporter	632	GO:0006857; GO:0016020; GO:0022857	oligopeptide transport [GO:0006857]	membrane [GO:0016020]	transmembrane transporter activity [GO:0022857]
EN45_087070	2.148	5.238	5.56e-09	2.711e-07	A0A167QBM8_PENCH	Fungal-specific transcription factor domain-containing protein	388
EN45_049920	2.146	5.655	6.275e-09	2.947e-07	A0A167RUN6_PENCH	F-box domain-containing protein	524
EN45_113200	2.142	3.48	1.027e-07	1.878e-06	A0A162CNQ8_PENCH	NAD(P)-bd_dom domain-containing protein	323
EN45_047990	2.135	4.01	1.484e-05	7.135e-05	A0A161XUT0_PENCH	Dihydromonacolin L monooxygenase LovA	382	GO:0004497; GO:0005506; GO:0016705; GO:0020037; GO:0030639; GO:0043386; GO:1901336; GO:1901617	lactone biosynthetic process [GO:1901336]; mycotoxin biosynthetic process [GO:0043386]; organic hydroxy compound biosynthetic process [GO:1901617]; polyketide biosynthetic process [GO:0030639]		heme binding [GO:0020037]; iron ion binding [GO:0005506]; monooxygenase activity [GO:0004497]; oxidoreductase activity, acting on paired donors, with incorporation or reduction of molecular oxygen [GO:0016705]
EN45_097120	2.134	4.579	1.164e-07	2.032e-06	A0A167R3W1_PENCH	Dienelactone hydrolase	473
EN45_032950	2.129	3.969	9.095e-06	4.916e-05	A0A161ZL57_PENCH	APH domain-containing protein	346
EN45_069650	2.127	4.082	2.805e-06	1.979e-05	A0A167TL35_PENCH	Histidine phosphatase superfamily	574	GO:0016020		membrane [GO:0016020]
EN45_005640	2.125	6.078	1.492e-09	1.256e-07	A0A161ZET5_PENCH	Arabinanolytic transcriptional activator araR	835	GO:0000981; GO:0003677; GO:0005634; GO:0008270		nucleus [GO:0005634]	DNA binding [GO:0003677]; DNA-binding transcription factor activity, RNA polymerase II-specific [GO:0000981]; zinc ion binding [GO:0008270]
EN45_039420	2.124	3.23	7.837e-06	4.36e-05	A0A161ZMJ1_PENCH	1-aminocyclopropane-1-carboxylate oxidase	260
EN45_041590	2.124	4.363	1.667e-06	1.345e-05	A0A167YDA5_PENCH	FAD-binding FR-type domain-containing protein	429	GO:0016020; GO:0016491		membrane [GO:0016020]	oxidoreductase activity [GO:0016491]
EN45_017080	2.123	7.877	1.158e-09	1.065e-07	A0A167WEZ1_PENCH	Protein TOXD	345	GO:0016491			oxidoreductase activity [GO:0016491]
EN45_085040	2.122	7.134	9.664e-07	9.059e-06	A0A167V0L0_PENCH	Cyanamide hydratase	248
EN45_048560	2.121	8.621	1.223e-08	4.587e-07	A0A167RR10_PENCH	CLN3 protein-domain-containing protein	1211	GO:0005773; GO:0016020; GO:0016787; GO:0017000; GO:0072330	antibiotic biosynthetic process [GO:0017000]; monocarboxylic acid biosynthetic process [GO:0072330]	membrane [GO:0016020]; vacuole [GO:0005773]	hydrolase activity [GO:0016787]
EN45_003540	2.12	1.277	2.477e-05	0.0001086	A0A167VB35_PENCH	Gag_p10 domain-containing protein	90
EN45_086620	2.119	1.066	9.799e-05	0.0003304	A0A167QAG2_PENCH	DUF3700 domain-containing protein	315
EN45_059490	2.11	5.031	6.301e-08	1.358e-06	A0A167SNE7_PENCH	DUF3108 domain-containing protein	262
EN45_049900	2.109	4.499	4.259e-07	5.075e-06	A0A167RUL3_PENCH	Putative DNA glycosylase	513	GO:0000702; GO:0006285	base-excision repair, AP site formation [GO:0006285]		oxidized base lesion DNA N-glycosylase activity [GO:0000702]
EN45_077480	2.109	7.76	8.92e-09	3.668e-07	A0A167UD51_PENCH	6-hydroxynicotinate 3-monooxygenase	463	GO:0004497; GO:0044550; GO:0071949	secondary metabolite biosynthetic process [GO:0044550]		FAD binding [GO:0071949]; monooxygenase activity [GO:0004497]
EN45_026520	2.106	1.329	2.621e-05	0.0001134	A0A167X7C5_PENCH	Trans-3-hydroxy-L-proline dehydratase	348
EN45_089260	2.104	8.312	2.889e-09	1.9e-07	A0A167QHU7_PENCH	High-affinity glucose transporter	574	GO:0008643; GO:0016020; GO:0022857	carbohydrate transport [GO:0008643]	membrane [GO:0016020]	transmembrane transporter activity [GO:0022857]
EN45_067800	2.103	7.702	8.021e-08	1.564e-06	A0A167TFF5_PENCH	GTP-binding protein	626	GO:0003924; GO:0005525			GTP binding [GO:0005525]; GTPase activity [GO:0003924]
EN45_056500	2.101	4.452	2.258e-08	6.831e-07	A0A167SF22_PENCH	Sphingomyelin phosphodiesterase	658	GO:0016787			hydrolase activity [GO:0016787]
EN45_077160	2.1	2.684	3.708e-06	2.455e-05	A0A167UC08_PENCH	Protein kinase domain-containing protein	244
EN45_098750	2.099	7.874	1.944e-09	1.487e-07	A0A161XTD3_PENCH	Charged multivesicular body protein	216	GO:0007034	vacuolar transport [GO:0007034]
EN45_111540	2.099	7.258	1.777e-09	1.391e-07	A0A161Z3V8_PENCH	Serine/threonine-protein phosphatase 2A activator (EC 5.2.1.8) (Phosphotyrosyl phosphatase activator)	419	GO:0003755; GO:0005737; GO:0019211		cytoplasm [GO:0005737]	peptidyl-prolyl cis-trans isomerase activity [GO:0003755]; phosphatase activator activity [GO:0019211]
EN45_018400	2.097	8.706	4.076e-09	2.362e-07	A0A167WIP9_PENCH	Putative RNA-binding protein	849	GO:0003723			RNA binding [GO:0003723]
EN45_067850	2.094	7.809	1.777e-07	2.74e-06	A0A167TFJ2_PENCH	LDB19 domain-containing protein	542
EN45_041040	2.092	0.6674	0.000119	0.000387	A0A161ZMW3_PENCH	Lactose permease	505	GO:0016020; GO:0022857		membrane [GO:0016020]	transmembrane transporter activity [GO:0022857]
EN45_043470	2.091	3.045	1.933e-07	2.899e-06	A0A167YI99_PENCH	APH domain-containing protein	281
EN45_082510	2.09	0.3661	0.004221	0.007961	A0A161ZCL2_PENCH	Secreted protein	119
EN45_105250	2.088	3.974	4.135e-06	2.666e-05	A0A162BCW8_PENCH	50S ribosomal protein L23	128
EN45_111230	2.082	0.8878	0.0002027	0.000598	A0A167PYF0_PENCH	Nudix hydrolase domain-containing protein	166
EN45_101110	2.08	7.243	3.465e-08	8.99e-07	A0A167RFD8_PENCH	Autophagy-related protein 9	948	GO:0000139; GO:0005789; GO:0006869; GO:0006914; GO:0030659; GO:0034045	autophagy [GO:0006914]; lipid transport [GO:0006869]	cytoplasmic vesicle membrane [GO:0030659]; endoplasmic reticulum membrane [GO:0005789]; Golgi membrane [GO:0000139]; phagophore assembly site membrane [GO:0034045]
EN45_110110	2.079	2.889	1.101e-06	9.966e-06	A0A162BDY2_PENCH	Integral membrane protein	343	GO:0016020		membrane [GO:0016020]
EN45_097200	2.076	5.616	1.76e-08	5.818e-07	A0A167R432_PENCH	Beta-glucuronidase	533	GO:0005576		extracellular region [GO:0005576]
EN45_098150	2.076	4.302	8.227e-08	1.59e-06	A0A167R6R8_PENCH	Benzoate 4-monooxygenase	527	GO:0004497; GO:0005506; GO:0016020; GO:0016705; GO:0020037; GO:0030639; GO:0043386; GO:1901336; GO:1901617	lactone biosynthetic process [GO:1901336]; mycotoxin biosynthetic process [GO:0043386]; organic hydroxy compound biosynthetic process [GO:1901617]; polyketide biosynthetic process [GO:0030639]	membrane [GO:0016020]	heme binding [GO:0020037]; iron ion binding [GO:0005506]; monooxygenase activity [GO:0004497]; oxidoreductase activity, acting on paired donors, with incorporation or reduction of molecular oxygen [GO:0016705]
EN45_101960	2.075	5.059	7.183e-07	7.342e-06	A0A162CSP3_PENCH	Zinc finger protein	509	GO:0003676; GO:0008270			nucleic acid binding [GO:0003676]; zinc ion binding [GO:0008270]
EN45_029010	2.073	0.7452	7.049e-05	0.0002518	A0A167XEV6_PENCH	Uncharacterized protein	296
EN45_002990	2.072	0.3404	0.0004712	0.001207	A0A167V9P5_PENCH	C2H2-type domain-containing protein	386	GO:0005634		nucleus [GO:0005634]
EN45_009870	2.072	4.978	4.487e-08	1.066e-06	A0A167VT43_PENCH	CAP10 domain-containing protein	497	GO:0016020		membrane [GO:0016020]
EN45_014090	2.072	5.034	1.45e-06	1.207e-05	A0A167W5A7_PENCH	DRBM domain-containing protein	129
EN45_030370	2.072	9.53	1.354e-09	1.173e-07	A0A167XIY6_PENCH	AN1-type zinc finger protein	321	GO:0008270			zinc ion binding [GO:0008270]
EN45_088690	2.072	4.483	1.304e-07	2.194e-06	A0A167QGB7_PENCH	Altered inheritance of mitochondria protein	364
EN45_003550	2.071	3.917	2.559e-07	3.529e-06	A0A167VB44_PENCH	Zinc-type alcohol dehydrogenase-like protein	351	GO:0016491			oxidoreductase activity [GO:0016491]
EN45_034720	2.071	2.027	9.525e-05	0.0003231	A0A167XWT3_PENCH	Putative carboxylesterase	330	GO:0016787; GO:0017000; GO:0072330	antibiotic biosynthetic process [GO:0017000]; monocarboxylic acid biosynthetic process [GO:0072330]		hydrolase activity [GO:0016787]
EN45_085850	2.069	1.344	5.576e-05	0.0002074	A0A167Q8A8_PENCH	Regulatory protein	622	GO:0000981; GO:0003677; GO:0005634; GO:0008270		nucleus [GO:0005634]	DNA binding [GO:0003677]; DNA-binding transcription factor activity, RNA polymerase II-specific [GO:0000981]; zinc ion binding [GO:0008270]
EN45_099120	2.069	0.7356	0.0004037	0.001067	A0A167R9G5_PENCH	MYND-type zinc finger protein	1122
EN45_041310	2.068	-0.09361	0.00065	0.001581	A0A169XD29_PENCH	Putative AC transposase	492	GO:0046983			protein dimerization activity [GO:0046983]
EN45_087820	2.067	8.709	2.048e-07	3.036e-06	A0A167QDW0_PENCH	Integral membrane protein	347	GO:0016020		membrane [GO:0016020]
EN45_072060	2.061	8.048	3.313e-07	4.224e-06	A0A167TUE4_PENCH	UPF0743 protein	535	GO:0003677; GO:0005634; GO:0046872		nucleus [GO:0005634]	DNA binding [GO:0003677]; metal ion binding [GO:0046872]
EN45_089210	2.061	9.758	1.215e-09	1.074e-07	A0A167QHM7_PENCH	SWIRM domain-containing protein	370
EN45_048030	2.057	5.75	2.091e-07	3.075e-06	A0A167RPZ2_PENCH	Similar to	256
EN45_073760	2.052	1.143	0.0001545	0.0004812	A0A167U0D2_PENCH	Secreted protein	387
EN45_072790	2.049	4.584	2.518e-06	1.827e-05	A0A167TWV0_PENCH	LITAF domain-containing protein	218	GO:0016020; GO:0046872		membrane [GO:0016020]	metal ion binding [GO:0046872]
EN45_068280	2.046	3.199	2.574e-06	1.85e-05	A0A167TGR9_PENCH	ASST-domain-containing protein	640	GO:0016020		membrane [GO:0016020]
EN45_111240	2.045	2.623	0.0002833	0.0007906	A0A161Z3S9_PENCH	GDP-perosamine synthase	513	GO:0003824			catalytic activity [GO:0003824]
EN45_111550	2.044	7.696	4.214e-09	2.38e-07	A0A167PZ86_PENCH	DUF202 domain-containing protein	293	GO:0005774		vacuolar membrane [GO:0005774]
EN45_104860	2.042	2.833	9.427e-07	8.903e-06	A0A167PJV4_PENCH	Cutinase transcription factor 1 alpha	452	GO:0003677; GO:0006351; GO:0008270	DNA-templated transcription [GO:0006351]		DNA binding [GO:0003677]; zinc ion binding [GO:0008270]
EN45_033820	2.041	4.704	6.859e-08	1.407e-06	A0A167XU46_PENCH	Protein phosphatase 2C-like protein	473	GO:0004722; GO:0006470	protein dephosphorylation [GO:0006470]		protein serine/threonine phosphatase activity [GO:0004722]
EN45_045310	2.04	4.668	5.602e-07	6.171e-06	A0A167YNE1_PENCH	3-beta-hydroxysteroid-Delta(8), Delta(7)-isomerase	224	GO:0005789; GO:0016125; GO:0047750	sterol metabolic process [GO:0016125]	endoplasmic reticulum membrane [GO:0005789]	cholestenol delta-isomerase activity [GO:0047750]
EN45_021880	2.036	6.955	5.434e-07	6.054e-06	A0A167WTT7_PENCH	Ribosomal RNA-processing protein	534	GO:0005634		nucleus [GO:0005634]
EN45_080060	2.036	-0.372	0.00452	0.008443	A0A167ULX5_PENCH	Putative inorganic phosphate transporter	199	GO:0016020; GO:0022857		membrane [GO:0016020]	transmembrane transporter activity [GO:0022857]
EN45_113000	2.035	5.496	3.664e-08	9.315e-07	A0A167Q1R5_PENCH	Putative quercetin 2,3-dioxygenase	287	GO:0051213			dioxygenase activity [GO:0051213]
EN45_092900	2.033	8.891	5.407e-09	2.7e-07	A0A167QSC2_PENCH	DUF1752 domain-containing protein	583
EN45_051060	2.032	1.779	0.0001115	0.0003669	A0A167RY90_PENCH	Transposase_23 domain-containing protein	301
EN45_025550	2.031	0.03621	0.003104	0.006086	A0A167X4D7_PENCH	Nudix hydrolase domain-containing protein	430
EN45_091580	2.031	1.77	1.981e-05	9.023e-05	A0A167QP07_PENCH	APH domain-containing protein	377
EN45_023740	2.028	2.043	7.571e-06	4.253e-05	A0A167WZ10_PENCH	Alpha-L-rhamnosidase rgxB	412	GO:0004650; GO:0005576; GO:0005975; GO:0071555	carbohydrate metabolic process [GO:0005975]; cell wall organization [GO:0071555]	extracellular region [GO:0005576]	polygalacturonase activity [GO:0004650]
EN45_068450	2.028	0.5438	0.0001845	0.0005555	A0A167THA5_PENCH	Peptidase S1 domain-containing protein	273
EN45_089960	2.028	7.095	2.322e-07	3.284e-06	A0A167QJE8_PENCH	CENP-V/GFA domain-containing protein	144	GO:0016846; GO:0046872			carbon-sulfur lyase activity [GO:0016846]; metal ion binding [GO:0046872]
EN45_000140	2.026	4.657	1.229e-06	1.07e-05	A0A167V1N0_PENCH	Monocarboxylate transporter	441	GO:0016020; GO:0022857		membrane [GO:0016020]	transmembrane transporter activity [GO:0022857]
EN45_092890	2.026	8.771	3.942e-09	2.33e-07	A0A167QSB4_PENCH	C3H1-type domain-containing protein	826	GO:0008270			zinc ion binding [GO:0008270]
EN45_098180	2.025	1.709	0.0003873	0.001032	A0A167R6V1_PENCH	Fumarylacetoacetate hydrolase domain-containing protein	295	GO:0016787			hydrolase activity [GO:0016787]
EN45_109520	2.021	4.374	3.39e-08	8.905e-07	A0A167PUF5_PENCH	Similar to	239
EN45_024700	2.02	1.396	2.079e-05	9.383e-05	A0A167X227_PENCH	Uncharacterized protein	282
EN45_077490	2.018	3.342	4.994e-07	5.688e-06	A0A167UD55_PENCH	1,25-dihydroxyvitamin D(3) 24-hydroxylase	484	GO:0004497; GO:0005506; GO:0016705; GO:0020037; GO:0030639; GO:0043386; GO:1901336; GO:1901617	lactone biosynthetic process [GO:1901336]; mycotoxin biosynthetic process [GO:0043386]; organic hydroxy compound biosynthetic process [GO:1901617]; polyketide biosynthetic process [GO:0030639]		heme binding [GO:0020037]; iron ion binding [GO:0005506]; monooxygenase activity [GO:0004497]; oxidoreductase activity, acting on paired donors, with incorporation or reduction of molecular oxygen [GO:0016705]
EN45_047830	2.016	5.232	1.963e-08	6.223e-07	A0A167RPJ9_PENCH	Putative glutathione-dependent formaldehyde-activating enzyme (EC 4.4.1.22) (S-(hydroxymethyl)glutathione synthase)	191	GO:0008270; GO:0046294; GO:0051907	formaldehyde catabolic process [GO:0046294]		S-(hydroxymethyl)glutathione synthase activity [GO:0051907]; zinc ion binding [GO:0008270]
EN45_029880	2.015	10.8	1.575e-09	1.28e-07	A0A167XHC5_PENCH	Peroxisomal hydratase-dehydrogenase-epimerase	901	GO:0005777; GO:0006635; GO:0016491	fatty acid beta-oxidation [GO:0006635]	peroxisome [GO:0005777]	oxidoreductase activity [GO:0016491]
EN45_049620	2.011	2.354	2.695e-05	0.0001158	A0A167RTW1_PENCH	Putative ankyrin repeat protein	397
EN45_110700	2.01	4.279	7.483e-08	1.481e-06	A0A167PWX1_PENCH	AB hydrolase-1 domain-containing protein	337	GO:0017000; GO:0072330	antibiotic biosynthetic process [GO:0017000]; monocarboxylic acid biosynthetic process [GO:0072330]
EN45_109530	2.009	1.686	2.337e-05	0.0001035	A0A167PUG5_PENCH	CENP-V/GFA domain-containing protein	181	GO:0016846; GO:0046872			carbon-sulfur lyase activity [GO:0016846]; metal ion binding [GO:0046872]
EN45_114550	2.009	5.161	6.652e-09	3.044e-07	A0A167Q595_PENCH	SnoaL-like domain-containing protein	154
EN45_052470	2.008	7.575	4.053e-09	2.362e-07	Q9URR8_PENCH	Beta-hexosaminidase (EC 3.2.1.52)	596	GO:0004563; GO:0005576; GO:0005975; GO:0102148	carbohydrate metabolic process [GO:0005975]	extracellular region [GO:0005576]	beta-N-acetylhexosaminidase activity [GO:0004563]; N-acetyl-beta-D-galactosaminidase activity [GO:0102148]
EN45_074560	2.008	1.99	0.0001646	0.0005057	A0A167U2V9_PENCH	Meiotic recombination protein	338	GO:0000150; GO:0003677; GO:0005524; GO:0005634; GO:0006281; GO:0007131; GO:0140664	DNA repair [GO:0006281]; reciprocal meiotic recombination [GO:0007131]	nucleus [GO:0005634]	ATP binding [GO:0005524]; ATP-dependent DNA damage sensor activity [GO:0140664]; DNA binding [GO:0003677]; DNA strand exchange activity [GO:0000150]
EN45_006330	2.006	2.731	7.036e-06	4.015e-05	A0A169X880_PENCH	Structural protein	625
EN45_035530	2.006	4.202	1.262e-06	1.091e-05	A0A167XZ33_PENCH	Centromere protein V	138	GO:0016846; GO:0046872			carbon-sulfur lyase activity [GO:0016846]; metal ion binding [GO:0046872]
EN45_052510	2.004	0.8013	0.000276	0.0007749	A0A167S2L1_PENCH	NTF2 domain-containing protein	85
EN45_095670	2.004	1.635	0.0001147	0.0003748	A0A167QZW9_PENCH	Malate dehydrogenase	249
EN45_096170	2.003	-0.09633	0.001977	0.004107	A0A167R190_PENCH	Demethylsterigmatocystin 6-O-methyltransferase	247	GO:0008171; GO:0032259; GO:0044550	methylation [GO:0032259]; secondary metabolite biosynthetic process [GO:0044550]		O-methyltransferase activity [GO:0008171]
EN45_111450	2.003	6.865	3.56e-08	9.155e-07	A0A167PZ59_PENCH	Putative vacuolar membrane protein	460	GO:0016020		membrane [GO:0016020]
EN45_110050	2.001	1.785	9.481e-05	0.0003222	A0A167PVR1_PENCH	Phenylalanine/tyrosine ammonia-lyase	705	GO:0005737; GO:0006559; GO:0016841	L-phenylalanine catabolic process [GO:0006559]	cytoplasm [GO:0005737]	ammonia-lyase activity [GO:0016841]
EN45_071140	-2	1.295	5.802e-05	0.0002142	A0A167TRE2_PENCH	CRAL-TRIO domain-containing protein	374
EN45_000700	-2.002	5.381	2.645e-08	7.713e-07	A0A167V3C7_PENCH	Fatty acid synthase subunit beta	2082	GO:0004313; GO:0004314; GO:0004317; GO:0004318; GO:0004320; GO:0005835; GO:0006633; GO:0008659; GO:0008693; GO:0016295; GO:0016296; GO:0016631; GO:0047451	fatty acid biosynthetic process [GO:0006633]	fatty acid synthase complex [GO:0005835]	(3R)-hydroxymyristoyl-[acyl-carrier-protein] dehydratase activity [GO:0008659]; 3-hydroxydecanoyl-[acyl-carrier-protein] dehydratase activity [GO:0008693]; 3-hydroxyoctanoyl-[acyl-carrier-protein] dehydratase activity [GO:0047451]; 3-hydroxypalmitoyl-[acyl-carrier-protein] dehydratase activity [GO:0004317]; [acyl-carrier-protein] S-acetyltransferase activity [GO:0004313]; [acyl-carrier-protein] S…
EN45_105670	-2.003	2.52	4.383e-05	0.0001712	A0A162BD00_PENCH	Engulfment and cell motility protein	698	GO:0006915; GO:0016757; GO:0017124	apoptotic process [GO:0006915]		glycosyltransferase activity [GO:0016757]; SH3 domain binding [GO:0017124]
EN45_038320	-2.005	8.026	7.213e-08	1.463e-06	A0A167Y718_PENCH	Zn(2)-C6 fungal-type domain-containing protein	671	GO:0000981; GO:0003677; GO:0005634; GO:0008270		nucleus [GO:0005634]	DNA binding [GO:0003677]; DNA-binding transcription factor activity, RNA polymerase II-specific [GO:0000981]; zinc ion binding [GO:0008270]
EN45_048690	-2.005	2.635	1.466e-05	7.083e-05	A0A167RRE6_PENCH	2-(3-amino-3-carboxypropyl)histidine synthase subunit 1 (EC 2.5.1.108)	435	GO:0017183; GO:0046872; GO:0051539; GO:0090560	peptidyl-diphthamide biosynthetic process from peptidyl-histidine [GO:0017183]		2-(3-amino-3-carboxypropyl)histidine synthase activity [GO:0090560]; 4 iron, 4 sulfur cluster binding [GO:0051539]; metal ion binding [GO:0046872]
EN45_110140	-2.005	-0.7822	0.004087	0.00775	A0A167PVX9_PENCH	Sphingoid long-chain base transporter	291	GO:0016020		membrane [GO:0016020]
EN45_007980	-2.007	1.009	0.0004024	0.001064	A0A167VM40_PENCH	Purine-cytosine permease fcyB	531	GO:0016020; GO:0022857		membrane [GO:0016020]	transmembrane transporter activity [GO:0022857]
EN45_028930	-2.01	0.3152	0.001442	0.003133	A0A167XEJ5_PENCH	BRCT domain-containing protein	693	GO:0016020		membrane [GO:0016020]
EN45_067260	-2.012	3.147	3.143e-06	2.165e-05	A0A167TDJ4_PENCH	Ribosome assembly factor mrt4	246	GO:0000027; GO:0005730; GO:0005737	ribosomal large subunit assembly [GO:0000027]	cytoplasm [GO:0005737]; nucleolus [GO:0005730]
EN45_092810	-2.015	-0.4733	0.001656	0.003527	A0A167QS26_PENCH	CVNH domain-containing protein	115
EN45_022810	-2.017	2.962	1.36e-06	1.154e-05	A0A167WWC4_PENCH	Kinesin-like protein	1007	GO:0003777; GO:0005524; GO:0005856; GO:0007018; GO:0008017	microtubule-based movement [GO:0007018]	cytoskeleton [GO:0005856]	ATP binding [GO:0005524]; microtubule binding [GO:0008017]; microtubule motor activity [GO:0003777]
EN45_083570	-2.017	0.8849	0.0004488	0.001161	A0A167UW80_PENCH	Efflux RND transporter periplasmic adaptor subunit	78	GO:0016020		membrane [GO:0016020]
EN45_092630	-2.022	1.969	7.423e-05	0.0002631	A0A167QRN5_PENCH	Tyrosine-protein phosphatase	289	GO:0004721; GO:0016311	dephosphorylation [GO:0016311]		phosphoprotein phosphatase activity [GO:0004721]
EN45_089020	-2.03	6.913	2.101e-08	6.531e-07	A0A167QH52_PENCH	penicillopepsin (EC 3.4.23.20)	475	GO:0004190; GO:0005886; GO:0006508	proteolysis [GO:0006508]	plasma membrane [GO:0005886]	aspartic-type endopeptidase activity [GO:0004190]
EN45_059620	-2.033	3.28	9.818e-06	5.203e-05	A0A167SNS1_PENCH	Formyltetrahydrofolate deformylase	287	GO:0006189; GO:0006520; GO:0006730; GO:0008864	'de novo' IMP biosynthetic process [GO:0006189]; amino acid metabolic process [GO:0006520]; one-carbon metabolic process [GO:0006730]		formyltetrahydrofolate deformylase activity [GO:0008864]
EN45_056700	-2.036	-0.5942	0.009638	0.01647	A0A167SFK8_PENCH	Zinc-regulated transporter	338	GO:0005385; GO:0016020		membrane [GO:0016020]	zinc ion transmembrane transporter activity [GO:0005385]
EN45_087880	-2.036	3.084	1.336e-06	1.14e-05	A0A167QE24_PENCH	Acetyl-CoA hydrolase (EC 3.1.2.1) (Acetyl-CoA deacylase)	525	GO:0003986; GO:0005634; GO:0006083; GO:0008775	acetate metabolic process [GO:0006083]	nucleus [GO:0005634]	acetate CoA-transferase activity [GO:0008775]; acetyl-CoA hydrolase activity [GO:0003986]
EN45_000710	-2.037	6.018	4.154e-08	1.022e-06	A0A167V3F5_PENCH	Fatty acid synthase subunit alpha (EC 1.1.1.100) (EC 2.3.1.41) (EC 2.3.1.86)	1855	GO:0000287; GO:0004315; GO:0004316; GO:0004321; GO:0005835; GO:0008897; GO:0042759; GO:0044550; GO:0046483; GO:1901360	heterocycle metabolic process [GO:0046483]; long-chain fatty acid biosynthetic process [GO:0042759]; organic cyclic compound metabolic process [GO:1901360]; secondary metabolite biosynthetic process [GO:0044550]	fatty acid synthase complex [GO:0005835]	3-oxoacyl-[acyl-carrier-protein] reductase (NADPH) activity [GO:0004316]; 3-oxoacyl-[acyl-carrier-protein] synthase activity [GO:0004315]; fatty-acyl-CoA synthase activity [GO:0004321]; holo-[acyl-carrier-protein] synthase activity [GO:0008897]; magnesium ion binding [GO:0000287]
EN45_033630	-2.038	3.705	5.23e-07	5.878e-06	A0A167XTL9_PENCH	Conidiophore development protein	383
EN45_069610	-2.038	2.375	1.4e-05	6.83e-05	A0A167TL00_PENCH	Kinase (EC 2.7.-.-)	428	GO:0016301; GO:0016310; GO:0032958	inositol phosphate biosynthetic process [GO:0032958]; phosphorylation [GO:0016310]		kinase activity [GO:0016301]
EN45_043560	-2.042	-0.2418	0.000851	0.001991	A0A161ZNE5_PENCH	Zn(2)-C6 fungal-type domain-containing protein	386	GO:0000981; GO:0005634; GO:0008270		nucleus [GO:0005634]	DNA-binding transcription factor activity, RNA polymerase II-specific [GO:0000981]; zinc ion binding [GO:0008270]
EN45_007630	-2.043	4.065	1.264e-06	1.091e-05	A0A167VL10_PENCH	TMEM135_C_rich domain-containing protein	530	GO:0016020		membrane [GO:0016020]
EN45_015080	-2.047	1.541	0.0001632	0.0005028	A0A167W8D9_PENCH	Anaphase-promoting complex, subunit 15/MND2	368	GO:0005680; GO:0030071; GO:0031145	anaphase-promoting complex-dependent catabolic process [GO:0031145]; regulation of mitotic metaphase/anaphase transition [GO:0030071]	anaphase-promoting complex [GO:0005680]
EN45_016480	-2.047	3.828	1.299e-06	1.115e-05	A0A167WD23_PENCH	Transmembrane protein	234	GO:0016020		membrane [GO:0016020]
EN45_099810	-2.055	2.826	0.000261	0.0007415	A0A167RBH5_PENCH	(S)-2-haloacid dehalogenase	266	GO:0019120			hydrolase activity, acting on acid halide bonds, in C-halide compounds [GO:0019120]
EN45_105860	-2.057	1.628	5.134e-05	0.0001947	A0A167PM21_PENCH	Uncharacterized protein	100
EN45_031210	-2.058	6.794	3.052e-08	8.329e-07	A0A167XLF2_PENCH	60S ribosomal protein	79	GO:0003735; GO:0005840; GO:0006412; GO:1990904	translation [GO:0006412]	ribonucleoprotein complex [GO:1990904]; ribosome [GO:0005840]	structural constituent of ribosome [GO:0003735]
EN45_001760	-2.059	2.542	2.185e-06	1.632e-05	A0A167V6K8_PENCH	Histone chaperone	452
EN45_052010	-2.064	4.996	4.642e-08	1.099e-06	A0A167S133_PENCH	Clr5 domain-containing protein	346
EN45_081950	-2.067	6.252	4.776e-09	2.567e-07	A0A167USA9_PENCH	ATP citrate synthase (EC 2.3.3.8)	485	GO:0000166; GO:0003878			ATP citrate synthase activity [GO:0003878]; nucleotide binding [GO:0000166]
EN45_110880	-2.068	3.119	8.252e-06	4.543e-05	A0A162CN94_PENCH	Spindle pole body protein	966	GO:0005737; GO:0008017		cytoplasm [GO:0005737]	microtubule binding [GO:0008017]
EN45_060820	-2.07	2.686	9.442e-06	5.057e-05	A0A167STG3_PENCH	Aspartokinase (EC 2.7.2.4)	518	GO:0004072; GO:0005524; GO:0008652; GO:0016310; GO:1901605	alpha-amino acid metabolic process [GO:1901605]; amino acid biosynthetic process [GO:0008652]; phosphorylation [GO:0016310]		aspartate kinase activity [GO:0004072]; ATP binding [GO:0005524]
EN45_016340	-2.073	1.281	0.0001284	0.0004116	A0A167WCR2_PENCH	Mannan endo-1,6-alpha-mannosidase (EC 3.2.1.101)	457	GO:0008496; GO:0016020; GO:0016052	carbohydrate catabolic process [GO:0016052]	membrane [GO:0016020]	mannan endo-1,6-alpha-mannosidase activity [GO:0008496]
EN45_016040	-2.079	1.149	0.0007282	0.001735	A0A161ZH77_PENCH	L-rhamnose-1-dehydrogenase	270
EN45_003990	-2.085	1.492	8.2e-05	0.0002858	A0A167VCD7_PENCH	Zn(2)-C6 fungal-type domain-containing protein	366	GO:0000981; GO:0003677; GO:0005634; GO:0008270		nucleus [GO:0005634]	DNA binding [GO:0003677]; DNA-binding transcription factor activity, RNA polymerase II-specific [GO:0000981]; zinc ion binding [GO:0008270]
EN45_012360	-2.09	3.701	1.13e-06	1.007e-05	A0A167W072_PENCH	Putative FAD-linked oxidoreductase YvdP	474	GO:0016491; GO:0044550; GO:0071949; GO:1901576	organic substance biosynthetic process [GO:1901576]; secondary metabolite biosynthetic process [GO:0044550]		FAD binding [GO:0071949]; oxidoreductase activity [GO:0016491]
EN45_060110	-2.091	1.93	0.0002022	0.000597	A0A167SQL1_PENCH	Purine permease	577	GO:0005886; GO:0022857; GO:0071702	organic substance transport [GO:0071702]	plasma membrane [GO:0005886]	transmembrane transporter activity [GO:0022857]
EN45_023340	-2.092	6.802	1.503e-07	2.431e-06	A0A167WXW4_PENCH	Zinc-regulated transporter	350	GO:0005385; GO:0016020		membrane [GO:0016020]	zinc ion transmembrane transporter activity [GO:0005385]
EN45_102340	-2.097	5.311	3.952e-07	4.811e-06	A0A167RIM2_PENCH	EXPERA domain-containing protein	322	GO:0016020		membrane [GO:0016020]
EN45_081940	-2.103	6.059	3.876e-09	2.313e-07	A0A167USA3_PENCH	ATP citrate synthase (EC 2.3.3.8)	655	GO:0003878; GO:0005524; GO:0005737; GO:0006629; GO:0046872	lipid metabolic process [GO:0006629]	cytoplasm [GO:0005737]	ATP binding [GO:0005524]; ATP citrate synthase activity [GO:0003878]; metal ion binding [GO:0046872]
EN45_056840	-2.109	4.189	4.165e-07	5.016e-06	A0A167SG19_PENCH	Ingression protein	934
EN45_103740	-2.109	5.894	5.223e-09	2.679e-07	A0A167RM56_PENCH	Glutamate decarboxylase (EC 4.1.1.15)	497	GO:0004351; GO:0006536; GO:0030170	glutamate metabolic process [GO:0006536]		glutamate decarboxylase activity [GO:0004351]; pyridoxal phosphate binding [GO:0030170]
EN45_012100	-2.113	-1.022	0.02509	0.03832	A0A167VZH2_PENCH	Mediator of RNA polymerase II transcription subunit 16	232
EN45_017440	-2.114	8.838	5.833e-08	1.281e-06	A0A167WG00_PENCH	Putative transcription factor	297	GO:0046983			protein dimerization activity [GO:0046983]
EN45_032690	-2.114	3.576	3.1e-05	0.0001298	A0A167XQP3_PENCH	Homoserine dehydrogenase (HDH) (EC 1.1.1.3)	370	GO:0004072; GO:0004412; GO:0009086; GO:0009088; GO:0009097; GO:0050661	isoleucine biosynthetic process [GO:0009097]; methionine biosynthetic process [GO:0009086]; threonine biosynthetic process [GO:0009088]		aspartate kinase activity [GO:0004072]; homoserine dehydrogenase activity [GO:0004412]; NADP binding [GO:0050661]
EN45_066460	-2.114	3.994	7.304e-06	4.137e-05	A0A167TAZ6_PENCH	Putative FAD-linked oxidoreductase	564	GO:0016491; GO:0044550; GO:0071949; GO:1901576	organic substance biosynthetic process [GO:1901576]; secondary metabolite biosynthetic process [GO:0044550]		FAD binding [GO:0071949]; oxidoreductase activity [GO:0016491]
EN45_038640	-2.119	1.892	0.0002486	0.0007116	A0A167Y837_PENCH	Heat shock protein	423
EN45_035840	-2.12	3.675	2.583e-06	1.853e-05	A0A162CUS0_PENCH	WD repeat-containing protein	617	GO:0010997; GO:0097027; GO:1904668	positive regulation of ubiquitin protein ligase activity [GO:1904668]		anaphase-promoting complex binding [GO:0010997]; ubiquitin-protein transferase activator activity [GO:0097027]
EN45_112050	-2.12	6.852	7.475e-07	7.512e-06	A0A167Q002_PENCH	High-affinity fructose transporter	564	GO:0016020; GO:0022857		membrane [GO:0016020]	transmembrane transporter activity [GO:0022857]
EN45_038300	-2.122	6.977	2.61e-07	3.553e-06	A0A167Y707_PENCH	ATPase	784
EN45_069140	-2.122	1.272	0.0001964	0.0005833	A0A167TJG8_PENCH	Integral membrane protein	378	GO:0016020		membrane [GO:0016020]
EN45_086650	-2.13	2.709	1.607e-06	1.307e-05	A0A167QAH7_PENCH	O-glucosyltransferase rumi-like protein	456	GO:0016740			transferase activity [GO:0016740]
EN45_027150	-2.131	0.9256	0.000108	0.0003574	A0A167X955_PENCH	Non-structural maintenance of chromosome element	353
EN45_109930	-2.131	-0.02951	0.0002629	0.0007451	A0A167PVF0_PENCH	Pkinase_fungal domain-containing protein	216
EN45_101860	-2.135	7.803	5.473e-08	1.236e-06	A0A162CSN6_PENCH	Guanine nucleotide-binding protein subunit beta-like protein	316	GO:0015935; GO:0043022		small ribosomal subunit [GO:0015935]	ribosome binding [GO:0043022]
EN45_104590	-2.137	0.9325	0.0002114	0.0006195	A0A167RP40_PENCH	Putative transporter	523	GO:0016020; GO:0022857		membrane [GO:0016020]	transmembrane transporter activity [GO:0022857]
EN45_113160	-2.137	2.809	3.767e-05	0.0001515	Q8NKC4_PENCH	Aromatic amino acid and leucine permease (Putative proline-specific permease)	559	GO:0016020; GO:0055085	transmembrane transport [GO:0055085]	membrane [GO:0016020]
EN45_093080	-2.138	3.244	6.272e-07	6.671e-06	A0A167QSI5_PENCH	Electron transfer protein	496	GO:0006784; GO:0016020; GO:0016653	heme A biosynthetic process [GO:0006784]	membrane [GO:0016020]	oxidoreductase activity, acting on NAD(P)H, heme protein as acceptor [GO:0016653]
EN45_106910	-2.138	-0.5699	0.001906	0.003975	A0A162CME5_PENCH	Satratoxin biosynthesis SC1 cluster protein	376	GO:0016020		membrane [GO:0016020]
EN45_093580	-2.139	3.963	3.136e-07	4.073e-06	A0A167QUD3_PENCH	Cyclin-dependent kinase	326	GO:0004674; GO:0005524; GO:0006468	protein phosphorylation [GO:0006468]		ATP binding [GO:0005524]; protein serine/threonine kinase activity [GO:0004674]
EN45_024170	-2.14	4.236	3.235e-06	2.202e-05	A0A167X089_PENCH	Homoisocitrate dehydrogenase	359	GO:0000287; GO:0016616; GO:0051287			magnesium ion binding [GO:0000287]; NAD binding [GO:0051287]; oxidoreductase activity, acting on the CH-OH group of donors, NAD or NADP as acceptor [GO:0016616]
EN45_051440	-2.14	1.537	0.0003978	0.001054	A0A167RZE9_PENCH	Mediator of RNA polymerase II transcription subunit 6 (Mediator complex subunit 6)	338	GO:0003712; GO:0006357; GO:0016592	regulation of transcription by RNA polymerase II [GO:0006357]	mediator complex [GO:0016592]	transcription coregulator activity [GO:0003712]
EN45_018620	-2.141	1.132	0.0001494	0.000468	A0A167WJC4_PENCH	Prefoldin subunit	124	GO:0006457; GO:0016272; GO:0051082	protein folding [GO:0006457]	prefoldin complex [GO:0016272]	unfolded protein binding [GO:0051082]
EN45_047480	-2.144	0.9844	0.000266	0.0007518	A0A167YUK7_PENCH	Autophagy-related protein	527	GO:0005774; GO:0006865; GO:0006914	amino acid transport [GO:0006865]; autophagy [GO:0006914]	vacuolar membrane [GO:0005774]
EN45_078570	-2.144	9.137	8.724e-09	3.638e-07	A0A167UGT7_PENCH	CipC protein	109
EN45_097320	-2.146	-0.3386	0.006602	0.01178	A0A167R4D3_PENCH	TPX2 domain-containing protein	156
EN45_001710	-2.15	5.45	4.77e-08	1.123e-06	A0A167V6H8_PENCH	Ribosomal protein YMR-31	119	GO:0006103; GO:0009353	2-oxoglutarate metabolic process [GO:0006103]	mitochondrial oxoglutarate dehydrogenase complex [GO:0009353]
EN45_017660	-2.152	-0.6611	0.0008718	0.002031	A0A167WGN8_PENCH	Succinate-semialdehyde dehydrogenase	470	GO:0016620			oxidoreductase activity, acting on the aldehyde or oxo group of donors, NAD or NADP as acceptor [GO:0016620]
EN45_104480	-2.153	-0.4075	0.002861	0.005674	A0A162CT80_PENCH	Putative MFS-type transporter	598	GO:0016020; GO:0022857		membrane [GO:0016020]	transmembrane transporter activity [GO:0022857]
EN45_069540	-2.154	0.9125	5.105e-05	0.0001938	A0A167TKQ0_PENCH	Initiation-specific alpha-1,6-mannosyltransferase	385	GO:0000009; GO:0005794; GO:0030154; GO:0043934; GO:0048856; GO:1901135	anatomical structure development [GO:0048856]; carbohydrate derivative metabolic process [GO:1901135]; cell differentiation [GO:0030154]; sporulation [GO:0043934]	Golgi apparatus [GO:0005794]	alpha-1,6-mannosyltransferase activity [GO:0000009]
EN45_068710	-2.158	1.176	0.0001199	0.000389	A0A167TI57_PENCH	Cytochrome P450	558	GO:0004497; GO:0005506; GO:0016705; GO:0020037; GO:0030639; GO:0043386; GO:1901336; GO:1901617	lactone biosynthetic process [GO:1901336]; mycotoxin biosynthetic process [GO:0043386]; organic hydroxy compound biosynthetic process [GO:1901617]; polyketide biosynthetic process [GO:0030639]		heme binding [GO:0020037]; iron ion binding [GO:0005506]; monooxygenase activity [GO:0004497]; oxidoreductase activity, acting on paired donors, with incorporation or reduction of molecular oxygen [GO:0016705]
EN45_031960	-2.165	5.127	8.802e-07	8.437e-06	A0A167XNI1_PENCH	Mannose-6-phosphate isomerase (EC 5.3.1.8) (Phosphohexomutase) (Phosphomannose isomerase)	412	GO:0004476; GO:0005975; GO:0008270; GO:0009298	carbohydrate metabolic process [GO:0005975]; GDP-mannose biosynthetic process [GO:0009298]		mannose-6-phosphate isomerase activity [GO:0004476]; zinc ion binding [GO:0008270]
EN45_071190	-2.166	3.222	3.185e-06	2.179e-05	A0A167TRJ6_PENCH	Kinesin-like protein	649	GO:0003777; GO:0005524; GO:0005874; GO:0007018; GO:0008017	microtubule-based movement [GO:0007018]	microtubule [GO:0005874]	ATP binding [GO:0005524]; microtubule binding [GO:0008017]; microtubule motor activity [GO:0003777]
EN45_013120	-2.176	2.339	2.178e-05	9.738e-05	A0A167W2H7_PENCH	Spindle pole body associated protein SnaD	857
EN45_083610	-2.178	1.525	8.926e-05	0.0003071	A0A167UWC3_PENCH	Acyl-CoA synthetase family member	525
EN45_005220	-2.186	6.021	5.18e-09	2.672e-07	A0A167VG16_PENCH	Ferric reductase transmembrane component	699	GO:0000293; GO:0006826; GO:0016020	iron ion transport [GO:0006826]	membrane [GO:0016020]	ferric-chelate reductase activity [GO:0000293]
EN45_107970	-2.186	5.76	1.088e-07	1.943e-06	A0A167PRA8_PENCH	3-hydroxybenzoate 4-monooxygenase	159	GO:0004497; GO:0044550; GO:0071949	secondary metabolite biosynthetic process [GO:0044550]		FAD binding [GO:0071949]; monooxygenase activity [GO:0004497]
EN45_002970	-2.189	3.275	1.468e-05	7.089e-05	A0A167V9M4_PENCH	Cytochrome b561 domain-containing protein	770	GO:0000444; GO:0005634; GO:0007049; GO:0016020; GO:0051301	cell cycle [GO:0007049]; cell division [GO:0051301]	membrane [GO:0016020]; MIS12/MIND type complex [GO:0000444]; nucleus [GO:0005634]
EN45_017290	-2.197	4.156	2.87e-06	2.012e-05	A0A167WFJ5_PENCH	Integral membrane protein	495	GO:0016020		membrane [GO:0016020]
EN45_096940	-2.2	2.879	4.617e-05	0.0001785	A0A167R3F8_PENCH	RNA-binding protein	825	GO:0003723			RNA binding [GO:0003723]
EN45_092640	-2.209	0.975	0.0002841	0.0007921	A0A167QRP7_PENCH	Nudix hydrolase domain-containing protein	159
EN45_011060	-2.212	3.284	1.883e-06	1.464e-05	A0A167VWL0_PENCH	Alpha-actinin-like protein	639	GO:0003779; GO:0005509; GO:0016043	cellular component organization [GO:0016043]		actin binding [GO:0003779]; calcium ion binding [GO:0005509]
EN45_075150	-2.214	2.795	0.00016	0.0004956	A0A167U4V2_PENCH	GA4 desaturase	392	GO:0016491			oxidoreductase activity [GO:0016491]
EN45_077850	-2.215	1.974	2.614e-05	0.0001133	A0A167UEI2_PENCH	Queuine tRNA-ribosyltransferase accessory subunit 2 (Queuine tRNA-ribosyltransferase domain-containing protein 1)	467	GO:0005737; GO:0008479; GO:0046872; GO:0101030	tRNA-guanine transglycosylation [GO:0101030]	cytoplasm [GO:0005737]	metal ion binding [GO:0046872]; queuine tRNA-ribosyltransferase activity [GO:0008479]
EN45_028030	-2.219	0.4244	0.001188	0.002659	A0A167XBW8_PENCH	Putative MFS-type transporter	598	GO:0016020; GO:0022857		membrane [GO:0016020]	transmembrane transporter activity [GO:0022857]
EN45_001680	-2.226	2.79	5.178e-06	3.152e-05	A0A167V6E7_PENCH	beta-galactosidase (EC 3.2.1.23)	745	GO:0004565; GO:0005576; GO:0005975; GO:0009341	carbohydrate metabolic process [GO:0005975]	beta-galactosidase complex [GO:0009341]; extracellular region [GO:0005576]	beta-galactosidase activity [GO:0004565]
EN45_077660	-2.227	5.07	2.287e-07	3.249e-06	A0A167UDT8_PENCH	Non-specific serine/threonine protein kinase	523
EN45_082140	-2.228	4.665	2.288e-07	3.249e-06	A0A167USU8_PENCH	Integral membrane protein	322	GO:0016020		membrane [GO:0016020]
EN45_003480	-2.23	2.591	5.267e-05	0.0001986	A0A167VAW2_PENCH	Putative 1-aminocyclopropane-1-carboxylate deaminase	360	GO:0008660; GO:0009310; GO:0030170	amine catabolic process [GO:0009310]		1-aminocyclopropane-1-carboxylate deaminase activity [GO:0008660]; pyridoxal phosphate binding [GO:0030170]
EN45_090340	-2.233	3.588	2.08e-07	3.063e-06	A0A167QKH4_PENCH	FHA domain-containing protein	516
EN45_079140	-2.237	5.665	1.833e-07	2.797e-06	A0A167UIY6_PENCH	Adenosine kinase (AK) (EC 2.7.1.20) (Adenosine 5'-phosphotransferase)	349	GO:0004001; GO:0005524; GO:0006166; GO:0016310; GO:0044209	AMP salvage [GO:0044209]; phosphorylation [GO:0016310]; purine ribonucleoside salvage [GO:0006166]		adenosine kinase activity [GO:0004001]; ATP binding [GO:0005524]
EN45_092650	-2.237	4.253	1.256e-06	1.088e-05	A0A162C1B5_PENCH	2-oxoisovalerate dehydrogenase subunit alpha (EC 1.2.4.4) (Branched-chain alpha-keto acid dehydrogenase E1 component alpha chain)	448	GO:0003863; GO:0009083	branched-chain amino acid catabolic process [GO:0009083]		3-methyl-2-oxobutanoate dehydrogenase (2-methylpropanoyl-transferring) activity [GO:0003863]
EN45_016140	-2.238	8.134	2.293e-10	3.935e-08	A0A167WC64_PENCH	1,3-beta-glucanosyltransferase (EC 2.4.1.-)	538	GO:0005576; GO:0005886; GO:0042123; GO:0071840; GO:0071852	cellular component organization or biogenesis [GO:0071840]; fungal-type cell wall organization or biogenesis [GO:0071852]	extracellular region [GO:0005576]; plasma membrane [GO:0005886]	glucanosyltransferase activity [GO:0042123]
EN45_071200	-2.252	3.944	4.21e-05	0.0001659	A0A167TRL5_PENCH	Uncharacterized protein	136
EN45_025950	-2.258	2.817	5.493e-07	6.09e-06	A0A167X5N3_PENCH	V-type proton ATPase proteolipid subunit	147	GO:0000324; GO:0005774; GO:0033179; GO:0046961		fungal-type vacuole [GO:0000324]; proton-transporting V-type ATPase, V0 domain [GO:0033179]; vacuolar membrane [GO:0005774]	proton-transporting ATPase activity, rotational mechanism [GO:0046961]
EN45_099740	-2.258	3.254	1.531e-06	1.261e-05	A0A167RBB6_PENCH	Putative prefoldin subunit	121	GO:0006457; GO:0016272; GO:0051082	protein folding [GO:0006457]	prefoldin complex [GO:0016272]	unfolded protein binding [GO:0051082]
EN45_076850	-2.263	4.58	0.0006424	0.001565	A0A167UAY5_PENCH	Necrosis inducing protein	292
EN45_113140	-2.265	2.317	1.181e-05	5.983e-05	A0A167Q1Z8_PENCH	Putative MFS-type transporter	534	GO:0016020; GO:0022857		membrane [GO:0016020]	transmembrane transporter activity [GO:0022857]
EN45_028350	-2.269	2.829	6.546e-06	3.798e-05	A0A167XCR3_PENCH	DUF202 domain-containing protein	238	GO:0005774		vacuolar membrane [GO:0005774]
EN45_071480	-2.269	4.928	1.314e-08	4.748e-07	A0A167TSI1_PENCH	DUF1264-domain-containing protein	230
EN45_068800	-2.277	7.927	5.5e-09	2.7e-07	A0A167TIF7_PENCH	Pyr_redox_2 domain-containing protein	392	GO:0016491			oxidoreductase activity [GO:0016491]
EN45_001340	-2.28	3.424	1.589e-06	1.296e-05	A0A161ZDM9_PENCH	Phosphomannomutase (EC 5.4.2.8)	268	GO:0004615; GO:0005737; GO:0009298	GDP-mannose biosynthetic process [GO:0009298]	cytoplasm [GO:0005737]	phosphomannomutase activity [GO:0004615]
EN45_029310	-2.28	3.214	9.425e-06	5.057e-05	A0A167XFQ9_PENCH	Aurora kinase (EC 2.7.11.1)	388	GO:0004674; GO:0005524; GO:0005819; GO:0006468	protein phosphorylation [GO:0006468]	spindle [GO:0005819]	ATP binding [GO:0005524]; protein serine/threonine kinase activity [GO:0004674]
EN45_107960	-2.285	7.215	1.355e-08	4.855e-07	A0A162CMM1_PENCH	Phenol 2-monooxygenase	309	GO:0004497; GO:0044550; GO:0071949	secondary metabolite biosynthetic process [GO:0044550]		FAD binding [GO:0071949]; monooxygenase activity [GO:0004497]
EN45_001870	-2.289	4.19	1.307e-06	1.118e-05	A0A167V6U1_PENCH	Chorismate synthase (EC 4.2.3.5)	410	GO:0004107; GO:0008652; GO:0009073; GO:0009423	amino acid biosynthetic process [GO:0008652]; aromatic amino acid family biosynthetic process [GO:0009073]; chorismate biosynthetic process [GO:0009423]		chorismate synthase activity [GO:0004107]
EN45_047070	-2.301	0.05788	0.003321	0.006457	A0A167YTI9_PENCH	DNA replication complex GINS protein PSF2	272	GO:0005634; GO:0006260; GO:0007059	chromosome segregation [GO:0007059]; DNA replication [GO:0006260]	nucleus [GO:0005634]
EN45_075400	-2.302	-0.2811	0.01229	0.02041	A0A167U5Q4_PENCH	3-hydroxybenzoate 4-monooxygenase	606	GO:0004497; GO:0044550; GO:0071949	secondary metabolite biosynthetic process [GO:0044550]		FAD binding [GO:0071949]; monooxygenase activity [GO:0004497]
EN45_028220	-2.308	1.119	0.0002163	0.0006311	A0A167XCF4_PENCH	Histone-lysine N-methyltransferase SET9 (EC 2.1.1.372) (Histone-lysine N-methyltransferase set9) (SET domain protein 9)	677	GO:0005634; GO:0034770; GO:0042799	histone H4-K20 methylation [GO:0034770]	nucleus [GO:0005634]	histone H4K20 methyltransferase activity [GO:0042799]
EN45_078240	-2.311	-0.6362	0.006368	0.01141	A0A167UFT8_PENCH	Conidial pigment biosynthesis oxidase PcAbrA	666	GO:0005507; GO:0006811; GO:0016491	ion transport [GO:0006811]		copper ion binding [GO:0005507]; oxidoreductase activity [GO:0016491]
EN45_109980	-2.311	4.58	9.043e-08	1.704e-06	A0A167PVK0_PENCH	(S)-ureidoglycine aminohydrolase	279	GO:0071522			ureidoglycine aminohydrolase activity [GO:0071522]
EN45_066690	-2.313	6.021	8.105e-09	3.477e-07	A0A167TBL7_PENCH	Vacuolar calcium ion transporter	440	GO:0005774; GO:0015369		vacuolar membrane [GO:0005774]	calcium:proton antiporter activity [GO:0015369]
EN45_107820	-2.313	1.519	3.934e-05	0.0001567	A0A161Z2Y6_PENCH	Uncharacterized protein	82
EN45_031950	-2.316	3.292	4.249e-06	2.703e-05	A0A161ZKW7_PENCH	PH domain-containing protein	301
EN45_072370	-2.318	0.3407	0.000485	0.001237	A0A167TVD0_PENCH	Putative beta-galactosidase E	329	GO:0004553; GO:0005975	carbohydrate metabolic process [GO:0005975]		hydrolase activity, hydrolyzing O-glycosyl compounds [GO:0004553]
EN45_018590	-2.328	6.633	1.037e-07	1.893e-06	A0A167WJ85_PENCH	Serine hydroxymethyltransferase (EC 2.1.2.1)	469	GO:0004372; GO:0008168; GO:0019264; GO:0030170; GO:0032259; GO:0035999	glycine biosynthetic process from serine [GO:0019264]; methylation [GO:0032259]; tetrahydrofolate interconversion [GO:0035999]		glycine hydroxymethyltransferase activity [GO:0004372]; methyltransferase activity [GO:0008168]; pyridoxal phosphate binding [GO:0030170]
EN45_013230	-2.332	4.571	1.688e-06	1.357e-05	A0A167W2V0_PENCH	chitinase (EC 3.2.1.14)	852	GO:0000272; GO:0004568; GO:0005576; GO:0006032; GO:0008061	chitin catabolic process [GO:0006032]; polysaccharide catabolic process [GO:0000272]	extracellular region [GO:0005576]	chitin binding [GO:0008061]; chitinase activity [GO:0004568]
EN45_090370	-2.338	0.4599	0.000276	0.0007749	A0A167QKL5_PENCH	15-hydroxyprostaglandin dehydrogenase	290	GO:0016491			oxidoreductase activity [GO:0016491]
EN45_087680	-2.339	7.559	7.074e-10	7.983e-08	A0A167QDI6_PENCH	G_PROTEIN_RECEP_F1_2 domain-containing protein	229	GO:0016020		membrane [GO:0016020]
EN45_070680	-2.357	5.206	3.091e-08	8.401e-07	A0A167TPT2_PENCH	Putative allantoinase	183	GO:0006144	purine nucleobase metabolic process [GO:0006144]
EN45_033550	-2.361	9.258	4.91e-09	2.624e-07	A0A167XTC2_PENCH	LEA domain-containing protein	192
EN45_010590	-2.367	3.92	6.591e-06	3.822e-05	A0A167VVB5_PENCH	Branched-chain-amino-acid aminotransferase (EC 2.6.1.42)	415	GO:0008652; GO:0009082; GO:0050048; GO:0052654; GO:0052655; GO:0052656	amino acid biosynthetic process [GO:0008652]; branched-chain amino acid biosynthetic process [GO:0009082]		L-isoleucine transaminase activity [GO:0052656]; L-leucine transaminase activity [GO:0052654]; L-leucine:2-oxoglutarate aminotransferase activity [GO:0050048]; L-valine transaminase activity [GO:0052655]
EN45_031930	-2.369	3.869	1.136e-07	1.999e-06	A0A167XNG6_PENCH	Mediator of RNA polymerase II transcription subunit 8 (Mediator complex subunit 8)	245	GO:0003712; GO:0006357; GO:0016592	regulation of transcription by RNA polymerase II [GO:0006357]	mediator complex [GO:0016592]	transcription coregulator activity [GO:0003712]
EN45_034580	-2.377	3.941	3.413e-06	2.299e-05	A0A167XWE8_PENCH	Translation initiation factor IF-2	390
EN45_047090	-2.385	4.984	1.361e-08	4.857e-07	A0A161XYZ4_PENCH	Structural maintenance of chromosomes protein	1179	GO:0000278; GO:0005524; GO:0005634; GO:0005694; GO:0007059; GO:0016887; GO:0030261; GO:0051301	cell division [GO:0051301]; chromosome condensation [GO:0030261]; chromosome segregation [GO:0007059]; mitotic cell cycle [GO:0000278]	chromosome [GO:0005694]; nucleus [GO:0005634]	ATP binding [GO:0005524]; ATP hydrolysis activity [GO:0016887]
EN45_018300	-2.387	0.1461	0.0002831	0.0007904	A0A167WIF8_PENCH	CDT1_C domain-containing protein	484	GO:0007049	cell cycle [GO:0007049]
EN45_077190	-2.388	2.69	8.019e-07	7.907e-06	A0A167UC50_PENCH	Transporter	427	GO:0016020; GO:0055085	transmembrane transport [GO:0055085]	membrane [GO:0016020]
EN45_049760	-2.391	5.294	2.253e-07	3.218e-06	A0A167RU77_PENCH	biotin synthase (EC 2.8.1.6)	389	GO:0004076; GO:0005739; GO:0009102; GO:0046872; GO:0051537; GO:0051539	biotin biosynthetic process [GO:0009102]	mitochondrion [GO:0005739]	2 iron, 2 sulfur cluster binding [GO:0051537]; 4 iron, 4 sulfur cluster binding [GO:0051539]; biotin synthase activity [GO:0004076]; metal ion binding [GO:0046872]
EN45_099880	-2.394	0.9177	3.365e-05	0.000139	A0A161XTM7_PENCH	tRNA (guanine-N(7)-)-methyltransferase (EC 2.1.1.33) (Transfer RNA methyltransferase 8) (tRNA (guanine(46)-N(7))-methyltransferase) (tRNA(m7G46)-methyltransferase)	336	GO:0000049; GO:0005634; GO:0008176		nucleus [GO:0005634]	tRNA (guanine-N7-)-methyltransferase activity [GO:0008176]; tRNA binding [GO:0000049]
EN45_058010	-2.398	1.653	2.273e-05	0.000101	A0A167SJ60_PENCH	Oxidation resistance protein	378
EN45_024780	-2.399	1.865	4.741e-06	2.933e-05	A0A167X290_PENCH	Mating-type M-specific polypeptide Mc	259	GO:0003677; GO:0005634		nucleus [GO:0005634]	DNA binding [GO:0003677]
EN45_086770	-2.41	3.226	7.936e-07	7.861e-06	A0A167QAW6_PENCH	Hydroxymethylglutaryl-CoA synthase (HMG-CoA synthase) (EC 2.3.3.10) (3-hydroxy-3-methylglutaryl coenzyme A synthase)	453	GO:0004421; GO:0006084; GO:0010142	acetyl-CoA metabolic process [GO:0006084]; farnesyl diphosphate biosynthetic process, mevalonate pathway [GO:0010142]		hydroxymethylglutaryl-CoA synthase activity [GO:0004421]
EN45_067830	-2.415	2.313	3.013e-05	0.000127	A0A167TFI0_PENCH	N-acetylglucosaminylphosphatidylinositol deacetylase (EC 3.5.1.89)	307	GO:0000225; GO:0005783; GO:0006506; GO:0016020	GPI anchor biosynthetic process [GO:0006506]	endoplasmic reticulum [GO:0005783]; membrane [GO:0016020]	N-acetylglucosaminylphosphatidylinositol deacetylase activity [GO:0000225]
EN45_112900	-2.416	3.555	4.404e-08	1.056e-06	A0A167Q1L9_PENCH	Putative oxidoreductase	285
EN45_003520	-2.418	2.692	9.676e-07	9.061e-06	A0A167VB15_PENCH	Paxillin-like protein	692	GO:0030695; GO:0035023; GO:0046872	regulation of Rho protein signal transduction [GO:0035023]		GTPase regulator activity [GO:0030695]; metal ion binding [GO:0046872]
EN45_060300	-2.418	5.981	4.476e-08	1.066e-06	A0A167SRB6_PENCH	Leptomycin B resistance protein	1333	GO:0005524; GO:0016020; GO:0140359		membrane [GO:0016020]	ABC-type transporter activity [GO:0140359]; ATP binding [GO:0005524]
EN45_002030	-2.421	1.908	4.986e-06	3.06e-05	A0A167V765_PENCH	Pex24p domain-containing protein	646	GO:0016020		membrane [GO:0016020]
EN45_111140	-2.429	-0.9811	0.006674	0.01189	A0A161Z3R6_PENCH	Lipase	347	GO:0017000; GO:0072330	antibiotic biosynthetic process [GO:0017000]; monocarboxylic acid biosynthetic process [GO:0072330]
EN45_079490	-2.431	6.123	4.485e-09	2.486e-07	A0A167UK55_PENCH	UPF0187 protein	496	GO:0005254; GO:0016020		membrane [GO:0016020]	chloride channel activity [GO:0005254]
EN45_008440	-2.432	-0.5085	0.0003533	0.0009547	A0A167VNM2_PENCH	Cytochrome oxidase assembly factor	74	GO:0005758; GO:0033617	mitochondrial cytochrome c oxidase assembly [GO:0033617]	mitochondrial intermembrane space [GO:0005758]
EN45_006490	-2.436	5.836	2.058e-07	3.044e-06	A0A167VGZ1_PENCH	Putative membrane protein	449	GO:0015267; GO:0016020		membrane [GO:0016020]	channel activity [GO:0015267]
EN45_009620	-2.45	3.883	4.947e-07	5.668e-06	A0A167VSC6_PENCH	Asparagine synthetase	572	GO:0004066; GO:0005524; GO:0006529; GO:0006541	asparagine biosynthetic process [GO:0006529]; glutamine metabolic process [GO:0006541]		asparagine synthase (glutamine-hydrolyzing) activity [GO:0004066]; ATP binding [GO:0005524]
EN45_088090	-2.459	2.541	5.459e-06	3.283e-05	A0A167QEN7_PENCH	Methylenetetrahydrofolate dehydrogenase	334	GO:0004488; GO:0006730	one-carbon metabolic process [GO:0006730]		methylenetetrahydrofolate dehydrogenase (NADP+) activity [GO:0004488]
EN45_013530	-2.468	4.959	2.142e-08	6.615e-07	A0A167W3M8_PENCH	Cytochrome P450	541	GO:0004497; GO:0005506; GO:0016705; GO:0020037; GO:0030639; GO:0043386; GO:1901336; GO:1901617	lactone biosynthetic process [GO:1901336]; mycotoxin biosynthetic process [GO:0043386]; organic hydroxy compound biosynthetic process [GO:1901617]; polyketide biosynthetic process [GO:0030639]		heme binding [GO:0020037]; iron ion binding [GO:0005506]; monooxygenase activity [GO:0004497]; oxidoreductase activity, acting on paired donors, with incorporation or reduction of molecular oxygen [GO:0016705]
EN45_031900	-2.468	4.56	7.589e-07	7.584e-06	A0A167XND6_PENCH	Cutinase	326	GO:0017000; GO:0052689; GO:0072330	antibiotic biosynthetic process [GO:0017000]; monocarboxylic acid biosynthetic process [GO:0072330]		carboxylic ester hydrolase activity [GO:0052689]
EN45_077040	-2.468	3.741	2.208e-06	1.639e-05	A0A167UBI3_PENCH	D-lactate dehydrogenase	542	GO:0003824; GO:0071704; GO:0071949	organic substance metabolic process [GO:0071704]		catalytic activity [GO:0003824]; FAD binding [GO:0071949]
EN45_031660	-2.471	3.235	5.827e-07	6.349e-06	A0A167XMN9_PENCH	Obg-like ATPase	403	GO:0005524; GO:0005525; GO:0016887			ATP binding [GO:0005524]; ATP hydrolysis activity [GO:0016887]; GTP binding [GO:0005525]
EN45_025460	-2.475	1.023	0.0006756	0.001632	A0A167X442_PENCH	Putative copper-transporting ATPase	1203	GO:0005524; GO:0016020; GO:0016887; GO:0019829; GO:0046872		membrane [GO:0016020]	ATP binding [GO:0005524]; ATP hydrolysis activity [GO:0016887]; ATPase-coupled cation transmembrane transporter activity [GO:0019829]; metal ion binding [GO:0046872]
EN45_076140	-2.477	0.6446	0.001376	0.003008	A0A167U8B0_PENCH	MPAB_Lcp_cat domain-containing protein	411	GO:0016020; GO:0016491		membrane [GO:0016020]	oxidoreductase activity [GO:0016491]
EN45_080950	-2.48	3.144	1.024e-06	9.421e-06	A0A167UPM9_PENCH	Sulfate permease	800	GO:0008271; GO:0016020		membrane [GO:0016020]	secondary active sulfate transmembrane transporter activity [GO:0008271]
EN45_053520	-2.482	5.343	7.599e-09	3.283e-07	A0A161XVZ6_PENCH	Protein HEAT-STRESS-ASSOCIATED	317
EN45_109470	-2.486	6.69	1.105e-08	4.252e-07	A0A162BDT0_PENCH	S-adenosylmethionine synthase (EC 2.5.1.6)	387	GO:0004478; GO:0005524; GO:0006556; GO:0006730; GO:0046872	one-carbon metabolic process [GO:0006730]; S-adenosylmethionine biosynthetic process [GO:0006556]		ATP binding [GO:0005524]; metal ion binding [GO:0046872]; methionine adenosyltransferase activity [GO:0004478]
EN45_029110	-2.498	2.789	6.714e-05	0.0002419	A0A167XF44_PENCH	Protein ras-2	244	GO:0003924; GO:0005525; GO:0005886; GO:0007165	signal transduction [GO:0007165]	plasma membrane [GO:0005886]	GTP binding [GO:0005525]; GTPase activity [GO:0003924]
EN45_112140	-2.503	8.279	1.519e-09	1.267e-07	A0A161Z421_PENCH	Similar to	220
EN45_042320	-2.506	-0.6109	0.0003429	0.0009307	A0A167YF99_PENCH	Alpha-galactosidase A	262
EN45_108840	-2.511	7.149	2.203e-08	6.738e-07	A0A161Z357_PENCH	Adenosylhomocysteinase (EC 3.3.1.1)	448	GO:0004013; GO:0006730	one-carbon metabolic process [GO:0006730]		adenosylhomocysteinase activity [GO:0004013]
EN45_061090	-2.514	2.048	2.635e-05	0.0001139	A0A167SUD0_PENCH	Protein-lysine N-methyltransferase EFM6 (EC 2.1.1.-) (Elongation factor methyltransferase 6)	249	GO:0005737; GO:0016279; GO:0018022	peptidyl-lysine methylation [GO:0018022]	cytoplasm [GO:0005737]	protein-lysine N-methyltransferase activity [GO:0016279]
EN45_089550	-2.518	5.467	9.56e-09	3.876e-07	A0A162C0M7_PENCH	Citrate/oxoglutarate carrier protein	313	GO:0016020		membrane [GO:0016020]
EN45_029260	-2.521	4.92	3.227e-09	2.028e-07	A0A167XFL4_PENCH	Cystathionine beta-synthase (EC 4.2.1.22)	521	GO:0004122; GO:0005737; GO:0006535; GO:0019343	cysteine biosynthetic process from serine [GO:0006535]; cysteine biosynthetic process via cystathionine [GO:0019343]	cytoplasm [GO:0005737]	cystathionine beta-synthase activity [GO:0004122]
EN45_063210	-2.527	0.3372	0.008511	0.01475	A0A167T0P1_PENCH	D-arabinitol 2-dehydrogenase	318	GO:0016491			oxidoreductase activity [GO:0016491]
EN45_106920	-2.533	2.642	0.0001332	0.0004241	A0A167PP85_PENCH	Saponin hydrolase	630
EN45_093320	-2.549	1.381	8.983e-05	0.0003087	A0A162CQT3_PENCH	Uncharacterized protein	309
EN45_056440	-2.55	0.8488	0.0005542	0.001382	A0A167SEY2_PENCH	Putative oxidoreductase YxjF	261	GO:0016491			oxidoreductase activity [GO:0016491]
EN45_086590	-2.56	4.449	8.398e-08	1.612e-06	A0A167QAE3_PENCH	GPI anchored protein	202
EN45_020700	-2.562	5.418	1.272e-08	4.711e-07	A0A167WQ99_PENCH	Metal resistance protein	1369	GO:0005524; GO:0016020; GO:0140359		membrane [GO:0016020]	ABC-type transporter activity [GO:0140359]; ATP binding [GO:0005524]
EN45_019910	-2.575	6.211	5.507e-09	2.7e-07	A0A167WMW0_PENCH	UDP-galactopyranose mutase	530
EN45_004840	-2.577	4.2	7.731e-08	1.52e-06	A0A161ZEL7_PENCH	Tryprostatin B 6-hydroxylase	525	GO:0004497; GO:0005506; GO:0016020; GO:0016705; GO:0020037; GO:0030639; GO:0043386; GO:1901336; GO:1901617	lactone biosynthetic process [GO:1901336]; mycotoxin biosynthetic process [GO:0043386]; organic hydroxy compound biosynthetic process [GO:1901617]; polyketide biosynthetic process [GO:0030639]	membrane [GO:0016020]	heme binding [GO:0020037]; iron ion binding [GO:0005506]; monooxygenase activity [GO:0004497]; oxidoreductase activity, acting on paired donors, with incorporation or reduction of molecular oxygen [GO:0016705]
EN45_047280	-2.577	4.177	1.363e-06	1.156e-05	A0A167YU27_PENCH	Methylenetetrahydrofolate reductase (EC 1.5.1.20)	610	GO:0006555; GO:0035999; GO:0106312; GO:0106313	methionine metabolic process [GO:0006555]; tetrahydrofolate interconversion [GO:0035999]		methylenetetrahydrofolate reductase NADH activity [GO:0106312]; methylenetetrahydrofolate reductase NADPH activity [GO:0106313]
EN45_114080	-2.579	2.36	2.2e-06	1.635e-05	A0A167Q4F0_PENCH	Transmembrane alpha-helix domain-containing protein	330	GO:0016020		membrane [GO:0016020]
EN45_088750	-2.58	5.359	2.752e-09	1.9e-07	A0A167QGI1_PENCH	phosphoserine transaminase (EC 2.6.1.52)	444	GO:0004648; GO:0006564	L-serine biosynthetic process [GO:0006564]		O-phospho-L-serine:2-oxoglutarate aminotransferase activity [GO:0004648]
EN45_104820	-2.588	-0.9298	0.003869	0.007384	A0A167PJT2_PENCH	ATP-grasp domain-containing protein	428	GO:0005524; GO:0046872			ATP binding [GO:0005524]; metal ion binding [GO:0046872]
EN45_018990	-2.604	8.373	6.34e-08	1.362e-06	A0A167WKB6_PENCH	Stress protein DDR48	427
EN45_038220	-2.611	4.695	1.303e-08	4.748e-07	A0A167Y6Q4_PENCH	Sugar transporter	522	GO:0008643; GO:0016020; GO:0022857	carbohydrate transport [GO:0008643]	membrane [GO:0016020]	transmembrane transporter activity [GO:0022857]
EN45_016890	-2.616	2.484	3.577e-06	2.382e-05	A0A167WEF0_PENCH	ULP_PROTEASE domain-containing protein	645
EN45_110170	-2.629	2.399	1.462e-06	1.213e-05	A0A167PVZ4_PENCH	Lactose permease	549	GO:0016020; GO:0022857		membrane [GO:0016020]	transmembrane transporter activity [GO:0022857]
EN45_009170	-2.634	-0.1576	0.003015	0.005936	A0A167VR44_PENCH	Tyrosinase	410	GO:0016491			oxidoreductase activity [GO:0016491]
EN45_048190	-2.635	-0.4529	0.02785	0.04204	A0A167RQE4_PENCH	Scyllo-inositol 2-dehydrogenase	355	GO:0000166			nucleotide binding [GO:0000166]
EN45_085960	-2.642	2.748	1.128e-06	1.007e-05	A0A167Q8N0_PENCH	DUF3421 domain-containing protein	237
EN45_056900	-2.644	8.638	4.629e-06	2.889e-05	A0A167SG85_PENCH	ABC transporter	1472	GO:0005524; GO:0005886; GO:0140359		plasma membrane [GO:0005886]	ABC-type transporter activity [GO:0140359]; ATP binding [GO:0005524]
EN45_102950	-2.644	5.87	7.225e-09	3.192e-07	A0A162CSW8_PENCH	glucan 1,4-alpha-glucosidase (EC 3.2.1.3) (1,4-alpha-D-glucan glucohydrolase) (Glucan 1,4-alpha-glucosidase)	488	GO:0004339; GO:0005976	polysaccharide metabolic process [GO:0005976]		glucan 1,4-alpha-glucosidase activity [GO:0004339]
EN45_080960	-2.645	6.908	1.557e-07	2.481e-06	Q2YFD7_PENCH	ATP synthase subunit 9, mitochondrial (Lipid-binding protein)	150	GO:0008289; GO:0015078; GO:0015986; GO:0045263	proton motive force-driven ATP synthesis [GO:0015986]	proton-transporting ATP synthase complex, coupling factor F(o) [GO:0045263]	lipid binding [GO:0008289]; proton transmembrane transporter activity [GO:0015078]
EN45_004670	-2.646	-0.7318	0.0004602	0.001184	A0A167VEC3_PENCH	DAO domain-containing protein	189	GO:0016020; GO:0016491; GO:0050660		membrane [GO:0016020]	flavin adenine dinucleotide binding [GO:0050660]; oxidoreductase activity [GO:0016491]
EN45_003650	-2.649	4.968	6.545e-08	1.377e-06	A0A167VBD0_PENCH	6-hydroxynicotinate 3-monooxygenase	448	GO:0004497; GO:0044550; GO:0071949	secondary metabolite biosynthetic process [GO:0044550]		FAD binding [GO:0071949]; monooxygenase activity [GO:0004497]
EN45_113440	-2.659	2.012	2.989e-06	2.081e-05	A0A167Q2Y1_PENCH	Putative feruloyl esterase A	284	GO:0006629; GO:0017000; GO:0072330	antibiotic biosynthetic process [GO:0017000]; lipid metabolic process [GO:0006629]; monocarboxylic acid biosynthetic process [GO:0072330]
EN45_060920	-2.661	4.531	2.699e-07	3.643e-06	A0A167STT0_PENCH	phosphoglycerate dehydrogenase (EC 1.1.1.95)	463	GO:0004617; GO:0006520; GO:0051287	amino acid metabolic process [GO:0006520]		NAD binding [GO:0051287]; phosphoglycerate dehydrogenase activity [GO:0004617]
EN45_060240	-2.662	1.896	2.111e-05	9.505e-05	A0A167SR51_PENCH	Alpha-ketoglutarate-dependent sulfonate dioxygenase	375	GO:0051213			dioxygenase activity [GO:0051213]
EN45_045810	-2.67	3.863	5.055e-06	3.094e-05	A0A167YQ00_PENCH	Secreted protein	129
EN45_021360	-2.678	5.456	7.775e-10	8.462e-08	A0A167WSB9_PENCH	Protoglobin domain-containing protein	282	GO:0019825; GO:0020037			heme binding [GO:0020037]; oxygen binding [GO:0019825]
EN45_017130	-2.681	4.992	6.831e-08	1.407e-06	A0A167WF34_PENCH	Cytochrome b2	497	GO:0016491; GO:0020037; GO:0046872			heme binding [GO:0020037]; metal ion binding [GO:0046872]; oxidoreductase activity [GO:0016491]
EN45_047510	-2.681	7.376	5.015e-10	6.634e-08	A0A161XZ26_PENCH	C6 zinc finger domain-containing protein	340
EN45_112060	-2.683	7.105	0.0003894	0.001037	A0A167Q011_PENCH	Nitrosoguanidine resistance protein	453	GO:0016020		membrane [GO:0016020]
EN45_066670	-2.688	5.578	3.887e-09	2.313e-07	A0A167TBK5_PENCH	Vacuolar calcium ion transporter	270	GO:0005774; GO:0015369		vacuolar membrane [GO:0005774]	calcium:proton antiporter activity [GO:0015369]
EN45_090160	-2.691	1.733	1.282e-06	1.104e-05	A0A167QJZ5_PENCH	G_PROTEIN_RECEP_F2_4 domain-containing protein	524	GO:0016020		membrane [GO:0016020]
EN45_020290	-2.692	6.053	9.2e-08	1.721e-06	A0A167WP30_PENCH	L-ornithine N(5)-monooxygenase (EC 1.14.13.196) (L-ornithine N(5)-oxygenase)	574	GO:0044249; GO:1901566	cellular biosynthetic process [GO:0044249]; organonitrogen compound biosynthetic process [GO:1901566]
EN45_085160	-2.695	1.926	1.997e-06	1.523e-05	A0A167V0W1_PENCH	Putative acyl-CoA synthetase YngI	624
EN45_052800	-2.704	5.76	1.827e-10	3.42e-08	A0A167S3D8_PENCH	Lysylphosphatidylglycerol biosynthesis bifunctional protein	508	GO:0005886		plasma membrane [GO:0005886]
EN45_090670	-2.712	4.008	5.615e-08	1.258e-06	A0A167QLG9_PENCH	APP1_cat domain-containing protein	487	GO:0008195			phosphatidate phosphatase activity [GO:0008195]
EN45_079690	-2.719	5.673	7.352e-09	3.232e-07	A0A167UKQ3_PENCH	Carboxylesterase NlhH	341	GO:0016787; GO:0017000; GO:0072330	antibiotic biosynthetic process [GO:0017000]; monocarboxylic acid biosynthetic process [GO:0072330]		hydrolase activity [GO:0016787]
EN45_104220	-2.719	6.185	9.829e-10	9.432e-08	A0A167RN65_PENCH	Sphingoid long-chain base transporter	291	GO:0016020		membrane [GO:0016020]
EN45_056010	-2.721	1.872	0.0002274	0.0006583	A0A167SDU1_PENCH	Putative alpha,alpha-trehalose-phosphate synthase 106 kDa subunit	845	GO:0004805; GO:0005992	trehalose biosynthetic process [GO:0005992]		trehalose-phosphatase activity [GO:0004805]
EN45_057410	-2.721	3.543	1.138e-07	1.999e-06	A0A167SHK0_PENCH	Spermatogenesis associated 6	237
EN45_016600	-2.728	4.041	2.663e-07	3.608e-06	A0A167WDH3_PENCH	Amidohydro-rel domain-containing protein	462	GO:0016810			hydrolase activity, acting on carbon-nitrogen (but not peptide) bonds [GO:0016810]
EN45_007170	-2.729	4.502	9.24e-08	1.725e-06	A0A167VJN9_PENCH	Putative inorganic phosphate transporter	664	GO:0016020; GO:0022857		membrane [GO:0016020]	transmembrane transporter activity [GO:0022857]
EN45_096440	-2.732	6.924	1.219e-06	1.064e-05	A0A167R2E8_PENCH	Methylthioribose-1-phosphate isomerase	524	GO:0005634; GO:0016787; GO:0016853; GO:1901566	organonitrogen compound biosynthetic process [GO:1901566]	nucleus [GO:0005634]	hydrolase activity [GO:0016787]; isomerase activity [GO:0016853]
EN45_019250	-2.733	0.9784	5.813e-05	0.0002146	A0A167WL38_PENCH	Dynactin subunit	204
EN45_112090	-2.746	5.641	6.274e-10	7.452e-08	A0A167Q016_PENCH	Conidiation-specific protein	121
EN45_038060	-2.751	2.495	8.68e-05	0.0003005	A0A167Y680_PENCH	Extracellular esterase EstB	275	GO:0016042; GO:0016787; GO:0017000; GO:0072330	antibiotic biosynthetic process [GO:0017000]; lipid catabolic process [GO:0016042]; monocarboxylic acid biosynthetic process [GO:0072330]		hydrolase activity [GO:0016787]
EN45_017400	-2.752	-0.4888	0.002042	0.004214	A0A167WFW2_PENCH	Aquaporin-1	306	GO:0015267; GO:0016020		membrane [GO:0016020]	channel activity [GO:0015267]
EN45_029820	-2.753	2.117	1.946e-05	8.907e-05	A0A167XH39_PENCH	Xanthine phosphoribosyltransferase	235	GO:0016020; GO:0016757		membrane [GO:0016020]	glycosyltransferase activity [GO:0016757]
EN45_107510	-2.753	2.112	1.635e-06	1.322e-05	A0A167PQE7_PENCH	BZIP domain-containing protein	362
EN45_072650	-2.771	2.726	1.087e-06	9.866e-06	A0A167TWE4_PENCH	Putative pectin lyase A	376	GO:0000272; GO:0005576; GO:0030570	polysaccharide catabolic process [GO:0000272]	extracellular region [GO:0005576]	pectate lyase activity [GO:0030570]
EN45_096130	-2.779	3.566	7.259e-07	7.381e-06	A0A167R145_PENCH	NADH-cytochrome b5 reductase (EC 1.6.2.2)	304	GO:0004128			cytochrome-b5 reductase activity, acting on NAD(P)H [GO:0004128]
EN45_090320	-2.795	6.204	1.25e-08	4.668e-07	A0A167QKG7_PENCH	Secreted beta-glucosidase	434
EN45_040890	-2.804	3.734	1.8e-06	1.416e-05	A0A169XAE6_PENCH	Cytochrome P450	534	GO:0004497; GO:0005506; GO:0016705; GO:0020037; GO:0030639; GO:0043386; GO:1901336; GO:1901617	lactone biosynthetic process [GO:1901336]; mycotoxin biosynthetic process [GO:0043386]; organic hydroxy compound biosynthetic process [GO:1901617]; polyketide biosynthetic process [GO:0030639]		heme binding [GO:0020037]; iron ion binding [GO:0005506]; monooxygenase activity [GO:0004497]; oxidoreductase activity, acting on paired donors, with incorporation or reduction of molecular oxygen [GO:0016705]
EN45_107420	-2.805	6.434	8.114e-10	8.694e-08	A0A161Z2V1_PENCH	Thioredoxin-like_fold domain-containing protein	207
EN45_002870	-2.837	2.238	1.088e-05	5.625e-05	A0A167V9D1_PENCH	Uncharacterized protein	110
EN45_079260	-2.839	3.633	2.902e-07	3.84e-06	A0A167UJB0_PENCH	Spo12 family-domain-containing protein	107
EN45_084360	-2.84	0.6751	3.457e-05	0.0001418	A0A167UYG9_PENCH	Uncharacterized protein	189
EN45_025710	-2.842	-1.195	0.0004554	0.001175	A0A161ZJC8_PENCH	4HBT domain-containing protein	185
EN45_095850	-2.842	0.4377	0.001573	0.003385	A0A167R0G2_PENCH	Siderophore iron transporter	601	GO:0016020; GO:0022857		membrane [GO:0016020]	transmembrane transporter activity [GO:0022857]
EN45_072550	-2.852	7.161	6.757e-10	7.73e-08	A0A167TVZ8_PENCH	Putative oxidoreductase	308	GO:0016491			oxidoreductase activity [GO:0016491]
EN45_102890	-2.868	1.296	5.756e-06	3.422e-05	A0A161XUC8_PENCH	Sperm motility kinase 2B	280	GO:0004521; GO:0004674; GO:0005524; GO:0006468; GO:0030968	endoplasmic reticulum unfolded protein response [GO:0030968]; protein phosphorylation [GO:0006468]		ATP binding [GO:0005524]; endoribonuclease activity [GO:0004521]; protein serine/threonine kinase activity [GO:0004674]
EN45_007010	-2.875	7.818	6.791e-09	3.076e-07	A0A167VJ19_PENCH	Uricase (EC 1.7.3.3) (Urate oxidase)	302	GO:0004846; GO:0005777; GO:0006144; GO:0019628	purine nucleobase metabolic process [GO:0006144]; urate catabolic process [GO:0019628]	peroxisome [GO:0005777]	urate oxidase activity [GO:0004846]
EN45_057420	-2.876	2.701	7.11e-07	7.293e-06	A0A167SHL1_PENCH	Protein kinase domain-containing protein	268	GO:0004672; GO:0005524; GO:0006468	protein phosphorylation [GO:0006468]		ATP binding [GO:0005524]; protein kinase activity [GO:0004672]
EN45_088240	-2.888	3.241	7.365e-07	7.444e-06	A0A162C0C8_PENCH	Carboxylesterase	385	GO:0016787; GO:0017000; GO:0072330	antibiotic biosynthetic process [GO:0017000]; monocarboxylic acid biosynthetic process [GO:0072330]		hydrolase activity [GO:0016787]
EN45_055950	-2.89	5.129	1.656e-08	5.575e-07	A0A167SDK1_PENCH	D-arabinitol 2-dehydrogenase	314	GO:0016491			oxidoreductase activity [GO:0016491]
EN45_078450	-2.891	1.629	0.0002216	0.0006439	A0A167UGG2_PENCH	Aurora kinase (EC 2.7.11.1)	445	GO:0004674; GO:0005524; GO:0005819; GO:0006468	protein phosphorylation [GO:0006468]	spindle [GO:0005819]	ATP binding [GO:0005524]; protein serine/threonine kinase activity [GO:0004674]
EN45_104520	-2.893	6.663	5.844e-08	1.281e-06	A0A167RNW7_PENCH	Cell wall protein PcPhiA	212
EN45_035870	-2.921	3.808	3.908e-07	4.777e-06	A0A167Y081_PENCH	Uncharacterized protein	102
EN45_059780	-2.925	4.419	9.555e-07	8.994e-06	A0A167SPG2_PENCH	Sugar transporter	557	GO:0008643; GO:0016020; GO:0022857	carbohydrate transport [GO:0008643]	membrane [GO:0016020]	transmembrane transporter activity [GO:0022857]
EN45_087180	-2.931	3.951	4.025e-05	0.0001597	A0A167QBX9_PENCH	Putative oxidoreductase	297	GO:0016491			oxidoreductase activity [GO:0016491]
EN45_112280	-2.931	2.387	0.008207	0.01428	A0A162CNJ7_PENCH	Delta(24(24(1)))-sterol reductase	484	GO:0016020; GO:0016126; GO:0016628	sterol biosynthetic process [GO:0016126]	membrane [GO:0016020]	oxidoreductase activity, acting on the CH-CH group of donors, NAD or NADP as acceptor [GO:0016628]
EN45_014220	-2.939	6.529	3.059e-09	1.95e-07	A0A167W5M4_PENCH	GPI anchored protein	200
EN45_066940	-2.96	4.475	0.005499	0.01001	A0A167TCH1_PENCH	RTA1 like protein	274	GO:0016020		membrane [GO:0016020]
EN45_035340	-2.976	2.675	1.903e-07	2.868e-06	A0A167XYJ3_PENCH	Putative transporter	574	GO:0016020; GO:0022857		membrane [GO:0016020]	transmembrane transporter activity [GO:0022857]
EN45_005180	-2.978	2.22	8.299e-06	4.563e-05	A0A167VFV9_PENCH	Aspartate aminotransferase (EC 2.6.1.1)	398	GO:0004069; GO:0006520; GO:0009058; GO:0030170	amino acid metabolic process [GO:0006520]; biosynthetic process [GO:0009058]		L-aspartate:2-oxoglutarate aminotransferase activity [GO:0004069]; pyridoxal phosphate binding [GO:0030170]
EN45_090930	-2.978	3.855	2.433e-07	3.383e-06	A0A162CQB2_PENCH	Homeobox domain-containing protein	528
EN45_063420	-2.984	-0.6471	8.307e-05	0.0002891	A0A167T1A9_PENCH	DCAF8	127
EN45_076330	-2.995	2.608	2.958e-06	2.062e-05	A0A167U8Z2_PENCH	Disintegrin and metalloproteinase domain-containing protein B	412	GO:0004222; GO:0006508; GO:0007229	integrin-mediated signaling pathway [GO:0007229]; proteolysis [GO:0006508]		metalloendopeptidase activity [GO:0004222]
EN45_079430	-3.026	1.666	6.75e-06	3.889e-05	A0A167UJV8_PENCH	Transposase	192
EN45_029910	-3.035	7.925	8.407e-09	3.555e-07	A0A167XHE8_PENCH	Putative transporter	498	GO:0016020; GO:0022857		membrane [GO:0016020]	transmembrane transporter activity [GO:0022857]
EN45_087030	-3.037	5.935	4.748e-09	2.567e-07	A0A167QBK9_PENCH	Putative glucose transporter	524	GO:0008643; GO:0016020; GO:0022857	carbohydrate transport [GO:0008643]	membrane [GO:0016020]	transmembrane transporter activity [GO:0022857]
EN45_114380	-3.045	2.617	1.467e-06	1.217e-05	A0A161Z4J5_PENCH	Mitotic spindle checkpoint component	224	GO:0005634; GO:0007094	mitotic spindle assembly checkpoint signaling [GO:0007094]	nucleus [GO:0005634]
EN45_066700	-3.057	7.625	2.884e-09	1.9e-07	A0A167TBM8_PENCH	African swine fever virus j13L	83	GO:0016020		membrane [GO:0016020]
EN45_024210	-3.078	2.861	1.631e-05	7.699e-05	A0A161ZIY1_PENCH	Uncharacterized protein	748
EN45_007590	-3.091	-0.4527	0.0003703	0.0009929	A0A161ZF95_PENCH	Siderophore iron transporter mirB	593	GO:0016020; GO:0022857		membrane [GO:0016020]	transmembrane transporter activity [GO:0022857]
EN45_068730	-3.106	-1.315	0.007029	0.01245	A0A167TI79_PENCH	3-hydroxybutyryl-CoA dehydrogenase	607	GO:0006631; GO:0016616; GO:0070403	fatty acid metabolic process [GO:0006631]		NAD+ binding [GO:0070403]; oxidoreductase activity, acting on the CH-OH group of donors, NAD or NADP as acceptor [GO:0016616]
EN45_114220	-3.107	-0.6752	0.0003694	0.0009909	A0A167Q4N3_PENCH	Catalase	572	GO:0004096; GO:0006979; GO:0020037; GO:0042744; GO:0046872	hydrogen peroxide catabolic process [GO:0042744]; response to oxidative stress [GO:0006979]		catalase activity [GO:0004096]; heme binding [GO:0020037]; metal ion binding [GO:0046872]
EN45_087320	-3.119	2.47	2.212e-05	9.865e-05	A0A167QCB4_PENCH	Serine/threonine-protein kinase (EC 2.7.11.21)	1143	GO:0004674; GO:0005524; GO:0006468	protein phosphorylation [GO:0006468]		ATP binding [GO:0005524]; protein serine/threonine kinase activity [GO:0004674]
EN45_017430	-3.124	6.218	4.17e-08	1.022e-06	A0A167WFZ1_PENCH	SSCRP protein	162
EN45_036210	-3.124	3.542	3.067e-06	2.122e-05	A0A167Y116_PENCH	3-isopropylmalate dehydrogenase (EC 1.1.1.85)	364	GO:0000287; GO:0003862; GO:0009098; GO:0051287	leucine biosynthetic process [GO:0009098]		3-isopropylmalate dehydrogenase activity [GO:0003862]; magnesium ion binding [GO:0000287]; NAD binding [GO:0051287]
EN45_101030	-3.124	2.109	2.476e-06	1.803e-05	A0A167RF66_PENCH	HMG box-containing protein	629	GO:0051716	cellular response to stimulus [GO:0051716]
EN45_011680	-3.128	2.682	2.247e-07	3.218e-06	A0A167VYD7_PENCH	DUF3431 domain-containing protein	305
EN45_087760	-3.171	6.891	1.692e-08	5.675e-07	A0A167QDP8_PENCH	Zinc-regulated transporter	351	GO:0005385; GO:0016020		membrane [GO:0016020]	zinc ion transmembrane transporter activity [GO:0005385]
EN45_115000	-3.178	6.486	7.032e-09	3.138e-07	A0A161Z4M9_PENCH	Ketol-acid reductoisomerase, mitochondrial (EC 1.1.1.86) (Acetohydroxy-acid reductoisomerase) (Alpha-keto-beta-hydroxylacyl reductoisomerase)	398	GO:0004455; GO:0005739; GO:0009097; GO:0009099; GO:0016853; GO:0046872	isoleucine biosynthetic process [GO:0009097]; valine biosynthetic process [GO:0009099]	mitochondrion [GO:0005739]	isomerase activity [GO:0016853]; ketol-acid reductoisomerase activity [GO:0004455]; metal ion binding [GO:0046872]
EN45_073300	-3.184	-1.203	0.004414	0.008276	A0A167TYK8_PENCH	alpha-amylase (EC 3.2.1.1)	552	GO:0004556; GO:0005509; GO:0005576; GO:0016052	carbohydrate catabolic process [GO:0016052]	extracellular region [GO:0005576]	alpha-amylase activity [GO:0004556]; calcium ion binding [GO:0005509]
EN45_066680	-3.187	1.956	2.485e-06	1.808e-05	A0A167TBL1_PENCH	Vacuolar calcium ion transporter	371	GO:0005774; GO:0015369		vacuolar membrane [GO:0005774]	calcium:proton antiporter activity [GO:0015369]
EN45_097770	-3.193	4.013	5.731e-07	6.26e-06	A0A167R5M2_PENCH	Alpha-glucosidase	577	GO:0000023; GO:0005576; GO:0044275; GO:0090599	cellular carbohydrate catabolic process [GO:0044275]; maltose metabolic process [GO:0000023]	extracellular region [GO:0005576]	alpha-glucosidase activity [GO:0090599]
EN45_036240	-3.209	2.187	4.718e-07	5.503e-06	A0A167Y148_PENCH	Pyruvate decarboxylase (EC 4.1.1.1)	609	GO:0000287; GO:0004737; GO:0030976			magnesium ion binding [GO:0000287]; pyruvate decarboxylase activity [GO:0004737]; thiamine pyrophosphate binding [GO:0030976]
EN45_090390	-3.212	2.136	9.19e-06	4.961e-05	A0A167QKQ3_PENCH	Integral membrane protein	310	GO:0016020		membrane [GO:0016020]
EN45_029020	-3.226	1.614	9.392e-07	8.879e-06	A0A167XEX1_PENCH	Methylsterol monooxygenase	351	GO:0004497; GO:0005506; GO:0016020; GO:0016126; GO:0044255	cellular lipid metabolic process [GO:0044255]; sterol biosynthetic process [GO:0016126]	membrane [GO:0016020]	iron ion binding [GO:0005506]; monooxygenase activity [GO:0004497]
EN45_006480	-3.239	1.941	1.193e-06	1.048e-05	A0A167VGW9_PENCH	Secreted protein	254	GO:0016020		membrane [GO:0016020]
EN45_113750	-3.243	2.736	2.161e-06	1.618e-05	A0A167Q3Q9_PENCH	Acyl-CoA desaturase (EC 1.14.19.1)	425	GO:0004768; GO:0006636; GO:0016020; GO:0020037; GO:0046872	unsaturated fatty acid biosynthetic process [GO:0006636]	membrane [GO:0016020]	heme binding [GO:0020037]; metal ion binding [GO:0046872]; stearoyl-CoA 9-desaturase activity [GO:0004768]
EN45_097830	-3.245	2.127	3.173e-06	2.176e-05	A0A167R5S1_PENCH	Sugar transporter	516	GO:0008643; GO:0016020; GO:0022857	carbohydrate transport [GO:0008643]	membrane [GO:0016020]	transmembrane transporter activity [GO:0022857]
EN45_001880	-3.246	-0.7465	9.434e-05	0.0003208	A0A161ZDS5_PENCH	Conidiation-specific protein	84
EN45_019770	-3.269	0.3105	5.148e-05	0.0001952	A0A167WMG4_PENCH	Uncharacterized protein	338
EN45_107950	-3.271	5.474	3.605e-09	2.203e-07	A0A162BDG7_PENCH	D-alanine-D-alanine ligase	363	GO:0005524; GO:0008716; GO:0046872; GO:0071555	cell wall organization [GO:0071555]		ATP binding [GO:0005524]; D-alanine-D-alanine ligase activity [GO:0008716]; metal ion binding [GO:0046872]
EN45_077030	-3.295	2.694	4.709e-06	2.924e-05	A0A167UBH3_PENCH	Serine/threonine-protein kinase svkA	589	GO:0004672; GO:0005524; GO:0006468	protein phosphorylation [GO:0006468]		ATP binding [GO:0005524]; protein kinase activity [GO:0004672]
EN45_098280	-3.332	8.033	8.327e-09	3.539e-07	A0A167R771_PENCH	Alkali-sensitive linkage protein	265	GO:0005576		extracellular region [GO:0005576]
EN45_023060	-3.334	1.408	3.092e-05	0.0001296	A0A161ZIQ2_PENCH	Carboxypeptidase (EC 3.4.16.-)	532	GO:0004185; GO:0006508; GO:0017000; GO:0072330	antibiotic biosynthetic process [GO:0017000]; monocarboxylic acid biosynthetic process [GO:0072330]; proteolysis [GO:0006508]		serine-type carboxypeptidase activity [GO:0004185]
EN45_004370	-3.353	1.928	2.146e-05	9.618e-05	A0A167VDG8_PENCH	G2-specific protein kinase nimA	729	GO:0004672; GO:0005524; GO:0006468	protein phosphorylation [GO:0006468]		ATP binding [GO:0005524]; protein kinase activity [GO:0004672]
EN45_005990	-3.358	-0.8377	0.001046	0.002379	A0A169X6F4_PENCH	F-box domain-containing protein	643
EN45_011750	-3.36	3.327	0.0005574	0.001387	A0A167VYK5_PENCH	Trichodiene oxygenase	503	GO:0004497; GO:0005506; GO:0016705; GO:0020037; GO:0030639; GO:0043386; GO:1901336; GO:1901617	lactone biosynthetic process [GO:1901336]; mycotoxin biosynthetic process [GO:0043386]; organic hydroxy compound biosynthetic process [GO:1901617]; polyketide biosynthetic process [GO:0030639]		heme binding [GO:0020037]; iron ion binding [GO:0005506]; monooxygenase activity [GO:0004497]; oxidoreductase activity, acting on paired donors, with incorporation or reduction of molecular oxygen [GO:0016705]
EN45_007540	-3.368	2.153	9.065e-06	4.906e-05	A0A167VKR3_PENCH	UPF0613 protein	350	GO:0017000; GO:0072330	antibiotic biosynthetic process [GO:0017000]; monocarboxylic acid biosynthetic process [GO:0072330]
EN45_075660	-3.368	-0.4809	0.0004443	0.001152	A0A167U6M8_PENCH	Mitochondrial import inner membrane translocase subunit TIM22	160	GO:0016020		membrane [GO:0016020]
EN45_078360	-3.369	6.864	9.589e-10	9.301e-08	A0A167UG69_PENCH	Lytic polysaccharide monooxygenase	400
EN45_092180	-3.373	7.838	4.518e-11	1.493e-08	A0A167QQK4_PENCH	C6 zinc finger domain-containing protein	349
EN45_038030	-3.375	5.938	3.968e-09	2.33e-07	A0A167Y644_PENCH	54S ribosomal protein	166
EN45_077650	-3.412	7.21	4.883e-10	6.634e-08	A0A167UDR5_PENCH	Similar to	136
EN45_104900	-3.42	3.597	3.732e-07	4.632e-06	A0A167PJY7_PENCH	Fungal_trans domain-containing protein	402
EN45_103730	-3.423	4.179	8.17e-08	1.585e-06	A0A167RM44_PENCH	UPF0173 metal-dependent hydrolase	359	GO:0016787			hydrolase activity [GO:0016787]
EN45_007560	-3.434	0.6821	9.554e-05	0.0003237	A0A167VKS9_PENCH	Leptomycin B resistance protein	1316	GO:0005524; GO:0016020; GO:0140359		membrane [GO:0016020]	ABC-type transporter activity [GO:0140359]; ATP binding [GO:0005524]
EN45_024290	-3.449	2.316	0.0004346	0.001131	A0A167X0J6_PENCH	Demethylsterigmatocystin 6-O-methyltransferase	444	GO:0008171; GO:0032259; GO:0044550	methylation [GO:0032259]; secondary metabolite biosynthetic process [GO:0044550]		O-methyltransferase activity [GO:0008171]
EN45_107520	-3.449	4.861	0.000826	0.001938	A0A161Z2W1_PENCH	Putative transporter	524	GO:0016020; GO:0022857		membrane [GO:0016020]	transmembrane transporter activity [GO:0022857]
EN45_092800	-3.475	1.284	0.0002923	0.0008119	A0A167QS23_PENCH	Uncharacterized protein	195
EN45_072380	-3.488	2.339	2.819e-07	3.76e-06	A0A167TVE0_PENCH	Glutathione S-transferase	223
EN45_006500	-3.489	-1.093	0.002626	0.005253	A0A167VH00_PENCH	Putative transporter	491	GO:0016020; GO:0022857		membrane [GO:0016020]	transmembrane transporter activity [GO:0022857]
EN45_059650	-3.501	0.6584	0.001871	0.003909	A0A167SNU5_PENCH	Putative aconitate hydratase	719	GO:0046872; GO:0051536			iron-sulfur cluster binding [GO:0051536]; metal ion binding [GO:0046872]
EN45_035290	-3.515	7.214	4.552e-09	2.502e-07	A0A167XYF2_PENCH	Putative glucose transporter	544	GO:0008643; GO:0016020; GO:0022857	carbohydrate transport [GO:0008643]	membrane [GO:0016020]	transmembrane transporter activity [GO:0022857]
EN45_092190	-3.558	8.432	6.699e-09	3.05e-07	A0A167QQK7_PENCH	Antifungal protein (Antifungal protein PAFB)	92
EN45_004880	-3.566	2.934	7.553e-07	7.565e-06	A0A167VEX5_PENCH	Ferric/cupric reductase transmembrane component	737	GO:0000293; GO:0006826; GO:0016020	iron ion transport [GO:0006826]	membrane [GO:0016020]	ferric-chelate reductase activity [GO:0000293]
EN45_047250	-3.568	3.811	1.201e-06	1.054e-05	A0A161ZP44_PENCH	3-isopropylmalate dehydratase (EC 4.2.1.33) (Alpha-IPM isomerase) (Isopropylmalate isomerase)	774	GO:0003861; GO:0009098; GO:0009316; GO:0046872; GO:0051539	leucine biosynthetic process [GO:0009098]	3-isopropylmalate dehydratase complex [GO:0009316]	3-isopropylmalate dehydratase activity [GO:0003861]; 4 iron, 4 sulfur cluster binding [GO:0051539]; metal ion binding [GO:0046872]
EN45_055760	-3.583	5.355	1.853e-07	2.812e-06	A0A167SCU0_PENCH	Cell wall protein	804
EN45_025400	-3.604	-0.03217	0.0001058	0.000352	A0A167X3Z2_PENCH	Uncharacterized protein	282
EN45_112620	-3.604	4.933	6.576e-08	1.381e-06	A0A167Q108_PENCH	Endo-beta-1,4-glucanase D (Endoglucanase D) (EC 3.2.1.4) (Carboxymethylcellulase D) (Cellulase D)	448	GO:0004497; GO:0005576; GO:0008810; GO:0030245; GO:0030248	cellulose catabolic process [GO:0030245]	extracellular region [GO:0005576]	cellulase activity [GO:0008810]; cellulose binding [GO:0030248]; monooxygenase activity [GO:0004497]
EN45_113760	-3.607	3.472	0.01306	0.02155	A0A161Z4G5_PENCH	Trichodiene oxygenase	493	GO:0004497; GO:0005506; GO:0016020; GO:0016705; GO:0020037; GO:0030639; GO:0043386; GO:1901336; GO:1901617	lactone biosynthetic process [GO:1901336]; mycotoxin biosynthetic process [GO:0043386]; organic hydroxy compound biosynthetic process [GO:1901617]; polyketide biosynthetic process [GO:0030639]	membrane [GO:0016020]	heme binding [GO:0020037]; iron ion binding [GO:0005506]; monooxygenase activity [GO:0004497]; oxidoreductase activity, acting on paired donors, with incorporation or reduction of molecular oxygen [GO:0016705]
EN45_025470	-3.612	3.342	3.556e-06	2.37e-05	A0A167X458_PENCH	Zinc-regulated transporter	358	GO:0005385; GO:0016020		membrane [GO:0016020]	zinc ion transmembrane transporter activity [GO:0005385]
EN45_008660	-3.652	1.694	4.034e-06	2.616e-05	A0A167VPI4_PENCH	Aorsin	665	GO:0004252; GO:0005615; GO:0006508; GO:0046872	proteolysis [GO:0006508]	extracellular space [GO:0005615]	metal ion binding [GO:0046872]; serine-type endopeptidase activity [GO:0004252]
EN45_065440	-3.703	4.256	1.539e-09	1.272e-07	A0A167T7U8_PENCH	Putative hemerythrin-like protein	192	GO:0055072	iron ion homeostasis [GO:0055072]
EN45_075930	-3.703	6.622	1.319e-07	2.208e-06	A0A167U7K8_PENCH	Putative alpha/beta-glucosidase agdC	952	GO:0005576; GO:0008422; GO:0030246; GO:0032450; GO:0102483		extracellular region [GO:0005576]	beta-glucosidase activity [GO:0008422]; carbohydrate binding [GO:0030246]; maltose alpha-glucosidase activity [GO:0032450]; scopolin beta-glucosidase activity [GO:0102483]
EN45_023370	-3.727	5.728	3.697e-08	9.372e-07	A0A167WXY3_PENCH	Allergen Asp f	348	GO:0005576; GO:0019863		extracellular region [GO:0005576]	IgE binding [GO:0019863]
EN45_081130	-3.745	1.458	8.284e-07	8.106e-06	A0A167UQ79_PENCH	Acetamidase regulatory protein	669	GO:0003677; GO:0006351; GO:0008270	DNA-templated transcription [GO:0006351]		DNA binding [GO:0003677]; zinc ion binding [GO:0008270]
EN45_017530	-3.755	2.578	2.585e-07	3.543e-06	A0A167WG92_PENCH	Nitrosoguanidine resistance protein	449	GO:0016020		membrane [GO:0016020]
EN45_097050	-3.774	-0.2938	0.003289	0.006402	A0A167R3M9_PENCH	Ribonuclease H2 subunit C	162	GO:0006401; GO:0032299	RNA catabolic process [GO:0006401]	ribonuclease H2 complex [GO:0032299]
EN45_013140	-3.802	1.095	2.647e-06	1.885e-05	A0A167W2L0_PENCH	Putative transcriptional regulatory protein	608	GO:0003677; GO:0006351; GO:0008270	DNA-templated transcription [GO:0006351]		DNA binding [GO:0003677]; zinc ion binding [GO:0008270]
EN45_003940	-3.813	1.935	1.744e-05	8.121e-05	A0A161ZEC6_PENCH	Putative flavin-containing monooxygenase	587	GO:0004497			monooxygenase activity [GO:0004497]
EN45_085990	-3.816	4.41	2.288e-09	1.716e-07	A0A167Q8P9_PENCH	Integral membrane protein	381	GO:0016020		membrane [GO:0016020]
EN45_091150	-3.843	-1.527	0.0006351	0.001549	A0A167QMV8_PENCH	Dockerin type 1	432
EN45_031570	-3.85	1.041	8.28e-07	8.106e-06	A0A167XME6_PENCH	MARVEL domain-containing protein	191	GO:0016020		membrane [GO:0016020]
EN45_041140	-3.85	4.513	1.081e-07	1.941e-06	A0A161ZMW7_PENCH	Succinate dehydrogenase assembly factor 4, mitochondrial	111
EN45_109490	-3.851	1.901	7.931e-06	4.393e-05	A0A167PUD3_PENCH	UPF0658 Golgi apparatus membrane protein	345	GO:0016020		membrane [GO:0016020]
EN45_055900	-3.856	1.955	3.547e-06	2.368e-05	A0A167SDE4_PENCH	Glycerol-3-phosphate dehydrogenase [NAD(+)] (EC 1.1.1.8)	409	GO:0005975; GO:0009331; GO:0042803; GO:0046168; GO:0047952; GO:0051287	carbohydrate metabolic process [GO:0005975]; glycerol-3-phosphate catabolic process [GO:0046168]	glycerol-3-phosphate dehydrogenase complex [GO:0009331]	glycerol-3-phosphate dehydrogenase [NAD(P)+] activity [GO:0047952]; NAD binding [GO:0051287]; protein homodimerization activity [GO:0042803]
EN45_087890	-3.862	6.864	1.878e-10	3.42e-08	A0A167QE36_PENCH	TrwC domain-containing protein	80
EN45_092420	-3.873	0.8904	0.00154	0.003322	A0A162CQP1_PENCH	Boletus edulis lectin	139	GO:0030246			carbohydrate binding [GO:0030246]
EN45_078950	-3.888	-0.4192	1.445e-05	7.008e-05	A0A167UIA1_PENCH	Putative sterigmatocystin biosynthesis monooxygenase stcW	589	GO:0004499; GO:0050660; GO:0050661			flavin adenine dinucleotide binding [GO:0050660]; N,N-dimethylaniline monooxygenase activity [GO:0004499]; NADP binding [GO:0050661]
EN45_029030	-3.918	-0.3936	3.162e-05	0.000132	A0A167XEY0_PENCH	Uncharacterized protein	446
EN45_034460	-3.929	2.663	2.063e-06	1.562e-05	A0A167XW24_PENCH	RING-type domain-containing protein	201	GO:0019538; GO:0046872	protein metabolic process [GO:0019538]		metal ion binding [GO:0046872]
EN45_055940	-3.941	5.56	1.762e-09	1.391e-07	A0A167SDI1_PENCH	3-oxoacyl-[acyl-carrier-protein] reductase FabG	295	GO:0016491			oxidoreductase activity [GO:0016491]
EN45_007840	-3.958	4.728	1.382e-10	2.802e-08	A0A167VLQ5_PENCH	Small hydrophilic protein	75
EN45_013030	-3.963	6.288	6.477e-11	1.818e-08	A0A167W280_PENCH	Zinc-type alcohol dehydrogenase-like protein	447	GO:0008270; GO:0016491			oxidoreductase activity [GO:0016491]; zinc ion binding [GO:0008270]
EN45_025760	-3.983	0.4342	0.0002789	0.0007813	A0A167X4Y9_PENCH	Putative membrane protein	282
EN45_017120	-3.987	3.133	2.116e-07	3.103e-06	A0A167WF26_PENCH	Sugar transporter	541	GO:0008643; GO:0016020; GO:0022857	carbohydrate transport [GO:0008643]	membrane [GO:0016020]	transmembrane transporter activity [GO:0022857]
EN45_107940	-3.998	5.019	2.996e-09	1.942e-07	A0A167PR96_PENCH	Mediator complex subunit 11	208
EN45_107100	-4.013	7.732	1.78e-10	3.42e-08	A0A161Z2T2_PENCH	Conidiation-specific protein	131
EN45_057390	-4.015	0.9423	2.229e-06	1.652e-05	A0A167SHJ8_PENCH	Extracellular membrane protein, CFEM domain protein	245	GO:0016020		membrane [GO:0016020]
EN45_108850	-4.027	-1.513	0.0006451	0.00157	A0A167PT51_PENCH	DUF1736 domain-containing protein	213
EN45_012140	-4.052	-0.7378	0.001833	0.003842	A0A167VZL6_PENCH	Fungal_trans domain-containing protein	535	GO:0003677; GO:0006351; GO:0008270; GO:0016020	DNA-templated transcription [GO:0006351]	membrane [GO:0016020]	DNA binding [GO:0003677]; zinc ion binding [GO:0008270]
EN45_065300	-4.061	6.9	8.417e-11	1.926e-08	A0A167T7H2_PENCH	D-xylose reductase [NAD(P)H] (EC 1.1.1.307)	315	GO:0016491			oxidoreductase activity [GO:0016491]
EN45_014150	-4.092	2.643	7.335e-07	7.438e-06	A0A167W5I1_PENCH	Putative sucrose utilization protein	608	GO:0000981; GO:0003677; GO:0005634; GO:0008270		nucleus [GO:0005634]	DNA binding [GO:0003677]; DNA-binding transcription factor activity, RNA polymerase II-specific [GO:0000981]; zinc ion binding [GO:0008270]
EN45_111110	-4.109	-0.7105	0.001029	0.002349	A0A162BYU6_PENCH	Nitrate/nitrite transporter	511	GO:0005886; GO:0015112; GO:0015113; GO:0042128	nitrate assimilation [GO:0042128]	plasma membrane [GO:0005886]	nitrate transmembrane transporter activity [GO:0015112]; nitrite transmembrane transporter activity [GO:0015113]
EN45_107470	-4.117	-0.9309	0.0004377	0.001139	A0A167PQ86_PENCH	Spore-wall fungal hydrophobin PcDewA	122	GO:0005199; GO:0009277		fungal-type cell wall [GO:0009277]	structural constituent of cell wall [GO:0005199]
EN45_085820	-4.125	0.6951	0.0005398	0.001352	A0A167Q860_PENCH	AB hydrolase-1 domain-containing protein	389	GO:0017000; GO:0072330	antibiotic biosynthetic process [GO:0017000]; monocarboxylic acid biosynthetic process [GO:0072330]
EN45_111090	-4.153	5.394	2.891e-09	1.9e-07	A0A167PXW6_PENCH	Nitrite reductase	1086	GO:0008942; GO:0020037; GO:0042128; GO:0046872; GO:0051537; GO:0051539	nitrate assimilation [GO:0042128]		2 iron, 2 sulfur cluster binding [GO:0051537]; 4 iron, 4 sulfur cluster binding [GO:0051539]; heme binding [GO:0020037]; metal ion binding [GO:0046872]; nitrite reductase [NAD(P)H] activity [GO:0008942]
EN45_087120	-4.171	6.643	9.296e-08	1.728e-06	A0A167QBS6_PENCH	CMD domain-containing protein	206
EN45_104890	-4.183	2.097	1.516e-07	2.433e-06	A0A167PJY2_PENCH	Nuclear receptor domain-containing protein	413
EN45_009100	-4.184	6.576	1.307e-11	8.287e-09	A0A161ZFL8_PENCH	Extracellular serine-threonine rich protein	374
EN45_075160	-4.192	2.325	2.606e-06	1.865e-05	A0A167U4W4_PENCH	Asparagine synthetase	674	GO:0004066; GO:0005524; GO:0006529; GO:0006541	asparagine biosynthetic process [GO:0006529]; glutamine metabolic process [GO:0006541]		asparagine synthase (glutamine-hydrolyzing) activity [GO:0004066]; ATP binding [GO:0005524]
EN45_093620	-4.192	3.062	6.471e-06	3.764e-05	A0A162CQU5_PENCH	Brefeldin A resistance protein	1489	GO:0005524; GO:0005886; GO:0140359		plasma membrane [GO:0005886]	ABC-type transporter activity [GO:0140359]; ATP binding [GO:0005524]
EN45_009420	-4.194	1.857	2.584e-07	3.543e-06	A0A167VRU2_PENCH	Putative lactate 2-monooxygenase	422	GO:0004497; GO:0010181			FMN binding [GO:0010181]; monooxygenase activity [GO:0004497]
EN45_107530	-4.207	0.9684	0.009411	0.01613	A0A167PQF5_PENCH	Uncharacterized protein	254
EN45_016820	-4.226	7.208	1.645e-10	3.262e-08	A0A167WE95_PENCH	MARVEL domain-containing protein	173	GO:0016020		membrane [GO:0016020]
EN45_039690	-4.237	0.5138	5.769e-05	0.0002132	A0A167YAZ0_PENCH	Putative urea active transporter	686	GO:0015204; GO:0016020		membrane [GO:0016020]	urea transmembrane transporter activity [GO:0015204]
EN45_003910	-4.256	-1.196	0.0003694	0.0009909	A0A167VC66_PENCH	Fumarate reductase flavoprotein subunit	490	GO:0016491			oxidoreductase activity [GO:0016491]
EN45_049710	-4.257	-1.158	0.0001467	0.0004606	A0A167RU32_PENCH	Putative secreted protein	204
EN45_086870	-4.26	-1.391	0.0005041	0.001276	A0A167QB62_PENCH	Peptidase M20 domain-containing protein 2	418	GO:0005576; GO:0006508; GO:0016805	proteolysis [GO:0006508]	extracellular region [GO:0005576]	dipeptidase activity [GO:0016805]
EN45_030480	-4.315	0.4278	0.0001186	0.0003862	A0A167XJA4_PENCH	Homeobox protein	532	GO:0003677; GO:0005634		nucleus [GO:0005634]	DNA binding [GO:0003677]
EN45_007550	-4.329	0.1883	8.15e-05	0.000285	A0A167VKS1_PENCH	Nonribosomal peptide synthetase	2076	GO:0016874; GO:0018130; GO:0031177; GO:0044283; GO:0044550; GO:1901362	heterocycle biosynthetic process [GO:0018130]; organic cyclic compound biosynthetic process [GO:1901362]; secondary metabolite biosynthetic process [GO:0044550]; small molecule biosynthetic process [GO:0044283]		ligase activity [GO:0016874]; phosphopantetheine binding [GO:0031177]
EN45_109230	-4.329	2.481	0.000212	0.0006204	A0A167PTW4_PENCH	L-gulono-1,4-lactone dehydrogenase	480	GO:0016899; GO:0071704; GO:0071949	organic substance metabolic process [GO:0071704]		FAD binding [GO:0071949]; oxidoreductase activity, acting on the CH-OH group of donors, oxygen as acceptor [GO:0016899]
EN45_003930	-4.346	1.002	6.209e-07	6.62e-06	A0A167VC79_PENCH	Integral membrane protein	388	GO:0016020		membrane [GO:0016020]
EN45_055910	-4.361	3.522	9.285e-10	9.106e-08	A0A167SDF3_PENCH	Catalase (EC 1.11.1.6)	745	GO:0004096; GO:0006979; GO:0020037; GO:0042744; GO:0046872	hydrogen peroxide catabolic process [GO:0042744]; response to oxidative stress [GO:0006979]		catalase activity [GO:0004096]; heme binding [GO:0020037]; metal ion binding [GO:0046872]
EN45_069570	-4.376	2.078	1.793e-06	1.414e-05	A0A167TKU8_PENCH	GPI-anchored CFEM domain protein	180	GO:0005886		plasma membrane [GO:0005886]
EN45_065450	-4.38	4.948	1.208e-09	1.074e-07	A0A167T7V5_PENCH	Putative diacetyl reductase	322	GO:0008270; GO:0016491			oxidoreductase activity [GO:0016491]; zinc ion binding [GO:0008270]
EN45_020310	-4.386	2.785	4.306e-07	5.1e-06	A0A167WP50_PENCH	Hydroxymethylglutaryl-CoA synthase (HMG-CoA synthase) (EC 2.3.3.10) (3-hydroxy-3-methylglutaryl coenzyme A synthase)	458	GO:0004421; GO:0006084; GO:0010142	acetyl-CoA metabolic process [GO:0006084]; farnesyl diphosphate biosynthetic process, mevalonate pathway [GO:0010142]		hydroxymethylglutaryl-CoA synthase activity [GO:0004421]
EN45_048250	-4.396	5.07	3.003e-09	1.942e-07	A0A167RQJ0_PENCH	Amidase	652	GO:0003824			catalytic activity [GO:0003824]
EN45_087130	-4.42	5.553	3.894e-07	4.776e-06	A0A167QBT3_PENCH	Cucumopine_C domain-containing protein	334
EN45_112970	-4.474	1.535	1.143e-06	1.017e-05	A0A167Q1N5_PENCH	Ammonium transporter	473	GO:0005886; GO:0008519		plasma membrane [GO:0005886]	ammonium transmembrane transporter activity [GO:0008519]
EN45_036230	-4.534	6.943	3.237e-12	5.777e-09	A0A167Y136_PENCH	Uncharacterized protein	81
EN45_047790	-4.537	1.746	6.751e-07	7.006e-06	A0A167RPG3_PENCH	Arabinan endo-1,5-alpha-L-arabinosidase (EC 3.2.1.99)	322	GO:0031222; GO:0046558	arabinan catabolic process [GO:0031222]		arabinan endo-1,5-alpha-L-arabinosidase activity [GO:0046558]
EN45_036800	-4.542	-1.389	0.001306	0.002877	A0A167Y2T3_PENCH	Integral membrane protein	436	GO:0000139; GO:0006506; GO:0016757	GPI anchor biosynthetic process [GO:0006506]	Golgi membrane [GO:0000139]	glycosyltransferase activity [GO:0016757]
EN45_000540	-4.641	4.162	8.493e-10	8.813e-08	A0A167V2U1_PENCH	Altered inheritance of mitochondria protein 6-like protein	370	GO:0006629; GO:0008081; GO:0016020	lipid metabolic process [GO:0006629]	membrane [GO:0016020]	phosphoric diester hydrolase activity [GO:0008081]
EN45_090980	-4.681	2.125	6.701e-06	3.865e-05	A0A167QMD9_PENCH	FA_desaturase domain-containing protein	436	GO:0006629; GO:0016020	lipid metabolic process [GO:0006629]	membrane [GO:0016020]
EN45_107880	-4.697	-1.467	0.0001637	0.0005039	A0A167PR54_PENCH	LBR_tudor domain-containing protein	338
EN45_051790	-4.769	-1.338	0.0004391	0.001142	A0A167S0D4_PENCH	allantoinase (EC 3.5.2.5)	524	GO:0000256; GO:0004038; GO:0008270; GO:0050897	allantoin catabolic process [GO:0000256]		allantoinase activity [GO:0004038]; cobalt ion binding [GO:0050897]; zinc ion binding [GO:0008270]
EN45_097210	-4.801	3.066	4.685e-07	5.48e-06	A0A167R445_PENCH	Ammonium transporter	569	GO:0005886; GO:0008519		plasma membrane [GO:0005886]	ammonium transmembrane transporter activity [GO:0008519]
EN45_104920	-4.891	4.068	1.138e-08	4.359e-07	A0A167PJZ6_PENCH	1,3-beta-glucanosyltransferase (EC 2.4.1.-)	515	GO:0005576; GO:0005886; GO:0042123; GO:0071840; GO:0071852	cellular component organization or biogenesis [GO:0071840]; fungal-type cell wall organization or biogenesis [GO:0071852]	extracellular region [GO:0005576]; plasma membrane [GO:0005886]	glucanosyltransferase activity [GO:0042123]
EN45_035300	-5.024	1.043	5.806e-06	3.445e-05	A0A167XYG2_PENCH	Secreted protein	156
EN45_049540	-5.048	0.5078	2.256e-05	0.0001003	A0A167RTR2_PENCH	Integral membrane protein	364	GO:0016020		membrane [GO:0016020]
EN45_003800	-5.082	-0.5024	2.126e-05	9.549e-05	A0A167VBV4_PENCH	Delta(12) fatty acid desaturase	395	GO:0006629; GO:0016020	lipid metabolic process [GO:0006629]	membrane [GO:0016020]
EN45_047770	-5.124	6.852	6.902e-11	1.818e-08	A0A167RPE2_PENCH	Zinc-regulated transporter	360	GO:0005385; GO:0016020		membrane [GO:0016020]	zinc ion transmembrane transporter activity [GO:0005385]
EN45_086850	-5.127	7.206	1.149e-10	2.441e-08	A0A167QB42_PENCH	Oxalate decarboxylase OxdC	461	GO:0033609; GO:0046872	oxalate metabolic process [GO:0033609]		metal ion binding [GO:0046872]
EN45_115150	-5.17	-0.7545	3.585e-05	0.000146	A0A167Q6K6_PENCH	Similar to	157
EN45_007870	-5.179	4.47	8.604e-10	8.826e-08	A0A161YLJ0_PENCH	Putative transporter	640	GO:0016020; GO:0022857		membrane [GO:0016020]	transmembrane transporter activity [GO:0022857]
EN45_067110	-5.284	2.503	1.089e-07	1.943e-06	A0A167TD15_PENCH	F-box domain-containing protein	291
EN45_072210	-5.355	0.6472	7.473e-06	4.202e-05	A0A167TUV0_PENCH	G_PROTEIN_RECEP_F2_4 domain-containing protein	425	GO:0004888; GO:0007166; GO:0016020	cell surface receptor signaling pathway [GO:0007166]	membrane [GO:0016020]	transmembrane signaling receptor activity [GO:0004888]
EN45_009920	-5.394	5.845	3.561e-10	5.479e-08	A0A167VT88_PENCH	Glutamate dehydrogenase	461	GO:0000166; GO:0004354; GO:0006520	amino acid metabolic process [GO:0006520]		glutamate dehydrogenase (NADP+) activity [GO:0004354]; nucleotide binding [GO:0000166]
EN45_006390	-5.43	2.175	2.485e-07	3.438e-06	A0A167VGI3_PENCH	Transmembrane protein	335	GO:0016020		membrane [GO:0016020]
EN45_052360	-5.501	6.843	8.903e-10	9.028e-08	A0A167S234_PENCH	LEA domain protein	1171
EN45_086630	-5.578	2.185	3.868e-07	4.754e-06	B6F254_PENCH	Endo-1,4-beta-xylanase (EC 3.2.1.8)	216	GO:0005576; GO:0031176; GO:0045493	xylan catabolic process [GO:0045493]	extracellular region [GO:0005576]	endo-1,4-beta-xylanase activity [GO:0031176]
EN45_024300	-5.604	-1.458	8.667e-05	0.0003003	A0A167X0L8_PENCH	Integral membrane protein	371	GO:0016020		membrane [GO:0016020]
EN45_106900	-5.789	-0.9071	6.99e-06	3.994e-05	A0A162BD86_PENCH	Bifunctional solanapyrone synthase	541	GO:0071704; GO:0071949	organic substance metabolic process [GO:0071704]		FAD binding [GO:0071949]
EN45_086740	-5.808	-0.07852	2.774e-05	0.0001188	A0A167QAT4_PENCH	Ankyrin-3	190
EN45_067390	-5.853	4.223	1.871e-08	6.048e-07	A0A167TDZ1_PENCH	penicillopepsin (EC 3.4.23.20)	396	GO:0004190; GO:0006508	proteolysis [GO:0006508]		aspartic-type endopeptidase activity [GO:0004190]
EN45_007570	-5.929	-1.258	5.024e-05	0.0001916	A0A161YKF6_PENCH	Putative lysine N-acyltransferase	442	GO:0016746; GO:0019290	siderophore biosynthetic process [GO:0019290]		acyltransferase activity [GO:0016746]
EN45_007650	-6.283	4.818	2.593e-08	7.611e-07	A0A167VL26_PENCH	endo-polygalacturonase (EC 3.2.1.15)	369	GO:0004650; GO:0005576; GO:0045490; GO:0071555	cell wall organization [GO:0071555]; pectin catabolic process [GO:0045490]	extracellular region [GO:0005576]	polygalacturonase activity [GO:0004650]
EN45_086280	-6.387	-0.8532	3.551e-06	2.368e-05	A0A162CPD2_PENCH	Putative extracellular glycosidase	371	GO:0004553; GO:0005886; GO:0005975	carbohydrate metabolic process [GO:0005975]	plasma membrane [GO:0005886]	hydrolase activity, hydrolyzing O-glycosyl compounds [GO:0004553]
EN45_093650	-6.397	0.4905	4.833e-05	0.0001856	A0A162C1N4_PENCH	Molecular chaperone	252
EN45_104910	-6.445	7.076	2.875e-11	1.125e-08	A0A161Z2C3_PENCH	Uncharacterized protein	103
EN45_084490	-6.45	6.505	6.685e-10	7.73e-08	A0A167UYX9_PENCH	COBW domain-containing protein	572
EN45_057030	-6.638	-1.715	7.262e-07	7.381e-06	A0A167SGL7_PENCH	MYND-type domain-containing protein	517
EN45_047730	-7.066	1.05	2.329e-05	0.0001032	A0A161XZ43_PENCH	Hexose transporter	511	GO:0016020; GO:0022857		membrane [GO:0016020]	transmembrane transporter activity [GO:0022857]
EN45_090540	-7.561	1.761	5.095e-05	0.0001936	A0A167QL44_PENCH	Alpha-amylase A type-3	334	GO:0005576; GO:0005975	carbohydrate metabolic process [GO:0005975]	extracellular region [GO:0005576]
EN45_086750	-8.182	1.02	7.798e-06	4.352e-05	A0A167QAU5_PENCH	4-carboxymuconolactone decarboxylase	143	GO:0051920			peroxiredoxin activity [GO:0051920]
EN45_007880	-8.604	2.32	3.616e-07	4.525e-06	A0A167VLU4_PENCH	Secreted protein	145
EN45_090550	-8.71	-1.453	3.202e-07	4.13e-06	A0A162C0W5_PENCH	Alpha-amylase	157	GO:0005576; GO:0005975	carbohydrate metabolic process [GO:0005975]	extracellular region [GO:0005576]
EN45_001670	-9.817	5.571	6.953e-12	8.287e-09	A0A161ZDQ5_PENCH	Linear gramicidin synthase subunit D	1038
EN45_087410	-9.824	4.636	7.157e-10	7.983e-08	A0A162CPK8_PENCH	Versicolorin B desaturase	499	GO:0004497; GO:0005506; GO:0016020; GO:0016705; GO:0020037; GO:0030639; GO:0043386; GO:1901336; GO:1901617	lactone biosynthetic process [GO:1901336]; mycotoxin biosynthetic process [GO:0043386]; organic hydroxy compound biosynthetic process [GO:1901617]; polyketide biosynthetic process [GO:0030639]	membrane [GO:0016020]	heme binding [GO:0020037]; iron ion binding [GO:0005506]; monooxygenase activity [GO:0004497]; oxidoreductase activity, acting on paired donors, with incorporation or reduction of molecular oxygen [GO:0016705]
EN45_025750	-10.16	1.991	3.672e-07	4.582e-06	A0A167X4X7_PENCH	Sugar transporter	517	GO:0008643; GO:0016020; GO:0022857	carbohydrate transport [GO:0008643]	membrane [GO:0016020]	transmembrane transporter activity [GO:0022857]

## Sheet: APAP48h vs GLU48h
Gene	logFC	AveExpr	P.Value	adj.P.Val	Entry Name	Protein names	Length	GO IDs	GO Biological process	GO Cellular Compartment	GO Molecular Function
EN45_037770	10.91	0.02814	2.405e-08	3.285e-06	A0A167Y5D6_PENCH	Chanoclavine-I aldehyde reductase	364	GO:0010181; GO:0016491			FMN binding [GO:0010181]; oxidoreductase activity [GO:0016491]
EN45_097010	10.18	2.11	9.289e-07	2.506e-05	A0A167R3J6_PENCH	Putative MFS-type transporter	533	GO:0016021; GO:0022857		integral component of membrane [GO:0016021]	transmembrane transporter activity [GO:0022857]
EN45_053100	8.643	-1.106	2.465e-07	1.155e-05	A0A167S4F6_PENCH	Putative acyl-CoA dehydrogenase	161
EN45_003790	8.561	-1.147	5.287e-07	1.789e-05	A0A167VBU3_PENCH	DUF1275 domain protein	323	GO:0016021		integral component of membrane [GO:0016021]
EN45_058880	8.448	0.161	0.000519	0.002067	A0A167SLP9_PENCH	Hce2 domain-containing protein	122
EN45_026570	8.039	0.09886	0.0001158	0.0006363	A0A167X7G7_PENCH	Putative transporter	391	GO:0016021; GO:0022857		integral component of membrane [GO:0016021]	transmembrane transporter activity [GO:0022857]
EN45_002170	7.666	1.006	2.25e-05	0.000192	A0A167V7I3_PENCH	Zinc finger protein	297	GO:0005634		nucleus [GO:0005634]
EN45_003720	7.174	7.217	2.907e-12	2.588e-08	A0A167VBL3_PENCH	Carboxyvinyl-carboxyphosphonate phosphorylmutase	326	GO:0016829			lyase activity [GO:0016829]
EN45_010050	7.174	2.085	5.145e-05	0.0003472	A0A167VTM9_PENCH	Peroxidase	537	GO:0004601; GO:0020037			heme binding [GO:0020037]; peroxidase activity [GO:0004601]
EN45_031750	7.12	6.263	7.936e-12	2.925e-08	A0A161ZKU3_PENCH	Zinc-type alcohol dehydrogenase-like protein	347	GO:0016491			oxidoreductase activity [GO:0016491]
EN45_094770	6.992	8.883	1.58e-09	6.858e-07	A0A162C210_PENCH	Bifunctional pinoresinol-lariciresinol reductase	293	GO:0016491			oxidoreductase activity [GO:0016491]
EN45_042840	6.852	-0.4535	1.627e-05	0.000154	A0A167YGL2_PENCH	Adhesive plaque matrix protein	202
EN45_071130	6.781	-0.3263	2.066e-06	4.076e-05	A0A167TRC5_PENCH	Ferric reductase transmembrane component	375	GO:0016021; GO:0016491		integral component of membrane [GO:0016021]	oxidoreductase activity [GO:0016491]
EN45_039790	6.712	4.804	1.647e-10	1.333e-07	A0A167YB86_PENCH	Mannan endo-1,6-alpha-mannosidase (EC 3.2.1.101)	472	GO:0008496; GO:0016021; GO:0016052	carbohydrate catabolic process [GO:0016052]	integral component of membrane [GO:0016021]	mannan endo-1,6-alpha-mannosidase activity [GO:0008496]
EN45_026410	6.706	0.3931	7.816e-05	0.0004727	A0A167X706_PENCH	SirQ	388
EN45_093710	6.675	6.78	1.314e-11	2.925e-08	A0A167QUL5_PENCH	DUF1993 domain-containing protein	170
EN45_045930	6.67	5.537	9.358e-11	8.341e-08	A0A167YQA4_PENCH	Neutral protease 2 (EC 3.4.24.39) (Deuterolysin)	350	GO:0004222; GO:0005576; GO:0006508; GO:0046872	proteolysis [GO:0006508]	extracellular region [GO:0005576]	metal ion binding [GO:0046872]; metalloendopeptidase activity [GO:0004222]
EN45_099000	6.638	1.866	7.621e-06	9.32e-05	A0A167R947_PENCH	Alkaline phosphatase (EC 3.1.3.1)	660	GO:0004035			alkaline phosphatase activity [GO:0004035]
EN45_045950	6.491	-0.8203	8.234e-06	9.747e-05	A0A167YQB3_PENCH	Threonylcarbamoyl-AMP synthase (EC 2.7.7.87)	236	GO:0003725			double-stranded RNA binding [GO:0003725]
EN45_077120	6.413	-1.285	3.33e-06	5.502e-05	A0A167UBU4_PENCH	Putative nitrilase	241	GO:0006807	nitrogen compound metabolic process [GO:0006807]
EN45_042330	6.23	-2.313	4.135e-06	6.297e-05	A0A167YFA8_PENCH	Uncharacterized protein	174
EN45_053090	6.12	-2.368	9.178e-06	0.0001045	A0A161XVV7_PENCH	Cytochrome P450	468	GO:0004497; GO:0005506; GO:0008152; GO:0016705; GO:0020037	metabolic process [GO:0008152]		heme binding [GO:0020037]; iron ion binding [GO:0005506]; monooxygenase activity [GO:0004497]; oxidoreductase activity, acting on paired donors, with incorporation or reduction of molecular oxygen [GO:0016705]
EN45_000400	6.042	0.8686	0.000151	0.0007849	A0A167V2D2_PENCH	Putative HC-toxin efflux carrier	536	GO:0016021; GO:0022857		integral component of membrane [GO:0016021]	transmembrane transporter activity [GO:0022857]
EN45_093690	6.029	-0.5816	2.269e-05	0.0001929	A0A167QUK5_PENCH	Putative peroxisomal-coenzyme A synthetase	1677	GO:0004475; GO:0016021; GO:0031177		integral component of membrane [GO:0016021]	mannose-1-phosphate guanylyltransferase activity [GO:0004475]; phosphopantetheine binding [GO:0031177]
EN45_075450	5.894	5.793	3.956e-08	4.276e-06	A0A167U5W7_PENCH	Bubble protein	88
EN45_056810	5.758	6.111	1.298e-11	2.925e-08	A0A167SFX1_PENCH	Aflatoxin B1 aldehyde reductase member	323	GO:0016491			oxidoreductase activity [GO:0016491]
EN45_057220	5.641	-1.835	2.281e-05	0.0001938	A0A167SH58_PENCH	Putative endo-1,3(4)-beta-glucanase	324	GO:0004553; GO:0005886; GO:0005975; GO:0031225	carbohydrate metabolic process [GO:0005975]	anchored component of membrane [GO:0031225]; plasma membrane [GO:0005886]	hydrolase activity, hydrolyzing O-glycosyl compounds [GO:0004553]
EN45_053080	5.572	0.1346	7.93e-06	9.501e-05	A0A167S4F2_PENCH	Linear gramicidin synthase subunit D	1032	GO:0009058; GO:0031177	biosynthetic process [GO:0009058]		phosphopantetheine binding [GO:0031177]
EN45_026560	5.569	1.924	4.73e-06	6.783e-05	A0A167X7F9_PENCH	Fumarylacetoacetate hydrolase domain-containing protein 2-like protein	305	GO:0016787			hydrolase activity [GO:0016787]
EN45_058310	5.493	-0.9446	0.0001357	0.0007215	A0A167SJY5_PENCH	CAP10 domain-containing protein	103
EN45_076370	5.475	-0.615	0.0003301	0.001443	A0A167U941_PENCH	Putative amidohydrolase YtcJ	540	GO:0016810			hydrolase activity, acting on carbon-nitrogen (but not peptide) bonds [GO:0016810]
EN45_023730	5.449	7.035	5.796e-08	5.028e-06	A0A167WZ01_PENCH	Hce2 domain-containing protein	114
EN45_041860	5.44	-1.404	0.0007288	0.002708	A0A167YDY1_PENCH	Uncharacterized protein	175
EN45_081450	5.38	-0.5285	1.674e-05	0.0001565	A0A167UR25_PENCH	Multifunctional fusion protein [Includes: L-glutamate gamma-semialdehyde dehydrogenase (EC 1.2.1.88) (L-glutamate gamma-semialdehyde dehydrogenase); Delta-1-pyrroline-5-carboxylate dehydrogenase (P5C dehydrogenase)]	542	GO:0003842; GO:0010133	proline catabolic process to glutamate [GO:0010133]		1-pyrroline-5-carboxylate dehydrogenase activity [GO:0003842]
EN45_108750	5.353	2.614	4.784e-05	0.0003281	A0A167PSU5_PENCH	Secreted protein	120
EN45_046760	5.306	-0.1941	1.668e-05	0.0001562	A0A167YSQ7_PENCH	Zn(2)-C6 fungal-type domain-containing protein	498	GO:0000981; GO:0003677; GO:0005634; GO:0008270		nucleus [GO:0005634]	DNA binding [GO:0003677]; DNA-binding transcription factor activity, RNA polymerase II-specific [GO:0000981]; zinc ion binding [GO:0008270]
EN45_039400	5.221	2.67	1.009e-07	6.912e-06	A0A167YA72_PENCH	Putative transporter YgaY	489	GO:0016021; GO:0022857		integral component of membrane [GO:0016021]	transmembrane transporter activity [GO:0022857]
EN45_001030	5.203	0.02554	4.123e-05	0.0002929	A0A167V4J5_PENCH	Putative 12-oxophytodienoate reductase	458	GO:0010181; GO:0016491			FMN binding [GO:0010181]; oxidoreductase activity [GO:0016491]
EN45_082420	5.196	-1.321	0.0001125	0.0006231	A0A167UTJ7_PENCH	A_deaminase domain-containing protein	342
EN45_037760	5.185	-1.217	0.0001884	0.0009249	A0A167Y5C0_PENCH	Sterol 3-beta-glucosyltransferase	812	GO:0005975; GO:0008194; GO:0016758; GO:0030259	carbohydrate metabolic process [GO:0005975]; lipid glycosylation [GO:0030259]		hexosyltransferase activity [GO:0016758]; UDP-glycosyltransferase activity [GO:0008194]
EN45_113290	5.132	3.22	0.0001194	0.0006511	A0A162BEM7_PENCH	Small secreted protein	97
EN45_049830	5.116	1.66	3.018e-05	0.0002353	A0A167RUF5_PENCH	RING-type domain-containing protein	184	GO:0006511; GO:0008270; GO:0016021; GO:0016567	protein ubiquitination [GO:0016567]; ubiquitin-dependent protein catabolic process [GO:0006511]	integral component of membrane [GO:0016021]	zinc ion binding [GO:0008270]
EN45_060830	5.1	2.77	1.25e-07	7.889e-06	A0A167STH3_PENCH	Similar to	809	GO:0016021		integral component of membrane [GO:0016021]
EN45_003700	5.079	5.384	6.683e-11	8.341e-08	A0A167VBI7_PENCH	DUF1275 domain protein	249	GO:0016021		integral component of membrane [GO:0016021]
EN45_050080	5.052	-0.005566	0.0001673	0.0008499	A0A167UXZ1_PENCH	Ricin B-type lectin domain-containing protein	148
EN45_084190	5.052	1.918	1.216e-05	0.0001247	A0A167RV47_PENCH	ANK_REP_REGION domain-containing protein	580
EN45_027690	5.027	4.464	2.019e-09	7.816e-07	A0A167XAS9_PENCH	Putative dipeptidyl-peptidase	772	GO:0006508; GO:0008236; GO:0016021	proteolysis [GO:0006508]	integral component of membrane [GO:0016021]	serine-type peptidase activity [GO:0008236]
EN45_064800	4.968	-1.58	0.0001339	0.0007154	A0A167T5Y3_PENCH	RTA1 like protein	273	GO:0016021		integral component of membrane [GO:0016021]
EN45_081570	4.864	-0.1232	0.0003974	0.001674	A0A167URD0_PENCH	Apple domain-containing protein	426
EN45_045940	4.826	3.939	5.404e-06	7.424e-05	A0A161ZNU8_PENCH	Putative secreted protein	158
EN45_114790	4.763	2.623	6.583e-06	8.457e-05	A0A167Q5T3_PENCH	Sugar transporter	527	GO:0008643; GO:0016021; GO:0022857	carbohydrate transport [GO:0008643]	integral component of membrane [GO:0016021]	transmembrane transporter activity [GO:0022857]
EN45_080850	4.75	3.947	0.001056	0.003656	A0A167UPC9_PENCH	Putative transporter	519	GO:0016021; GO:0022857		integral component of membrane [GO:0016021]	transmembrane transporter activity [GO:0022857]
EN45_021350	4.698	4.57	9.281e-10	4.86e-07	A0A167WSB3_PENCH	Beta-mannosidase (EC 3.2.1.25)	636	GO:0004553; GO:0005576; GO:0005975	carbohydrate metabolic process [GO:0005975]	extracellular region [GO:0005576]	hydrolase activity, hydrolyzing O-glycosyl compounds [GO:0004553]
EN45_000900	4.69	-0.4695	0.0007449	0.002756	A0A167V405_PENCH	D-amino-acid oxidase	349	GO:0003884; GO:0046416; GO:0071949	D-amino acid metabolic process [GO:0046416]		D-amino-acid oxidase activity [GO:0003884]; FAD binding [GO:0071949]
EN45_038700	4.656	3.668	4.933e-08	4.722e-06	A0A167Y8A3_PENCH	Putative glycosyl hydrolase	745	GO:0000272; GO:0004553; GO:0005576; GO:0016042; GO:1901136	carbohydrate derivative catabolic process [GO:1901136]; lipid catabolic process [GO:0016042]; polysaccharide catabolic process [GO:0000272]	extracellular region [GO:0005576]	hydrolase activity, hydrolyzing O-glycosyl compounds [GO:0004553]
EN45_003690	4.655	4.437	4.526e-08	4.527e-06	A0A167VBH5_PENCH	Aldehyde dehydrogenase	381	GO:0016620			oxidoreductase activity, acting on the aldehyde or oxo group of donors, NAD or NADP as acceptor [GO:0016620]
EN45_115160	4.625	6.575	2.554e-07	1.176e-05	A0A167Q6L8_PENCH	Sugar transporter	542	GO:0008643; GO:0016021; GO:0022857	carbohydrate transport [GO:0008643]	integral component of membrane [GO:0016021]	transmembrane transporter activity [GO:0022857]
EN45_064980	4.575	3.558	9.464e-08	6.794e-06	A0A167T6I6_PENCH	Peptide hydrolase (EC 3.4.-.-)	493	GO:0004177; GO:0006508; GO:0008235; GO:0046872	proteolysis [GO:0006508]		aminopeptidase activity [GO:0004177]; metal ion binding [GO:0046872]; metalloexopeptidase activity [GO:0008235]
EN45_075650	4.548	-0.4118	0.0006401	0.002432	A0A167U6L6_PENCH	NADPH--cytochrome P450 reductase (EC 1.6.2.4)	707	GO:0003958; GO:0005789; GO:0005886; GO:0010181; GO:0016021; GO:0016126	sterol biosynthetic process [GO:0016126]	endoplasmic reticulum membrane [GO:0005789]; integral component of membrane [GO:0016021]; plasma membrane [GO:0005886]	FMN binding [GO:0010181]; NADPH-hemoprotein reductase activity [GO:0003958]
EN45_039060	4.542	4.119	9.543e-07	2.536e-05	A0A167Y9C5_PENCH	Riboflavin transporter	434	GO:0016021; GO:0022857		integral component of membrane [GO:0016021]	transmembrane transporter activity [GO:0022857]
EN45_005290	4.515	5.063	8.943e-10	4.86e-07	A0A169X2V7_PENCH	Extradiol ring-cleavage dioxygenase	369	GO:0006725; GO:0008198; GO:0008270; GO:0016021; GO:0016701; GO:0051213	cellular aromatic compound metabolic process [GO:0006725]	integral component of membrane [GO:0016021]	dioxygenase activity [GO:0051213]; ferrous iron binding [GO:0008198]; oxidoreductase activity, acting on single donors with incorporation of molecular oxygen [GO:0016701]; zinc ion binding [GO:0008270]
EN45_014390	4.459	-0.8971	0.004779	0.01237	A0A161ZGV4_PENCH	Chitin deacetylase	255	GO:0005975; GO:0016810	carbohydrate metabolic process [GO:0005975]		hydrolase activity, acting on carbon-nitrogen (but not peptide) bonds [GO:0016810]
EN45_026520	4.446	-0.7809	0.003385	0.009345	A0A167X7C5_PENCH	Trans-3-hydroxy-L-proline dehydratase	348
EN45_028270	4.436	6.162	3.71e-09	1.065e-06	A0A161ZJX6_PENCH	Uncharacterized protein in dcmA 3'region	296	GO:0016491			oxidoreductase activity [GO:0016491]
EN45_056270	4.434	3.806	7.354e-08	5.927e-06	A0A167SEH3_PENCH	O-methylsterigmatocystin oxidoreductase	537	GO:0004497; GO:0005506; GO:0016705; GO:0020037			heme binding [GO:0020037]; iron ion binding [GO:0005506]; monooxygenase activity [GO:0004497]; oxidoreductase activity, acting on paired donors, with incorporation or reduction of molecular oxygen [GO:0016705]
EN45_043500	4.41	-1.807	0.0004216	0.00175	A0A167YIC8_PENCH	Uncharacterized protein	174
EN45_023010	4.396	-0.4589	0.0002199	0.001045	A0A167WWY4_PENCH	DUF4158 domain-containing protein	138
EN45_031170	4.385	-1.45	0.00109	0.003744	A0A167XLA8_PENCH	NTF2-related export protein	161	GO:0006913	nucleocytoplasmic transport [GO:0006913]
EN45_003040	4.374	-0.7167	0.0009972	0.003488	A0A167V9R8_PENCH	Pyridoxal kinase (EC 2.7.1.35)	343	GO:0008478; GO:0009443; GO:0016310	phosphorylation [GO:0016310]; pyridoxal 5'-phosphate salvage [GO:0009443]		pyridoxal kinase activity [GO:0008478]
EN45_005810	4.372	0.3063	0.0006866	0.002579	A0A169X5N0_PENCH	INVERT_DEFENSINS domain-containing protein	71	GO:0006952	defense response [GO:0006952]
EN45_021680	4.219	-0.7696	0.0002684	0.001224	A0A167WTB8_PENCH	Putative oxidoreductase	374	GO:0016491			oxidoreductase activity [GO:0016491]
EN45_058950	4.207	8.2	5.781e-11	8.341e-08	A0A167SLX7_PENCH	Dopa 4,5-dioxygenase	173
EN45_094760	4.194	3.529	5.731e-08	5.028e-06	A0A167QXD2_PENCH	RING-type domain-containing protein	306	GO:0004842; GO:0046872			metal ion binding [GO:0046872]; ubiquitin-protein transferase activity [GO:0004842]
EN45_062080	4.182	-0.4849	0.0007912	0.002896	A0A167SXB1_PENCH	Gag_pre-integrs domain-containing protein	225
EN45_058450	4.108	0.08658	0.000464	0.001889	A0A167SKC9_PENCH	26S proteasome regulatory subunit N7	232
EN45_076350	4.1	0.7799	0.0004798	0.001936	A0A167U913_PENCH	Putative secreted protein	206
EN45_093720	4.079	0.2264	0.0002472	0.001148	A0A162CQV7_PENCH	AA1-like domain-containing protein	153
EN45_029090	4.033	5.405	3.148e-10	2.156e-07	A0A167XF29_PENCH	Phenol 2-monooxygenase	678	GO:0004497; GO:0044550; GO:0071949	secondary metabolite biosynthetic process [GO:0044550]		FAD binding [GO:0071949]; monooxygenase activity [GO:0004497]
EN45_031230	4.024	-0.4891	0.0002573	0.001183	A0A167XLG8_PENCH	Endo-beta-1,4-glucanase D (Endoglucanase D) (EC 3.2.1.4) (Carboxymethylcellulase D) (Cellulase D)	245	GO:0005576; GO:0008810; GO:0030245; GO:0030248	cellulose catabolic process [GO:0030245]	extracellular region [GO:0005576]	cellulase activity [GO:0008810]; cellulose binding [GO:0030248]
EN45_012380	3.986	-0.8215	0.0001195	0.0006511	A0A167W087_PENCH	Uncharacterized protein	273
EN45_039090	3.956	5.025	4.992e-08	4.728e-06	A0A167Y9E8_PENCH	Similar to	455
EN45_077790	3.947	-1.097	0.003297	0.009144	A0A167UEB0_PENCH	Uncharacterized protein	397
EN45_022290	3.867	1.294	1.103e-05	0.0001174	A0A167WUY2_PENCH	RanBD1 domain-containing protein	293
EN45_039950	3.845	-0.7634	0.0003372	0.001468	A0A167YBM9_PENCH	Acetate permease A	278	GO:0016021		integral component of membrane [GO:0016021]
EN45_082020	3.841	2.238	0.001373	0.004495	A0A167USG7_PENCH	TACC_C domain-containing protein	858
EN45_078750	3.809	-0.8608	0.0004831	0.001946	A0A167UHE9_PENCH	MFS domain-containing protein	143	GO:0016021		integral component of membrane [GO:0016021]
EN45_108740	3.791	-1.217	0.002603	0.007544	A0A161Z352_PENCH	Glycoside hydrolase family 39 protein	469	GO:0005576		extracellular region [GO:0005576]
EN45_092010	3.781	-0.6973	0.0003792	0.001613	A0A162C163_PENCH	Uncharacterized protein	176	GO:0016021		integral component of membrane [GO:0016021]
EN45_016290	3.76	7.043	0.007411	0.01761	A0A167WCK1_PENCH	Mutanase	636	GO:0051118			glucan endo-1,3-alpha-glucosidase activity [GO:0051118]
EN45_085680	3.742	1.567	0.0001144	0.0006301	A0A162CPA1_PENCH	ABC transporter	1463	GO:0005524; GO:0005886; GO:0016021; GO:0140359		integral component of membrane [GO:0016021]; plasma membrane [GO:0005886]	ABC-type transporter activity [GO:0140359]; ATP binding [GO:0005524]
EN45_104850	3.734	-0.05338	0.0002779	0.001258	A0A162CLZ1_PENCH	NADH oxidase	444	GO:0010181; GO:0016491			FMN binding [GO:0010181]; oxidoreductase activity [GO:0016491]
EN45_015970	3.73	-0.8541	0.005622	0.01409	A0A167PNW3_PENCH	Secreted protein	179
EN45_106650	3.73	5.346	9.455e-09	1.763e-06	A0A167WBN7_PENCH	Transposase	145
EN45_012440	3.72	6.649	1.896e-10	1.407e-07	A0A167W0F8_PENCH	ABC transporter G family member	1480	GO:0005524; GO:0005886; GO:0016021; GO:0140359		integral component of membrane [GO:0016021]; plasma membrane [GO:0005886]	ABC-type transporter activity [GO:0140359]; ATP binding [GO:0005524]
EN45_074450	3.703	-0.5365	0.005438	0.0137	A0A167U2J6_PENCH	3-dehydroshikimate dehydratase	331
EN45_038230	3.698	1.629	1.946e-05	0.0001741	A0A167Y6S1_PENCH	Transmembrane protein	147	GO:0016021		integral component of membrane [GO:0016021]
EN45_072870	3.677	7.236	7.317e-11	8.341e-08	A0A167TX47_PENCH	Glutathione S-transferase omega-1	236	GO:0016740			transferase activity [GO:0016740]
EN45_087220	3.652	-0.4096	0.0007363	0.002728	A0A167QC12_PENCH	Secreted protein	316
EN45_096170	3.636	-0.5072	0.0008022	0.002923	A0A167R190_PENCH	Demethylsterigmatocystin 6-O-methyltransferase	247	GO:0008171; GO:0032259	methylation [GO:0032259]		O-methyltransferase activity [GO:0008171]
EN45_077080	3.62	-0.9149	0.0006355	0.002425	A0A167UBM0_PENCH	Putative glycosidase	370	GO:0004553; GO:0005886; GO:0005975; GO:0016021; GO:0031225	carbohydrate metabolic process [GO:0005975]	anchored component of membrane [GO:0031225]; integral component of membrane [GO:0016021]; plasma membrane [GO:0005886]	hydrolase activity, hydrolyzing O-glycosyl compounds [GO:0004553]
EN45_045830	3.603	2.748	2.781e-06	5.012e-05	A0A167YQ14_PENCH	Adenosine deaminase CECR1-A	590	GO:0019239			deaminase activity [GO:0019239]
EN45_053170	3.6	-1.206	0.001409	0.004597	A0A167S4J2_PENCH	Lactam utilization protein	255	GO:0005975	carbohydrate metabolic process [GO:0005975]
EN45_051510	3.588	6.219	7.35e-09	1.596e-06	A0A167RZL7_PENCH	Secreted protein	111
EN45_062880	3.546	2.453	1.101e-06	2.77e-05	A0A167SZR9_PENCH	DUF4219 domain-containing protein	577
EN45_014940	3.536	3.579	1.443e-07	8.56e-06	A0A167W7Y2_PENCH	DSBA domain-containing protein	232	GO:0016491			oxidoreductase activity [GO:0016491]
EN45_081460	3.501	0.48	0.001073	0.003705	A0A167UR38_PENCH	Proline dehydrogenase (EC 1.5.5.2)	426	GO:0004657; GO:0006562	proline catabolic process [GO:0006562]		proline dehydrogenase activity [GO:0004657]
EN45_108730	3.498	-0.5133	0.000993	0.003477	A0A167PST2_PENCH	Chitinase	203
EN45_057250	3.455	2.209	4.383e-05	0.0003071	A0A167SH91_PENCH	Asparaginase (EC 3.5.1.1)	379	GO:0004067; GO:0006530; GO:0110165	asparagine catabolic process [GO:0006530]	cellular anatomical entity [GO:0110165]	asparaginase activity [GO:0004067]
EN45_059000	3.424	7.302	9.37e-11	8.341e-08	A0A167SM19_PENCH	Glutaminase A	687	GO:0005975	carbohydrate metabolic process [GO:0005975]
EN45_057720	3.416	3.587	7.625e-07	2.24e-05	A0A167SIB3_PENCH	Putative quinate permease	547	GO:0016021; GO:0022857		integral component of membrane [GO:0016021]	transmembrane transporter activity [GO:0022857]
EN45_038690	3.406	-0.6696	0.003016	0.008496	A0A167Y897_PENCH	Alpha-L-rhamnosidase C	376	GO:0016021		integral component of membrane [GO:0016021]
EN45_108060	3.387	0.5114	5.304e-05	0.0003553	A0A162CMM7_PENCH	Putative MFS-type transporter	762	GO:0006807; GO:0016021; GO:0022857	nitrogen compound metabolic process [GO:0006807]	integral component of membrane [GO:0016021]	transmembrane transporter activity [GO:0022857]
EN45_085460	3.376	-0.3346	0.0008222	0.002978	A0A167Q738_PENCH	Putative NADPH dehydrogenase	413	GO:0003959; GO:0010181; GO:0050661			FMN binding [GO:0010181]; NADP binding [GO:0050661]; NADPH dehydrogenase activity [GO:0003959]
EN45_049180	3.371	2.169	1.969e-05	0.0001758	A0A167RSR6_PENCH	Putative transporter	532	GO:0016021; GO:0022857		integral component of membrane [GO:0016021]	transmembrane transporter activity [GO:0022857]
EN45_055220	3.37	3.856	8.005e-08	6.25e-06	A0A167SAT7_PENCH	Sm domain-containing protein	141
EN45_112800	3.361	3.318	9.38e-07	2.523e-05	A0A167Q1B7_PENCH	Ricin B-type lectin domain-containing protein	167
EN45_077430	3.359	9.702	5.322e-09	1.365e-06	A0A167UD04_PENCH	Salivary secreted protein	62
EN45_056370	3.358	6.096	2.883e-09	9.504e-07	A0A167SER0_PENCH	Protein TOXD	345	GO:0016491			oxidoreductase activity [GO:0016491]
EN45_069590	3.351	6.942	1.121e-09	5.546e-07	A0A167TKX5_PENCH	Putative quinone oxidoreductase	383	GO:0008270; GO:0016491			oxidoreductase activity [GO:0016491]; zinc ion binding [GO:0008270]
EN45_053110	3.34	1.113	9.413e-06	0.0001058	A0A167S4G3_PENCH	Peroxisomal membrane protein	425
EN45_101940	3.33	0.923	2.912e-05	0.0002304	A0A167RHQ8_PENCH	GPI anchored protein	328	GO:0016021		integral component of membrane [GO:0016021]
EN45_023000	3.329	3.05	1.731e-06	3.696e-05	A0A167WWX4_PENCH	Putative N-acetyltransferase	241	GO:0016407			acetyltransferase activity [GO:0016407]
EN45_103650	3.305	4.319	0.0002511	0.001159	A0A167RLW8_PENCH	EthD domain-containing protein	137	GO:0016491			oxidoreductase activity [GO:0016491]
EN45_022980	3.288	1.01	3.469e-05	0.0002589	A0A167WWU4_PENCH	Major allergen Asp f	289	GO:0008237			metallopeptidase activity [GO:0008237]
EN45_029010	3.284	-0.8806	0.004883	0.01258	A0A167XEV6_PENCH	Uncharacterized protein	296
EN45_049160	3.279	4.313	5.52e-09	1.365e-06	A0A167RSP5_PENCH	Uncharacterized protein	329	GO:0016021		integral component of membrane [GO:0016021]
EN45_068430	3.276	0.6206	0.002223	0.006625	A0A167TH93_PENCH	DUF3074 domain-containing protein	338
EN45_019730	3.26	9.572	4.774e-10	3.036e-07	A0A167WMC0_PENCH	Disulfide-bond oxidoreductase YfcG	252
EN45_075460	3.254	6.456	1.061e-07	7.122e-06	A0A167U5X7_PENCH	Putative drug/proton antiporter	509	GO:0016021; GO:0022857		integral component of membrane [GO:0016021]	transmembrane transporter activity [GO:0022857]
EN45_077420	3.25	4.814	4.285e-07	1.583e-05	A0A167UCY6_PENCH	Protein kinase domain-containing protein	404
EN45_024640	3.239	1.344	5.164e-05	0.0003483	A0A167X1U6_PENCH	Alternative oxidase (EC 1.-.-.-)	331	GO:0005743; GO:0009916; GO:0016021; GO:0046872; GO:0070469		integral component of membrane [GO:0016021]; mitochondrial inner membrane [GO:0005743]; respirasome [GO:0070469]	alternative oxidase activity [GO:0009916]; metal ion binding [GO:0046872]
EN45_065010	3.234	5.564	1.028e-08	1.868e-06	A0A167T6L9_PENCH	Amidase (EC 3.5.1.4)	538	GO:0004040; GO:0043864			amidase activity [GO:0004040]; indoleacetamide hydrolase activity [GO:0043864]
EN45_105140	3.233	1.245	5.872e-05	0.0003848	A0A167PKI6_PENCH	Protein ecm33	448
EN45_088320	3.2	-1.258	0.001415	0.004607	A0A167QFA7_PENCH	Alpha/beta hydrolase	348
EN45_045720	3.196	0.1788	0.002281	0.006772	A0A167YPU6_PENCH	Tautomerase/MIF	327
EN45_023030	3.187	0.3957	5.979e-05	0.0003885	A0A167WWZ4_PENCH	Epiglycanin_C domain-containing protein	545
EN45_092840	3.176	6.409	3.267e-09	1.039e-06	A0A167QS73_PENCH	Maleylacetoacetate isomerase	226	GO:0005737; GO:0009072; GO:0016853	aromatic amino acid family metabolic process [GO:0009072]	cytoplasm [GO:0005737]	isomerase activity [GO:0016853]
EN45_023290	3.16	-0.2654	0.0008701	0.003112	A0A167WXP7_PENCH	Putative formamidase	317	GO:0016811			hydrolase activity, acting on carbon-nitrogen (but not peptide) bonds, in linear amides [GO:0016811]
EN45_088230	3.138	-0.5261	0.01854	0.03736	A0A167QF07_PENCH	Putative transporter	561	GO:0016021; GO:0022857		integral component of membrane [GO:0016021]	transmembrane transporter activity [GO:0022857]
EN45_082510	3.121	-0.3868	0.0007883	0.002889	A0A161ZCL2_PENCH	Secreted protein	119
EN45_025060	3.112	1.2	4.245e-05	0.0002997	A0A167X307_PENCH	Ribonuclease	144	GO:0004525; GO:0006396	RNA processing [GO:0006396]		ribonuclease III activity [GO:0004525]
EN45_037700	3.104	8.048	3.57e-06	5.789e-05	A0A167Y545_PENCH	Choline monooxygenase, chloroplastic (EC 1.14.15.7)	420	GO:0005506; GO:0019133; GO:0019285; GO:0051537	glycine betaine biosynthetic process from choline [GO:0019285]		2 iron, 2 sulfur cluster binding [GO:0051537]; choline monooxygenase activity [GO:0019133]; iron ion binding [GO:0005506]
EN45_032550	3.103	1.382	7.707e-05	0.0004674	A0A161ZL29_PENCH	Calcium/calmodulin-dependent protein kinase	542	GO:0004672; GO:0005524; GO:0006468	protein phosphorylation [GO:0006468]		ATP binding [GO:0005524]; protein kinase activity [GO:0004672]
EN45_103640	3.086	7.662	0.009925	0.02227	A0A167RLW5_PENCH	Chitinase (EC 3.2.1.14)	427	GO:0000272; GO:0004568; GO:0005576; GO:0006032; GO:0008061	chitin catabolic process [GO:0006032]; polysaccharide catabolic process [GO:0000272]	extracellular region [GO:0005576]	chitin binding [GO:0008061]; chitinase activity [GO:0004568]
EN45_021530	3.084	11.62	8.402e-08	6.285e-06	A0A167WSX5_PENCH	D-arabinitol 2-dehydrogenase	286	GO:0016491			oxidoreductase activity [GO:0016491]
EN45_005550	3.076	0.9681	0.001553	0.004979	A0A167WTF4_PENCH	AB hydrolase-1 domain-containing protein	252
EN45_021730	3.076	5.122	6.674e-09	1.523e-06	A0A169X4N1_PENCH	Putative FAD-linked oxidoreductase	577	GO:0016491; GO:0071949			FAD binding [GO:0071949]; oxidoreductase activity [GO:0016491]
EN45_012430	3.038	2.6	9.753e-07	2.561e-05	A0A167W0E9_PENCH	Metal homeostasis factor	79	GO:0046872			metal ion binding [GO:0046872]
EN45_098040	3.038	-0.5796	0.004139	0.01101	A0A167R6F1_PENCH	DUF3140 domain-containing protein	96
EN45_049640	3.032	3.418	1.793e-05	0.0001635	A0A167RTX6_PENCH	Uncharacterized protein	365
EN45_002750	3.028	2.664	3.665e-06	5.861e-05	A0A167V8Z1_PENCH	DUF4219 domain-containing protein	559
EN45_088150	3.023	4.602	2.846e-08	3.519e-06	A0A167QET0_PENCH	Calcium-transporting ATPase (EC 7.2.2.10)	1031	GO:0005388; GO:0005524; GO:0016021; GO:0016887		integral component of membrane [GO:0016021]	ATP binding [GO:0005524]; ATP hydrolysis activity [GO:0016887]; P-type calcium transporter activity [GO:0005388]
EN45_003120	3.018	6.752	1.09e-07	7.241e-06	A0A167V9Z6_PENCH	Similar to	56
EN45_110240	3.018	-0.5454	0.003113	0.008716	A0A167PW57_PENCH	Putative sterigmatocystin biosynthesis monooxygenase stcW	628	GO:0004499; GO:0050660; GO:0050661			flavin adenine dinucleotide binding [GO:0050660]; N,N-dimethylaniline monooxygenase activity [GO:0004499]; NADP binding [GO:0050661]
EN45_087560	3.012	0.6352	0.005839	0.01452	A0A167QD13_PENCH	Trafficking protein particle complex subunit 13	186
EN45_006250	2.99	3.44	1.206e-06	2.957e-05	A0A169X7M1_PENCH	Lectin_legB domain-containing protein	246
EN45_046770	2.987	2.785	3.56e-07	1.402e-05	A0A167YSR6_PENCH	Zinc-binding alcohol dehydrogenase domain-containing protein	412	GO:0016491			oxidoreductase activity [GO:0016491]
EN45_110250	2.983	-0.787	0.003143	0.008781	A0A167PW72_PENCH	Putative transporter	503	GO:0016021; GO:0022857		integral component of membrane [GO:0016021]	transmembrane transporter activity [GO:0022857]
EN45_051840	2.98	2.604	1.089e-05	0.0001164	A0A167S0I3_PENCH	Amidase (EC 3.5.1.4)	582	GO:0004040; GO:0043864			amidase activity [GO:0004040]; indoleacetamide hydrolase activity [GO:0043864]
EN45_113420	2.977	1.63	2.141e-05	0.0001863	A0A167Q2X0_PENCH	SET domain-containing protein	568
EN45_020440	2.97	1.552	3.987e-05	0.0002858	A0A167WPK1_PENCH	Hydroxyacid oxidase	351	GO:0010181; GO:0016491			FMN binding [GO:0010181]; oxidoreductase activity [GO:0016491]
EN45_049820	2.951	3.203	3.253e-06	5.446e-05	A0A167RUE9_PENCH	Sodium transport ATPase	1082	GO:0005524; GO:0016021; GO:0016887; GO:0019829		integral component of membrane [GO:0016021]	ATP binding [GO:0005524]; ATP hydrolysis activity [GO:0016887]; ATPase-coupled cation transmembrane transporter activity [GO:0019829]
EN45_106620	2.946	-0.2555	0.006106	0.01506	A0A167PNU9_PENCH	Putative transcriptional regulatory protein	385	GO:0003677; GO:0006351; GO:0008270	DNA-templated transcription [GO:0006351]		DNA binding [GO:0003677]; zinc ion binding [GO:0008270]
EN45_102710	2.944	-0.7569	0.003113	0.008716	A0A167RJJ4_PENCH	Protein NLRC3	490
EN45_015800	2.939	6.341	2.215e-08	3.13e-06	A0A167WB50_PENCH	Sugar transporter	553	GO:0008643; GO:0016021; GO:0022857	carbohydrate transport [GO:0008643]	integral component of membrane [GO:0016021]	transmembrane transporter activity [GO:0022857]
EN45_046140	2.921	-0.4976	0.005084	0.01297	A0A161ZNX0_PENCH	BZIP domain-containing protein	165
EN45_004240	2.897	-1.024	0.01048	0.0233	A0A161ZEF6_PENCH	Polyamine transporter	474	GO:0016021; GO:0022857		integral component of membrane [GO:0016021]	transmembrane transporter activity [GO:0022857]
EN45_039840	2.879	5.305	5.404e-07	1.822e-05	A0A167YBC7_PENCH	MFS domain-containing protein	467	GO:0016021; GO:0022857		integral component of membrane [GO:0016021]	transmembrane transporter activity [GO:0022857]
EN45_041310	2.862	-0.6968	0.00481	0.01243	A0A169XD29_PENCH	Putative AC transposase	492	GO:0046983			protein dimerization activity [GO:0046983]
EN45_038240	2.854	2.873	4.762e-07	1.689e-05	A0A167Y6T5_PENCH	Similar to	449	GO:0016021		integral component of membrane [GO:0016021]
EN45_004700	2.853	2.774	2.229e-06	4.277e-05	A0A167VEF3_PENCH	Non-specific serine/threonine protein kinase (EC 2.7.11.1)	1197	GO:0004674; GO:0005524; GO:0006468	protein phosphorylation [GO:0006468]		ATP binding [GO:0005524]; protein serine/threonine kinase activity [GO:0004674]
EN45_102460	2.842	8.623	3.201e-06	5.417e-05	A0A167RIX1_PENCH	RING-type domain-containing protein	572
EN45_085850	2.835	0.6416	0.008465	0.01959	A0A167Q8A8_PENCH	Regulatory protein	622	GO:0000981; GO:0003677; GO:0005634; GO:0008270		nucleus [GO:0005634]	DNA binding [GO:0003677]; DNA-binding transcription factor activity, RNA polymerase II-specific [GO:0000981]; zinc ion binding [GO:0008270]
EN45_019410	2.828	7.521	1.317e-07	8.085e-06	A0A167WLI3_PENCH	pH-response transcription factor pacC/RIM101	643	GO:0005634		nucleus [GO:0005634]
EN45_087210	2.808	1.115	3.573e-05	0.0002635	A0A162CPI8_PENCH	S5A_REDUCTASE domain-containing protein	345	GO:0006629; GO:0016021; GO:0016627	lipid metabolic process [GO:0006629]	integral component of membrane [GO:0016021]	oxidoreductase activity, acting on the CH-CH group of donors [GO:0016627]
EN45_003200	2.807	0.2094	0.0001542	0.0007951	A0A167VA71_PENCH	Uncharacterized protein	96
EN45_068290	2.804	1.2	0.001464	0.004729	A0A167TGT1_PENCH	DUF3047 domain-containing protein	239
EN45_092720	2.8	8.925	2.588e-07	1.176e-05	A0A162CQQ4_PENCH	Proline dehydrogenase (EC 1.5.5.2)	480	GO:0004657; GO:0006562	proline catabolic process [GO:0006562]		proline dehydrogenase activity [GO:0004657]
EN45_015900	2.792	5.379	4.699e-07	1.673e-05	A0A167WBI7_PENCH	IU_nuc_hydro domain-containing protein	438	GO:0006139; GO:0016799; GO:1901564	nucleobase-containing compound metabolic process [GO:0006139]; organonitrogen compound metabolic process [GO:1901564]		hydrolase activity, hydrolyzing N-glycosyl compounds [GO:0016799]
EN45_105260	2.781	5.542	7.821e-05	0.0004727	A0A162CM22_PENCH	Lipase	307	GO:0006629	lipid metabolic process [GO:0006629]
EN45_053190	2.778	1.409	0.0008259	0.002987	A0A167S4J8_PENCH	Putative urea carboxylase	1247	GO:0005524; GO:0016787; GO:0016874; GO:0046872			ATP binding [GO:0005524]; hydrolase activity [GO:0016787]; ligase activity [GO:0016874]; metal ion binding [GO:0046872]
EN45_023810	2.772	1.826	2.236e-05	0.0001917	A0A167WZ52_PENCH	Integral membrane protein	401	GO:0016021		integral component of membrane [GO:0016021]
EN45_095660	2.767	2.963	1.478e-06	3.356e-05	A0A167QZW4_PENCH	Aminotran_1_2 domain-containing protein	439	GO:0003824; GO:0009058; GO:0030170	biosynthetic process [GO:0009058]		catalytic activity [GO:0003824]; pyridoxal phosphate binding [GO:0030170]
EN45_025260	2.761	2.484	1.358e-06	3.168e-05	A0A167X3I4_PENCH	Protein ArsC	134
EN45_061970	2.756	4.435	3.977e-08	4.276e-06	A0A167SWZ8_PENCH	MARVEL domain-containing protein	167	GO:0016021		integral component of membrane [GO:0016021]
EN45_066110	2.744	1.884	0.000355	0.001527	A0A167T9Y6_PENCH	Uncharacterized protein	322
EN45_056260	2.743	2.468	5.845e-06	7.825e-05	A0A167SEG5_PENCH	Secreted protein	107
EN45_051530	2.734	1.473	2.247e-05	0.0001919	A0A167RZN4_PENCH	Sugar transporter	531	GO:0008643; GO:0016021; GO:0022857	carbohydrate transport [GO:0008643]	integral component of membrane [GO:0016021]	transmembrane transporter activity [GO:0022857]
EN45_109710	2.727	0.0751	0.006023	0.01491	A0A162CN05_PENCH	GPI ethanolamine phosphate transferase 2	785	GO:0006506; GO:0030176; GO:0051377	GPI anchor biosynthetic process [GO:0006506]	integral component of endoplasmic reticulum membrane [GO:0030176]	mannose-ethanolamine phosphotransferase activity [GO:0051377]
EN45_091850	2.717	3.386	1.579e-06	3.497e-05	A0A167QPT1_PENCH	General alpha-glucoside permease	566	GO:0016021; GO:0022857		integral component of membrane [GO:0016021]	transmembrane transporter activity [GO:0022857]
EN45_021740	2.706	10.69	1.455e-08	2.256e-06	A0A167WTG4_PENCH	Glucan endo-1,3-beta-glucosidase	426
EN45_105230	2.696	4.786	3.666e-08	4.08e-06	A0A167PKM0_PENCH	Putative peptide transporter	632	GO:0006857; GO:0016021; GO:0022857	oligopeptide transport [GO:0006857]	integral component of membrane [GO:0016021]	transmembrane transporter activity [GO:0022857]
EN45_075000	2.692	1.688	2.218e-05	0.0001915	A0A167U4C8_PENCH	Signal peptide protein	209	GO:0016021		integral component of membrane [GO:0016021]
EN45_113980	2.69	-1.011	0.001261	0.004196	A0A167Q4A6_PENCH	Similar to	208	GO:0006729; GO:0008124	tetrahydrobiopterin biosynthetic process [GO:0006729]		4-alpha-hydroxytetrahydrobiopterin dehydratase activity [GO:0008124]
EN45_105340	2.684	6.632	1.352e-07	8.246e-06	A0A167PKZ1_PENCH	Glutamate decarboxylase (EC 4.1.1.15)	492	GO:0004351; GO:0006536; GO:0030170	glutamate metabolic process [GO:0006536]		glutamate decarboxylase activity [GO:0004351]; pyridoxal phosphate binding [GO:0030170]
EN45_050280	2.671	3.013	7.997e-07	2.274e-05	A0A167RVV4_PENCH	Fungal_trans domain-containing protein	381
EN45_033660	2.665	2.798	1.546e-06	3.45e-05	A0A167XTQ3_PENCH	Putative transporter	513	GO:0016021; GO:0022857		integral component of membrane [GO:0016021]	transmembrane transporter activity [GO:0022857]
EN45_063590	2.663	1.12	0.01065	0.02359	A0A167T1V7_PENCH	Retrovirus-related Pol polyprotein from transposon TNT	705	GO:0003676			nucleic acid binding [GO:0003676]
EN45_088250	2.657	-0.7369	0.000869	0.003109	A0A167QF15_PENCH	Transmembrane protein	548	GO:0016021		integral component of membrane [GO:0016021]
EN45_001410	2.655	4.593	2.085e-07	1.054e-05	A0A167V5S8_PENCH	Tyrosine-protein phosphatase	316	GO:0004721; GO:0016311	dephosphorylation [GO:0016311]		phosphoprotein phosphatase activity [GO:0004721]
EN45_058870	2.649	4.335	1.431e-05	0.0001409	A0A167QJE8_PENCH	CENP-V/GFA domain-containing protein	144	GO:0016846; GO:0046872			carbon-sulfur lyase activity [GO:0016846]; metal ion binding [GO:0046872]
EN45_089960	2.649	6.699	6.184e-07	1.966e-05	A0A167SLP6_PENCH	AB hydrolase-1 domain-containing protein	288
EN45_103050	2.637	1.309	0.0001587	0.0008145	A0A167RKF5_PENCH	Putative amidase	545
EN45_007440	2.626	2.978	1.405e-05	0.0001393	A0A167VKC7_PENCH	Sterol uptake control protein	384	GO:0000981; GO:0003677; GO:0005634; GO:0008270		nucleus [GO:0005634]	DNA binding [GO:0003677]; DNA-binding transcription factor activity, RNA polymerase II-specific [GO:0000981]; zinc ion binding [GO:0008270]
EN45_010040	2.621	2.848	9.738e-05	0.0005597	A0A167VTL9_PENCH	Uncharacterized protein	67
EN45_037910	2.62	6.068	2.159e-07	1.074e-05	A0A167Y5R1_PENCH	Fungal_trans domain-containing protein	639	GO:0016021		integral component of membrane [GO:0016021]
EN45_003540	2.608	0.2532	0.007408	0.0176	A0A167VB35_PENCH	Gag_p10 domain-containing protein	90
EN45_073760	2.601	0.6166	0.0004216	0.00175	A0A167U0D2_PENCH	Secreted protein	387
EN45_092850	2.589	5.773	7.78e-09	1.649e-06	A0A162C1D1_PENCH	Fumarylacetoacetase (EC 3.7.1.2) (Fumarylacetoacetate hydrolase)	429	GO:0004334; GO:0006559; GO:0006572; GO:0046872	L-phenylalanine catabolic process [GO:0006559]; tyrosine catabolic process [GO:0006572]		fumarylacetoacetase activity [GO:0004334]; metal ion binding [GO:0046872]
EN45_094700	2.585	2.171	0.0001178	0.0006447	A0A167QX85_PENCH	Putative transcriptional regulatory protein	776	GO:0000981; GO:0003677; GO:0005634; GO:0008270		nucleus [GO:0005634]	DNA binding [GO:0003677]; DNA-binding transcription factor activity, RNA polymerase II-specific [GO:0000981]; zinc ion binding [GO:0008270]
EN45_039760	2.578	1.496	0.0001466	0.0007696	A0A167YB54_PENCH	Integral membrane protein	231	GO:0016021		integral component of membrane [GO:0016021]
EN45_038180	2.575	-0.4807	0.01559	0.03224	A0A167SJB1_PENCH	RT_RNaseH domain-containing protein	103
EN45_058060	2.575	-1.046	0.007754	0.01827	A0A167Y6M3_PENCH	Cyclase	334	GO:0004061; GO:0019441	tryptophan catabolic process to kynurenine [GO:0019441]		arylformamidase activity [GO:0004061]
EN45_071110	2.565	3.044	2.89e-05	0.0002294	A0A167TR96_PENCH	Iron transport multicopper oxidase	608	GO:0005507; GO:0006811; GO:0016021; GO:0016491	ion transport [GO:0006811]	integral component of membrane [GO:0016021]	copper ion binding [GO:0005507]; oxidoreductase activity [GO:0016491]
EN45_069220	2.56	-0.5487	0.01326	0.02821	A0A167TJR3_PENCH	Putative transporter	501	GO:0016021; GO:0022857		integral component of membrane [GO:0016021]	transmembrane transporter activity [GO:0022857]
EN45_080500	2.557	0.4922	0.02318	0.045	A0A167UN76_PENCH	4-hydroxy-tetrahydrodipicolinate synthase	310	GO:0016829			lyase activity [GO:0016829]
EN45_033400	2.551	-0.5899	0.002494	0.007298	A0A167XSX9_PENCH	Intradiol ring-cleavage dioxygenase	364	GO:0005506; GO:0016702			iron ion binding [GO:0005506]; oxidoreductase activity, acting on single donors with incorporation of molecular oxygen, incorporation of two atoms of oxygen [GO:0016702]
EN45_087620	2.551	-0.1718	0.005069	0.01294	A0A167QD87_PENCH	Integrase catalytic domain-containing protein	267
EN45_076260	2.547	3.89	0.0001141	0.0006296	A0A167U8S1_PENCH	But2 domain-containing protein	128
EN45_071500	2.544	3.08	4.623e-06	6.68e-05	A0A167TSK0_PENCH	Acetyltransferase	202	GO:0016740			transferase activity [GO:0016740]
EN45_001460	2.542	5.285	7.922e-07	2.268e-05	A0A161ZDP1_PENCH	Chitinase (EC 3.2.1.14)	1077	GO:0000272; GO:0004568; GO:0005576; GO:0006032; GO:0008061	chitin catabolic process [GO:0006032]; polysaccharide catabolic process [GO:0000272]	extracellular region [GO:0005576]	chitin binding [GO:0008061]; chitinase activity [GO:0004568]
EN45_033160	2.532	6.87	4.099e-09	1.14e-06	A0A167XS52_PENCH	Metallothionein expression activator	721	GO:0005634		nucleus [GO:0005634]
EN45_095670	2.53	1.66	0.001263	0.004202	A0A167QZW9_PENCH	Malate dehydrogenase	249
EN45_037580	2.525	1.602	0.0001696	0.0008572	A0A167Y4U6_PENCH	Putative oxidoreductase	436	GO:0016491			oxidoreductase activity [GO:0016491]
EN45_049170	2.507	4.554	6.029e-07	1.947e-05	A0A167RSQ4_PENCH	Putative oxidoreductase YteT	434	GO:0000166			nucleotide binding [GO:0000166]
EN45_001000	2.506	0.05487	0.01853	0.03734	A0A167V4G8_PENCH	Putative succinate-semialdehyde dehydrogenase	494	GO:0016620			oxidoreductase activity, acting on the aldehyde or oxo group of donors, NAD or NADP as acceptor [GO:0016620]
EN45_002310	2.505	1.391	7.662e-05	0.0004651	A0A167XY26_PENCH	Cyanovirin-N-like protein	109
EN45_035160	2.505	1.864	6.71e-05	0.0004213	A0A167V7U9_PENCH	Coiled-coil domain-containing protein 153	247
EN45_003340	2.5	8.58	3.376e-07	1.342e-05	A0A167VAI2_PENCH	Minor allergen Alt a	201	GO:0003955; GO:0010181			FMN binding [GO:0010181]; NAD(P)H dehydrogenase (quinone) activity [GO:0003955]
EN45_108890	2.487	-0.6953	0.001968	0.005988	A0A167PT69_PENCH	Retrovirus-related Pol polyprotein from transposon TNT	888	GO:0003723; GO:0003887; GO:0003964; GO:0005634; GO:0015074; GO:0032196	DNA integration [GO:0015074]; transposition [GO:0032196]	nucleus [GO:0005634]	DNA-directed DNA polymerase activity [GO:0003887]; RNA binding [GO:0003723]; RNA-directed DNA polymerase activity [GO:0003964]
EN45_076210	2.484	0.5253	0.000705	0.002634	A0A167U8K9_PENCH	Putative dioxygenase	370	GO:0051213			dioxygenase activity [GO:0051213]
EN45_112780	2.476	8.903	2.818e-08	3.519e-06	A0A162CNM7_PENCH	Putative mitochondrial carnitine O-acetyltransferase	1480	GO:0000166; GO:0006631; GO:0016746	fatty acid metabolic process [GO:0006631]		acyltransferase activity [GO:0016746]; nucleotide binding [GO:0000166]
EN45_068940	2.468	0.3426	0.01315	0.028	A0A167TIU2_PENCH	ASTRA-associated protein	440
EN45_016780	2.466	2.293	7.375e-06	9.106e-05	A0A167WE20_PENCH	BZIP domain-containing protein	424
EN45_017700	2.461	2.546	4.138e-06	6.297e-05	A0A167WGS6_PENCH	Uncharacterized protein	136
EN45_060540	2.458	-0.6537	0.02408	0.04635	A0A167SS82_PENCH	RxLR effector protein	67
EN45_066780	2.457	0.1154	0.006896	0.0166	A0A167TC13_PENCH	Uncharacterized protein	144
EN45_020310	2.455	5.076	1.24e-06	3.015e-05	A0A167WP50_PENCH	Hydroxymethylglutaryl-CoA synthase (HMG-CoA synthase) (EC 2.3.3.10) (3-hydroxy-3-methylglutaryl coenzyme A synthase)	458	GO:0004421; GO:0006084; GO:0010142	acetyl-CoA metabolic process [GO:0006084]; farnesyl diphosphate biosynthetic process, mevalonate pathway [GO:0010142]		hydroxymethylglutaryl-CoA synthase activity [GO:0004421]
EN45_109430	2.454	3.903	1.624e-05	0.000154	A0A167PUB9_PENCH	EamA domain-containing protein	193	GO:0016021		integral component of membrane [GO:0016021]
EN45_075970	2.451	5.434	0.0007169	0.002672	A0A167U7Q2_PENCH	Leptomycin B resistance protein	1277	GO:0005524; GO:0016021; GO:0140359		integral component of membrane [GO:0016021]	ABC-type transporter activity [GO:0140359]; ATP binding [GO:0005524]
EN45_066640	2.45	-0.3458	0.01896	0.03805	A0A167TBF7_PENCH	Phosphate transporter	595	GO:0005315; GO:0006817; GO:0015293; GO:0016021	phosphate ion transport [GO:0006817]	integral component of membrane [GO:0016021]	inorganic phosphate transmembrane transporter activity [GO:0005315]; symporter activity [GO:0015293]
EN45_018120	2.438	5.281	1.489e-06	3.356e-05	A0A167WHY0_PENCH	TNT domain-containing protein	244	GO:0061810			NAD glycohydrolase activity [GO:0061810]
EN45_078850	2.438	2.134	1.696e-05	0.0001573	A0A167UHW6_PENCH	Helicase required for RNAi-mediated heterochromatin assembly	1159	GO:0004386			helicase activity [GO:0004386]
EN45_028310	2.437	8.107	1.005e-07	6.912e-06	A0A167XCL8_PENCH	Acyl_transf_3 domain-containing protein	481	GO:0016021; GO:0016747		integral component of membrane [GO:0016021]	acyltransferase activity, transferring groups other than amino-acyl groups [GO:0016747]
EN45_079070	2.433	1.023	0.01524	0.03168	A0A167UIP9_PENCH	Carboxylic ester hydrolase (EC 3.1.1.-)	580	GO:0030600; GO:0046872			feruloyl esterase activity [GO:0030600]; metal ion binding [GO:0046872]
EN45_041150	2.43	0.5239	0.01097	0.02415	A0A0C6EFY4_PENCH	Exo-rhamnogalacturonan lyase	927	GO:0016829			lyase activity [GO:0016829]
EN45_038680	2.417	2.262	3.642e-05	0.0002667	A0A167U8S9_PENCH	N-acetyltransferase domain-containing protein	254	GO:0016407			acetyltransferase activity [GO:0016407]
EN45_076270	2.417	3.809	4.668e-07	1.673e-05	A0A167Y885_PENCH	Sterol 3-beta-glucosyltransferase	829	GO:0005975; GO:0008194; GO:0016758; GO:0030259	carbohydrate metabolic process [GO:0005975]; lipid glycosylation [GO:0030259]		hexosyltransferase activity [GO:0016758]; UDP-glycosyltransferase activity [GO:0008194]
EN45_002990	2.409	0.1777	0.007095	0.01702	A0A167V9P5_PENCH	C2H2-type domain-containing protein	386	GO:0005634		nucleus [GO:0005634]
EN45_057370	2.406	1.193	0.005817	0.01448	A0A167SHH9_PENCH	Putative MFS-type transporter	446	GO:0016021; GO:0022857		integral component of membrane [GO:0016021]	transmembrane transporter activity [GO:0022857]
EN45_011400	2.405	8.74	3.423e-09	1.051e-06	A0A167VXJ1_PENCH	Putative bHLH domain-containing protein	290	GO:0046983			protein dimerization activity [GO:0046983]
EN45_096660	2.394	2.395	0.0001423	0.0007516	A0A167R2W1_PENCH	Methyltranfer_dom domain-containing protein	275
EN45_032900	2.393	-0.3608	0.01896	0.03805	A0A167XRC6_PENCH	Argonaute-family protein PcAgo3	1095	GO:0003676			nucleic acid binding [GO:0003676]
EN45_011420	2.385	1.317	0.0002817	0.001272	A0A167VXJ9_PENCH	Serine/threonine-protein kinase SRPK	388	GO:0004672; GO:0005524; GO:0006468	protein phosphorylation [GO:0006468]		ATP binding [GO:0005524]; protein kinase activity [GO:0004672]
EN45_048030	2.382	4.702	2.053e-07	1.051e-05	A0A167RPZ2_PENCH	Similar to	256
EN45_000050	2.377	2.045	1.777e-05	0.0001625	A0A167V1E7_PENCH	Putative formate transporter	312	GO:0016021; GO:0022857		integral component of membrane [GO:0016021]	transmembrane transporter activity [GO:0022857]
EN45_027630	2.377	0.9446	0.0001683	0.0008538	A0A167XAK4_PENCH	Alpha/beta hydrolase	451
EN45_049840	2.374	0.9553	0.00075	0.002769	A0A167RUG7_PENCH	Blasticidin-S deaminase	131	GO:0006139; GO:0008270; GO:0019239	nucleobase-containing compound metabolic process [GO:0006139]		deaminase activity [GO:0019239]; zinc ion binding [GO:0008270]
EN45_085380	2.373	2.518	3.004e-05	0.000235	A0A162CP51_PENCH	Tubulin alpha chain	448	GO:0005200; GO:0005525; GO:0005874; GO:0007017	microtubule-based process [GO:0007017]	microtubule [GO:0005874]	GTP binding [GO:0005525]; structural constituent of cytoskeleton [GO:0005200]
EN45_012930	2.372	-0.6778	0.01251	0.02692	A0A167W1X6_PENCH	Versicolorin B synthase	592	GO:0016614; GO:0050660			flavin adenine dinucleotide binding [GO:0050660]; oxidoreductase activity, acting on CH-OH group of donors [GO:0016614]
EN45_022280	2.365	7.813	1.452e-07	8.56e-06	A0A167WUW9_PENCH	Putative indole-3-pyruvate monooxygenase	622	GO:0004497			monooxygenase activity [GO:0004497]
EN45_005460	2.36	0.6319	0.000553	0.002161	A0A167QPA8_PENCH	UPF0676 protein	358
EN45_091700	2.36	3.654	3.967e-06	6.126e-05	A0A169X3W0_PENCH	CFEM domain-containing protein	409	GO:0016021		integral component of membrane [GO:0016021]
EN45_008820	2.358	-0.3489	0.02179	0.04283	A0A167VQ19_PENCH	DUF5848 domain-containing protein	398
EN45_023740	2.353	1.715	8.062e-05	0.0004853	A0A167WZ10_PENCH	Alpha-L-rhamnosidase rgxB	412	GO:0004650; GO:0005576; GO:0005975; GO:0071555	carbohydrate metabolic process [GO:0005975]; cell wall organization [GO:0071555]	extracellular region [GO:0005576]	polygalacturonase activity [GO:0004650]
EN45_014480	2.352	3.941	1.995e-06	4e-05	A0A167W6K9_PENCH	Secreted protein	158
EN45_060680	2.352	0.4249	0.002004	0.006079	A0A167ST18_PENCH	C2H2-type domain-containing protein	244	GO:0005634		nucleus [GO:0005634]
EN45_050000	2.348	6.159	2.088e-06	4.076e-05	A0A167RUW5_PENCH	ANK_REP_REGION domain-containing protein	703
EN45_037920	2.344	-0.03913	0.024	0.04622	A0A167Y5S7_PENCH	Transmembrane protein	169	GO:0016021		integral component of membrane [GO:0016021]
EN45_110760	2.341	3.06	7.757e-06	9.341e-05	A0A167PX44_PENCH	DAO domain-containing protein	509	GO:0016491			oxidoreductase activity [GO:0016491]
EN45_095620	2.336	1.875	2.154e-05	0.000187	A0A162C285_PENCH	TPR_REGION domain-containing protein	613
EN45_109420	2.335	5.064	3.885e-06	6.036e-05	A0A167PUB5_PENCH	G_PROTEIN_RECEP_F1_2 domain-containing protein	331	GO:0016021		integral component of membrane [GO:0016021]
EN45_021670	2.33	1.776	1.677e-05	0.0001567	A0A167WTB2_PENCH	Sodium-and chloride-dependent GABA transporter	672	GO:0015293; GO:0016021		integral component of membrane [GO:0016021]	symporter activity [GO:0015293]
EN45_034630	2.33	3.494	9.389e-05	0.0005459	A0A167XWI4_PENCH	HET domain-containing protein	717
EN45_032540	2.325	2.638	2.327e-05	0.0001965	A0A167XQA5_PENCH	MutS protein-like protein	942	GO:0005524; GO:0006298; GO:0030983; GO:0140664	mismatch repair [GO:0006298]		ATP binding [GO:0005524]; ATP-dependent DNA damage sensor activity [GO:0140664]; mismatched DNA binding [GO:0030983]
EN45_080130	2.317	5.685	2.197e-07	1.075e-05	A0A167UM30_PENCH	Similar to	309
EN45_085410	2.303	5.206	5.037e-07	1.731e-05	A0A162BZQ1_PENCH	Nitrogen assimilation transcription factor	754	GO:0000981; GO:0003677; GO:0005634; GO:0008270		nucleus [GO:0005634]	DNA binding [GO:0003677]; DNA-binding transcription factor activity, RNA polymerase II-specific [GO:0000981]; zinc ion binding [GO:0008270]
EN45_032120	2.3	1.794	0.0001344	0.0007173	A0A167XNZ4_PENCH	Putative quinate permease	544	GO:0016021; GO:0022857		integral component of membrane [GO:0016021]	transmembrane transporter activity [GO:0022857]
EN45_044990	2.293	3.127	1.204e-05	0.0001238	A0A167YMF7_PENCH	Ldi domain-containing protein	507
EN45_099120	2.286	0.8167	0.02019	0.04012	A0A167R9G5_PENCH	B30.2/SPRY domain-containing protein	1122
EN45_074440	2.281	0.9115	0.0002431	0.001131	A0A167U2I3_PENCH	F-box domain-containing protein	256
EN45_069280	2.28	4.966	4.03e-07	1.527e-05	A0A167TJW6_PENCH	MIT domain-containing protein	396
EN45_112610	2.275	4.215	1.979e-06	3.995e-05	A0A162BZ50_PENCH	TIR domain-containing protein	187
EN45_034500	2.27	8.528	3.986e-08	4.276e-06	A0A167XW65_PENCH	ADP-ribosylation factor	586	GO:0016021		integral component of membrane [GO:0016021]
EN45_016660	2.269	1.189	0.0001942	0.0009477	A0A167WDP8_PENCH	Protein kinase domain-containing protein	461
EN45_082030	2.269	1.453	0.001437	0.004654	A0A167USJ6_PENCH	Putative alpha-ketoglutarate-dependent sulfonate dioxygenase	400	GO:0051213			dioxygenase activity [GO:0051213]
EN45_025680	2.268	3.927	1.171e-05	0.0001213	A0A167X4Q6_PENCH	Spc7 domain-containing protein	544
EN45_056450	2.267	7.238	2.435e-08	3.285e-06	A0A167SEY8_PENCH	Superoxide dismutase [Cu-Zn] (EC 1.15.1.1)	152	GO:0004784; GO:0046872			metal ion binding [GO:0046872]; superoxide dismutase activity [GO:0004784]
EN45_017420	2.262	8.222	7.228e-08	5.903e-06	A0A167WFX8_PENCH	Quinone oxidoreductase	310
EN45_006410	2.26	3.527	1.788e-05	0.0001633	A0A167VGK1_PENCH	CFEM domain-containing protein	134
EN45_080980	2.253	3.936	8.306e-07	2.323e-05	A0A167UPR5_PENCH	G protein-coupled receptor	401	GO:0016021		integral component of membrane [GO:0016021]
EN45_095400	2.253	6.349	1.455e-05	0.0001426	A0A167QZ51_PENCH	DUF2235 domain-containing protein	670
EN45_010210	2.249	-0.7911	0.01873	0.03767	A0A167X337_PENCH	Hly-III-related protein	237	GO:0016021		integral component of membrane [GO:0016021]
EN45_025090	2.249	1.464	0.0002573	0.001183	A0A167VU42_PENCH	Amine oxidase (EC 1.4.3.-)	698	GO:0005507; GO:0008131; GO:0009308; GO:0048038	amine metabolic process [GO:0009308]		copper ion binding [GO:0005507]; primary amine oxidase activity [GO:0008131]; quinone binding [GO:0048038]
EN45_037820	2.248	4.843	0.001217	0.00408	A0A167Y5H6_PENCH	Putative sterigmatocystin biosynthesis P450 monooxygenase STCB	486	GO:0004497; GO:0005506; GO:0008152; GO:0016705; GO:0020037	metabolic process [GO:0008152]		heme binding [GO:0020037]; iron ion binding [GO:0005506]; monooxygenase activity [GO:0004497]; oxidoreductase activity, acting on paired donors, with incorporation or reduction of molecular oxygen [GO:0016705]
EN45_076320	2.242	5.072	7.772e-08	6.123e-06	A0A167U8Y7_PENCH	DUF2252 domain-containing protein	448
EN45_103040	2.231	1.015	0.02569	0.049	A0A167RKF0_PENCH	Riboflavin transporter	462	GO:0016021; GO:0022857		integral component of membrane [GO:0016021]	transmembrane transporter activity [GO:0022857]
EN45_001420	2.229	1.254	0.0005389	0.00212	A0A167V5T7_PENCH	Beta-galactosidase (EC 3.2.1.23)	982	GO:0004565; GO:0005576; GO:0005975	carbohydrate metabolic process [GO:0005975]	extracellular region [GO:0005576]	beta-galactosidase activity [GO:0004565]
EN45_075030	2.224	-0.4016	0.004218	0.01117	A0A167U4G8_PENCH	Lovastatin diketide synthase LovF	2397	GO:0004315; GO:0006633; GO:0008270; GO:0016491; GO:0031177; GO:0044550	fatty acid biosynthetic process [GO:0006633]; secondary metabolite biosynthetic process [GO:0044550]		3-oxoacyl-[acyl-carrier-protein] synthase activity [GO:0004315]; oxidoreductase activity [GO:0016491]; phosphopantetheine binding [GO:0031177]; zinc ion binding [GO:0008270]
EN45_012700	2.221	3.123	2.405e-05	0.0002009	A0A167W171_PENCH	CFEM domain-containing protein	613	GO:0005886; GO:0031225		anchored component of membrane [GO:0031225]; plasma membrane [GO:0005886]
EN45_058260	2.219	3.051	2.314e-06	4.396e-05	A0A167SJT5_PENCH	Ankyrin repeat domain-containing protein	1069
EN45_044240	2.217	0.5314	0.001543	0.004953	A0A167YKB6_PENCH	Nudix hydrolase domain-containing protein	230
EN45_104810	2.215	0.1033	0.002478	0.007259	A0A161Z2B6_PENCH	Sugar transporter	526	GO:0008643; GO:0016021; GO:0022857	carbohydrate transport [GO:0008643]	integral component of membrane [GO:0016021]	transmembrane transporter activity [GO:0022857]
EN45_032260	2.214	-0.4673	0.01806	0.03657	A0A167XPC9_PENCH	Putative arsenite methyltransferase	286	GO:0008168; GO:0032259	methylation [GO:0032259]		methyltransferase activity [GO:0008168]
EN45_087610	2.212	0.4467	0.003718	0.01007	A0A162CPM1_PENCH	RabBD domain-containing protein	213
EN45_055250	2.21	-0.1914	0.01632	0.03348	A0A167SAX3_PENCH	Integral membrane protein	254	GO:0016021		integral component of membrane [GO:0016021]
EN45_097990	2.21	-0.8487	0.01952	0.03899	A0A167R6B9_PENCH	Glucoamylase	326	GO:0005975	carbohydrate metabolic process [GO:0005975]
EN45_033180	2.209	10.87	1.644e-06	3.578e-05	A0A167XS66_PENCH	Chitinase (EC 3.2.1.14)	399	GO:0000272; GO:0004568; GO:0005576; GO:0006032; GO:0008061	chitin catabolic process [GO:0006032]; polysaccharide catabolic process [GO:0000272]	extracellular region [GO:0005576]	chitin binding [GO:0008061]; chitinase activity [GO:0004568]
EN45_076890	2.209	3.985	4.584e-06	6.657e-05	A0A167UB29_PENCH	Uncharacterized protein	115
EN45_053380	2.204	-0.1779	0.02251	0.04398	A0A167S5D2_PENCH	Xylosidase/arabinosidase	356	GO:0004553; GO:0005975	carbohydrate metabolic process [GO:0005975]		hydrolase activity, hydrolyzing O-glycosyl compounds [GO:0004553]
EN45_069390	2.192	4.566	2.363e-07	1.119e-05	A0A167TK78_PENCH	Nudix hydrolase domain-containing protein	322
EN45_056240	2.189	4.112	4.12e-05	0.0002929	A0A167SEF1_PENCH	Uncharacterized protein	90
EN45_031190	2.186	6.936	0.0004037	0.001694	A0A167XLD5_PENCH	4-O-methyl-glucuronoyl methylesterase	391
EN45_017500	2.183	0.2723	0.004227	0.01118	A0A167WG53_PENCH	Serine/threonine-protein kinase SRPK	403	GO:0004672; GO:0005524; GO:0006468	protein phosphorylation [GO:0006468]		ATP binding [GO:0005524]; protein kinase activity [GO:0004672]
EN45_021020	2.182	3.922	1.064e-05	0.0001154	A0A167WR69_PENCH	Amine oxidase (EC 1.4.3.-)	534	GO:0016491			oxidoreductase activity [GO:0016491]
EN45_106880	2.181	0.8233	0.0007306	0.002713	A0A167PP66_PENCH	Pisatin demethylase	481	GO:0004497; GO:0005506; GO:0008168; GO:0016705; GO:0020037; GO:0032259	methylation [GO:0032259]		heme binding [GO:0020037]; iron ion binding [GO:0005506]; methyltransferase activity [GO:0008168]; monooxygenase activity [GO:0004497]; oxidoreductase activity, acting on paired donors, with incorporation or reduction of molecular oxygen [GO:0016705]
EN45_072690	2.172	9.1	9.284e-07	2.506e-05	A0A167TWJ0_PENCH	Quinone oxidoreductase	305
EN45_103060	2.168	-0.2649	0.02612	0.0497	A0A167RKG5_PENCH	Unsaturated rhamnogalacturonyl hydrolase YteR	382	GO:0005975; GO:0016787	carbohydrate metabolic process [GO:0005975]		hydrolase activity [GO:0016787]
EN45_066200	2.167	10.71	5.328e-08	4.89e-06	A0A167TA88_PENCH	HET-C domain protein HetC	789
EN45_056250	2.162	5.525	2.016e-05	0.0001788	A0A167SEF6_PENCH	Zinc finger protein	725	GO:0000981; GO:0003677; GO:0005634; GO:0008270		nucleus [GO:0005634]	DNA binding [GO:0003677]; DNA-binding transcription factor activity, RNA polymerase II-specific [GO:0000981]; zinc ion binding [GO:0008270]
EN45_075570	2.159	1.722	0.008496	0.01964	A0A167U6B1_PENCH	ANK_REP_REGION domain-containing protein	764
EN45_056820	2.154	0.09822	0.02261	0.04414	A0A167SFY0_PENCH	Virion structural protein	1166
EN45_099360	2.153	1.449	0.002908	0.008244	A0A167RA63_PENCH	CAP10 domain-containing protein	696
EN45_028750	2.143	6.773	1.229e-08	2.14e-06	A0A167XDX7_PENCH	Methyltransferase	296	GO:0016491			oxidoreductase activity [GO:0016491]
EN45_042910	2.137	0.4107	0.002087	0.006284	A0A167U6X5_PENCH	Benzoate 4-monooxygenase	533	GO:0004497; GO:0005506; GO:0016021; GO:0016705; GO:0020037		integral component of membrane [GO:0016021]	heme binding [GO:0020037]; iron ion binding [GO:0005506]; monooxygenase activity [GO:0004497]; oxidoreductase activity, acting on paired donors, with incorporation or reduction of molecular oxygen [GO:0016705]
EN45_072170	2.137	1.204	0.0006142	0.00236	A0A167TUR1_PENCH	Uncharacterized protein	284
EN45_075730	2.137	2.146	5.743e-05	0.000379	A0A167YGT4_PENCH	GPI anchored protein	202
EN45_083800	2.136	2.136	4.939e-05	0.0003355	A0A161ZCW3_PENCH	Growth-regulating factor	201
EN45_065980	2.134	8.47	2.511e-07	1.164e-05	A0A167T9I8_PENCH	Urease accessory protein D	401	GO:0006807; GO:0016151	nitrogen compound metabolic process [GO:0006807]		nickel cation binding [GO:0016151]
EN45_075670	2.131	2.956	1.489e-05	0.0001452	A0A167U6N3_PENCH	NmrA domain-containing protein	305
EN45_084210	2.129	3.53	3.538e-06	5.747e-05	A0A167UY08_PENCH	Gluconokinase (EC 2.7.1.12) (Gluconate kinase)	1234	GO:0005524; GO:0009058; GO:0016310; GO:0031177; GO:0046177; GO:0046316	biosynthetic process [GO:0009058]; D-gluconate catabolic process [GO:0046177]; phosphorylation [GO:0016310]		ATP binding [GO:0005524]; gluconokinase activity [GO:0046316]; phosphopantetheine binding [GO:0031177]
EN45_092260	2.128	0.3217	0.009771	0.022	A0A167QQT7_PENCH	Putative peptide transporter	549	GO:0006857; GO:0016021; GO:0022857	oligopeptide transport [GO:0006857]	integral component of membrane [GO:0016021]	transmembrane transporter activity [GO:0022857]
EN45_087550	2.121	1.971	0.001179	0.003977	A0A167PWR7_PENCH	Protein kinase domain-containing protein	524
EN45_110590	2.121	2.474	0.000121	0.000658	A0A167QD01_PENCH	APH domain-containing protein	129	GO:0004672; GO:0006468	protein phosphorylation [GO:0006468]		protein kinase activity [GO:0004672]
EN45_023160	2.114	3.372	1.44e-06	3.301e-05	A0A161ZIR2_PENCH	Uncharacterized protein	157	GO:0006479	protein methylation [GO:0006479]
EN45_003100	2.109	2.65	0.000338	0.001471	A0A161ZE40_PENCH	RRM domain-containing protein	396	GO:0003723			RNA binding [GO:0003723]
EN45_000940	2.108	2.562	1.753e-05	0.0001614	A0A161ZDI8_PENCH	Zn(2)-C6 fungal-type domain-containing protein	469	GO:0000981; GO:0003677; GO:0005634; GO:0008270		nucleus [GO:0005634]	DNA binding [GO:0003677]; DNA-binding transcription factor activity, RNA polymerase II-specific [GO:0000981]; zinc ion binding [GO:0008270]
EN45_021520	2.1	3.355	1.799e-05	0.0001637	A0A167WSW0_PENCH	Putative receptor-like protein kinase	242	GO:0004672; GO:0005524; GO:0006468	protein phosphorylation [GO:0006468]		ATP binding [GO:0005524]; protein kinase activity [GO:0004672]
EN45_003130	2.097	9.404	2.831e-06	5.044e-05	A0A167VA02_PENCH	Potassium channel toxin	55
EN45_012450	2.094	1.447	0.001795	0.005579	A0A161ZGG0_PENCH	CAP10 domain-containing protein	701
EN45_003580	2.093	6.122	4.777e-08	4.722e-06	A0A167VB72_PENCH	Putative transporter	509	GO:0016021; GO:0022857		integral component of membrane [GO:0016021]	transmembrane transporter activity [GO:0022857]
EN45_050230	2.091	2.051	0.000205	0.0009901	A0A167RVQ4_PENCH	CAZy families GH13 protein	90
EN45_096250	2.089	0.4911	0.003743	0.01012	A0A167R1J7_PENCH	Similar to	331
EN45_109530	2.088	2.149	0.0001206	0.0006561	A0A167PUG5_PENCH	CENP-V/GFA domain-containing protein	181	GO:0016846; GO:0046872			carbon-sulfur lyase activity [GO:0016846]; metal ion binding [GO:0046872]
EN45_098200	2.087	2.171	2.973e-05	0.0002337	A0A162CRW1_PENCH	2,4-dichlorophenol 6-monooxygenase	579	GO:0004497; GO:0044550; GO:0071949	secondary metabolite biosynthetic process [GO:0044550]		FAD binding [GO:0071949]; monooxygenase activity [GO:0004497]
EN45_072190	2.086	6.158	1.065e-06	2.715e-05	A0A167TUS8_PENCH	Glutathione hydrolase (EC 2.3.2.2) (EC 3.4.19.13) (Gamma-glutamyltransferase)	578	GO:0006751; GO:0036374; GO:0102953; GO:0103068	glutathione catabolic process [GO:0006751]		glutathione hydrolase activity [GO:0036374]; hypoglycin A gamma-glutamyl transpeptidase activity [GO:0102953]; leukotriene C4 gamma-glutamyl transferase activity [GO:0103068]
EN45_098500	2.074	4.057	1.055e-05	0.0001146	A0A162CRY2_PENCH	Nitrilase	366	GO:0000257; GO:0006807; GO:0016829	nitrogen compound metabolic process [GO:0006807]		lyase activity [GO:0016829]; nitrilase activity [GO:0000257]
EN45_068540	2.073	4.185	0.0006201	0.002374	A0A167THN5_PENCH	Activator of stress genes	580	GO:0003677; GO:0006351; GO:0008270	DNA-templated transcription [GO:0006351]		DNA binding [GO:0003677]; zinc ion binding [GO:0008270]
EN45_087420	2.068	9.292	1.402e-05	0.0001392	A0A167QSJ2_PENCH	SP-RING-type domain-containing protein	628	GO:0000724; GO:0005634; GO:0008270; GO:0019789; GO:0030915	double-strand break repair via homologous recombination [GO:0000724]	nucleus [GO:0005634]; Smc5-Smc6 complex [GO:0030915]	SUMO transferase activity [GO:0019789]; zinc ion binding [GO:0008270]
EN45_093110	2.068	5.345	2.895e-07	1.233e-05	A0A167QCM8_PENCH	Beta-flanking protein	270
EN45_080000	2.061	0.7741	0.002682	0.007713	A0A167QUY4_PENCH	Ankyrin-1	2157
EN45_093810	2.061	3.398	4.954e-06	6.979e-05	A0A167ULU0_PENCH	Ornithine decarboxylase	429	GO:0006596; GO:0016831	polyamine biosynthetic process [GO:0006596]		carboxy-lyase activity [GO:0016831]
EN45_084390	2.059	4.551	7.604e-07	2.24e-05	A0A167UYM5_PENCH	Putative ankyrin repeat protein	788
EN45_087540	2.058	4.577	7.067e-07	2.133e-05	A0A162C061_PENCH	Vegetative incompatibility protein HET-E-1	1507
EN45_084220	2.056	0.7664	0.00122	0.004086	A0A167UY15_PENCH	D-xylose reductase (NAD(P)H) (EC 1.1.1.307)	323	GO:0016491			oxidoreductase activity [GO:0016491]
EN45_031100	2.054	3.635	1.304e-06	3.104e-05	A0A167XL43_PENCH	Zn(2)-C6 fungal-type domain-containing protein	729	GO:0000981; GO:0003677; GO:0005634; GO:0008270		nucleus [GO:0005634]	DNA binding [GO:0003677]; DNA-binding transcription factor activity, RNA polymerase II-specific [GO:0000981]; zinc ion binding [GO:0008270]
EN45_113000	2.052	5.008	2.596e-08	3.349e-06	A0A167Q1R5_PENCH	Putative quercetin 2,3-dioxygenase	287	GO:0051213			dioxygenase activity [GO:0051213]
EN45_069770	2.048	3.737	1.667e-06	3.62e-05	A0A167TLH1_PENCH	F-box domain-containing protein	314
EN45_011940	2.045	4.048	1.492e-06	3.356e-05	A0A161ZGC0_PENCH	Protein kinase domain-containing protein	865
EN45_087660	2.044	5.417	2.946e-08	3.582e-06	A0A167QDD7_PENCH	Quinate permease	555	GO:0016021; GO:0022857		integral component of membrane [GO:0016021]	transmembrane transporter activity [GO:0022857]
EN45_065000	2.036	2.059	0.0001693	0.0008564	A0A167T6K3_PENCH	Peptidase M20 domain-containing protein 2	411	GO:0005576; GO:0006508; GO:0016805	proteolysis [GO:0006508]	extracellular region [GO:0005576]	dipeptidase activity [GO:0016805]
EN45_072680	2.036	3.707	0.0003472	0.001503	A0A167TWH6_PENCH	Uncharacterized protein	184
EN45_069850	2.033	0.2229	0.001305	0.004313	A0A167TLV6_PENCH	Putative agmatinase	375	GO:0016813; GO:0046872			hydrolase activity, acting on carbon-nitrogen (but not peptide) bonds, in linear amidines [GO:0016813]; metal ion binding [GO:0046872]
EN45_076360	2.032	5.176	1.653e-07	9.039e-06	A0A167U922_PENCH	Putative NADPH dehydrogenase	443	GO:0003959; GO:0010181; GO:0050661			FMN binding [GO:0010181]; NADP binding [GO:0050661]; NADPH dehydrogenase activity [GO:0003959]
EN45_114870	2.028	2.086	0.0008377	0.003023	A0A162BZL5_PENCH	Cholinesterase	151
EN45_045500	2.022	1.086	0.0005336	0.002107	A0A167YP30_PENCH	Beta-galactosidase (EC 3.2.1.23)	1013	GO:0004565; GO:0005576; GO:0005975	carbohydrate metabolic process [GO:0005975]	extracellular region [GO:0005576]	beta-galactosidase activity [GO:0004565]
EN45_064780	2.015	-0.2572	0.004125	0.01098	A0A167T5W4_PENCH	Extracellular exo-inulinase inuE	431	GO:0004553; GO:0005975	carbohydrate metabolic process [GO:0005975]		hydrolase activity, hydrolyzing O-glycosyl compounds [GO:0004553]
EN45_035720	2.01	0.5227	0.00263	0.007614	A0A167XZK6_PENCH	Putative transporter	510	GO:0016021; GO:0022857		integral component of membrane [GO:0016021]	transmembrane transporter activity [GO:0022857]
EN45_004070	2.008	2.963	3.433e-05	0.0002573	A0A167VCM0_PENCH	Putative permease	561	GO:0016021; GO:0022857		integral component of membrane [GO:0016021]	transmembrane transporter activity [GO:0022857]
EN45_025270	2.006	2.793	7.873e-05	0.0004751	A0A167X3J0_PENCH	Movement protein	344
EN45_021930	2.005	7.963	4.691e-07	1.673e-05	A0A161ZIG7_PENCH	Phosphatidate phosphatase	413	GO:0008195			phosphatidate phosphatase activity [GO:0008195]
EN45_025550	2.004	0.7657	0.01008	0.02256	A0A167TKB2_PENCH	Thioredoxin	106	GO:0015035			protein-disulfide reductase activity [GO:0015035]
EN45_069420	2.004	8.919	6.35e-09	1.521e-06	A0A167X4D7_PENCH	Nudix hydrolase domain-containing protein	430
EN45_106640	2.004	1.427	0.01004	0.02249	A0A167PNV2_PENCH	Carnosine N-methyltransferase	425	GO:0008757; GO:0032259	methylation [GO:0032259]		S-adenosylmethionine-dependent methyltransferase activity [GO:0008757]
EN45_032530	2.003	12.29	6.213e-07	1.968e-05	A0A167XQ96_PENCH	Heat shock protein	789	GO:0005524; GO:0016887			ATP binding [GO:0005524]; ATP hydrolysis activity [GO:0016887]
EN45_023170	1.999	3.455	6.537e-06	8.456e-05	A0A167TAZ6_PENCH	Putative FAD-linked oxidoreductase	564	GO:0016491; GO:0071949			FAD binding [GO:0071949]; oxidoreductase activity [GO:0016491]
EN45_092430	1.999	3.238	6.856e-06	8.671e-05	A0A161XUR8_PENCH	Putative quinate permease	424	GO:0016021; GO:0022857		integral component of membrane [GO:0016021]	transmembrane transporter activity [GO:0022857]
EN45_019300	1.998	2.45	2.955e-05	0.0002332	Q2YFD7_PENCH	ATP synthase subunit 9, mitochondrial (Lipid-binding protein)	150	GO:0008289; GO:0015078; GO:0015986; GO:0016021; GO:0045263	proton motive force-driven ATP synthesis [GO:0015986]	integral component of membrane [GO:0016021]; proton-transporting ATP synthase complex, coupling factor F(o) [GO:0045263]	lipid binding [GO:0008289]; proton transmembrane transporter activity [GO:0015078]
EN45_057260	1.997	4.659	2.449e-06	4.561e-05	A0A167WP30_PENCH	L-ornithine N(5)-monooxygenase (EC 1.14.13.196) (L-ornithine N(5)-oxygenase)	574	GO:0044249; GO:1901566	cellular biosynthetic process [GO:0044249]; organonitrogen compound biosynthetic process [GO:1901566]
EN45_110210	1.996	1.172	0.005162	0.01311	A0A167QLG9_PENCH	DUF2183 domain-containing protein	487	GO:0008195			phosphatidate phosphatase activity [GO:0008195]
EN45_068880	1.995	5.616	1.62e-07	9.039e-06	A0A167QKH4_PENCH	FHA domain-containing protein	516
EN45_105450	1.99	3.664	1.59e-06	3.503e-05	A0A167YCL7_PENCH	P30 adhesin	226
EN45_004010	1.989	0.3579	0.00496	0.01271	G9LQX9_PENCH	Pyruvate decarboxylase (EC 4.1.1.1)	570	GO:0000287; GO:0004737; GO:0030976			magnesium ion binding [GO:0000287]; pyruvate decarboxylase activity [GO:0004737]; thiamine pyrophosphate binding [GO:0030976]
EN45_095650	1.987	6.153	5.942e-08	5.086e-06	A0A167PRA8_PENCH	3-hydroxybenzoate 4-monooxygenase	159	GO:0004497; GO:0044550; GO:0071949	secondary metabolite biosynthetic process [GO:0044550]		FAD binding [GO:0071949]; monooxygenase activity [GO:0004497]
EN45_000950	1.982	4.042	9.159e-05	0.0005339	A0A167SN97_PENCH	AB hydrolase superfamily protein	291	GO:0016787			hydrolase activity [GO:0016787]
EN45_109600	1.982	2.25	0.0001483	0.0007755	A0A167UGT7_PENCH	CipC protein	109
EN45_114750	1.98	10.33	5.935e-06	7.886e-05	A0A169X3K8_PENCH	Dihydromonacolin L monooxygenase LovA	508	GO:0004497; GO:0005506; GO:0008152; GO:0016705; GO:0020037	metabolic process [GO:0008152]		heme binding [GO:0020037]; iron ion binding [GO:0005506]; monooxygenase activity [GO:0004497]; oxidoreductase activity, acting on paired donors, with incorporation or reduction of molecular oxygen [GO:0016705]
EN45_059100	1.978	7.351	8.991e-09	1.74e-06	A0A167VJ19_PENCH	Uricase (EC 1.7.3.3) (Urate oxidase)	302	GO:0004846; GO:0005777; GO:0006144; GO:0019628	purine nucleobase metabolic process [GO:0006144]; urate catabolic process [GO:0019628]	peroxisome [GO:0005777]	urate oxidase activity [GO:0004846]
EN45_044880	1.974	3.396	3.429e-05	0.0002573	A0A167WMH5_PENCH	Suppressor protein	314	GO:0003723			RNA binding [GO:0003723]
EN45_101610	1.969	3.554	9.843e-06	0.0001092	A0A167Y104_PENCH	Respiratory supercomplex factor	96	GO:0016021		integral component of membrane [GO:0016021]
EN45_100520	1.968	7.403	5.205e-08	4.826e-06	A0A167TUV0_PENCH	G_PROTEIN_RECEP_F2_4 domain-containing protein	425	GO:0004888; GO:0007166; GO:0016021	cell surface receptor signaling pathway [GO:0007166]	integral component of membrane [GO:0016021]	transmembrane signaling receptor activity [GO:0004888]
EN45_030720	1.968	1.603	0.0006388	0.00243	A0A167QW17_PENCH	Transmembrane protein	303	GO:0016021		integral component of membrane [GO:0016021]
EN45_000340	1.967	3.615	6.523e-05	0.0004132	A0A167Y362_PENCH	Pyrid_ox_like domain-containing protein	212
EN45_103400	1.966	9.603	4.47e-06	6.566e-05	A0A167W2J5_PENCH	Similar to	642	GO:0016021		integral component of membrane [GO:0016021]
EN45_015610	1.964	4.465	8.508e-07	2.323e-05	A0A167SCX8_PENCH	Transcriptional activator protein	683	GO:0000981; GO:0003677; GO:0005634; GO:0008270		nucleus [GO:0005634]	DNA binding [GO:0003677]; DNA-binding transcription factor activity, RNA polymerase II-specific [GO:0000981]; zinc ion binding [GO:0008270]
EN45_112260	1.962	4.133	2.199e-07	1.075e-05	A0A167Y3Z3_PENCH	Putative MFS-type transporter	605	GO:0016021; GO:0022857		integral component of membrane [GO:0016021]	transmembrane transporter activity [GO:0022857]
EN45_037900	1.958	2.336	1.773e-05	0.0001625	A0A167RM56_PENCH	Glutamate decarboxylase (EC 4.1.1.15)	497	GO:0004351; GO:0006536; GO:0030170	glutamate metabolic process [GO:0006536]		glutamate decarboxylase activity [GO:0004351]; pyridoxal phosphate binding [GO:0030170]
EN45_111850	1.956	6.192	1.296e-07	8.05e-06	A0A167UJB0_PENCH	Spo12 family-domain-containing protein	107
EN45_058360	1.956	3.046	3.217e-06	5.431e-05	A0A167XTC2_PENCH	LEA domain-containing protein	192
EN45_084380	1.953	5.446	9.54e-08	6.794e-06	A0A167R771_PENCH	Alkali-sensitive linkage protein	265	GO:0005576		extracellular region [GO:0005576]
EN45_107450	1.953	0.2722	0.002497	0.007302	A0A167XH39_PENCH	Xanthine phosphoribosyltransferase	235	GO:0016021; GO:0016757		integral component of membrane [GO:0016021]	glycosyltransferase activity [GO:0016757]
EN45_069600	1.942	2.654	0.0001431	0.0007542	A0A167SDE4_PENCH	Glycerol-3-phosphate dehydrogenase [NAD(+)] (EC 1.1.1.8)	409	GO:0004367; GO:0005975; GO:0009331; GO:0042803; GO:0046168; GO:0051287	carbohydrate metabolic process [GO:0005975]; glycerol-3-phosphate catabolic process [GO:0046168]	glycerol-3-phosphate dehydrogenase complex [GO:0009331]	glycerol-3-phosphate dehydrogenase [NAD+] activity [GO:0004367]; NAD binding [GO:0051287]; protein homodimerization activity [GO:0042803]
EN45_035760	1.94	1.153	0.0004023	0.00169	A0A167VC79_PENCH	Integral membrane protein	388	GO:0016021		integral component of membrane [GO:0016021]
EN45_114110	1.938	1.674	0.0001519	0.0007887	A0A167UF59_PENCH	Uncharacterized protein	74
EN45_071530	1.934	0.6979	0.01836	0.03706	A0A167RUB4_PENCH	N amino acid transport system protein	426	GO:0016021		integral component of membrane [GO:0016021]
EN45_066560	1.933	4.709	1.241e-07	7.889e-06	A0A167TDJ4_PENCH	Ribosome assembly factor mrt4	246	GO:0000027; GO:0005730; GO:0005737	ribosomal large subunit assembly [GO:0000027]	cytoplasm [GO:0005737]; nucleolus [GO:0005730]
EN45_004270	1.929	1.605	0.0002473	0.001148	A0A167WKR2_PENCH	Integral membrane protein	371	GO:0016021		integral component of membrane [GO:0016021]
EN45_084920	1.925	-0.01818	0.00567	0.01418	A0A167RTR2_PENCH	Integral membrane protein	364	GO:0016021		integral component of membrane [GO:0016021]
EN45_079720	1.924	5.891	0.0002505	0.001157	A0A167TYE4_PENCH	INVERT_DEFENSINS domain-containing protein	167
EN45_059480	1.92	1.128	0.003445	0.00946	A0A167XMT6_PENCH	Pescadillo homolog (Nucleolar protein 7 homolog)	673	GO:0000463; GO:0000466; GO:0005654; GO:0005730; GO:0030687; GO:0043021	maturation of 5.8S rRNA from tricistronic rRNA transcript (SSU-rRNA, 5.8S rRNA, LSU-rRNA) [GO:0000466]; maturation of LSU-rRNA from tricistronic rRNA transcript (SSU-rRNA, 5.8S rRNA, LSU-rRNA) [GO:0000463]	nucleolus [GO:0005730]; nucleoplasm [GO:0005654]; preribosome, large subunit precursor [GO:0030687]	ribonucleoprotein complex binding [GO:0043021]
EN45_020520	1.914	5.717	1.303e-08	2.14e-06	A0A167PXP7_PENCH	Putative tubulin-tyrosine ligase	314	GO:0008252; GO:0016874; GO:0046872			ligase activity [GO:0016874]; metal ion binding [GO:0046872]; nucleotidase activity [GO:0008252]
EN45_028740	1.913	3.251	0.0001475	0.0007729	Q8NKC4_PENCH	Aromatic amino acid and leucine permease (Putative proline-specific permease)	559	GO:0016021; GO:0055085	transmembrane transport [GO:0055085]	integral component of membrane [GO:0016021]
EN45_030220	1.91	4.811	6.789e-06	8.621e-05	A0A162CQT3_PENCH	Uncharacterized protein	309
EN45_057280	1.91	1.214	0.0002596	0.001191	A0A167TBM8_PENCH	African swine fever virus j13L	83	GO:0016021		integral component of membrane [GO:0016021]
EN45_069650	1.903	3.426	3.573e-05	0.0002635	A0A167T7U8_PENCH	Putative hemerythrin-like protein	192	GO:0055072	iron ion homeostasis [GO:0055072]
EN45_035770	1.902	1.961	0.0002404	0.001121	A0A167WC64_PENCH	1,3-beta-glucanosyltransferase (EC 2.4.1.-)	538	GO:0005576; GO:0005886; GO:0031225; GO:0042123; GO:0071840; GO:0071852	cellular component organization or biogenesis [GO:0071840]; fungal-type cell wall organization or biogenesis [GO:0071852]	anchored component of membrane [GO:0031225]; extracellular region [GO:0005576]; plasma membrane [GO:0005886]	glucanosyltransferase activity [GO:0042123]
EN45_030370	1.901	9.306	1.353e-06	3.168e-05	A0A167UKQ3_PENCH	Carboxylesterase NlhH	341	GO:0016787			hydrolase activity [GO:0016787]
EN45_048410	1.901	0.6577	0.0009802	0.003441	A0A167TN71_PENCH	TPR domain protein	565
EN45_084990	1.9	1.538	0.0002065	0.0009945	A0A167V2N2_PENCH	Docosahexaenoic acid omega-hydroxylase	552	GO:0004497; GO:0005506; GO:0008152; GO:0016705; GO:0020037	metabolic process [GO:0008152]		heme binding [GO:0020037]; iron ion binding [GO:0005506]; monooxygenase activity [GO:0004497]; oxidoreductase activity, acting on paired donors, with incorporation or reduction of molecular oxygen [GO:0016705]
EN45_077610	1.894	9.98	3.305e-07	1.325e-05	A0A167SHL1_PENCH	Protein kinase domain-containing protein	268	GO:0004672; GO:0005524; GO:0006468	protein phosphorylation [GO:0006468]		ATP binding [GO:0005524]; protein kinase activity [GO:0004672]
EN45_034620	1.893	5.983	1.461e-06	3.327e-05	A0A167SDU1_PENCH	Putative alpha,alpha-trehalose-phosphate synthase 106 kDa subunit	845	GO:0004805; GO:0005992	trehalose biosynthetic process [GO:0005992]		trehalose-phosphatase activity [GO:0004805]
EN45_031110	1.893	2.649	0.0004695	0.001904	A0A167QEN7_PENCH	Methylenetetrahydrofolate dehydrogenase	334	GO:0004488; GO:0006730	one-carbon metabolic process [GO:0006730]		methylenetetrahydrofolate dehydrogenase (NADP+) activity [GO:0004488]
EN45_052310	1.891	5.402	1.261e-07	7.908e-06	A0A162CMM1_PENCH	Phenol 2-monooxygenase	309	GO:0004497; GO:0044550; GO:0071949	secondary metabolite biosynthetic process [GO:0044550]		FAD binding [GO:0071949]; monooxygenase activity [GO:0004497]
EN45_094460	1.891	3.283	2.097e-05	0.0001836	A0A167X290_PENCH	Mating-type M-specific polypeptide Mc	259	GO:0003677; GO:0005634		nucleus [GO:0005634]	DNA binding [GO:0003677]
EN45_082130	1.891	0.7429	0.01163	0.02534	A0A167Y707_PENCH	ATPase	784
EN45_108990	1.89	1.223	0.001039	0.003605	A0A167TXI0_PENCH	Pyridoxal 5'-phosphate synthase (EC 1.4.3.5)	351	GO:0004733; GO:0008615; GO:0010181	pyridoxine biosynthetic process [GO:0008615]		FMN binding [GO:0010181]; pyridoxamine-phosphate oxidase activity [GO:0004733]
EN45_100190	1.889	5.273	1.891e-06	3.896e-05	A0A167Q2Y1_PENCH	Putative feruloyl esterase A	284	GO:0006629	lipid metabolic process [GO:0006629]
EN45_088410	1.889	2.195	4.171e-05	0.0002958	A0A167UC50_PENCH	Transporter	427	GO:0016021; GO:0055085	transmembrane transport [GO:0055085]	integral component of membrane [GO:0016021]
EN45_008650	1.886	5.82	4.175e-06	6.343e-05	A0A167Y680_PENCH	Extracellular esterase EstB	275	GO:0016042; GO:0016787	lipid catabolic process [GO:0016042]		hydrolase activity [GO:0016787]
EN45_081980	1.882	1.758	0.00189	0.005803	A0A167VSQ4_PENCH	ABC1 family protein MCP2-like protein	622
EN45_031050	1.88	4.569	1.585e-06	3.502e-05	A0A167WXY3_PENCH	Allergen Asp f	348	GO:0005576; GO:0019863		extracellular region [GO:0005576]	IgE binding [GO:0019863]
EN45_008300	1.874	5.359	8.205e-08	6.26e-06	A0A167Q9U9_PENCH	Prolyl 3,4-dihydroxylase	656	GO:0005506; GO:0031418; GO:0031543			iron ion binding [GO:0005506]; L-ascorbic acid binding [GO:0031418]; peptidyl-proline dioxygenase activity [GO:0031543]
EN45_110690	1.873	8.553	1.391e-07	8.369e-06	A0A167X955_PENCH	Non-structural maintenance of chromosome element	353
EN45_019940	1.866	1.949	0.001626	0.005156	A0A167XYJ3_PENCH	Putative transporter	574	GO:0016021; GO:0022857		integral component of membrane [GO:0016021]	transmembrane transporter activity [GO:0022857]
EN45_019550	1.864	9.094	2.552e-08	3.341e-06	A0A167QAE3_PENCH	GPI anchored protein	202
EN45_077490	1.864	4.206	6.152e-05	0.0003957	A0A167Y081_PENCH	Uncharacterized protein	102
EN45_091990	1.862	4.852	1.729e-07	9.271e-06	A0A167VT73_PENCH	Mediator of RNA polymerase II transcription subunit 6	211
EN45_091120	1.862	4.685	3.83e-06	5.983e-05	A0A167SUD0_PENCH	Protein-lysine N-methyltransferase EFM6 (EC 2.1.1.-) (Elongation factor methyltransferase 6)	249	GO:0005737; GO:0016279; GO:0018022	peptidyl-lysine methylation [GO:0018022]	cytoplasm [GO:0005737]	protein-lysine N-methyltransferase activity [GO:0016279]
EN45_024350	1.861	1.793	0.0001676	0.0008512	A0A167TAY7_PENCH	Integral membrane protein	312	GO:0016021		integral component of membrane [GO:0016021]
EN45_036430	1.859	9.732	4.925e-08	4.722e-06	A0A167QDP8_PENCH	Zinc-regulated transporter	351	GO:0005385; GO:0016021		integral component of membrane [GO:0016021]	zinc ion transmembrane transporter activity [GO:0005385]
EN45_079200	1.858	6.525	3.655e-08	4.08e-06	A0A162CQB2_PENCH	Homeobox domain-containing protein	528
EN45_104860	1.853	2.259	0.0003771	0.001606	A0A167SRG7_PENCH	CENP-C_C domain-containing protein	760
EN45_022480	1.85	7.031	1.61e-06	3.53e-05	A0A167Y718_PENCH	Zn(2)-C6 fungal-type domain-containing protein	671	GO:0000981; GO:0003677; GO:0005634; GO:0008270		nucleus [GO:0005634]	DNA binding [GO:0003677]; DNA-binding transcription factor activity, RNA polymerase II-specific [GO:0000981]; zinc ion binding [GO:0008270]
EN45_101330	1.85	4.414	4.602e-06	6.673e-05	A0A167UTZ6_PENCH	Methylsterol monooxygenase	554	GO:0004497; GO:0005506; GO:0016021; GO:0016126; GO:0044255	cellular lipid metabolic process [GO:0044255]; sterol biosynthetic process [GO:0016126]	integral component of membrane [GO:0016021]	iron ion binding [GO:0005506]; monooxygenase activity [GO:0004497]
EN45_012370	1.85	4.898	2.299e-05	0.0001946	A0A167WFJ5_PENCH	Integral membrane protein	495	GO:0016021		integral component of membrane [GO:0016021]
EN45_100510	1.848	7.487	2.004e-08	2.877e-06	A0A167VGW9_PENCH	Secreted protein	254	GO:0016021		integral component of membrane [GO:0016021]
EN45_105250	1.845	3.485	3.677e-06	5.867e-05	A0A167SCU0_PENCH	Cell wall protein	804
EN45_070020	1.844	3.139	0.000202	0.0009794	A0A167VYK5_PENCH	Trichodiene oxygenase	503	GO:0004497; GO:0005506; GO:0016705; GO:0020037			heme binding [GO:0020037]; iron ion binding [GO:0005506]; monooxygenase activity [GO:0004497]; oxidoreductase activity, acting on paired donors, with incorporation or reduction of molecular oxygen [GO:0016705]
EN45_107370	1.838	2.076	0.0002837	0.001279	A0A167T8T4_PENCH	N amino acid transport system protein	606	GO:0016021		integral component of membrane [GO:0016021]
EN45_055030	1.837	6.053	2.461e-07	1.155e-05	A0A167VYM4_PENCH	Alpha-1,3-glucan synthase (EC 2.4.1.183)	2378	GO:0005576; GO:0005975; GO:0016021; GO:0047657	carbohydrate metabolic process [GO:0005975]	extracellular region [GO:0005576]; integral component of membrane [GO:0016021]	alpha-1,3-glucan synthase activity [GO:0047657]
EN45_079660	1.837	4.689	3.751e-06	5.931e-05	A0A167UW92_PENCH	Protein pyrABCN	2246	GO:0004070; GO:0004088; GO:0005524; GO:0006207; GO:0006541; GO:0016597; GO:0044205; GO:0046872	'de novo' pyrimidine nucleobase biosynthetic process [GO:0006207]; 'de novo' UMP biosynthetic process [GO:0044205]; glutamine metabolic process [GO:0006541]		amino acid binding [GO:0016597]; aspartate carbamoyltransferase activity [GO:0004070]; ATP binding [GO:0005524]; carbamoyl-phosphate synthase (glutamine-hydrolyzing) activity [GO:0004088]; metal ion binding [GO:0046872]
EN45_053240	1.836	2.449	0.0002288	0.001078	A0A167VGZ1_PENCH	Putative membrane protein	449	GO:0015267; GO:0016021		integral component of membrane [GO:0016021]	channel activity [GO:0015267]
EN45_053180	1.834	3.519	1.742e-05	0.0001605	A0A167UG69_PENCH	Lytic polysaccharide monooxygenase	400
EN45_009830	1.834	2.449	0.0004519	0.001851	A0A167W346_PENCH	Endo-1,6-beta-D-glucanase	497	GO:0004348; GO:0005576; GO:0006665	sphingolipid metabolic process [GO:0006665]	extracellular region [GO:0005576]	glucosylceramidase activity [GO:0004348]
EN45_073210	1.828	0.896	0.004465	0.01171	A0A167QQK7_PENCH	Antifungal protein (Antifungal protein PAFB)	92
EN45_036440	1.827	9.944	5.808e-06	7.797e-05	A0A167T7H2_PENCH	D-xylose reductase (NAD(P)H) (EC 1.1.1.307)	315	GO:0016491			oxidoreductase activity [GO:0016491]
EN45_101340	1.824	4.488	1.403e-05	0.0001392	A0A167Y4K8_PENCH	AAA domain-containing protein	2033
EN45_058960	1.82	11.1	1.519e-05	0.0001468	A0A167YSE6_PENCH	RNA-binding domain-containing protein	540	GO:0003723			RNA binding [GO:0003723]
EN45_114450	1.82	0.5379	0.004295	0.01132	A0A167X3Z2_PENCH	Uncharacterized protein	282
EN45_023530	1.819	10.9	5.882e-07	1.918e-05	A0A167SHJ8_PENCH	Extracellular membrane protein, CFEM domain protein	245	GO:0016021		integral component of membrane [GO:0016021]
EN45_016740	1.818	0.6924	0.01261	0.02711	A0A167Q1Z8_PENCH	Putative MFS-type transporter	534	GO:0016021; GO:0022857		integral component of membrane [GO:0016021]	transmembrane transporter activity [GO:0022857]
EN45_086490	1.816	5.097	6.623e-06	8.483e-05	A0A162CSW8_PENCH	Glucan 1,4-alpha-glucosidase (EC 3.2.1.3) (1,4-alpha-D-glucan glucohydrolase) (Glucan 1,4-alpha-glucosidase)	488	GO:0004339; GO:0005976	polysaccharide metabolic process [GO:0005976]		glucan 1,4-alpha-glucosidase activity [GO:0004339]
EN45_036870	1.813	4.572	0.00767	0.0181	A0A167PQE7_PENCH	BZIP transcription factor	362
EN45_094690	1.811	2.402	0.000248	0.00115	A0A167Q8N0_PENCH	DUF3421 domain-containing protein	237
EN45_055270	1.81	2.491	0.0001649	0.0008399	A0A167WFZ1_PENCH	SSCRP protein	162
EN45_101730	1.805	0.3857	0.006004	0.01487	A0A167VKS1_PENCH	Nonribosomal peptide synthetase	2076	GO:0016874; GO:0031177			ligase activity [GO:0016874]; phosphopantetheine binding [GO:0031177]
EN45_028520	1.802	5.862	2.075e-07	1.054e-05	A0A167VYD7_PENCH	DUF3431 domain-containing protein	305
EN45_090650	1.802	2.439	5.885e-05	0.0003852	A0A167QKQ3_PENCH	Integral membrane protein	310	GO:0016021		integral component of membrane [GO:0016021]
EN45_079890	1.799	4.768	8.423e-07	2.323e-05	A0A162C1N4_PENCH	Molecular chaperone	252
EN45_050740	1.799	0.5527	0.002871	0.008159	A0A167RF66_PENCH	HMG box-containing protein	629	GO:0006974	cellular response to DNA damage stimulus [GO:0006974]
EN45_080530	1.798	-0.4432	0.01832	0.03702	A0A167R5S1_PENCH	Sugar transporter	516	GO:0008643; GO:0016021; GO:0022857	carbohydrate transport [GO:0008643]	integral component of membrane [GO:0016021]	transmembrane transporter activity [GO:0022857]
EN45_095810	1.796	4.323	4.017e-06	6.184e-05	A0A167RN65_PENCH	Sphingoid long-chain base transporter	291	GO:0016021		integral component of membrane [GO:0016021]
EN45_113570	1.795	6.611	3.333e-08	3.853e-06	A0A167VPI4_PENCH	Aorsin	665	GO:0004252; GO:0005615; GO:0006508; GO:0046872	proteolysis [GO:0006508]	extracellular space [GO:0005615]	metal ion binding [GO:0046872]; serine-type endopeptidase activity [GO:0004252]
EN45_078990	1.79	6.869	2.562e-07	1.176e-05	A0A167V8J9_PENCH	Uncharacterized protein	98	GO:0016021		integral component of membrane [GO:0016021]
EN45_068410	1.788	10.14	8.277e-07	2.323e-05	A0A167TVE0_PENCH	Glutathione S-transferase	223
EN45_055730	1.788	-0.309	0.007403	0.0176	A0A167W2V0_PENCH	Chitinase (EC 3.2.1.14)	852	GO:0000272; GO:0004568; GO:0005576; GO:0005886; GO:0006032; GO:0008061	chitin catabolic process [GO:0006032]; polysaccharide catabolic process [GO:0000272]	extracellular region [GO:0005576]; plasma membrane [GO:0005886]	chitin binding [GO:0008061]; chitinase activity [GO:0004568]
EN45_030990	1.787	7.41	4.93e-08	4.722e-06	A0A167TIF7_PENCH	Pyr_redox_2 domain-containing protein	392	GO:0016491			oxidoreductase activity [GO:0016491]
EN45_047890	1.786	6.901	3.317e-05	0.0002513	A0A167YQ35_PENCH	3-hydroxybenzoate 6-hydroxylase	447	GO:0016491; GO:0044550; GO:0071949	secondary metabolite biosynthetic process [GO:0044550]		FAD binding [GO:0071949]; oxidoreductase activity [GO:0016491]
EN45_024340	1.786	0.2347	0.01032	0.02301	A0A167WSB9_PENCH	Protoglobin domain-containing protein	282	GO:0019825; GO:0020037			heme binding [GO:0020037]; oxygen binding [GO:0019825]
EN45_088350	1.784	5.551	1.467e-08	2.256e-06	A0A167WBY3_PENCH	Putative aspartic-type endopeptidase opsB	455	GO:0004190; GO:0006508	proteolysis [GO:0006508]		aspartic-type endopeptidase activity [GO:0004190]
EN45_054480	1.782	7.392	4.108e-05	0.0002923	A0A161XTU0_PENCH	Secreted protein	336
EN45_076310	1.779	8.95	0.000167	0.0008489	A0A167X458_PENCH	Zinc-regulated transporter	358	GO:0005385; GO:0016021		integral component of membrane [GO:0016021]	zinc ion transmembrane transporter activity [GO:0005385]
EN45_001080	1.777	6.099	3.382e-05	0.0002551	A0A161ZCK0_PENCH	Restriction endonuclease	175
EN45_047760	1.777	4.441	7.002e-05	0.0004353	A0A167XME6_PENCH	MARVEL domain-containing protein	191	GO:0016021		integral component of membrane [GO:0016021]
EN45_085200	1.774	8.63	8.76e-06	0.0001017	A0A167V2U1_PENCH	Altered inheritance of mitochondria protein 6-like protein	370	GO:0006629; GO:0008081; GO:0016021	lipid metabolic process [GO:0006629]	integral component of membrane [GO:0016021]	phosphoric diester hydrolase activity [GO:0008081]
EN45_068070	1.769	4.251	9.012e-06	0.0001033	A0A167SDI1_PENCH	3-oxoacyl-[acyl-carrier-protein] reductase FabG	295	GO:0016491			oxidoreductase activity [GO:0016491]
EN45_034720	1.768	1.933	0.001002	0.003501	A0A161ZIQ2_PENCH	Carboxypeptidase (EC 3.4.16.-)	532	GO:0004185; GO:0006508	proteolysis [GO:0006508]		serine-type carboxypeptidase activity [GO:0004185]
EN45_057320	1.765	5.37	2.731e-07	1.18e-05	A0A167TZ31_PENCH	DNA repair protein	930	GO:0005524; GO:0005634; GO:0016787; GO:0140658		nucleus [GO:0005634]	ATP binding [GO:0005524]; ATP-dependent chromatin remodeler activity [GO:0140658]; hydrolase activity [GO:0016787]
EN45_008510	1.765	4.538	0.000736	0.002728	A0A167VBD0_PENCH	6-hydroxynicotinate 3-monooxygenase	448	GO:0004497; GO:0044550; GO:0071949	secondary metabolite biosynthetic process [GO:0044550]		FAD binding [GO:0071949]; monooxygenase activity [GO:0004497]
EN45_051670	1.756	3.615	1.717e-06	3.684e-05	A0A167TP98_PENCH	Putative HC-toxin efflux carrier TOXA	544	GO:0016021; GO:0022857		integral component of membrane [GO:0016021]	transmembrane transporter activity [GO:0022857]
EN45_096020	1.756	1.393	0.0007948	0.002906	A0A161Z2T2_PENCH	Conidiation-specific protein	131
EN45_094680	1.753	8.836	7.754e-07	2.248e-05	A0A167W5I1_PENCH	Putative sucrose utilization protein	608	GO:0000981; GO:0003677; GO:0005634; GO:0008270		nucleus [GO:0005634]	DNA binding [GO:0003677]; DNA-binding transcription factor activity, RNA polymerase II-specific [GO:0000981]; zinc ion binding [GO:0008270]
EN45_044610	1.752	5.834	2.617e-07	1.176e-05	A0A167V0N7_PENCH	D-lactate dehydrogenase	347	GO:0016616; GO:0051287			NAD binding [GO:0051287]; oxidoreductase activity, acting on the CH-OH group of donors, NAD or NADP as acceptor [GO:0016616]
EN45_053050	1.752	0.5735	0.006154	0.01517	A0A167VKR3_PENCH	UPF0613 protein	350
EN45_032000	1.748	2.261	9.486e-05	0.0005505	A0A167Q3N5_PENCH	Leptomycin B resistance protein	1293	GO:0005524; GO:0016021; GO:0140359		integral component of membrane [GO:0016021]	ABC-type transporter activity [GO:0140359]; ATP binding [GO:0005524]
EN45_007430	1.747	0.5895	0.01401	0.02953	A0A167PZ82_PENCH	Glucoamylase I	389	GO:0000272; GO:2001070	polysaccharide catabolic process [GO:0000272]		starch binding [GO:2001070]
EN45_086560	1.745	0.2623	0.006272	0.0154	A0A167U7K8_PENCH	Putative alpha/beta-glucosidase agdC	952	GO:0005576; GO:0008422; GO:0030246; GO:0032450; GO:0102483		extracellular region [GO:0005576]	beta-glucosidase activity [GO:0008422]; carbohydrate binding [GO:0030246]; maltose alpha-glucosidase activity [GO:0032450]; scopolin beta-glucosidase activity [GO:0102483]
EN45_081650	1.744	8.768	3.175e-07	1.297e-05	A0A161YLJ0_PENCH	Putative transporter	640	GO:0016021; GO:0022857		integral component of membrane [GO:0016021]	transmembrane transporter activity [GO:0022857]
EN45_027540	1.744	-0.01908	0.007391	0.01757	A0A167PR96_PENCH	Mediator complex subunit 11	208
EN45_067000	1.743	6.717	2.172e-07	1.074e-05	A0A167QBK9_PENCH	Putative glucose transporter	524	GO:0008643; GO:0016021; GO:0022857	carbohydrate transport [GO:0008643]	integral component of membrane [GO:0016021]	transmembrane transporter activity [GO:0022857]
EN45_036530	1.737	4.537	1.622e-05	0.000154	A0A167X4Y9_PENCH	Putative membrane protein	282
EN45_009030	1.734	0.4753	0.006752	0.01635	A0A162CQU5_PENCH	Brefeldin A resistance protein	1489	GO:0005524; GO:0005886; GO:0016021; GO:0140359		integral component of membrane [GO:0016021]; plasma membrane [GO:0005886]	ABC-type transporter activity [GO:0140359]; ATP binding [GO:0005524]
EN45_070490	1.733	7.744	2.949e-07	1.25e-05	A0A161Z2V1_PENCH	Thioredoxin-like_fold domain-containing protein	207
EN45_094830	1.733	5.402	3.27e-07	1.322e-05	A0A167XEX1_PENCH	Methylsterol monooxygenase	351	GO:0004497; GO:0005506; GO:0016021; GO:0016126; GO:0044255	cellular lipid metabolic process [GO:0044255]; sterol biosynthetic process [GO:0016126]	integral component of membrane [GO:0016021]	iron ion binding [GO:0005506]; monooxygenase activity [GO:0004497]
EN45_041160	1.732	5.101	5.865e-06	7.839e-05	A0A162BDG7_PENCH	D-alanine-D-alanine ligase	363	GO:0005524; GO:0008716; GO:0046872; GO:0071555	cell wall organization [GO:0071555]		ATP binding [GO:0005524]; D-alanine-D-alanine ligase activity [GO:0008716]; metal ion binding [GO:0046872]
EN45_077500	1.731	5.47	1.795e-05	0.0001635	A0A167VKS9_PENCH	Leptomycin B resistance protein	1316	GO:0005524; GO:0016021; GO:0140359		integral component of membrane [GO:0016021]	ABC-type transporter activity [GO:0140359]; ATP binding [GO:0005524]
EN45_072640	1.728	1.148	0.01134	0.02479	A0A167USU8_PENCH	Integral membrane protein	322	GO:0016021		integral component of membrane [GO:0016021]
EN45_099600	1.724	6.912	2.846e-06	5.051e-05	A0A167W280_PENCH	Zinc-type alcohol dehydrogenase-like protein	447	GO:0008270; GO:0016491			oxidoreductase activity [GO:0016491]; zinc ion binding [GO:0008270]
EN45_016540	1.724	1.259	0.002293	0.006803	A0A162CQP1_PENCH	Boletus edulis lectin	139	GO:0030246			carbohydrate binding [GO:0030246]
EN45_077020	1.723	3.304	1.12e-05	0.0001182	A0A167WF26_PENCH	Sugar transporter	541	GO:0008643; GO:0016021; GO:0022857	carbohydrate transport [GO:0008643]	integral component of membrane [GO:0016021]	transmembrane transporter activity [GO:0022857]
EN45_013860	1.722	2.103	0.0001093	0.0006094	A0A167SPG2_PENCH	Sugar transporter	557	GO:0008643; GO:0016021; GO:0022857	carbohydrate transport [GO:0008643]	integral component of membrane [GO:0016021]	transmembrane transporter activity [GO:0022857]
EN45_089210	1.721	9.688	5.482e-08	4.98e-06	A0A167XJA4_PENCH	Homeobox protein	532	GO:0003677; GO:0005634		nucleus [GO:0005634]	DNA binding [GO:0003677]
EN45_011410	1.718	6.869	8.345e-08	6.285e-06	A0A167Y136_PENCH	Uncharacterized protein	81
EN45_110110	1.709	2.657	2.982e-05	0.0002338	A0A167QBX9_PENCH	Putative oxidoreductase	297	GO:0016491			oxidoreductase activity [GO:0016491]
EN45_014470	1.709	1.15	0.004405	0.01158	A0A167PJZ6_PENCH	1,3-beta-glucanosyltransferase (EC 2.4.1.-)	515	GO:0005576; GO:0005886; GO:0031225; GO:0042123; GO:0071840; GO:0071852	cellular component organization or biogenesis [GO:0071840]; fungal-type cell wall organization or biogenesis [GO:0071852]	anchored component of membrane [GO:0031225]; extracellular region [GO:0005576]; plasma membrane [GO:0005886]	glucanosyltransferase activity [GO:0042123]
EN45_022020	1.708	7.114	2.678e-07	1.176e-05	A0A167XYG2_PENCH	Secreted protein	156
EN45_033820	1.707	4.334	1.031e-05	0.0001128	A0A167PXW6_PENCH	Nitrite reductase	1086	GO:0008942; GO:0020037; GO:0042128; GO:0046872; GO:0051537	nitrate assimilation [GO:0042128]		2 iron, 2 sulfur cluster binding [GO:0051537]; heme binding [GO:0020037]; metal ion binding [GO:0046872]; nitrite reductase [NAD(P)H] activity [GO:0008942]
EN45_111170	1.707	2.239	0.0004085	0.001709	A0A167XYF2_PENCH	Putative glucose transporter	544	GO:0008643; GO:0016021; GO:0022857	carbohydrate transport [GO:0008643]	integral component of membrane [GO:0016021]	transmembrane transporter activity [GO:0022857]
EN45_022510	1.702	6.879	4.454e-08	4.527e-06	B6F254_PENCH	Endo-1,4-beta-xylanase (EC 3.2.1.8)	216	GO:0005576; GO:0031176; GO:0045493	xylan catabolic process [GO:0045493]	extracellular region [GO:0005576]	endo-1,4-beta-xylanase activity [GO:0031176]
EN45_072460	1.702	4.094	7.873e-07	2.261e-05	A0A167R445_PENCH	Ammonium transporter	569	GO:0005886; GO:0008519; GO:0016021		integral component of membrane [GO:0016021]; plasma membrane [GO:0005886]	ammonium transmembrane transporter activity [GO:0008519]
EN45_037690	1.699	3.725	1.607e-06	3.53e-05	A0A167Q108_PENCH	Endo-beta-1,4-glucanase D (Endoglucanase D) (EC 3.2.1.4) (Carboxymethylcellulase D) (Cellulase D)	448	GO:0004497; GO:0005576; GO:0008810; GO:0030245; GO:0030248	cellulose catabolic process [GO:0030245]	extracellular region [GO:0005576]	cellulase activity [GO:0008810]; cellulose binding [GO:0030248]; monooxygenase activity [GO:0004497]
EN45_057310	1.699	5.503	1.706e-06	3.669e-05	A0A167WE95_PENCH	MARVEL domain-containing protein	173	GO:0016021		integral component of membrane [GO:0016021]
EN45_063440	1.694	0.6591	0.01291	0.02761	A0A167Y644_PENCH	Mediator of RNA polymerase II transcription subunit 7	166
EN45_030890	1.693	3.653	4.505e-06	6.596e-05	A0A167X0L8_PENCH	Integral membrane protein	371	GO:0016021		integral component of membrane [GO:0016021]
EN45_019160	1.692	3.484	9.708e-05	0.0005587	A0A167TKQ0_PENCH	Initiation-specific alpha-1,6-mannosyltransferase	385	GO:0000009; GO:0030154; GO:0043934; GO:0048856; GO:1901135	anatomical structure development [GO:0048856]; carbohydrate derivative metabolic process [GO:1901135]; cell differentiation [GO:0030154]; sporulation [GO:0043934]		alpha-1,6-mannosyltransferase activity [GO:0000009]
EN45_093820	1.691	4.07	5.231e-06	7.276e-05	A0A167VT88_PENCH	Glutamate dehydrogenase	461	GO:0000166; GO:0004354; GO:0006520	cellular amino acid metabolic process [GO:0006520]		glutamate dehydrogenase (NADP+) activity [GO:0004354]; nucleotide binding [GO:0000166]
EN45_065400	1.685	3.398	7.637e-06	9.325e-05	A0A167Q1N5_PENCH	Ammonium transporter	473	GO:0005887; GO:0008519		integral component of plasma membrane [GO:0005887]	ammonium transmembrane transporter activity [GO:0008519]
EN45_003410	1.685	1.576	0.004916	0.01264	A0A167QMD9_PENCH	FA_desaturase domain-containing protein	436	GO:0006629; GO:0016021	lipid metabolic process [GO:0006629]	integral component of membrane [GO:0016021]
EN45_033460	1.683	9.592	4.878e-07	1.72e-05	A0A161Z2C3_PENCH	Uncharacterized protein	103
EN45_065690	1.682	5.381	2.819e-06	5.039e-05	A0A167U4W4_PENCH	Asparagine synthetase	674	GO:0004066; GO:0005524; GO:0006529; GO:0006541	asparagine biosynthetic process [GO:0006529]; glutamine metabolic process [GO:0006541]		asparagine synthase (glutamine-hydrolyzing) activity [GO:0004066]; ATP binding [GO:0005524]
EN45_092070	1.681	3.764	1.115e-05	0.0001181	A0A161ZCB7_PENCH	Small secreted protein	146
EN45_017080	1.679	7.554	5.744e-07	1.887e-05	A0A167Q860_PENCH	AB hydrolase-1 domain-containing protein	389
EN45_087770	1.679	8.056	1.129e-06	2.805e-05	A0A167RPG3_PENCH	Arabinan endo-1,5-alpha-L-arabinosidase (EC 3.2.1.99)	322	GO:0031222; GO:0046558	arabinan catabolic process [GO:0031222]		arabinan endo-1,5-alpha-L-arabinosidase activity [GO:0046558]
EN45_074780	1.679	2.391	5.896e-05	0.0003852	A0A167VGI3_PENCH	Transmembrane protein	335	GO:0016021		integral component of membrane [GO:0016021]
EN45_070480	1.677	6.577	4.294e-08	4.445e-06	A0A167QAU5_PENCH	4-carboxymuconolactone decarboxylase	143	GO:0051920			peroxiredoxin activity [GO:0051920]
EN45_028510	1.674	6.936	1.053e-06	2.702e-05	A0A167RM44_PENCH	UPF0173 metal-dependent hydrolase	359	GO:0016787			hydrolase activity [GO:0016787]
EN45_093300	1.673	2.833	7.647e-05	0.0004647	A0A167UQ79_PENCH	Acetamidase regulatory protein	669	GO:0003677; GO:0006351; GO:0008270	DNA-templated transcription [GO:0006351]		DNA binding [GO:0003677]; zinc ion binding [GO:0008270]
EN45_072600	1.673	1.062	0.00627	0.0154	A0A167U8B0_PENCH	MPAB_Lcp_cat domain-containing protein	411	GO:0016021; GO:0016491		integral component of membrane [GO:0016021]	oxidoreductase activity [GO:0016491]
EN45_056230	1.673	4.451	0.006874	0.01656	A0A162BD86_PENCH	Bifunctional solanapyrone synthase	541	GO:0071949			FAD binding [GO:0071949]
EN45_026510	1.671	2.192	0.0005903	0.002282	A0A167XW24_PENCH	RING-type domain-containing protein	201	GO:0046872			metal ion binding [GO:0046872]
EN45_000890	1.671	0.5743	0.005138	0.01307	A0A167RPE2_PENCH	Zinc-regulated transporter	360	GO:0005385; GO:0016021		integral component of membrane [GO:0016021]	zinc ion transmembrane transporter activity [GO:0005385]
EN45_014350	1.671	2.063	0.00733	0.01746	A0A167QE36_PENCH	TrwC domain-containing protein	80
EN45_000320	1.67	7.132	1.504e-06	3.363e-05	A0A167PQF5_PENCH	Uncharacterized protein	254
EN45_062900	1.665	3.155	0.000207	0.0009964	A0A167TDZ1_PENCH	Penicillopepsin (EC 3.4.23.20)	396	GO:0004190; GO:0006508	proteolysis [GO:0006508]		aspartic-type endopeptidase activity [GO:0004190]
EN45_068760	1.664	7.167	6.545e-06	8.456e-05	A0A161Z2W1_PENCH	Putative transporter	524	GO:0016021; GO:0022857		integral component of membrane [GO:0016021]	transmembrane transporter activity [GO:0022857]
EN45_087820	1.663	8.24	4.666e-06	6.71e-05	A0A167W2L0_PENCH	Putative transcriptional regulatory protein	608	GO:0003677; GO:0006351; GO:0008270	DNA-templated transcription [GO:0006351]		DNA binding [GO:0003677]; zinc ion binding [GO:0008270]
EN45_113200	1.661	3.165	4.656e-05	0.0003208	A0A162CPD2_PENCH	Putative extracellular glycosidase	371	GO:0004553; GO:0005886; GO:0005975; GO:0016021; GO:0031225	carbohydrate metabolic process [GO:0005975]	anchored component of membrane [GO:0031225]; integral component of membrane [GO:0016021]; plasma membrane [GO:0005886]	hydrolase activity, hydrolyzing O-glycosyl compounds [GO:0004553]
EN45_080100	1.66	1.497	0.0007339	0.002724	A0A161XZ43_PENCH	Hexose transporter	511	GO:0016021; GO:0022857		integral component of membrane [GO:0016021]	transmembrane transporter activity [GO:0022857]
EN45_071250	1.659	7.136	7.282e-06	9.016e-05	A0A167S234_PENCH	LEA domain protein	1171
EN45_056430	1.658	4.056	3.839e-06	5.985e-05	A0A167TD15_PENCH	F-box domain-containing protein	291
EN45_072140	1.658	4.256	4.294e-06	6.449e-05	A0A167UYX9_PENCH	COBW domain-containing protein	572
EN45_106380	1.658	2.794	5.427e-05	0.0003611	A0A167TKU8_PENCH	GPI-anchored CFEM domain protein	180	GO:0005886; GO:0031225		anchored component of membrane [GO:0031225]; plasma membrane [GO:0005886]
EN45_016580	1.656	2.856	5.938e-05	0.0003867	A0A167QB42_PENCH	Oxalate decarboxylase OxdC	461	GO:0033609; GO:0046872	oxalate metabolic process [GO:0033609]		metal ion binding [GO:0046872]
EN45_074560	1.655	2.615	0.000155	0.0007992	A0A167VL26_PENCH	Endo-polygalacturonase (EC 3.2.1.15)	369	GO:0004650; GO:0005576; GO:0045490; GO:0071555	cell wall organization [GO:0071555]; pectin catabolic process [GO:0045490]	extracellular region [GO:0005576]	polygalacturonase activity [GO:0004650]
EN45_104490	1.651	4.068	7.407e-06	9.133e-05	A0A167VLU4_PENCH	Secreted protein	145
EN45_031990	1.651	0.4594	0.009174	0.02087	A0A167QL44_PENCH	Alpha-amylase A type-3	334	GO:0005576; GO:0005975	carbohydrate metabolic process [GO:0005975]	extracellular region [GO:0005576]
EN45_094980	1.65	1.627	0.001177	0.003971	A0A161ZDQ5_PENCH	Linear gramicidin synthase subunit D	1038	GO:0009058	biosynthetic process [GO:0009058]
EN45_008990	1.65	0.7925	0.00361	0.009837	A0A162CPK8_PENCH	Versicolorin B desaturase	499	GO:0004497; GO:0005506; GO:0016021; GO:0016705; GO:0020037		integral component of membrane [GO:0016021]	heme binding [GO:0020037]; iron ion binding [GO:0005506]; monooxygenase activity [GO:0004497]; oxidoreductase activity, acting on paired donors, with incorporation or reduction of molecular oxygen [GO:0016705]
EN45_059670	1.648	1.045	0.006197	0.01524	A0A167X4X7_PENCH	Sugar transporter	517	GO:0008643; GO:0016021; GO:0022857	carbohydrate transport [GO:0008643]	integral component of membrane [GO:0016021]	transmembrane transporter activity [GO:0022857]
EN45_104790	1.647	2.076	0.001167	0.003948
EN45_101810	1.646	4.297	8.123e-05	0.0004883
EN45_033150	1.645	6.752	4.496e-08	4.527e-06
EN45_104500	1.645	3.061	5.874e-05	0.0003848
EN45_000290	1.644	1.081	0.0008851	0.003157
EN45_026050	1.643	2.204	0.0002759	0.001252
EN45_002890	1.643	1.1	0.001099	0.003767
EN45_110570	1.642	2.899	0.000103	0.0005835
EN45_087190	1.641	4.61	8.937e-06	0.0001025
EN45_068750	1.64	0.979	0.0137	0.029
EN45_070000	1.638	7.475	2.116e-07	1.058e-05
EN45_076630	1.638	8.093	0.002562	0.00745
EN45_099500	1.635	2.939	8.44e-05	0.0005026
EN45_034000	1.629	2.582	0.0001817	0.0009031
EN45_041040	1.627	0.8607	0.002402	0.007079
EN45_056380	1.626	8.815	2.862e-06	5.066e-05
EN45_101800	1.626	0.6932	0.01121	0.02458
EN45_018400	1.625	8.735	2.067e-06	4.076e-05
EN45_021840	1.625	4.447	3.018e-05	0.0002353
EN45_015600	1.623	6.197	2.636e-07	1.176e-05
EN45_021400	1.621	7.6	2.374e-05	0.0001986
EN45_044680	1.621	3.868	0.00016	0.0008194
EN45_022500	1.62	11.02	1.254e-06	3.034e-05
EN45_039700	1.619	6.09	3.107e-07	1.286e-05
EN45_079980	1.615	2.881	0.000101	0.0005767
EN45_035510	1.614	6.72	5.13e-08	4.808e-06
EN45_019400	1.612	6.27	3.644e-07	1.423e-05
EN45_022960	1.611	7.31	6.296e-06	8.206e-05
EN45_105240	1.607	2.81	3.69e-05	0.0002686
EN45_112450	1.605	5.195	7.704e-07	2.248e-05
EN45_009850	1.605	2.141	0.002174	0.006509
EN45_052640	1.602	5.215	4.963e-07	1.731e-05
EN45_034610	1.601	6.783	8.191e-06	9.722e-05
EN45_047900	1.598	3.885	5.355e-05	0.0003565
EN45_114690	1.595	1.103	0.004082	0.01089
EN45_040520	1.593	5.85	2.907e-05	0.0002303
EN45_094270	1.59	10.62	1.214e-05	0.0001246
EN45_037070	1.589	0.414	0.01621	0.0333
EN45_068500	1.588	6.137	7.457e-08	5.927e-06
EN45_024330	1.587	7.062	1.569e-07	8.886e-06
EN45_049900	1.586	4.065	9.485e-06	0.0001062
EN45_010660	1.586	0.2107	0.01743	0.03544
EN45_056220	1.583	3.19	0.0004625	0.001885
EN45_096080	1.582	2.83	3.127e-05	0.0002408
EN45_013820	1.582	1.611	0.01177	0.02558
EN45_089780	1.581	3.675	9.195e-06	0.0001045
EN45_100130	1.579	1.389	0.001303	0.004313
EN45_021720	1.577	4.443	9.899e-07	2.577e-05
EN45_112530	1.577	7.495	2.697e-06	4.9e-05
EN45_093530	1.574	1.591	0.002741	0.007849
EN45_052510	1.574	0.4876	0.01652	0.03385
EN45_011170	1.573	12.82	6.867e-06	8.671e-05
EN45_040310	1.57	8.857	5.615e-07	1.865e-05
EN45_095250	1.568	1.973	0.0002696	0.001229
EN45_033340	1.565	5.332	4.032e-05	0.0002883
EN45_091820	1.565	-0.3606	0.01104	0.02428
EN45_069120	1.563	9.812	3.617e-05	0.0002656
EN45_058440	1.562	5.686	2.669e-06	4.868e-05
EN45_004170	1.561	5.38	6.815e-07	2.07e-05
EN45_070980	1.56	6.342	3.093e-07	1.286e-05
EN45_109240	1.56	1.959	0.0001706	0.0008609
EN45_063060	1.56	0.9418	0.01948	0.03891
EN45_023300	1.554	1.984	0.002647	0.007635
EN45_110520	1.553	5.922	2.28e-07	1.097e-05
EN45_046290	1.552	2.296	0.0006585	0.00249
EN45_015590	1.551	9.14	0.0002456	0.001142
EN45_000040	1.55	2.339	0.000132	0.0007077
EN45_032350	1.55	2.243	0.0005208	0.002073
EN45_039740	1.55	3.03	0.001084	0.003735
EN45_030520	1.547	2.48	0.0001054	0.0005932
EN45_072970	1.546	3.562	9.755e-06	0.0001084
EN45_046940	1.545	1.177	0.002051	0.006192
EN45_103430	1.542	2.244	0.00013	0.0006982
EN45_104510	1.542	9.45	0.001055	0.003651
EN45_046930	1.541	5.276	1.317e-05	0.0001327
EN45_105460	1.538	1.86	0.0005384	0.00212
EN45_111240	1.538	1.8	0.0006988	0.002616
EN45_094370	1.537	2.478	0.001557	0.00499
EN45_019960	1.536	6.395	1.858e-07	9.843e-06
EN45_098750	1.536	7.115	1.138e-06	2.814e-05
EN45_048990	1.533	5.187	0.001837	0.005678
EN45_059380	1.531	4.828	8.439e-07	2.323e-05
EN45_065670	1.531	-0.1586	0.02534	0.04844
EN45_057570	1.53	1.786	0.001856	0.005726
EN45_073370	1.527	3.142	0.0002099	0.001008
EN45_023040	1.525	5.331	3.225e-07	1.311e-05
EN45_068630	1.525	5.455	7.256e-07	2.16e-05
EN45_084230	1.525	4.99	1.036e-06	2.665e-05
EN45_075700	1.523	0.1445	0.009556	0.0216
EN45_052870	1.522	0.4365	0.007439	0.01766
EN45_032680	1.522	0.4231	0.01446	0.03031
EN45_071240	1.521	5.682	5.036e-07	1.731e-05
EN45_077740	1.52	3.819	6.641e-05	0.0004187
EN45_105960	1.518	6.23	1.374e-07	8.322e-06
EN45_111810	1.518	3.916	4.566e-06	6.657e-05
EN45_092910	1.517	4.553	8.498e-07	2.323e-05
EN45_005640	1.514	5.839	2.695e-07	1.176e-05
EN45_110780	1.512	3.755	7.172e-06	8.921e-05
EN45_094200	1.511	1.303	0.007203	0.01721
EN45_011180	1.51	3.865	6.964e-06	8.779e-05
EN45_107720	1.507	2.256	0.001367	0.004478
EN45_103700	1.504	8.209	7.131e-06	8.902e-05
EN45_013910	1.503	2.058	0.003327	0.009214
EN45_066500	1.501	6.669	4.491e-05	0.0003134
EN45_025310	1.501	2.688	0.000946	0.003344
EN45_032020	1.5	1.526	0.0006189	0.002373
EN45_059560	1.497	2.486	0.000531	0.002102
EN45_052580	1.496	7.67	3.376e-07	1.342e-05
EN45_064640	1.495	0.8606	0.003686	0.009995
EN45_031420	1.493	6.421	2.341e-07	1.115e-05
EN45_092900	1.492	9.047	6.056e-06	7.957e-05
EN45_076330	1.492	3.25	0.0001407	0.0007449
EN45_021220	1.492	0.5421	0.005234	0.01325
EN45_042820	1.491	7.7	1.634e-05	0.000154
EN45_039750	1.49	8.365	3.082e-05	0.0002385
EN45_017230	1.489	3.409	3.233e-05	0.0002473
EN45_038250	1.489	3.854	3.148e-05	0.0002421
EN45_050830	1.489	5.111	7.459e-05	0.000457
EN45_076730	1.486	6.003	0.0001343	0.0007172
EN45_062660	1.486	3.053	0.0004493	0.001843
EN45_005500	1.483	1.579	0.000714	0.002664
EN45_060560	1.477	3.658	5.674e-05	0.000375
EN45_000380	1.476	6.085	8.324e-07	2.323e-05
EN45_081550	1.475	4.128	5.35e-06	7.399e-05
EN45_076990	1.473	6.06	2.978e-06	5.198e-05
EN45_025930	1.469	2.418	0.0001332	0.0007134
EN45_046040	1.467	1.089	0.01921	0.03848
EN45_091270	1.466	7.152	3.16e-07	1.297e-05
EN45_030380	1.466	1.416	0.001649	0.005206
EN45_031610	1.465	0.6969	0.006657	0.01617
EN45_115080	1.462	7.314	1.206e-07	7.837e-06
EN45_069660	1.462	2.964	0.001902	0.005825
EN45_055870	1.46	7.155	1.599e-05	0.0001525
EN45_039590	1.459	6.242	1.725e-07	9.271e-06
EN45_077110	1.459	2.581	7.243e-05	0.0004474
EN45_024380	1.459	1.585	0.00767	0.0181
EN45_050840	1.458	5.693	1.482e-07	8.592e-06
EN45_078830	1.458	1.536	0.008882	0.02031
EN45_077450	1.456	6.842	3.658e-06	5.861e-05
EN45_035980	1.455	3.691	0.000111	0.0006166
EN45_006730	1.453	2.353	0.001105	0.00378
EN45_030920	1.453	3.254	0.02359	0.04561
EN45_038290	1.452	9.596	5.982e-06	7.912e-05
EN45_099200	1.452	0.3082	0.00711	0.01704
EN45_008020	1.449	6.673	0.0001484	0.0007755
EN45_093410	1.447	0.6131	0.009683	0.02184
EN45_024190	1.445	7.803	1.039e-07	7.063e-06
EN45_108100	1.445	2.142	0.0001877	0.0009235
EN45_113190	1.443	5.855	2.398e-06	4.497e-05
EN45_000170	1.443	0.4965	0.02238	0.04377
EN45_083470	1.442	0.4947	0.01215	0.02628
EN45_034600	1.44	3.6	2.293e-05	0.0001946
EN45_040680	1.44	3.86	0.0001855	0.0009165
EN45_043390	1.439	0.9428	0.003995	0.01071
EN45_079000	1.436	9.081	1.039e-05	0.0001135
EN45_085040	1.435	7.831	0.0003722	0.001594
EN45_066260	1.434	4.04	1.222e-05	0.0001252
EN45_074090	1.433	8.384	2.019e-06	4.038e-05
EN45_021080	1.432	4.52	0.0002191	0.001042
EN45_070310	1.431	2.328	0.00131	0.004326
EN45_093120	1.43	9.795	0.01435	0.03012
EN45_101020	1.427	2.43	0.001378	0.004508
EN45_066470	1.426	6.279	1.267e-06	3.048e-05
EN45_072260	1.425	2.351	0.0006579	0.002489
EN45_010580	1.424	6.894	2.833e-06	5.044e-05
EN45_102440	1.423	3.569	8.789e-06	0.0001019
EN45_110220	1.423	0.7881	0.004818	0.01245
EN45_076200	1.418	4.913	6.424e-07	2e-05
EN45_112640	1.417	1.936	0.0004613	0.001883
EN45_009510	1.416	2.015	0.000321	0.001411
EN45_085130	1.411	6.132	5.027e-07	1.731e-05
EN45_006790	1.411	4.338	5.802e-06	7.797e-05
EN45_053570	1.41	4.029	2.598e-05	0.0002122
EN45_026000	1.409	4.756	4.757e-06	6.787e-05
EN45_045250	1.409	14.26	7.556e-06	9.265e-05
EN45_048510	1.409	1.526	0.008546	0.01973
EN45_077270	1.408	3.204	0.0001864	0.000919
EN45_022700	1.408	1.933	0.0008009	0.00292
EN45_051380	1.407	10.54	3.322e-06	5.502e-05
EN45_029870	1.407	6.871	3.65e-06	5.861e-05
EN45_103570	1.405	3.903	0.004503	0.01179
EN45_081010	1.401	1.658	0.004945	0.01268
EN45_087920	1.399	2.197	0.002078	0.006264
EN45_097030	1.397	0.8908	0.01106	0.0243
EN45_101820	1.396	7.721	3.002e-06	5.198e-05
EN45_092890	1.395	9.123	1.443e-06	3.301e-05
EN45_099920	1.394	0.4103	0.00811	0.01896
EN45_080340	1.393	0.7197	0.02306	0.04481
EN45_066210	1.392	9.321	3.634e-05	0.0002663
EN45_091320	1.392	1.246	0.00514	0.01307
EN45_072220	1.392	0.3626	0.02228	0.04364
EN45_072780	1.391	6.374	4.915e-07	1.723e-05
EN45_111550	1.388	7.497	7.106e-07	2.137e-05
EN45_017610	1.388	8.404	0.0002604	0.001192
EN45_059570	1.387	3.108	0.0004197	0.001744
EN45_111230	1.387	1.274	0.003454	0.009482
EN45_028360	1.384	3.147	3.677e-05	0.0002682
EN45_032810	1.383	2.325	0.002017	0.006113
EN45_013880	1.382	4.329	5.725e-06	7.71e-05
EN45_021650	1.382	4.483	6.494e-05	0.0004127
EN45_071010	1.381	5.73	0.001673	0.005266
EN45_113170	1.378	0.1475	0.0241	0.04637
EN45_058930	1.377	3.49	6.106e-05	0.0003933
EN45_027090	1.375	7.752	9.533e-07	2.536e-05
EN45_067950	1.375	1.61	0.01607	0.03307
EN45_038760	1.374	1.677	0.004218	0.01117
EN45_044510	1.373	6.24	5.276e-07	1.789e-05
EN45_059340	1.373	1.945	0.005419	0.01366
EN45_112560	1.372	3.162	4.085e-05	0.0002909
EN45_025830	1.371	9.583	8.426e-07	2.323e-05
EN45_095870	1.371	3.062	0.0002584	0.001186
EN45_027950	1.369	4.503	0.001272	0.004227
EN45_037990	1.368	11.11	2.506e-05	0.0002069
EN45_036270	1.368	1.289	0.00969	0.02185
EN45_008230	1.367	0.6867	0.005676	0.01419
EN45_051680	1.366	6.237	3.484e-06	5.697e-05
EN45_017070	1.366	4.158	2.029e-05	0.0001795
EN45_075980	1.365	7.222	7.665e-07	2.244e-05
EN45_020340	1.365	4.617	0.0002352	0.001102
EN45_039320	1.364	0.99	0.00643	0.01572
EN45_104870	1.362	3.887	5.568e-05	0.0003691
EN45_004980	1.361	1.138	0.02354	0.04552
EN45_047990	1.356	3.133	0.0001821	0.0009031
EN45_024200	1.351	3.138	0.002415	0.007112
EN45_048460	1.351	0.2425	0.02304	0.04479
EN45_101110	1.348	7.284	1.493e-06	3.356e-05
EN45_037060	1.347	4.129	2.629e-05	0.0002137
EN45_111790	1.347	4.162	3.831e-05	0.0002775
EN45_071000	1.346	4.669	2.047e-06	4.068e-05
EN45_070380	1.345	6.174	7.837e-07	2.261e-05
EN45_111650	1.345	5.462	5.882e-06	7.842e-05
EN45_095590	1.345	3.587	4.05e-05	0.0002891
EN45_050860	1.345	6.669	3.193e-05	0.0002451
EN45_111540	1.342	6.412	1.989e-07	1.028e-05
EN45_084910	1.341	5.592	1.938e-06	3.957e-05
EN45_039820	1.341	4.987	0.001679	0.005283
EN45_046660	1.341	0.9509	0.01075	0.02375
EN45_058660	1.34	5.974	1.998e-07	1.028e-05
EN45_113700	1.34	7.709	1.072e-06	2.728e-05
EN45_010280	1.34	3.889	3.111e-05	0.0002404
EN45_048400	1.339	8.848	1.624e-06	3.544e-05
EN45_090560	1.339	3.222	0.004355	0.01146
EN45_000210	1.338	5.93	1.103e-06	2.77e-05
EN45_110710	1.338	7.07	4.421e-06	6.532e-05
EN45_034120	1.337	0.2161	0.01183	0.02568
EN45_040510	1.336	1.243	0.004787	0.01238
EN45_051910	1.334	4.356	7.737e-06	9.341e-05
EN45_056690	1.334	1.508	0.002402	0.007079
EN45_012200	1.333	3.729	3.031e-05	0.0002361
EN45_076410	1.33	5.854	1.113e-05	0.000118
EN45_062370	1.33	1.543	0.002599	0.00754
EN45_095570	1.329	1.747	0.01121	0.02458
EN45_066300	1.326	6.947	1.197e-06	2.944e-05
EN45_099310	1.324	6.942	6.271e-07	1.973e-05
EN45_075470	1.322	6.861	2.074e-06	4.076e-05
EN45_021050	1.322	2.058	0.0006798	0.002559
EN45_068280	1.321	3.773	1.147e-05	0.0001197
EN45_081110	1.321	9.498	4.973e-05	0.0003372
EN45_087200	1.319	4.587	5.394e-06	7.424e-05
EN45_039120	1.318	2.68	0.0005481	0.002146
EN45_049920	1.317	4.984	5.483e-06	7.509e-05
EN45_021870	1.316	9.347	0.0001459	0.0007663
EN45_023270	1.314	4.439	2.622e-05	0.0002133
EN45_020190	1.312	2.72	0.0004223	0.001752
EN45_069400	1.311	6.628	6.094e-07	1.947e-05
EN45_068300	1.311	3.434	0.02326	0.04511
EN45_068640	1.31	2.418	0.0003682	0.001578
EN45_067800	1.309	7.431	1.346e-06	3.163e-05
EN45_024990	1.309	6.037	1.961e-06	3.977e-05
EN45_097550	1.309	1.791	0.002449	0.00719
EN45_048550	1.308	4.682	1.009e-06	2.604e-05
EN45_095930	1.304	1.6	0.01262	0.02713
EN45_108070	1.304	1.114	0.02449	0.04702
EN45_046430	1.303	3.739	2.172e-05	0.0001879
EN45_017980	1.301	8.666	2.242e-05	0.0001919
EN45_056800	1.301	3.809	7.065e-05	0.0004389
EN45_024520	1.3	5.213	3.701e-06	5.89e-05
EN45_073710	1.3	4.721	4.791e-06	6.813e-05
EN45_035520	1.298	9.255	2.446e-05	0.0002031
EN45_021030	1.298	2.476	0.00133	0.004382
EN45_015620	1.297	8.01	4.62e-07	1.672e-05
EN45_109520	1.297	4.018	7.727e-06	9.341e-05
EN45_059490	1.295	4.407	5.965e-06	7.912e-05
EN45_045110	1.294	5.7	0.0004415	0.001816
EN45_081470	1.294	1.711	0.01073	0.02373
EN45_025670	1.294	0.5382	0.02205	0.04326
EN45_078720	1.293	11.49	2.294e-06	4.373e-05
EN45_088340	1.29	4.2	1.661e-05	0.0001558
EN45_040560	1.289	6.753	1.486e-05	0.0001451
EN45_020720	1.288	4.638	2.452e-05	0.0002032
EN45_041060	1.288	1.487	0.0153	0.03178
EN45_014120	1.287	13.33	4.305e-06	6.452e-05
EN45_001200	1.286	7.207	1.247e-05	0.0001271
EN45_113280	1.286	3.969	0.0003079	0.001365
EN45_034730	1.286	0.8836	0.009087	0.02071
EN45_092000	1.285	3.271	6.526e-05	0.0004132
EN45_058350	1.285	2.199	0.0004187	0.001742
EN45_114560	1.284	6.611	6.606e-07	2.028e-05
EN45_070880	1.283	3.607	3.417e-05	0.0002569
EN45_047830	1.281	4.901	2.988e-06	5.198e-05
EN45_068320	1.28	2.581	0.0008912	0.003174
EN45_107290	1.279	3.157	8.578e-05	0.0005083
EN45_033450	1.276	6.953	6.812e-07	2.07e-05
EN45_094960	1.275	4.219	7.771e-06	9.341e-05
EN45_031740	1.274	2.271	0.0007938	0.002903
EN45_112520	1.273	12.37	7.334e-06	9.068e-05
EN45_023200	1.272	7.319	5.712e-06	7.705e-05
EN45_037970	1.271	5.591	1.137e-05	0.0001192
EN45_086500	1.271	5.772	2.747e-05	0.000221
EN45_023350	1.27	6.518	4.383e-05	0.0003071
EN45_077440	1.27	5.29	9.854e-05	0.0005645
EN45_040250	1.264	1.345	0.003347	0.009256
EN45_076040	1.261	9.316	4.335e-06	6.474e-05
EN45_045090	1.26	3.254	0.003073	0.008614
EN45_114820	1.259	3.745	0.0009544	0.003367
EN45_089260	1.258	8.164	5.81e-07	1.902e-05
EN45_041480	1.258	2.633	0.001444	0.004675
EN45_113820	1.258	0.844	0.009308	0.02112
EN45_109550	1.256	8.2	4.137e-07	1.541e-05
EN45_091760	1.255	4.174	2.339e-05	0.0001973
EN45_019800	1.254	3.244	0.0001124	0.0006229
EN45_072620	1.253	0.9754	0.01246	0.02684
EN45_098530	1.248	7.469	0.0001015	0.0005786
EN45_110450	1.247	3.533	3.631e-05	0.0002663
EN45_025910	1.246	4.69	5.637e-05	0.0003728
EN45_013870	1.245	2.725	0.0008003	0.002919
EN45_090660	1.245	0.5071	0.02205	0.04326
EN45_006950	1.244	1.762	0.001664	0.005245
EN45_107690	1.242	7.268	7.656e-06	9.325e-05
EN45_038990	1.241	4.853	2.445e-06	4.561e-05
EN45_052060	1.241	2.868	0.0002678	0.001222
EN45_045440	1.24	1.43	0.004269	0.01127
EN45_018740	1.235	7.577	9.464e-06	0.0001062
EN45_031760	1.233	3.676	9.836e-05	0.0005638
EN45_011250	1.232	7.736	3.283e-07	1.322e-05
EN45_078630	1.232	3.066	0.001479	0.004769
EN45_018050	1.231	8.288	4.185e-06	6.346e-05
EN45_067790	1.231	9.262	4.966e-06	6.979e-05
EN45_004050	1.231	4.637	1.722e-05	0.000159
EN45_023140	1.23	6.344	4.407e-07	1.614e-05
EN45_075540	1.229	7.394	1.577e-06	3.497e-05
EN45_056620	1.229	8.847	1.772e-06	3.756e-05
EN45_091040	1.229	3.213	0.0006122	0.002355
EN45_008480	1.228	0.3136	0.01946	0.03889
EN45_003060	1.226	4.8	2.631e-05	0.0002137
EN45_007940	1.225	1.188	0.0184	0.03713
EN45_067780	1.224	4.568	4.233e-05	0.0002991
EN45_109910	1.224	2.393	0.0004736	0.001916
EN45_024700	1.224	0.8781	0.01392	0.02936
EN45_112570	1.223	5.66	3.356e-06	5.532e-05
EN45_027790	1.222	7.38	1.004e-06	2.601e-05
EN45_019380	1.221	6.272	2.328e-06	4.409e-05
EN45_075180	1.22	4.783	1.594e-05	0.0001522
EN45_069430	1.22	7.259	2.092e-05	0.0001835
EN45_061060	1.22	4.492	9.591e-05	0.0005551
EN45_070840	1.217	5.365	0.0001349	0.0007182
EN45_086600	1.217	2.352	0.004074	0.01087
EN45_078710	1.216	7.068	1.395e-06	3.217e-05
EN45_034480	1.215	4.85	9.126e-06	0.000104
EN45_103000	1.215	3.734	0.005596	0.01404
EN45_048560	1.214	8.268	1.23e-06	3.001e-05
EN45_046420	1.214	0.9468	0.01806	0.03657
EN45_001210	1.213	13.69	9.396e-06	0.0001057
EN45_058400	1.212	7.312	4.802e-05	0.0003288
EN45_034650	1.212	0.9256	0.02464	0.04729
EN45_036880	1.212	1.257	0.02484	0.04765
EN45_022680	1.211	7.929	6.255e-07	1.973e-05
EN45_023090	1.211	5.676	1.809e-06	3.789e-05
EN45_036070	1.211	1.62	0.003732	0.01009
EN45_017710	1.21	5.534	1.783e-06	3.77e-05
EN45_069580	1.21	8.637	6.938e-05	0.0004319
EN45_072630	1.209	2.001	0.002162	0.006481
EN45_104800	1.209	3.276	0.004136	0.011
EN45_008530	1.208	2.499	0.0003047	0.001355
EN45_099580	1.207	10.8	2.773e-05	0.0002226
EN45_047860	1.203	1.612	0.01669	0.03414
EN45_080160	1.202	2.081	0.001003	0.003501
EN45_058890	1.201	3.695	0.000535	0.002112
EN45_026160	1.2	5.054	1.171e-06	2.888e-05
EN45_033970	1.199	6.756	1.8e-05	0.0001637
EN45_009450	1.198	5.593	7.255e-07	2.16e-05
EN45_096900	1.198	2.981	0.0003758	0.001603
EN45_095830	1.196	2.941	0.003119	0.008727
EN45_011080	1.196	1.848	0.005991	0.01485
EN45_041590	1.195	4.155	6.776e-06	8.618e-05
EN45_002980	1.195	4.74	0.0001922	0.00094
EN45_075290	1.192	11.94	2.222e-05	0.0001915
EN45_047330	1.192	2.12	0.001001	0.003499
EN45_084240	1.191	2.633	0.0003317	0.001448
EN45_111450	1.19	6.732	3.134e-06	5.355e-05
EN45_043470	1.188	3.386	4.072e-05	0.0002902
EN45_060720	1.186	7.251	2.996e-06	5.198e-05
EN45_020810	1.186	2.471	0.001956	0.00596
EN45_015940	1.186	2.184	0.007438	0.01766
EN45_049060	1.184	6.219	2.198e-06	4.234e-05
EN45_059210	1.184	6.087	4.704e-05	0.0003236
EN45_048160	1.183	9.832	2.169e-06	4.198e-05
EN45_059950	1.183	0.8967	0.01874	0.03768
EN45_046650	1.182	3.388	0.0004098	0.001711
EN45_056320	1.181	6.609	3.598e-07	1.411e-05
EN45_046360	1.18	5.387	1.89e-05	0.0001696
EN45_055860	1.18	8.039	1.837e-05	0.0001662
EN45_051480	1.18	5.241	0.0002187	0.001041
EN45_006260	1.179	4.609	4.434e-06	6.535e-05
EN45_081970	1.178	1.585	0.01177	0.02558
EN45_004180	1.178	0.516	0.02219	0.04349
EN45_066710	1.175	3.419	6.405e-05	0.0004078
EN45_104630	1.175	4.173	0.002877	0.008172
EN45_038490	1.175	2.496	0.00591	0.01466
EN45_033300	1.173	8.014	0.0001059	0.0005947
EN45_088690	1.173	4.476	0.001676	0.005273
EN45_060570	1.172	5.545	2.417e-06	4.52e-05
EN45_056500	1.17	4.284	2.551e-05	0.0002093
EN45_091690	1.17	7.684	0.0001117	0.0006196
EN45_079670	1.169	11.79	6.419e-06	8.33e-05
EN45_021880	1.169	7.667	5.815e-06	7.797e-05
EN45_104650	1.169	3.735	0.0001029	0.0005835
EN45_092710	1.167	4.694	1.481e-05	0.0001448
EN45_029700	1.167	6.688	1.288e-05	0.0001302
EN45_046740	1.167	2.947	0.0005679	0.002205
EN45_078490	1.164	5.181	0.0001063	0.0005968
EN45_024750	1.164	3.833	0.000188	0.0009241
EN45_095460	1.162	6.16	1.842e-06	3.841e-05
EN45_005250	1.162	4.898	1.581e-05	0.0001513
EN45_050330	1.162	4.301	0.0001917	0.0009381
EN45_057230	1.161	4.64	8.93e-05	0.000524
EN45_027920	1.16	6.851	3.207e-05	0.0002457
EN45_098520	1.159	5.318	8.154e-06	9.704e-05
EN45_003380	1.158	7.626	1.081e-05	0.0001162
EN45_039290	1.156	12.23	1.439e-05	0.0001412
EN45_076590	1.156	2.31	0.0007819	0.002867
EN45_088980	1.155	5.674	3.794e-06	5.968e-05
EN45_071560	1.155	3.338	6.789e-05	0.0004247
EN45_070500	1.153	9.318	4.424e-06	6.532e-05
EN45_059600	1.152	3.134	0.0004326	0.00179
EN45_096340	1.151	7.481	1.987e-06	4e-05
EN45_011100	1.151	4.251	1.321e-05	0.0001329
EN45_079830	1.149	1.052	0.01507	0.03137
EN45_080140	1.148	7.794	4.053e-06	6.21e-05
EN45_099390	1.145	8.285	1.854e-06	3.856e-05
EN45_044910	1.145	6.48	5.315e-05	0.0003555
EN45_089310	1.144	4.885	2.936e-06	5.155e-05
EN45_000280	1.142	1.851	0.006459	0.01576
EN45_105470	1.141	2.914	0.0001999	0.0009718
EN45_044870	1.137	6.433	6.568e-06	8.457e-05
EN45_008610	1.135	6.295	1.142e-05	0.0001195
EN45_071650	1.134	9.126	9.034e-07	2.459e-05
EN45_067180	1.133	7.723	3.877e-06	6.034e-05
EN45_098600	1.133	2.798	0.001184	0.003989
EN45_094970	1.131	7.667	8.162e-05	0.00049
EN45_036260	1.13	8.227	0.0001527	0.0007913
EN45_076030	1.129	6.675	3.036e-06	5.238e-05
EN45_010970	1.129	7.106	1.021e-05	0.0001122
EN45_092860	1.129	5.681	3.059e-05	0.0002374
EN45_048720	1.129	0.7029	0.01598	0.03293
EN45_052140	1.128	6.09	7.182e-06	8.921e-05
EN45_047880	1.127	2.297	0.0006399	0.002432
EN45_011000	1.126	8.068	3.773e-06	5.944e-05
EN45_107010	1.124	1.605	0.003428	0.00943
EN45_078760	1.123	3.932	0.0002281	0.001077
EN45_074890	1.12	8.702	1.251e-06	3.033e-05
EN45_073720	1.119	6.098	4.25e-06	6.413e-05
EN45_068780	1.118	10.32	5.992e-06	7.914e-05
EN45_045850	1.115	9.741	1.376e-06	3.189e-05
EN45_091460	1.115	6.365	0.00105	0.00364
EN45_040550	1.114	4.628	7.041e-06	8.843e-05
EN45_046640	1.114	8.232	1.71e-05	0.0001584
EN45_051090	1.114	1.566	0.004361	0.01147
EN45_045310	1.113	4.753	7.002e-05	0.0004353
EN45_064270	1.113	3.767	0.001026	0.003569
EN45_006820	1.113	1.863	0.002032	0.00615
EN45_029130	1.113	1.617	0.01054	0.02341
EN45_051900	1.112	5.179	3.023e-06	5.226e-05
EN45_103660	1.109	4.952	1.513e-05	0.0001464
EN45_037590	1.108	7.748	2.492e-06	4.622e-05
EN45_005950	1.108	5.286	9.035e-06	0.0001033
EN45_066180	1.108	3.923	0.0004492	0.001843
EN45_010270	1.107	4.893	4.998e-05	0.0003386
EN45_067850	1.107	8.299	8.631e-05	0.0005102
EN45_020300	1.107	3.109	0.000352	0.001517
EN45_038430	1.105	3.28	0.0008324	0.003008
EN45_013830	1.104	3.734	5.637e-05	0.0003728
EN45_005480	1.104	3.576	6.43e-05	0.0004089
EN45_019830	1.104	2.716	0.0002593	0.00119
EN45_037310	1.103	6.971	5.347e-05	0.0003565
EN45_111930	1.101	7.889	7.855e-07	2.261e-05
EN45_108720	1.101	2.762	0.0008552	0.003071
EN45_081560	1.101	1.551	0.005705	0.01425
EN45_050380	1.1	6.434	4.577e-06	6.657e-05
EN45_048310	1.099	7.794	0.001198	0.004025
EN45_065060	1.098	5.243	1.373e-05	0.0001372
EN45_097200	1.098	7.242	0.009737	0.02194
EN45_041510	1.097	7.578	1.068e-05	0.0001156
EN45_086140	1.097	2.945	0.0005475	0.002144
EN45_115140	1.097	1.848	0.002696	0.007737
EN45_108760	1.096	1.164	0.02447	0.047
EN45_096870	1.094	5.949	1.108e-06	2.77e-05
EN45_017600	1.094	2.902	0.001123	0.003833
EN45_098460	1.093	7.951	1.507e-05	0.000146
EN45_065420	1.093	8.451	1.898e-05	0.0001701
EN45_000160	1.092	2.857	0.0003286	0.001438
EN45_074080	1.091	5.139	6.632e-06	8.483e-05
EN45_065820	1.091	4.046	0.01041	0.02318
EN45_070090	1.09	9.214	1.56e-05	0.0001499
EN45_102080	1.09	7.124	0.000316	0.001392
EN45_055720	1.09	1.355	0.02114	0.04173
EN45_000140	1.089	4.711	0.0001332	0.0007134
EN45_056410	1.087	1.667	0.004149	0.01102
EN45_051520	1.085	5.593	0.0001298	0.0006975
EN45_079410	1.085	2.572	0.001341	0.004413
EN45_014320	1.084	9.858	2.262e-05	0.0001925
EN45_095720	1.084	3.996	8.114e-05	0.0004881
EN45_114540	1.084	5.129	0.002548	0.007415
EN45_094720	1.083	7.428	0.0002583	0.001186
EN45_045430	1.083	12.45	0.0003518	0.001517
EN45_099130	1.083	0.9656	0.01287	0.02754
EN45_093540	1.082	6.097	1.312e-06	3.105e-05
EN45_048270	1.081	3.151	0.002392	0.007058
EN45_005540	1.078	4.812	1.098e-05	0.0001172
EN45_048520	1.078	2.791	0.0008053	0.002929
EN45_085450	1.078	0.8031	0.02372	0.04578
EN45_027590	1.077	8.44	2.098e-05	0.0001836
EN45_052960	1.077	3.626	0.000144	0.0007576
EN45_002530	1.077	1.66	0.02011	0.04
EN45_060840	1.074	4.851	1.777e-05	0.0001625
EN45_107300	1.074	4.09	7.307e-05	0.0004496
EN45_046260	1.074	2.53	0.005697	0.01423
EN45_007610	1.073	6.182	3.051e-05	0.0002372
EN45_080590	1.073	5.931	5.289e-05	0.0003548
EN45_011950	1.072	3.813	0.0001254	0.000678
EN45_113580	1.071	7.576	0.0001038	0.000587
EN45_017990	1.071	3.03	0.0008433	0.003039
EN45_028800	1.071	2.285	0.001206	0.004048
EN45_093570	1.071	5.05	0.0009387	0.003322
EN45_066740	1.071	3.745	0.001329	0.004381
EN45_113150	1.07	3.066	0.0005252	0.002083
EN45_071510	1.07	2.915	0.0009527	0.003366
EN45_062190	1.07	2.452	0.001195	0.004017
EN45_004990	1.066	3.934	0.0004094	0.001711
EN45_098030	1.066	1.958	0.01439	0.03019
EN45_096680	1.061	6.02	2.1e-05	0.0001836
EN45_092730	1.06	6.734	2.071e-06	4.076e-05
EN45_077990	1.059	8.53	0.001132	0.003853
EN45_070850	1.057	6.909	1.498e-05	0.0001454
EN45_013440	1.057	5.296	6.559e-05	0.0004147
EN45_027940	1.057	3.28	0.0001687	0.000855
EN45_031880	1.056	6.353	3.011e-05	0.0002352
EN45_101350	1.053	5.573	8.904e-06	0.0001023
EN45_093600	1.053	4.002	0.0009004	0.003202
EN45_114550	1.051	5.66	0.0003335	0.001454
EN45_066480	1.05	2.456	0.002625	0.007601
EN45_011510	1.049	5.156	6.054e-06	7.957e-05
EN45_094580	1.049	3.157	0.0004643	0.001889
EN45_004060	1.046	10.01	9.038e-05	0.0005283
EN45_013710	1.044	6.781	1.898e-06	3.903e-05
EN45_031580	1.044	11.77	9.284e-06	0.000105
EN45_050320	1.044	5.269	0.0001021	0.0005806
EN45_090600	1.041	4.833	3.492e-05	0.0002599
EN45_070830	1.041	2.406	0.002346	0.006937
EN45_038880	1.04	2.011	0.006655	0.01617
EN45_021210	1.039	7.787	5.549e-06	7.552e-05
EN45_006810	1.037	6	2.421e-05	0.0002017
EN45_077160	1.037	2.742	0.002326	0.006887
EN45_003270	1.037	3.315	0.002857	0.00812
EN45_094730	1.036	9.171	1.074e-05	0.0001159
EN45_016440	1.036	3.126	0.002164	0.006485
EN45_038420	1.035	3.792	9.034e-05	0.0005283
EN45_049630	1.033	5.702	0.000299	0.001337
EN45_013430	1.032	5.313	4.857e-06	6.896e-05
EN45_058230	1.032	1.945	0.006014	0.0149
EN45_101520	1.031	1.899	0.004159	0.01104
EN45_098840	1.031	2.275	0.00404	0.0108
EN45_053330	1.03	5.542	1.084e-05	0.0001162
EN45_040670	1.03	3.067	0.001561	0.004995
EN45_076280	1.029	4.702	6.063e-05	0.000392
EN45_105190	1.029	1.205	0.02133	0.04204
EN45_078730	1.028	4.842	4.97e-05	0.0003372
EN45_095530	1.028	6.172	6.255e-05	0.0004009
EN45_024790	1.028	4.721	8.911e-05	0.0005236
EN45_006330	1.028	3.228	0.001528	0.004911
EN45_014970	1.027	5.794	1.331e-06	3.142e-05
EN45_065430	1.027	6.47	0.0002402	0.00112
EN45_084820	1.027	2.311	0.001937	0.005913
EN45_031080	1.026	5.638	5.448e-06	7.472e-05
EN45_028040	1.026	2.682	0.01937	0.03874
EN45_105650	1.025	3.508	0.001927	0.005891
EN45_098490	1.024	2.303	0.002263	0.006723
EN45_024110	1.023	5.748	1.261e-05	0.0001281
EN45_022450	1.023	9.65	5.274e-05	0.0003541
EN45_040470	1.023	2.776	0.009889	0.02222
EN45_007480	1.022	5.288	1.178e-05	0.0001219
EN45_019840	1.02	6.037	3.707e-06	5.89e-05
EN45_028500	1.02	10.74	0.0002906	0.001306
EN45_076760	1.02	3.115	0.002834	0.008067
EN45_063620	1.019	2.065	0.003258	0.009062
EN45_072590	1.017	8.668	2.973e-06	5.198e-05
EN45_101600	1.017	9.012	9.566e-06	0.0001068
EN45_028730	1.017	9.084	0.0002197	0.001044
EN45_047320	1.016	5.69	3.158e-06	5.375e-05
EN45_089850	1.015	14.46	0.0001162	0.0006373
EN45_034440	1.013	4.717	0.001188	0.003997
EN45_077140	1.008	8.464	3.768e-06	5.944e-05
EN45_070900	1.007	3.858	0.0004851	0.001951
EN45_077210	1.006	7.794	4.249e-06	6.413e-05
EN45_038380	1.006	5.079	0.0008569	0.003076
EN45_000310	1.005	6.69	4.537e-05	0.0003158
EN45_007130	1.005	4.554	0.0001195	0.0006511
EN45_057210	1.005	7.071	0.002682	0.007713
EN45_052320	1.002	3.474	0.0002004	0.0009728
EN45_044380	1.002	4.604	0.003369	0.009306
EN45_040370	1.001	7.537	8.233e-06	9.747e-05
EN45_065280	1.001	9.187	2.298e-05	0.0001946
EN45_076060	1.001	4.419	2.978e-05	0.0002338
EN45_102720	1.001	3.736	0.0001721	0.0008657
EN45_012560	1	1.515	0.007845	0.01845
EN45_098730	-1	2.554	0.01993	0.0397
EN45_001100	-1.002	6.487	4.906e-05	0.0003336
EN45_049270	-1.002	2.045	0.00621	0.01527
EN45_025970	-1.003	5.988	3.429e-05	0.0002573
EN45_033250	-1.005	6.417	1.665e-05	0.000156
EN45_090760	-1.005	4.886	2.345e-05	0.0001975
EN45_077400	-1.005	5.082	3.528e-05	0.000262
EN45_079880	-1.005	4.958	0.0007282	0.002707
EN45_111760	-1.007	5.401	5.03e-05	0.0003405
EN45_049010	-1.007	3.752	0.0001781	0.0008896
EN45_011730	-1.007	3.421	0.0005218	0.002075
EN45_047460	-1.008	5.954	4.361e-06	6.492e-05
EN45_066760	-1.008	3.853	0.0004706	0.001908
EN45_098080	-1.008	2.467	0.002959	0.008374
EN45_095480	-1.009	4.881	1.006e-05	0.000111
EN45_078590	-1.009	9.65	7.548e-05	0.0004612
EN45_076740	-1.009	3.62	0.0003701	0.001585
EN45_009320	-1.01	6.77	3.609e-06	5.83e-05
EN45_091240	-1.01	3.82	0.0001621	0.0008284
EN45_027000	-1.01	4.038	0.0001761	0.0008816
EN45_008570	-1.01	8.035	0.0007726	0.002837
EN45_096980	-1.012	6.783	0.0001954	0.0009532
EN45_111290	-1.013	10.08	4.393e-05	0.0003075
EN45_079930	-1.015	5.248	8.337e-06	9.804e-05
EN45_106690	-1.015	5.592	0.0002177	0.001037
EN45_060600	-1.015	4.603	0.000573	0.00222
EN45_029600	-1.016	6.121	2.37e-06	4.461e-05
EN45_070440	-1.016	6.24	3.274e-06	5.447e-05
EN45_101540	-1.016	3.444	0.0005456	0.00214
EN45_001540	-1.017	3.198	0.001082	0.003727
EN45_111010	-1.017	2.901	0.007237	0.01728
EN45_052760	-1.017	0.9392	0.02004	0.03988
EN45_028920	-1.018	2.131	0.009977	0.02236
EN45_090080	-1.019	7.963	1.486e-05	0.0001451
EN45_096000	-1.019	5.861	5.937e-05	0.0003867
EN45_092630	-1.019	2.187	0.002975	0.008411
EN45_096300	-1.021	2.917	0.001346	0.004426
EN45_053820	-1.022	4.223	6.09e-05	0.0003929
EN45_079870	-1.024	4.702	0.002464	0.007222
EN45_101380	-1.025	3.632	9.654e-05	0.0005573
EN45_055790	-1.027	4.972	4.494e-06	6.591e-05
EN45_058630	-1.029	4.768	2.222e-05	0.0001915
EN45_031920	-1.029	3.784	8.397e-05	0.000501
EN45_025950	-1.029	3.058	0.002652	0.007642
EN45_028880	-1.03	8.898	0.0001056	0.000594
EN45_113760	-1.031	5.672	0.004656	0.01212
EN45_110180	-1.032	5.245	7.093e-05	0.0004403
EN45_032960	-1.033	4.869	1.351e-05	0.0001356
EN45_052730	-1.034	5.484	6.776e-06	8.618e-05
EN45_021490	-1.034	3.735	4.873e-05	0.0003324
EN45_093230	-1.034	7.896	8.52e-05	0.000506
EN45_018610	-1.035	6.766	6.72e-06	8.571e-05
EN45_051350	-1.036	5.629	1.801e-06	3.789e-05
EN45_033280	-1.036	6.346	2.703e-06	4.901e-05
EN45_105630	-1.036	5.438	5.504e-06	7.526e-05
EN45_045130	-1.036	4.38	0.0001535	0.0007924
EN45_086780	-1.037	2.92	0.008835	0.02024
EN45_032560	-1.039	5.391	4.92e-06	6.956e-05
EN45_000810	-1.039	3.367	0.000466	0.001893
EN45_008760	-1.04	4.369	2.365e-05	0.000198
EN45_005130	-1.04	5.373	6.902e-05	0.0004299
EN45_077030	-1.04	3.256	0.0001622	0.0008285
EN45_071840	-1.04	3.779	0.000532	0.002103
EN45_013370	-1.041	4.258	6.853e-05	0.0004275
EN45_058040	-1.041	6.06	0.0006445	0.002448
EN45_100030	-1.042	1.806	0.006055	0.01497
EN45_083580	-1.043	5.997	7.724e-06	9.341e-05
EN45_054430	-1.044	6.846	6.717e-05	0.0004214
EN45_007320	-1.044	7.909	9.822e-05	0.0005634
EN45_069900	-1.044	6.045	0.0005228	0.002078
EN45_094920	-1.045	5.772	1.6e-05	0.0001525
EN45_084520	-1.045	4.797	3.535e-05	0.000262
EN45_110190	-1.045	5.256	6.525e-05	0.0004132
EN45_004880	-1.045	3.155	0.003827	0.01031
EN45_114840	-1.046	5.068	0.00208	0.006265
EN45_047010	-1.047	4.254	2.083e-05	0.0001831
EN45_001570	-1.048	6.592	5.566e-05	0.0003691
EN45_075830	-1.05	2.67	0.002646	0.007635
EN45_092360	-1.051	7.247	9.503e-06	0.0001063
EN45_060130	-1.053	6.523	0.000203	0.0009829
EN45_008350	-1.055	6.551	0.0001155	0.0006353
EN45_074300	-1.055	6.067	0.0001715	0.0008637
EN45_017560	-1.056	6.477	1.991e-06	4e-05
EN45_112010	-1.056	1.303	0.009971	0.02235
EN45_048490	-1.056	3.126	0.01972	0.03934
EN45_109440	-1.058	4.748	1.972e-05	0.0001759
EN45_076120	-1.058	2.4	0.0009663	0.0034
EN45_034390	-1.059	5.708	5.246e-05	0.0003533
EN45_071710	-1.059	4.555	0.01198	0.02596
EN45_029340	-1.06	3.268	0.003317	0.00919
EN45_098230	-1.06	3.065	0.005168	0.01312
EN45_019710	-1.061	4.574	0.0003125	0.001381
EN45_088130	-1.062	4.592	7.306e-05	0.0004496
EN45_105670	-1.064	3	0.0006196	0.002373
EN45_049860	-1.065	6.002	2.995e-06	5.198e-05
EN45_013460	-1.065	6.75	0.01912	0.03833
EN45_084830	-1.066	2.956	0.001172	0.003959
EN45_040650	-1.066	6.479	0.006881	0.01657
EN45_059390	-1.067	0.9992	0.01527	0.03173
EN45_080810	-1.068	6.873	4.735e-05	0.000325
EN45_011660	-1.068	3.676	0.0001126	0.0006231
EN45_108470	-1.069	6.888	3.497e-06	5.701e-05
EN45_109390	-1.07	5.261	3.667e-06	5.861e-05
EN45_101650	-1.072	5.938	1.086e-06	2.746e-05
EN45_065360	-1.072	4.877	0.0003193	0.001406
EN45_016460	-1.073	5.048	4.091e-06	6.247e-05
EN45_018600	-1.073	4.433	2.787e-05	0.0002235
EN45_047280	-1.074	4.683	8.048e-05	0.0004847
EN45_069290	-1.075	5.471	5.272e-06	7.31e-05
EN45_014880	-1.075	3.718	0.001079	0.003718
EN45_087120	-1.076	6.939	4.62e-05	0.0003195
EN45_057670	-1.076	3.743	0.0001634	0.0008338
EN45_003770	-1.078	4.209	0.02561	0.04887
EN45_007360	-1.079	5.8	3.969e-06	6.126e-05
EN45_045280	-1.081	5.452	2.098e-06	4.078e-05
EN45_089380	-1.081	2.925	0.0003355	0.001462
EN45_035310	-1.081	8.466	0.000485	0.001951
EN45_033500	-1.081	2.682	0.0009586	0.00338
EN45_001860	-1.081	2.325	0.01817	0.03676
EN45_036410	-1.082	3.913	0.0009745	0.003422
EN45_018950	-1.082	3.149	0.004917	0.01264
EN45_038310	-1.083	4.942	3.039e-05	0.0002364
EN45_071150	-1.083	2.569	0.005163	0.01311
EN45_075910	-1.084	2.94	0.0009897	0.003467
EN45_110950	-1.085	5.96	5.647e-06	7.64e-05
EN45_035590	-1.085	3.799	0.0001532	0.0007921
EN45_108810	-1.087	4.687	5.099e-05	0.0003446
EN45_103750	-1.087	4.444	5.778e-05	0.0003799
EN45_012790	-1.087	1.39	0.008801	0.02018
EN45_021180	-1.088	5.509	2.799e-06	5.013e-05
EN45_052390	-1.089	4.612	2.237e-05	0.0001917
EN45_018730	-1.089	4.299	0.0001283	0.000691
EN45_004890	-1.089	3.805	0.0001501	0.000781
EN45_018290	-1.09	3.795	0.0001089	0.0006077
EN45_092450	-1.091	2.33	0.001076	0.003712
EN45_112060	-1.091	9.166	0.001129	0.003846
EN45_055150	-1.093	3.169	0.0009545	0.003367
EN45_088680	-1.093	2.209	0.002547	0.007415
EN45_012270	-1.094	7.68	1.347e-06	3.163e-05
EN45_050710	-1.094	5.559	1.772e-06	3.756e-05
EN45_014160	-1.097	6.173	1.974e-06	3.994e-05
EN45_101300	-1.097	6.08	2.031e-06	4.045e-05
EN45_014670	-1.099	5.175	8.033e-06	9.599e-05
EN45_080430	-1.1	6.403	6.973e-06	8.779e-05
EN45_060810	-1.1	4.169	7.305e-05	0.0004496
EN45_090210	-1.1	1.594	0.01485	0.03097
EN45_040690	-1.101	4.645	0.0002793	0.001264
EN45_015420	-1.103	9.007	9.454e-07	2.535e-05
EN45_070700	-1.103	2.981	0.0002248	0.001064
EN45_013010	-1.104	3.096	0.000294	0.001319
EN45_001340	-1.104	3.347	0.001089	0.003743
EN45_027350	-1.105	7.648	2.12e-05	0.000185
EN45_073320	-1.106	2.223	0.006366	0.0156
EN45_106040	-1.107	3.826	0.0002723	0.001237
EN45_001150	-1.108	5.422	1.548e-05	0.000149
EN45_111200	-1.108	7.985	4.859e-05	0.0003319
EN45_056970	-1.108	2.438	0.0009062	0.003219
EN45_029330	-1.11	4.417	2.065e-05	0.0001818
EN45_114770	-1.11	0.9704	0.02274	0.04437
EN45_096210	-1.111	5.469	5.379e-06	7.424e-05
EN45_089920	-1.111	4.432	3.558e-05	0.0002631
EN45_010940	-1.113	1.427	0.008575	0.01977
EN45_080020	-1.114	2.28	0.003899	0.01047
EN45_066000	-1.115	5.861	1.873e-06	3.887e-05
EN45_052950	-1.115	5.089	2.935e-06	5.155e-05
EN45_086720	-1.116	6.633	0.002211	0.006599
EN45_078920	-1.118	4.939	1.186e-05	0.0001225
EN45_007630	-1.12	4.548	5.048e-06	7.049e-05
EN45_090050	-1.12	6.202	4.383e-05	0.0003071
EN45_005020	-1.121	7.107	1.162e-05	0.0001207
EN45_080950	-1.125	4.153	1.635e-05	0.000154
EN45_071300	-1.125	3.21	0.000181	0.0009004
EN45_008800	-1.126	5.054	2.399e-06	4.497e-05
EN45_099910	-1.127	4.986	2.74e-06	4.947e-05
EN45_096760	-1.127	5.152	4.296e-06	6.449e-05
EN45_076880	-1.128	2.977	0.002296	0.006807
EN45_047420	-1.129	4.94	5.865e-05	0.0003848
EN45_103100	-1.129	2.882	0.004833	0.01247
EN45_110170	-1.13	2.329	0.006638	0.01613
EN45_112080	-1.131	4.353	3.875e-05	0.0002798
EN45_112030	-1.131	7.892	0.002657	0.00765
EN45_108950	-1.134	6.313	1.911e-06	3.92e-05
EN45_049760	-1.134	5.61	1.311e-05	0.0001323
EN45_054010	-1.135	5.007	2.513e-06	4.652e-05
EN45_051240	-1.135	4.266	2.256e-05	0.0001922
EN45_109470	-1.136	7.573	3.729e-06	5.907e-05
EN45_079490	-1.137	6.902	5.94e-07	1.93e-05
EN45_023600	-1.137	7.912	6.103e-07	1.947e-05
EN45_021510	-1.137	5.463	6.459e-06	8.37e-05
EN45_078160	-1.138	4.01	2.166e-05	0.0001877
EN45_112340	-1.138	4.841	2.351e-05	0.0001975
EN45_009700	-1.14	6.231	3.507e-05	0.0002608
EN45_071470	-1.14	1.264	0.008005	0.01876
EN45_096190	-1.141	3.983	5.77e-05	0.0003796
EN45_082380	-1.143	5.27	1.488e-06	3.356e-05
EN45_090300	-1.143	5.14	2.647e-05	0.0002146
EN45_012780	-1.144	4.494	9.661e-05	0.0005574
EN45_096070	-1.146	5.392	9.663e-07	2.553e-05
EN45_084570	-1.146	5.446	1.21e-06	2.96e-05
EN45_020010	-1.146	6.915	1.823e-06	3.809e-05
EN45_018770	-1.147	6.755	2.692e-06	4.9e-05
EN45_047520	-1.147	9.642	0.000466	0.001893
EN45_055400	-1.149	5.146	8.438e-06	9.896e-05
EN45_088750	-1.149	5.597	1.41e-05	0.0001395
EN45_104230	-1.149	3.949	6.695e-05	0.0004213
EN45_073180	-1.15	4.515	8.866e-06	0.0001022
EN45_093840	-1.15	2.802	0.0004789	0.001934
EN45_086040	-1.151	3.481	0.0002799	0.001266
EN45_045380	-1.152	7.518	0.000154	0.000795
EN45_045270	-1.152	3.779	0.0003802	0.001615
EN45_020700	-1.156	6.04	4.785e-06	6.813e-05
EN45_007680	-1.156	8.492	3.575e-05	0.0002635
EN45_070170	-1.156	2.418	0.000712	0.002658
EN45_028220	-1.156	1.452	0.008824	0.02022
EN45_099460	-1.158	6.605	9.752e-07	2.561e-05
EN45_006990	-1.158	8.265	0.0001256	0.0006786
EN45_074180	-1.162	4.78	2.864e-05	0.0002278
EN45_040580	-1.162	4.801	3.257e-05	0.0002482
EN45_018240	-1.163	6.83	1.3e-06	3.104e-05
EN45_056850	-1.163	4.832	4.371e-06	6.495e-05
EN45_101830	-1.163	5.735	7.718e-06	9.341e-05
EN45_106170	-1.163	8.047	2.348e-05	0.0001975
EN45_007380	-1.164	1.641	0.004675	0.01215
EN45_070050	-1.167	4.485	8.293e-06	9.792e-05
EN45_015680	-1.169	4.427	6.038e-05	0.0003911
EN45_074610	-1.169	8.739	0.000153	0.0007917
EN45_068220	-1.17	5.283	1.376e-05	0.0001373
EN45_036330	-1.171	4.801	4.637e-06	6.69e-05
EN45_007980	-1.173	1.009	0.01217	0.02629
EN45_093250	-1.174	5.259	6.06e-06	7.957e-05
EN45_084460	-1.176	8.637	1.237e-05	0.0001264
EN45_000710	-1.179	6.662	3.262e-06	5.446e-05
EN45_106320	-1.179	3.896	1.691e-05	0.0001573
EN45_080400	-1.179	5.471	1.873e-05	0.0001682
EN45_018990	-1.179	5.405	0.0004341	0.001795
EN45_073440	-1.18	8.669	1.988e-05	0.0001768
EN45_055500	-1.182	7.595	1.108e-06	2.77e-05
EN45_050790	-1.182	3.685	3.952e-05	0.0002838
EN45_095030	-1.182	2.038	0.01405	0.0296
EN45_040330	-1.184	8.049	5.927e-05	0.0003867
EN45_048880	-1.185	5.055	3.369e-05	0.0002546
EN45_033620	-1.186	4.095	2.299e-05	0.0001946
EN45_055230	-1.186	2.084	0.003528	0.009645
EN45_077370	-1.188	9.823	0.0007107	0.002654
EN45_106520	-1.189	4.089	3.078e-05	0.0002385
EN45_011220	-1.189	4.703	0.000116	0.0006372
EN45_041560	-1.189	3.379	0.001175	0.003967
EN45_076440	-1.19	5.938	0.0001252	0.0006777
EN45_074190	-1.191	4.678	2.488e-05	0.000206
EN45_048940	-1.192	7.127	4.628e-05	0.0003196
EN45_097070	-1.193	5.614	3.932e-06	6.098e-05
EN45_084750	-1.193	4.931	7.762e-06	9.341e-05
EN45_034870	-1.194	6.462	3.647e-06	5.861e-05
EN45_068930	-1.195	2.732	0.0003909	0.00165
EN45_071200	-1.195	2	0.004581	0.01195
EN45_066050	-1.196	2.565	0.004521	0.01182
EN45_112670	-1.196	6.861	0.002617	0.007581
EN45_072850	-1.197	7.127	1.973e-07	1.028e-05
EN45_017180	-1.197	2.742	0.0003967	0.001672
EN45_000480	-1.197	2.384	0.00186	0.005734
EN45_070640	-1.198	4.903	2.634e-06	4.825e-05
EN45_074140	-1.199	5.07	2.798e-06	5.013e-05
EN45_114530	-1.199	6.844	4.029e-06	6.184e-05
EN45_003520	-1.199	3.72	8.498e-05	0.0005054
EN45_109640	-1.2	4.49	5.626e-06	7.64e-05
EN45_099740	-1.2	3.445	0.0001866	0.0009193
EN45_077040	-1.2	3.923	0.00104	0.003606
EN45_070670	-1.201	5.826	2.082e-06	4.076e-05
EN45_056100	-1.204	3.847	1.729e-05	0.0001595
EN45_073470	-1.204	4.352	7.633e-05	0.0004645
EN45_114980	-1.205	1.908	0.001572	0.005019
EN45_029850	-1.206	8.235	7.516e-06	9.228e-05
EN45_081100	-1.206	7.387	6.244e-05	0.0004005
EN45_076230	-1.206	7.406	0.0002402	0.00112
EN45_060710	-1.207	6.797	6.538e-07	2.014e-05
EN45_021100	-1.207	7.848	0.0001493	0.0007797
EN45_100360	-1.208	4.758	1.159e-05	0.0001206
EN45_018590	-1.211	7.132	8.138e-06	9.698e-05
EN45_013580	-1.215	7.299	2.024e-06	4.039e-05
EN45_069710	-1.216	4.115	7.218e-06	8.949e-05
EN45_029480	-1.216	8.45	4.308e-05	0.0003032
EN45_065570	-1.217	8.262	2.908e-05	0.0002303
EN45_077660	-1.219	3.218	0.0002386	0.001114
EN45_094860	-1.22	6.658	3.785e-07	1.465e-05
EN45_047670	-1.224	6.697	5.665e-07	1.875e-05
EN45_093580	-1.225	4.31	1.765e-05	0.0001623
EN45_054590	-1.226	4.514	7.185e-06	8.921e-05
EN45_053520	-1.227	4.5	1.137e-05	0.0001192
EN45_025480	-1.228	5.012	3.385e-06	5.57e-05
EN45_047000	-1.228	4.644	1.11e-05	0.0001179
EN45_018200	-1.229	4.384	1.574e-05	0.000151
EN45_027260	-1.23	8.344	3.679e-05	0.0002682
EN45_072650	-1.23	2.803	0.005044	0.0129
EN45_032590	-1.231	8.461	1.84e-05	0.0001663
EN45_089860	-1.235	5.615	0.0002416	0.001125
EN45_039980	-1.236	4.093	2.427e-05	0.000202
EN45_068240	-1.242	4.78	4.022e-06	6.184e-05
EN45_011610	-1.243	6.701	1.609e-05	0.0001532
EN45_009220	-1.243	4.099	7.45e-05	0.0004568
EN45_106600	-1.243	2.678	0.0005155	0.002055
EN45_080890	-1.246	5.681	3.606e-06	5.83e-05
EN45_084740	-1.246	8.482	2.392e-05	0.0001999
EN45_031040	-1.247	7.968	2.024e-05	0.0001793
EN45_053860	-1.247	8.729	2.585e-05	0.0002115
EN45_019760	-1.249	4.406	2.848e-06	5.051e-05
EN45_091000	-1.25	7.406	2.089e-05	0.0001834
EN45_048910	-1.251	4.33	1.407e-05	0.0001394
EN45_028590	-1.251	6.912	0.00303	0.008528
EN45_051140	-1.254	3.267	0.0001819	0.0009031
EN45_103830	-1.255	8.344	8.697e-06	0.0001012
EN45_081700	-1.255	2.18	0.001895	0.005808
EN45_011440	-1.256	7.313	2.36e-06	4.46e-05
EN45_087010	-1.257	5.64	3.193e-06	5.415e-05
EN45_000690	-1.258	3.735	1.36e-05	0.000136
EN45_033210	-1.258	4.192	1.78e-05	0.0001627
EN45_018210	-1.258	1.172	0.0113	0.02471
EN45_088860	-1.26	2.118	0.004047	0.01082
EN45_075870	-1.263	2.947	0.001147	0.003889
EN45_072230	-1.263	0.4278	0.01389	0.02931
EN45_036600	-1.265	6.498	3.316e-05	0.0002513
EN45_045290	-1.267	1.401	0.01459	0.03057
EN45_007690	-1.27	8.47	2.889e-05	0.0002294
EN45_096240	-1.27	5.805	0.000399	0.00168
EN45_048250	-1.27	5.565	0.0006243	0.002388
EN45_013100	-1.27	2.293	0.005354	0.01351
EN45_071190	-1.271	2.713	0.01179	0.02561
EN45_060240	-1.272	2.403	0.001673	0.005266
EN45_052740	-1.273	1.308	0.005111	0.01303
EN45_092370	-1.274	7.342	1.792e-07	9.55e-06
EN45_058770	-1.274	8.067	4.398e-06	6.514e-05
EN45_018670	-1.276	5.546	6.669e-07	2.04e-05
EN45_109820	-1.277	5.006	3.513e-06	5.717e-05
EN45_109480	-1.277	2.824	8.601e-05	0.0005087
EN45_033290	-1.278	6.066	1.628e-07	9.039e-06
EN45_111210	-1.279	2.386	0.004889	0.01259
EN45_101690	-1.28	0.7152	0.01571	0.03245
EN45_032580	-1.281	4.073	0.0007217	0.002688
EN45_039070	-1.282	4.648	3.052e-06	5.255e-05
EN45_068130	-1.283	4.461	1.884e-06	3.891e-05
EN45_069380	-1.286	4.54	4.971e-06	6.979e-05
EN45_095150	-1.286	4.865	2.539e-05	0.0002087
EN45_034520	-1.289	8.23	4.564e-06	6.657e-05
EN45_028710	-1.289	7.509	3.795e-05	0.0002751
EN45_040050	-1.29	7.851	1.076e-05	0.000116
EN45_067890	-1.29	1.699	0.00236	0.006973
EN45_113360	-1.291	3.722	2.551e-05	0.0002093
EN45_021240	-1.293	8.419	1.772e-05	0.0001625
EN45_029110	-1.293	2.865	0.004665	0.01213
EN45_058380	-1.294	6.493	1.486e-07	8.592e-06
EN45_023900	-1.294	3.309	2.651e-05	0.0002148
EN45_040270	-1.295	7.447	0.0003064	0.00136
EN45_014220	-1.296	7.376	0.000487	0.001957
EN45_053720	-1.297	4.533	1.359e-06	3.168e-05
EN45_094530	-1.299	5.047	9.869e-07	2.576e-05
EN45_089560	-1.299	7.188	9.652e-07	2.553e-05
EN45_013650	-1.301	5.219	2.892e-05	0.0002294
EN45_105860	-1.302	2.004	0.0004068	0.001704
EN45_099170	-1.309	6.146	1.131e-06	2.805e-05
EN45_015080	-1.309	1.357	0.002236	0.00666
EN45_007780	-1.31	6.439	4.888e-07	1.72e-05
EN45_019610	-1.312	4.948	7.572e-06	9.272e-05
EN45_018550	-1.312	2.887	0.0003059	0.001359
EN45_081290	-1.313	4.951	3.712e-06	5.89e-05
EN45_065290	-1.314	5.449	2.206e-05	0.0001907
EN45_065550	-1.314	6.786	6.357e-05	0.0004057
EN45_049140	-1.315	8.56	7.471e-06	9.198e-05
EN45_016890	-1.316	2.358	0.000496	0.001989
EN45_021430	-1.317	3.982	9.021e-05	0.000528
EN45_078900	-1.317	2.867	0.0003603	0.001547
EN45_040890	-1.32	4.45	5.898e-05	0.0003852
EN45_096750	-1.32	2.556	0.001096	0.003759
EN45_080380	-1.32	1.607	0.00153	0.004914
EN45_040170	-1.321	8.098	9.341e-06	0.0001054
EN45_106540	-1.321	8.363	4.627e-05	0.0003196
EN45_036590	-1.322	7.424	3.22e-05	0.0002465
EN45_048020	-1.323	4.683	2.192e-06	4.233e-05
EN45_024170	-1.325	4.295	0.0001347	0.0007182
EN45_074670	-1.329	3.933	0.0003531	0.001521
EN45_106450	-1.331	4.968	2.316e-06	4.396e-05
EN45_026230	-1.331	8.256	3.458e-05	0.0002583
EN45_108840	-1.332	7.363	8.914e-05	0.0005236
EN45_089680	-1.334	6.99	1.682e-06	3.634e-05
EN45_104590	-1.334	1.766	0.01605	0.03304
EN45_001760	-1.335	3.176	6.598e-05	0.0004162
EN45_029510	-1.336	7.546	8.123e-06	9.694e-05
EN45_001710	-1.338	6.155	3.231e-06	5.437e-05
EN45_079810	-1.338	5.585	1.696e-05	0.0001573
EN45_113050	-1.341	3.69	9.285e-06	0.000105
EN45_114670	-1.341	4.26	9.481e-06	0.0001062
EN45_049380	-1.342	5.466	1.126e-06	2.805e-05
EN45_100940	-1.342	3.89	6.024e-06	7.945e-05
EN45_015070	-1.344	5.178	1.042e-05	0.0001135
EN45_039020	-1.345	6.377	7.437e-08	5.927e-06
EN45_008730	-1.345	4.526	2.208e-06	4.246e-05
EN45_093080	-1.346	4.676	5.526e-06	7.545e-05
EN45_044550	-1.346	3.08	2.574e-05	0.0002108
EN45_087330	-1.347	0.9144	0.005262	0.01331
EN45_028420	-1.348	4.125	5.981e-06	7.912e-05
EN45_083340	-1.349	4.932	1.946e-06	3.964e-05
EN45_112410	-1.351	2.115	0.003286	0.009119
EN45_065940	-1.352	4.677	4.231e-05	0.0002991
EN45_111620	-1.352	2.037	0.002343	0.006932
EN45_054870	-1.353	2.349	0.0003021	0.001345
EN45_017770	-1.354	3.62	3.3e-05	0.0002509
EN45_000350	-1.356	0.1551	0.01707	0.03481
EN45_100050	-1.357	4.179	6.285e-06	8.206e-05
EN45_052010	-1.358	6.095	2.622e-07	1.176e-05
EN45_012030	-1.36	3.377	1.275e-05	0.0001294
EN45_003630	-1.361	8.423	7.971e-07	2.274e-05
EN45_107980	-1.362	1.525	0.005951	0.01476
EN45_053670	-1.364	5.509	3.051e-07	1.281e-05
EN45_008910	-1.367	7.641	1.11e-05	0.0001179
EN45_109500	-1.374	4.68	1.624e-06	3.544e-05
EN45_024470	-1.376	7.833	3.172e-06	5.388e-05
EN45_057460	-1.377	7.366	5.648e-06	7.64e-05
EN45_029390	-1.378	2.597	0.000198	0.0009642
EN45_112040	-1.379	3.168	8.209e-05	0.0004917
EN45_016340	-1.381	0.396	0.01739	0.03537
EN45_020890	-1.383	8.025	1.197e-05	0.0001233
EN45_031250	-1.384	3.204	3.841e-05	0.0002778
EN45_030270	-1.385	9.007	3.075e-07	1.285e-05
EN45_081520	-1.388	4.894	5.131e-07	1.755e-05
EN45_052790	-1.388	2.022	0.0005277	0.002092
EN45_005650	-1.395	7.011	1.263e-06	3.048e-05
EN45_083510	-1.395	7.915	1.079e-05	0.0001162
EN45_079520	-1.399	4.363	8.998e-05	0.000527
EN45_076450	-1.403	4.766	9.901e-06	0.0001095
EN45_104890	-1.403	1.59	0.002007	0.006086
EN45_112160	-1.405	5.963	2.694e-07	1.176e-05
EN45_027010	-1.406	4.164	1.955e-05	0.0001748
EN45_004840	-1.41	5.554	2.855e-05	0.0002277
EN45_070650	-1.411	3.129	5.323e-05	0.0003557
EN45_113740	-1.412	2.228	0.0005746	0.002224
EN45_074910	-1.414	8.567	0.0002031	0.0009829
EN45_029270	-1.416	4.818	6.398e-07	1.998e-05
EN45_098560	-1.416	8.282	4.474e-05	0.0003126
EN45_066660	-1.417	7.749	1.577e-07	8.886e-06
EN45_051260	-1.417	1.899	0.0004079	0.001708
EN45_015870	-1.417	3.299	0.006446	0.01574
EN45_081390	-1.418	5.164	3.815e-07	1.47e-05
EN45_079140	-1.42	5.982	4.378e-06	6.496e-05
EN45_106310	-1.423	5.387	9.357e-06	0.0001054
EN45_031900	-1.423	4.505	7.757e-05	0.0004698
EN45_075130	-1.429	2.471	0.01026	0.02291
EN45_099940	-1.431	2.744	0.00156	0.004993
EN45_035580	-1.432	4.692	9.67e-06	0.0001078
EN45_079110	-1.432	8.503	9.923e-06	0.0001096
EN45_063090	-1.432	0.4817	0.01053	0.02338
EN45_114900	-1.436	1.136	0.01173	0.02552
EN45_046980	-1.437	4.431	1.436e-06	3.301e-05
EN45_039030	-1.437	6.772	0.000186	0.0009183
EN45_032310	-1.439	3.243	2.36e-05	0.0001978
EN45_033090	-1.44	5.436	4.229e-06	6.403e-05
EN45_023780	-1.44	3.102	4.546e-05	0.0003159
EN45_000790	-1.442	4.755	4.988e-07	1.731e-05
EN45_010390	-1.443	5.001	4.186e-07	1.553e-05
EN45_083610	-1.444	1.714	0.00156	0.004993
EN45_065030	-1.444	0.8213	0.01538	0.03191
EN45_091530	-1.446	4.393	5.052e-06	7.049e-05
EN45_098330	-1.447	5.935	1.48e-07	8.592e-06
EN45_061000	-1.448	8.447	1.589e-05	0.0001519
EN45_039640	-1.45	4.733	3.973e-05	0.000285
EN45_074550	-1.451	4.38	1.388e-06	3.21e-05
EN45_073870	-1.455	4.59	1.082e-06	2.743e-05
EN45_112090	-1.455	4.34	1.454e-06	3.318e-05
EN45_047470	-1.456	5.89	9.635e-08	6.807e-06
EN45_112540	-1.456	5.513	1.935e-07	1.019e-05
EN45_033010	-1.458	4.302	7.737e-06	9.341e-05
EN45_089160	-1.464	6.707	1.345e-05	0.0001351
EN45_110620	-1.466	6.398	1.122e-07	7.375e-06
EN45_007500	-1.466	7.612	7.759e-06	9.341e-05
EN45_053440	-1.467	3.733	2.851e-05	0.0002276
EN45_030670	-1.472	8.139	2.657e-06	4.856e-05
EN45_107900	-1.474	1.993	0.001952	0.005951
EN45_071480	-1.474	2.291	0.01044	0.02324
EN45_097790	-1.475	5.369	6.456e-07	2.002e-05
EN45_005830	-1.478	3.553	0.0008896	0.003169
EN45_013320	-1.48	9.848	2.454e-06	4.561e-05
EN45_085100	-1.48	1.524	0.0009887	0.003465
EN45_033100	-1.481	6.957	4.177e-08	4.426e-06
EN45_066010	-1.484	2.981	2.516e-05	0.0002072
EN45_075920	-1.485	8.113	2.341e-05	0.0001973
EN45_068180	-1.485	3.694	3.752e-05	0.0002722
EN45_007730	-1.485	4.035	5.874e-05	0.0003848
EN45_058820	-1.486	4.548	6.858e-06	8.671e-05
EN45_056440	-1.486	0.8148	0.005464	0.01375
EN45_110880	-1.488	2.785	0.0001082	0.0006052
EN45_057650	-1.488	3.964	0.0002976	0.001333
EN45_019150	-1.49	3.777	2.864e-05	0.0002278
EN45_051450	-1.491	4.465	3.124e-05	0.0002408
EN45_019690	-1.492	5.741	7.396e-05	0.000454
EN45_102340	-1.493	5.495	8.513e-06	9.959e-05
EN45_105280	-1.493	0.6466	0.0082	0.01913
EN45_054790	-1.496	4.739	8.488e-07	2.323e-05
EN45_041140	-1.496	4.493	0.0001532	0.0007921
EN45_101510	-1.497	8.218	6.766e-05	0.0004236
EN45_109630	-1.498	5.403	3.932e-07	1.496e-05
EN45_097770	-1.498	3.582	0.0006382	0.002429
EN45_027290	-1.5	5.752	8.268e-06	9.775e-05
EN45_030260	-1.502	3.03	0.003151	0.008796
EN45_037150	-1.504	4.048	3.97e-06	6.126e-05
EN45_051360	-1.506	5.454	5.764e-05	0.0003795
EN45_109980	-1.507	3.941	0.0001163	0.0006373
EN45_055390	-1.507	3.601	0.0001442	0.0007581
EN45_049890	-1.508	5.647	9.851e-08	6.905e-06
EN45_076580	-1.509	4.653	0.0001024	0.0005818
EN45_103220	-1.511	7.86	1.568e-05	0.0001506
EN45_080920	-1.512	4.1	6.584e-06	8.457e-05
EN45_000700	-1.513	5.928	8.534e-08	6.331e-06
EN45_090320	-1.516	6.001	0.0001495	0.0007801
EN45_039250	-1.519	7.818	1.258e-05	0.000128
EN45_097060	-1.519	3.019	0.0001021	0.0005806
EN45_026010	-1.52	7.445	1.714e-05	0.0001586
EN45_100430	-1.526	8.6	7.48e-07	2.212e-05
EN45_058910	-1.529	7.74	6.293e-06	8.206e-05
EN45_084350	-1.529	5.221	4.634e-05	0.0003198
EN45_088240	-1.529	3.24	0.0005509	0.002154
EN45_065450	-1.529	1.028	0.004412	0.01159
EN45_036500	-1.531	5.128	2.085e-06	4.076e-05
EN45_018850	-1.534	5.696	1.655e-07	9.039e-06
EN45_074940	-1.538	4.928	2.102e-06	4.078e-05
EN45_049780	-1.538	2.29	0.0005658	0.002199
EN45_090290	-1.539	2.47	6.163e-05	0.0003961
EN45_080910	-1.54	3.592	3.604e-05	0.000265
EN45_022610	-1.541	7.384	3.33e-06	5.502e-05
EN45_058920	-1.542	7.785	2.622e-06	4.823e-05
EN45_016400	-1.547	4.918	2.14e-05	0.0001863
EN45_075430	-1.548	4.151	6.389e-05	0.0004074
EN45_016040	-1.553	0.6622	0.005496	0.01382
EN45_107820	-1.557	2.461	0.0006168	0.002366
EN45_096130	-1.558	4.015	8.776e-05	0.0005171
EN45_114380	-1.559	2.848	0.0001058	0.0005943
EN45_107780	-1.563	5.683	1.511e-07	8.681e-06
EN45_023620	-1.564	7.952	1.686e-06	3.634e-05
EN45_068250	-1.566	5.651	1.293e-06	3.099e-05
EN45_015010	-1.566	2.761	0.0003754	0.001602
EN45_015730	-1.568	5.215	6.179e-06	8.089e-05
EN45_054090	-1.569	4.325	9.831e-07	2.574e-05
EN45_078340	-1.572	5.703	6.558e-08	5.508e-06
EN45_109670	-1.573	7.528	2.521e-06	4.655e-05
EN45_079840	-1.574	7.523	7.054e-07	2.133e-05
EN45_090270	-1.578	4.827	2.666e-07	1.176e-05
EN45_019620	-1.579	6.024	1.571e-06	3.496e-05
EN45_022390	-1.579	8.345	8.336e-06	9.804e-05
EN45_108400	-1.583	5.374	1.982e-07	1.028e-05
EN45_114040	-1.583	5.57	2.665e-07	1.176e-05
EN45_102890	-1.584	2.013	0.0004482	0.001841
EN45_041100	-1.585	2.037	0.003461	0.009499
EN45_066290	-1.586	3.332	0.0004734	0.001915
EN45_008770	-1.588	3.367	1.149e-05	0.0001197
EN45_037130	-1.589	5.551	8.871e-08	6.473e-06
EN45_107920	-1.589	4.882	9.857e-06	0.0001092
EN45_114010	-1.59	6.764	7.03e-08	5.794e-06
EN45_036540	-1.59	7.565	1.883e-06	3.891e-05
EN45_073520	-1.592	1.324	0.005199	0.01318
EN45_044890	-1.595	6.092	2.104e-07	1.058e-05
EN45_081930	-1.597	1.851	0.0008782	0.003134
EN45_019910	-1.6	6.201	1.054e-05	0.0001146
EN45_049960	-1.601	6.73	8.335e-06	9.804e-05
EN45_013060	-1.602	3.9	1.723e-06	3.687e-05
EN45_004590	-1.604	7.387	8.629e-06	0.0001005
EN45_019250	-1.605	1.504	0.0005649	0.002198
EN45_013000	-1.611	3.036	0.000141	0.0007454
EN45_029230	-1.611	1.281	0.001282	0.004253
EN45_061100	-1.612	4.805	1.652e-07	9.039e-06
EN45_069320	-1.613	7.858	2.221e-07	1.08e-05
EN45_001580	-1.614	2.996	9.667e-05	0.0005574
EN45_068370	-1.616	7	1.064e-07	7.122e-06
EN45_091070	-1.616	3.029	0.0001888	0.0009263
EN45_054160	-1.617	8.105	2.931e-06	5.155e-05
EN45_077650	-1.622	5.078	1.019e-05	0.0001121
EN45_049970	-1.627	7.523	4.448e-06	6.545e-05
EN45_063410	-1.635	2.176	0.0004371	0.001803
EN45_072550	-1.637	5.3	1.92e-06	3.929e-05
EN45_086000	-1.638	0.461	0.01769	0.0359
EN45_019590	-1.64	7.375	1.794e-06	3.785e-05
EN45_005100	-1.64	-0.2364	0.01586	0.03273
EN45_059510	-1.641	4.063	3.265e-06	5.446e-05
EN45_022260	-1.642	1.765	0.003043	0.008557
EN45_066680	-1.643	2.359	4.708e-05	0.0003237
EN45_071800	-1.644	7.623	4.261e-06	6.418e-05
EN45_086810	-1.644	2.592	6.593e-05	0.0004162
EN45_027120	-1.648	7.528	3.063e-06	5.261e-05
EN45_003940	-1.648	2.29	0.000544	0.002135
EN45_054880	-1.653	4.551	2.559e-06	4.717e-05
EN45_054060	-1.653	5.658	7.108e-06	8.887e-05
EN45_079340	-1.654	3.034	3.199e-05	0.0002453
EN45_004290	-1.655	6.11	2.319e-07	1.11e-05
EN45_014060	-1.655	10.34	5.51e-07	1.844e-05
EN45_013700	-1.657	5.932	1.008e-07	6.912e-06
EN45_066060	-1.663	2.46	0.0001052	0.0005926
EN45_012990	-1.664	3.869	2.248e-06	4.304e-05
EN45_006400	-1.669	2.64	5.352e-05	0.0003565
EN45_036720	-1.671	6.714	3.044e-08	3.582e-06
EN45_060300	-1.672	6.472	4.652e-07	1.673e-05
EN45_047250	-1.676	4.369	1.145e-05	0.0001196
EN45_003640	-1.682	5.315	4.105e-07	1.535e-05
EN45_114080	-1.682	1.95	0.0005375	0.002118
EN45_088190	-1.687	-0.412	0.009363	0.02122
EN45_102430	-1.701	7.435	5.885e-06	7.842e-05
EN45_103380	-1.706	3.371	4.581e-06	6.657e-05
EN45_040400	-1.707	4.52	4.318e-07	1.588e-05
EN45_107210	-1.713	3.676	9.758e-06	0.0001084
EN45_070680	-1.715	5.058	4.055e-07	1.527e-05
EN45_106990	-1.72	3.053	0.007325	0.01745
EN45_041570	-1.729	0.4763	0.006367	0.0156
EN45_102790	-1.732	7.46	1.295e-06	3.099e-05
EN45_092180	-1.732	8.161	5.636e-06	7.64e-05
EN45_048690	-1.734	4.146	3.165e-07	1.297e-05
EN45_112280	-1.734	2.39	0.005942	0.01474
EN45_090770	-1.735	8.283	2.074e-06	4.076e-05
EN45_097360	-1.736	3.647	1.619e-05	0.0001539
EN45_002930	-1.738	7.299	2.796e-06	5.013e-05
EN45_095890	-1.741	8.199	8.074e-08	6.25e-06
EN45_035400	-1.742	6.843	3.025e-07	1.276e-05
EN45_052260	-1.744	1.077	0.01311	0.02796
EN45_017930	-1.745	5.705	8.452e-07	2.323e-05
EN45_102280	-1.745	0.6765	0.002825	0.008049
EN45_027140	-1.749	7.906	3.147e-06	5.367e-05
EN45_072510	-1.752	1.984	6.263e-05	0.0004011
EN45_074420	-1.755	5.28	5.147e-07	1.755e-05
EN45_087930	-1.757	1.856	0.0004501	0.001845
EN45_066670	-1.758	6.464	1.47e-08	2.256e-06
EN45_110100	-1.758	1.348	0.007183	0.01717
EN45_024210	-1.759	2.56	0.001095	0.003757
EN45_013530	-1.761	4.799	1.195e-05	0.0001232
EN45_114090	-1.761	0.3973	0.02296	0.04473
EN45_068360	-1.771	5.513	1.219e-07	7.86e-06
EN45_100700	-1.772	2.595	0.00717	0.01715
EN45_066690	-1.778	6.367	1.633e-08	2.464e-06
EN45_017130	-1.779	5.29	3.117e-05	0.0002405
EN45_060780	-1.78	7.074	3.89e-07	1.486e-05
EN45_016180	-1.782	1.918	0.001504	0.004841
EN45_017480	-1.783	6.215	1.16e-05	0.0001206
EN45_028350	-1.793	2.736	0.0001075	0.0006023
EN45_040000	-1.795	0.674	0.002261	0.006721
EN45_029200	-1.801	3.116	4.744e-06	6.787e-05
EN45_103300	-1.804	7.071	8.371e-07	2.323e-05
EN45_109490	-1.81	2.001	0.001814	0.005623
EN45_101860	-1.811	7.842	7.657e-06	9.325e-05
EN45_024290	-1.811	3.034	0.0001483	0.0007755
EN45_035030	-1.817	6.902	1.376e-06	3.189e-05
EN45_021280	-1.818	3.742	0.0001005	0.0005743
EN45_004370	-1.819	1.551	0.001091	0.003746
EN45_019200	-1.82	2.099	5.762e-05	0.0003795
EN45_036210	-1.82	3.296	0.0004585	0.001874
EN45_018300	-1.823	1.312	0.0007573	0.002793
EN45_031210	-1.824	6.9	5.242e-06	7.279e-05
EN45_093510	-1.828	4.881	5.546e-07	1.849e-05
EN45_069610	-1.835	3.471	4.492e-05	0.0003134
EN45_075150	-1.845	1.463	0.001995	0.006063
EN45_047020	-1.847	3.693	3.221e-06	5.431e-05
EN45_020580	-1.85	7.163	1.005e-06	2.601e-05
EN45_078350	-1.853	7.496	4.313e-06	6.453e-05
EN45_087900	-1.87	7.686	2.681e-05	0.0002166
EN45_087320	-1.872	2.13	0.004771	0.01236
EN45_055910	-1.877	2.016	0.0002338	0.001098
EN45_081120	-1.882	0.5325	0.001496	0.00482
EN45_029310	-1.884	2.493	0.0003131	0.001382
EN45_111020	-1.889	2.489	7.63e-05	0.0004645
EN45_075850	-1.891	10.76	1.041e-05	0.0001135
EN45_017490	-1.892	2.526	1.227e-05	0.0001255
EN45_089930	-1.894	3.562	0.0001279	0.0006897
EN45_075950	-1.899	7.857	2.794e-07	1.202e-05
EN45_017440	-1.904	9.308	1.127e-07	7.375e-06
EN45_029260	-1.911	6.329	2.833e-08	3.519e-06
EN45_049670	-1.911	6.339	2.257e-06	4.311e-05
EN45_020620	-1.915	4.031	0.0008079	0.002934
EN45_079430	-1.92	2.021	0.001307	0.004319
EN45_039690	-1.921	0.2721	0.01662	0.03402
EN45_086610	-1.924	0.7576	0.003393	0.009358
EN45_017410	-1.942	8.87	1.635e-05	0.000154
EN45_057410	-1.943	4.108	2.599e-07	1.176e-05
EN45_069550	-1.95	3.848	5.002e-06	7.012e-05
EN45_113880	-1.953	7.834	3.402e-06	5.577e-05
EN45_081260	-1.963	0.239	0.007943	0.01865
EN45_040340	-1.966	8.921	1.291e-08	2.14e-06
EN45_115000	-1.966	6.449	1.282e-05	0.00013
EN45_091770	-1.966	5.366	0.007309	0.01743
EN45_007840	-1.969	2.518	0.00118	0.003978
EN45_025490	-1.974	0.05544	0.003807	0.01026
EN45_085990	-1.978	4.82	5.551e-08	4.991e-06
EN45_110000	-1.981	5.038	3.025e-08	3.582e-06
EN45_038010	-1.992	5.314	8.751e-08	6.438e-06
EN45_066460	-2.001	3.854	7.163e-07	2.147e-05	A0A167TAZ6_PENCH	Putative FAD-linked oxidoreductase	564	GO:0016491; GO:0071949			FAD binding [GO:0071949]; oxidoreductase activity [GO:0016491]
EN45_047780	-2.007	-0.6025	0.005726	0.01429	A0A161XUR8_PENCH	Putative quinate permease	424	GO:0016021; GO:0022857		integral component of membrane [GO:0016021]	transmembrane transporter activity [GO:0022857]
EN45_020290	-2.008	4.864	0.0002496	0.001155	Q2YFD7_PENCH	ATP synthase subunit 9, mitochondrial (Lipid-binding protein)	150	GO:0008289; GO:0015078; GO:0015986; GO:0016021; GO:0045263	proton motive force-driven ATP synthesis [GO:0015986]	integral component of membrane [GO:0016021]; proton-transporting ATP synthase complex, coupling factor F(o) [GO:0045263]	lipid binding [GO:0008289]; proton transmembrane transporter activity [GO:0015078]
EN45_080960	-2.008	6.988	4.865e-06	6.896e-05	A0A167WP30_PENCH	L-ornithine N(5)-monooxygenase (EC 1.14.13.196) (L-ornithine N(5)-oxygenase)	574	GO:0044249; GO:1901566	cellular biosynthetic process [GO:0044249]; organonitrogen compound biosynthetic process [GO:1901566]
EN45_090670	-2.02	0.904	0.001872	0.005761	A0A167QLG9_PENCH	DUF2183 domain-containing protein	487	GO:0008195			phosphatidate phosphatase activity [GO:0008195]
EN45_090340	-2.026	2.935	1.625e-05	0.000154	A0A167QKH4_PENCH	FHA domain-containing protein	516
EN45_040350	-2.03	10.37	2.54e-08	3.341e-06	A0A167YCL7_PENCH	P30 adhesin	226
EN45_032970	-2.036	8.819	1.433e-07	8.56e-06	G9LQX9_PENCH	Pyruvate decarboxylase (EC 4.1.1.1)	570	GO:0000287; GO:0004737; GO:0030976			magnesium ion binding [GO:0000287]; pyruvate decarboxylase activity [GO:0004737]; thiamine pyrophosphate binding [GO:0030976]
EN45_059440	-2.038	3.574	2.366e-06	4.461e-05	A0A167PRA8_PENCH	3-hydroxybenzoate 4-monooxygenase	159	GO:0004497; GO:0044550; GO:0071949	secondary metabolite biosynthetic process [GO:0044550]		FAD binding [GO:0071949]; monooxygenase activity [GO:0004497]
EN45_107970	-2.038	3.948	1.308e-06	3.105e-05	A0A167SN97_PENCH	AB hydrolase superfamily protein	291	GO:0016787			hydrolase activity [GO:0016787]
EN45_005410	-2.046	-0.4894	0.003889	0.01045	A0A167UGT7_PENCH	CipC protein	109
EN45_078570	-2.046	9.552	1.14e-08	2.03e-06	A0A169X3K8_PENCH	Dihydromonacolin L monooxygenase LovA	508	GO:0004497; GO:0005506; GO:0008152; GO:0016705; GO:0020037	metabolic process [GO:0008152]		heme binding [GO:0020037]; iron ion binding [GO:0005506]; monooxygenase activity [GO:0004497]; oxidoreductase activity, acting on paired donors, with incorporation or reduction of molecular oxygen [GO:0016705]
EN45_007010	-2.051	7.287	3.058e-08	3.582e-06	A0A167VJ19_PENCH	Uricase (EC 1.7.3.3) (Urate oxidase)	302	GO:0004846; GO:0005777; GO:0006144; GO:0019628	purine nucleobase metabolic process [GO:0006144]; urate catabolic process [GO:0019628]	peroxisome [GO:0005777]	urate oxidase activity [GO:0004846]
EN45_019790	-2.051	7.305	4.93e-06	6.956e-05	A0A167WMH5_PENCH	Suppressor protein	314	GO:0003723			RNA binding [GO:0003723]
EN45_036200	-2.059	4.069	2.484e-07	1.158e-05	A0A167Y104_PENCH	Respiratory supercomplex factor	96	GO:0016021		integral component of membrane [GO:0016021]
EN45_072210	-2.061	1.79	0.001245	0.004159	A0A167TUV0_PENCH	G_PROTEIN_RECEP_F2_4 domain-containing protein	425	GO:0004888; GO:0007166; GO:0016021	cell surface receptor signaling pathway [GO:0007166]	integral component of membrane [GO:0016021]	transmembrane signaling receptor activity [GO:0004888]
EN45_094220	-2.082	3.969	6.518e-07	2.014e-05	A0A167QW17_PENCH	Transmembrane protein	303	GO:0016021		integral component of membrane [GO:0016021]
EN45_013130	-2.095	-0.8417	0.01204	0.02608	A0A167Y362_PENCH	Pyrid_ox_like domain-containing protein	212
EN45_036930	-2.095	6.588	1.062e-06	2.715e-05	A0A167W2J5_PENCH	Similar to	642	GO:0016021		integral component of membrane [GO:0016021]
EN45_055810	-2.106	5.557	8.228e-08	6.26e-06	A0A167SCX8_PENCH	Transcriptional activator protein	683	GO:0000981; GO:0003677; GO:0005634; GO:0008270		nucleus [GO:0005634]	DNA binding [GO:0003677]; DNA-binding transcription factor activity, RNA polymerase II-specific [GO:0000981]; zinc ion binding [GO:0008270]
EN45_037200	-2.118	7.091	1.322e-08	2.14e-06	A0A167Y3Z3_PENCH	Putative MFS-type transporter	605	GO:0016021; GO:0022857		integral component of membrane [GO:0016021]	transmembrane transporter activity [GO:0022857]
EN45_103740	-2.119	5.86	3.554e-09	1.055e-06	A0A167RM56_PENCH	Glutamate decarboxylase (EC 4.1.1.15)	497	GO:0004351; GO:0006536; GO:0030170	glutamate metabolic process [GO:0006536]		glutamate decarboxylase activity [GO:0004351]; pyridoxal phosphate binding [GO:0030170]
EN45_079260	-2.123	3.343	0.0001978	0.0009637	A0A167UJB0_PENCH	Spo12 family-domain-containing protein	107
EN45_033550	-2.131	7.968	9.441e-08	6.794e-06	A0A167XTC2_PENCH	LEA domain-containing protein	192
EN45_098280	-2.139	7.441	5.402e-06	7.424e-05	A0A167R771_PENCH	Alkali-sensitive linkage protein	265	GO:0005576		extracellular region [GO:0005576]
EN45_029820	-2.143	3.15	2.628e-06	4.824e-05	A0A167XH39_PENCH	Xanthine phosphoribosyltransferase	235	GO:0016021; GO:0016757		integral component of membrane [GO:0016021]	glycosyltransferase activity [GO:0016757]
EN45_055900	-2.149	0.3814	0.00105	0.00364	A0A167SDE4_PENCH	Glycerol-3-phosphate dehydrogenase [NAD(+)] (EC 1.1.1.8)	409	GO:0004367; GO:0005975; GO:0009331; GO:0042803; GO:0046168; GO:0051287	carbohydrate metabolic process [GO:0005975]; glycerol-3-phosphate catabolic process [GO:0046168]	glycerol-3-phosphate dehydrogenase complex [GO:0009331]	glycerol-3-phosphate dehydrogenase [NAD+] activity [GO:0004367]; NAD binding [GO:0051287]; protein homodimerization activity [GO:0042803]
EN45_003930	-2.159	1.2	0.001976	0.00601	A0A167VC79_PENCH	Integral membrane protein	388	GO:0016021		integral component of membrane [GO:0016021]
EN45_078010	-2.164	3.166	3.831e-06	5.983e-05	A0A167UF59_PENCH	Uncharacterized protein	74
EN45_049790	-2.168	1.85	4.017e-05	0.0002877	A0A167RUB4_PENCH	N amino acid transport system protein	426	GO:0016021		integral component of membrane [GO:0016021]
EN45_067260	-2.175	4.082	7.42e-07	2.202e-05	A0A167TDJ4_PENCH	Ribosome assembly factor mrt4	246	GO:0000027; GO:0005730; GO:0005737	ribosomal large subunit assembly [GO:0000027]	cytoplasm [GO:0005737]; nucleolus [GO:0005730]
EN45_019130	-2.179	3.033	0.0006782	0.002555	A0A167WKR2_PENCH	Integral membrane protein	371	GO:0016021		integral component of membrane [GO:0016021]
EN45_049540	-2.181	1.198	0.00245	0.00719	A0A167RTR2_PENCH	Integral membrane protein	364	GO:0016021		integral component of membrane [GO:0016021]
EN45_073250	-2.182	3.634	3.067e-06	5.261e-05	A0A167TYE4_PENCH	INVERT_DEFENSINS domain-containing protein	167
EN45_031710	-2.189	5.38	8.727e-09	1.74e-06	A0A167XMT6_PENCH	Pescadillo homolog (Nucleolar protein 7 homolog)	673	GO:0000463; GO:0000466; GO:0005654; GO:0005730; GO:0030687; GO:0043021	maturation of 5.8S rRNA from tricistronic rRNA transcript (SSU-rRNA, 5.8S rRNA, LSU-rRNA) [GO:0000466]; maturation of LSU-rRNA from tricistronic rRNA transcript (SSU-rRNA, 5.8S rRNA, LSU-rRNA) [GO:0000463]	nucleolus [GO:0005730]; nucleoplasm [GO:0005654]; preribosome, large subunit precursor [GO:0030687]	ribonucleoprotein complex binding [GO:0043021]
EN45_110990	-2.195	4.458	5.805e-08	5.028e-06	A0A167PXP7_PENCH	Putative tubulin-tyrosine ligase	314	GO:0008252; GO:0016874; GO:0046872			ligase activity [GO:0016874]; metal ion binding [GO:0046872]; nucleotidase activity [GO:0008252]
EN45_113160	-2.197	1.557	0.0009371	0.003318	Q8NKC4_PENCH	Aromatic amino acid and leucine permease (Putative proline-specific permease)	559	GO:0016021; GO:0055085	transmembrane transport [GO:0055085]	integral component of membrane [GO:0016021]
EN45_093320	-2.198	2.532	3.655e-06	5.861e-05	A0A162CQT3_PENCH	Uncharacterized protein	309
EN45_066700	-2.211	7.964	2.55e-09	9.459e-07	A0A167TBM8_PENCH	African swine fever virus j13L	83	GO:0016021		integral component of membrane [GO:0016021]
EN45_065440	-2.212	3.23	1.637e-05	0.000154	A0A167T7U8_PENCH	Putative hemerythrin-like protein	192	GO:0055072	iron ion homeostasis [GO:0055072]
EN45_016140	-2.214	8.11	3.532e-08	4.031e-06	A0A167WC64_PENCH	1,3-beta-glucanosyltransferase (EC 2.4.1.-)	538	GO:0005576; GO:0005886; GO:0031225; GO:0042123; GO:0071840; GO:0071852	cellular component organization or biogenesis [GO:0071840]; fungal-type cell wall organization or biogenesis [GO:0071852]	anchored component of membrane [GO:0031225]; extracellular region [GO:0005576]; plasma membrane [GO:0005886]	glucanosyltransferase activity [GO:0042123]
EN45_079690	-2.225	5.192	1.919e-05	0.0001719	A0A167UKQ3_PENCH	Carboxylesterase NlhH	341	GO:0016787			hydrolase activity [GO:0016787]
EN45_070200	-2.231	4.307	4.066e-07	1.527e-05	A0A167TN71_PENCH	TPR domain protein	565
EN45_000490	-2.255	-0.4768	0.005736	0.01431	A0A167V2N2_PENCH	Docosahexaenoic acid omega-hydroxylase	552	GO:0004497; GO:0005506; GO:0008152; GO:0016705; GO:0020037	metabolic process [GO:0008152]		heme binding [GO:0020037]; iron ion binding [GO:0005506]; monooxygenase activity [GO:0004497]; oxidoreductase activity, acting on paired donors, with incorporation or reduction of molecular oxygen [GO:0016705]
EN45_057420	-2.276	3.018	4.621e-06	6.68e-05	A0A167SHL1_PENCH	Protein kinase domain-containing protein	268	GO:0004672; GO:0005524; GO:0006468	protein phosphorylation [GO:0006468]		ATP binding [GO:0005524]; protein kinase activity [GO:0004672]
EN45_056010	-2.277	-0.3125	0.01983	0.03954	A0A167SDU1_PENCH	Putative alpha,alpha-trehalose-phosphate synthase 106 kDa subunit	845	GO:0004805; GO:0005992	trehalose biosynthetic process [GO:0005992]		trehalose-phosphatase activity [GO:0004805]
EN45_088090	-2.278	3.252	1.089e-05	0.0001164	A0A167QEN7_PENCH	Methylenetetrahydrofolate dehydrogenase	334	GO:0004488; GO:0006730	one-carbon metabolic process [GO:0006730]		methylenetetrahydrofolate dehydrogenase (NADP+) activity [GO:0004488]
EN45_107960	-2.286	5.635	3.885e-07	1.486e-05	A0A162CMM1_PENCH	Phenol 2-monooxygenase	309	GO:0004497; GO:0044550; GO:0071949	secondary metabolite biosynthetic process [GO:0044550]		FAD binding [GO:0071949]; monooxygenase activity [GO:0004497]
EN45_024780	-2.287	1.642	0.0004886	0.001962	A0A167X290_PENCH	Mating-type M-specific polypeptide Mc	259	GO:0003677; GO:0005634		nucleus [GO:0005634]	DNA binding [GO:0003677]
EN45_038300	-2.296	7.079	5.729e-07	1.887e-05	A0A167Y707_PENCH	ATPase	784
EN45_073020	-2.308	5.17	4.241e-08	4.442e-06	A0A167TXI0_PENCH	Pyridoxal 5'-phosphate synthase (EC 1.4.3.5)	351	GO:0004733; GO:0008615; GO:0010181	pyridoxine biosynthetic process [GO:0008615]		FMN binding [GO:0010181]; pyridoxamine-phosphate oxidase activity [GO:0004733]
EN45_113440	-2.309	2.755	2.644e-05	0.0002145	A0A167Q2Y1_PENCH	Putative feruloyl esterase A	284	GO:0006629	lipid metabolic process [GO:0006629]
EN45_077190	-2.316	2.713	2.916e-06	5.151e-05	A0A167UC50_PENCH	Transporter	427	GO:0016021; GO:0055085	transmembrane transport [GO:0055085]	integral component of membrane [GO:0016021]
EN45_038060	-2.318	1.9	0.0005689	0.002206	A0A167Y680_PENCH	Extracellular esterase EstB	275	GO:0016042; GO:0016787	lipid catabolic process [GO:0016042]		hydrolase activity [GO:0016787]
EN45_009740	-2.321	6.986	2.863e-07	1.225e-05	A0A167VSQ4_PENCH	ABC1 family protein MCP2-like protein	622
EN45_023370	-2.336	5.393	1.318e-05	0.0001327	A0A167WXY3_PENCH	Allergen Asp f	348	GO:0005576; GO:0019863		extracellular region [GO:0005576]	IgE binding [GO:0019863]
EN45_086400	-2.35	4.925	1.539e-07	8.784e-06	A0A167Q9U9_PENCH	Prolyl 3,4-dihydroxylase	656	GO:0005506; GO:0031418; GO:0031543			iron ion binding [GO:0005506]; L-ascorbic acid binding [GO:0031418]; peptidyl-proline dioxygenase activity [GO:0031543]
EN45_027150	-2.351	1.292	0.0008243	0.002983	A0A167X955_PENCH	Non-structural maintenance of chromosome element	353
EN45_035340	-2.352	2.889	6.078e-07	1.947e-05	A0A167XYJ3_PENCH	Putative transporter	574	GO:0016021; GO:0022857		integral component of membrane [GO:0016021]	transmembrane transporter activity [GO:0022857]
EN45_086590	-2.352	4.291	8.497e-06	9.953e-05	A0A167QAE3_PENCH	GPI anchored protein	202
EN45_035870	-2.357	3.683	1.683e-06	3.634e-05	A0A167Y081_PENCH	Uncharacterized protein	102
EN45_009910	-2.359	0.3157	0.0007467	0.00276	A0A167VT73_PENCH	Mediator of RNA polymerase II transcription subunit 6	211
EN45_061090	-2.372	2.674	1.825e-05	0.0001656	A0A167SUD0_PENCH	Protein-lysine N-methyltransferase EFM6 (EC 2.1.1.-) (Elongation factor methyltransferase 6)	249	GO:0005737; GO:0016279; GO:0018022	peptidyl-lysine methylation [GO:0018022]	cytoplasm [GO:0005737]	protein-lysine N-methyltransferase activity [GO:0016279]
EN45_066450	-2.38	1.417	0.0003212	0.001411	A0A167TAY7_PENCH	Integral membrane protein	312	GO:0016021		integral component of membrane [GO:0016021]
EN45_087760	-2.39	5.58	0.0005235	0.002079	A0A167QDP8_PENCH	Zinc-regulated transporter	351	GO:0005385; GO:0016021		integral component of membrane [GO:0016021]	zinc ion transmembrane transporter activity [GO:0005385]
EN45_090930	-2.393	3.522	1.683e-05	0.0001568	A0A162CQB2_PENCH	Homeobox domain-containing protein	528
EN45_060370	-2.395	3.568	5.664e-06	7.65e-05	A0A167SRG7_PENCH	CENP-C_C domain-containing protein	760
EN45_038320	-2.398	8.315	1.943e-09	7.816e-07	A0A167Y718_PENCH	Zn(2)-C6 fungal-type domain-containing protein	671	GO:0000981; GO:0003677; GO:0005634; GO:0008270		nucleus [GO:0005634]	DNA binding [GO:0003677]; DNA-binding transcription factor activity, RNA polymerase II-specific [GO:0000981]; zinc ion binding [GO:0008270]
EN45_082570	-2.406	2.733	4.682e-05	0.0003223	A0A167UTZ6_PENCH	Methylsterol monooxygenase	554	GO:0004497; GO:0005506; GO:0016021; GO:0016126; GO:0044255	cellular lipid metabolic process [GO:0044255]; sterol biosynthetic process [GO:0016126]	integral component of membrane [GO:0016021]	iron ion binding [GO:0005506]; monooxygenase activity [GO:0004497]
EN45_017290	-2.419	4.226	6.078e-07	1.947e-05	A0A167WFJ5_PENCH	Integral membrane protein	495	GO:0016021		integral component of membrane [GO:0016021]
EN45_006480	-2.43	2.781	3.683e-05	0.0002683	A0A167VGW9_PENCH	Secreted protein	254	GO:0016021		integral component of membrane [GO:0016021]
EN45_055760	-2.432	4.406	0.0002993	0.001337	A0A167SCU0_PENCH	Cell wall protein	804
EN45_011750	-2.438	2.959	8.957e-05	0.0005249	A0A167VYK5_PENCH	Trichodiene oxygenase	503	GO:0004497; GO:0005506; GO:0016705; GO:0020037			heme binding [GO:0020037]; iron ion binding [GO:0005506]; monooxygenase activity [GO:0004497]; oxidoreductase activity, acting on paired donors, with incorporation or reduction of molecular oxygen [GO:0016705]
EN45_065740	-2.465	5.403	1.662e-08	2.466e-06	A0A167T8T4_PENCH	N amino acid transport system protein	606	GO:0016021		integral component of membrane [GO:0016021]
EN45_011770	-2.481	7.468	7.141e-09	1.589e-06	A0A167VYM4_PENCH	Alpha-1,3-glucan synthase (EC 2.4.1.183)	2378	GO:0005576; GO:0005975; GO:0016021; GO:0047657	carbohydrate metabolic process [GO:0005975]	extracellular region [GO:0005576]; integral component of membrane [GO:0016021]	alpha-1,3-glucan synthase activity [GO:0047657]
EN45_083590	-2.481	5.996	6.82e-08	5.674e-06	A0A167UW92_PENCH	Protein pyrABCN	2246	GO:0004070; GO:0004088; GO:0005524; GO:0006207; GO:0006541; GO:0016597; GO:0044205; GO:0046872	'de novo' pyrimidine nucleobase biosynthetic process [GO:0006207]; 'de novo' UMP biosynthetic process [GO:0044205]; glutamine metabolic process [GO:0006541]		amino acid binding [GO:0016597]; aspartate carbamoyltransferase activity [GO:0004070]; ATP binding [GO:0005524]; carbamoyl-phosphate synthase (glutamine-hydrolyzing) activity [GO:0004088]; metal ion binding [GO:0046872]
EN45_006490	-2.487	4.116	3.4e-06	5.577e-05	A0A167VGZ1_PENCH	Putative membrane protein	449	GO:0015267; GO:0016021		integral component of membrane [GO:0016021]	channel activity [GO:0015267]
EN45_078360	-2.491	7.071	9.506e-09	1.763e-06	A0A167UG69_PENCH	Lytic polysaccharide monooxygenase	400
EN45_013330	-2.51	2.506	0.004868	0.01255	A0A167W346_PENCH	Endo-1,6-beta-D-glucanase	497	GO:0004348; GO:0005576; GO:0006665	sphingolipid metabolic process [GO:0006665]	extracellular region [GO:0005576]	glucosylceramidase activity [GO:0004348]
EN45_092190	-2.518	8.448	1.493e-05	0.0001453	A0A167QQK7_PENCH	Antifungal protein (Antifungal protein PAFB)	92
EN45_065300	-2.52	4.818	5.353e-06	7.399e-05	A0A167T7H2_PENCH	D-xylose reductase (NAD(P)H) (EC 1.1.1.307)	315	GO:0016491			oxidoreductase activity [GO:0016491]
EN45_037490	-2.523	2.548	1.481e-05	0.0001448	A0A167Y4K8_PENCH	AAA domain-containing protein	2033
EN45_046630	-2.529	7.136	2.727e-07	1.18e-05	A0A167YSE6_PENCH	RNA-binding domain-containing protein	540	GO:0003723			RNA binding [GO:0003723]
EN45_025400	-2.537	1.224	4.02e-05	0.0002877	A0A167X3Z2_PENCH	Uncharacterized protein	282
EN45_057390	-2.54	0.8236	0.001697	0.00533	A0A167SHJ8_PENCH	Extracellular membrane protein, CFEM domain protein	245	GO:0016021		integral component of membrane [GO:0016021]
EN45_113140	-2.543	2.979	9.107e-07	2.472e-05	A0A167Q1Z8_PENCH	Putative MFS-type transporter	534	GO:0016021; GO:0022857		integral component of membrane [GO:0016021]	transmembrane transporter activity [GO:0022857]
EN45_085960	-2.549	2.477	3.537e-05	0.000262	A0A162CSW8_PENCH	Glucan 1,4-alpha-glucosidase (EC 3.2.1.3) (1,4-alpha-D-glucan glucohydrolase) (Glucan 1,4-alpha-glucosidase)	488	GO:0004339; GO:0005976	polysaccharide metabolic process [GO:0005976]		glucan 1,4-alpha-glucosidase activity [GO:0004339]
EN45_102950	-2.549	5.503	1.228e-07	7.861e-06	A0A167PQE7_PENCH	BZIP transcription factor	362
EN45_107510	-2.549	2.029	1.184e-05	0.0001224	A0A167Q8N0_PENCH	DUF3421 domain-containing protein	237
EN45_017430	-2.557	6.247	2.266e-07	1.096e-05	A0A167WFZ1_PENCH	SSCRP protein	162
EN45_007550	-2.559	0.3163	0.001013	0.003532	A0A167VKS1_PENCH	Nonribosomal peptide synthetase	2076	GO:0016874; GO:0031177			ligase activity [GO:0016874]; phosphopantetheine binding [GO:0031177]
EN45_011680	-2.57	2.114	0.0003304	0.001443	A0A167VYD7_PENCH	DUF3431 domain-containing protein	305
EN45_090390	-2.577	2.359	4.756e-06	6.787e-05	A0A167QKQ3_PENCH	Integral membrane protein	310	GO:0016021		integral component of membrane [GO:0016021]
EN45_093650	-2.612	-0.6261	0.003481	0.009537	A0A162C1N4_PENCH	Molecular chaperone	252
EN45_101030	-2.613	1.531	0.001899	0.00582	A0A167RF66_PENCH	HMG box-containing protein	629	GO:0006974	cellular response to DNA damage stimulus [GO:0006974]
EN45_097830	-2.621	1.234	0.001231	0.004118	A0A167R5S1_PENCH	Sugar transporter	516	GO:0008643; GO:0016021; GO:0022857	carbohydrate transport [GO:0008643]	integral component of membrane [GO:0016021]	transmembrane transporter activity [GO:0022857]
EN45_104220	-2.624	6.089	5.384e-09	1.365e-06	A0A167RN65_PENCH	Sphingoid long-chain base transporter	291	GO:0016021		integral component of membrane [GO:0016021]
EN45_008660	-2.631	1.359	9.067e-05	0.0005296	A0A167VPI4_PENCH	Aorsin	665	GO:0004252; GO:0005615; GO:0006508; GO:0046872	proteolysis [GO:0006508]	extracellular space [GO:0005615]	metal ion binding [GO:0046872]; serine-type endopeptidase activity [GO:0004252]
EN45_002620	-2.666	-0.6994	0.01086	0.02394	A0A167V8J9_PENCH	Uncharacterized protein	98	GO:0016021		integral component of membrane [GO:0016021]
EN45_072380	-2.675	1.216	3.417e-05	0.0002569	A0A167TVE0_PENCH	Glutathione S-transferase	223
EN45_013230	-2.684	3.184	5.273e-05	0.0003541	A0A167W2V0_PENCH	Chitinase (EC 3.2.1.14)	852	GO:0000272; GO:0004568; GO:0005576; GO:0005886; GO:0006032; GO:0008061	chitin catabolic process [GO:0006032]; polysaccharide catabolic process [GO:0000272]	extracellular region [GO:0005576]; plasma membrane [GO:0005886]	chitin binding [GO:0008061]; chitinase activity [GO:0004568]
EN45_068800	-2.686	6.95	7.395e-10	4.389e-07	A0A167TIF7_PENCH	Pyr_redox_2 domain-containing protein	392	GO:0016491			oxidoreductase activity [GO:0016491]
EN45_045860	-2.689	5.583	1.337e-09	6.264e-07	A0A167YQ35_PENCH	3-hydroxybenzoate 6-hydroxylase	447	GO:0016491; GO:0044550; GO:0071949	secondary metabolite biosynthetic process [GO:0044550]		FAD binding [GO:0071949]; oxidoreductase activity [GO:0016491]
EN45_021360	-2.702	5.499	2.1e-06	4.078e-05	A0A167WSB9_PENCH	Protoglobin domain-containing protein	282	GO:0019825; GO:0020037			heme binding [GO:0020037]; oxygen binding [GO:0019825]
EN45_016080	-2.716	3.186	2.945e-06	5.161e-05	A0A167WBY3_PENCH	Putative aspartic-type endopeptidase opsB	455	GO:0004190; GO:0006508	proteolysis [GO:0006508]		aspartic-type endopeptidase activity [GO:0004190]
EN45_100680	-2.749	2.448	7.099e-06	8.887e-05	A0A161XTU0_PENCH	Secreted protein	336
EN45_025470	-2.809	2.438	7.285e-05	0.0004491	A0A167X458_PENCH	Zinc-regulated transporter	358	GO:0005385; GO:0016021		integral component of membrane [GO:0016021]	zinc ion transmembrane transporter activity [GO:0005385]
EN45_082410	-2.822	0.1181	0.01795	0.03636	A0A161ZCK0_PENCH	Restriction endonuclease	175
EN45_031570	-2.832	2.288	0.002501	0.007308	A0A167XME6_PENCH	MARVEL domain-containing protein	191	GO:0016021		integral component of membrane [GO:0016021]
EN45_000540	-2.837	5.009	1.316e-08	2.14e-06	A0A167V2U1_PENCH	Altered inheritance of mitochondria protein 6-like protein	370	GO:0006629; GO:0008081; GO:0016021	lipid metabolic process [GO:0006629]	integral component of membrane [GO:0016021]	phosphoric diester hydrolase activity [GO:0008081]
EN45_055940	-2.84	4.248	1.037e-05	0.0001134	A0A167SDI1_PENCH	3-oxoacyl-[acyl-carrier-protein] reductase FabG	295	GO:0016491			oxidoreductase activity [GO:0016491]
EN45_023060	-2.851	0.6092	0.007964	0.01869	A0A161ZIQ2_PENCH	Carboxypeptidase (EC 3.4.16.-)	532	GO:0004185; GO:0006508	proteolysis [GO:0006508]		serine-type carboxypeptidase activity [GO:0004185]
EN45_073420	-2.854	0.5674	0.0001284	0.0006911	A0A167TZ31_PENCH	DNA repair protein	930	GO:0005524; GO:0005634; GO:0016787; GO:0140658		nucleus [GO:0005634]	ATP binding [GO:0005524]; ATP-dependent chromatin remodeler activity [GO:0140658]; hydrolase activity [GO:0016787]
EN45_003650	-2.873	4.537	8.46e-07	2.323e-05	A0A167VBD0_PENCH	6-hydroxynicotinate 3-monooxygenase	448	GO:0004497; GO:0044550; GO:0071949	secondary metabolite biosynthetic process [GO:0044550]		FAD binding [GO:0071949]; monooxygenase activity [GO:0004497]
EN45_070530	-2.898	-1.124	0.02129	0.04199	A0A167TP98_PENCH	Putative HC-toxin efflux carrier TOXA	544	GO:0016021; GO:0022857		integral component of membrane [GO:0016021]	transmembrane transporter activity [GO:0022857]
EN45_107100	-2.907	6.734	5.508e-09	1.365e-06	A0A161Z2T2_PENCH	Conidiation-specific protein	131
EN45_014150	-2.91	2.659	9.035e-06	0.0001033	A0A167W5I1_PENCH	Putative sucrose utilization protein	608	GO:0000981; GO:0003677; GO:0005634; GO:0008270		nucleus [GO:0005634]	DNA binding [GO:0003677]; DNA-binding transcription factor activity, RNA polymerase II-specific [GO:0000981]; zinc ion binding [GO:0008270]
EN45_085080	-2.929	4.398	3.721e-07	1.447e-05	A0A167V0N7_PENCH	D-lactate dehydrogenase	347	GO:0016616; GO:0051287			NAD binding [GO:0051287]; oxidoreductase activity, acting on the CH-OH group of donors, NAD or NADP as acceptor [GO:0016616]
EN45_007540	-2.953	2.011	0.0001408	0.0007449	A0A167VKR3_PENCH	UPF0613 protein	350
EN45_113710	-2.998	1.091	0.0003761	0.001603	A0A167Q3N5_PENCH	Leptomycin B resistance protein	1293	GO:0005524; GO:0016021; GO:0140359		integral component of membrane [GO:0016021]	ABC-type transporter activity [GO:0140359]; ATP binding [GO:0005524]
EN45_111530	-3.016	2.099	3.831e-06	5.983e-05	A0A167PZ82_PENCH	Glucoamylase I	389	GO:0000272; GO:2001070	polysaccharide catabolic process [GO:0000272]		starch binding [GO:2001070]
EN45_075930	-3.12	6.012	8.588e-06	0.0001002	A0A167U7K8_PENCH	Putative alpha/beta-glucosidase agdC	952	GO:0005576; GO:0008422; GO:0030246; GO:0032450; GO:0102483		extracellular region [GO:0005576]	beta-glucosidase activity [GO:0008422]; carbohydrate binding [GO:0030246]; maltose alpha-glucosidase activity [GO:0032450]; scopolin beta-glucosidase activity [GO:0102483]
EN45_007870	-3.166	4.16	3.267e-06	5.446e-05	A0A161YLJ0_PENCH	Putative transporter	640	GO:0016021; GO:0022857		integral component of membrane [GO:0016021]	transmembrane transporter activity [GO:0022857]
EN45_087030	-3.2	4.47	0.0001085	0.0006069	A0A167PR96_PENCH	Mediator complex subunit 11	208
EN45_107940	-3.2	3.469	1.497e-06	3.357e-05	A0A167QBK9_PENCH	Putative glucose transporter	524	GO:0008643; GO:0016021; GO:0022857	carbohydrate transport [GO:0008643]	integral component of membrane [GO:0016021]	transmembrane transporter activity [GO:0022857]
EN45_025760	-3.208	0.7379	0.0002663	0.001218	A0A167X4Y9_PENCH	Putative membrane protein	282
EN45_093620	-3.208	2.645	0.0004061	0.001702	A0A162CQU5_PENCH	Brefeldin A resistance protein	1489	GO:0005524; GO:0005886; GO:0016021; GO:0140359		integral component of membrane [GO:0016021]; plasma membrane [GO:0005886]	ABC-type transporter activity [GO:0140359]; ATP binding [GO:0005524]
EN45_107420	-3.212	4.529	5.818e-08	5.028e-06	A0A161Z2V1_PENCH	Thioredoxin-like_fold domain-containing protein	207
EN45_029020	-3.227	1.474	1.635e-05	0.000154	A0A167XEX1_PENCH	Methylsterol monooxygenase	351	GO:0004497; GO:0005506; GO:0016021; GO:0016126; GO:0044255	cellular lipid metabolic process [GO:0044255]; sterol biosynthetic process [GO:0016126]	integral component of membrane [GO:0016021]	iron ion binding [GO:0005506]; monooxygenase activity [GO:0004497]
EN45_107950	-3.251	3.216	6.626e-06	8.483e-05	A0A162BDG7_PENCH	D-alanine-D-alanine ligase	363	GO:0005524; GO:0008716; GO:0046872; GO:0071555	cell wall organization [GO:0071555]		ATP binding [GO:0005524]; D-alanine-D-alanine ligase activity [GO:0008716]; metal ion binding [GO:0046872]
EN45_007560	-3.256	-1.238	0.01014	0.02266	A0A167VKS9_PENCH	Leptomycin B resistance protein	1316	GO:0005524; GO:0016021; GO:0140359		integral component of membrane [GO:0016021]	ABC-type transporter activity [GO:0140359]; ATP binding [GO:0005524]
EN45_082140	-3.265	3.556	1.75e-06	3.726e-05	A0A167USU8_PENCH	Integral membrane protein	322	GO:0016021		integral component of membrane [GO:0016021]
EN45_013030	-3.273	3.357	1.679e-07	9.114e-06	A0A167W280_PENCH	Zinc-type alcohol dehydrogenase-like protein	447	GO:0008270; GO:0016491			oxidoreductase activity [GO:0016491]; zinc ion binding [GO:0008270]
EN45_092420	-3.3	0.8356	0.003138	0.00877	A0A162CQP1_PENCH	Boletus edulis lectin	139	GO:0030246			carbohydrate binding [GO:0030246]
EN45_017120	-3.305	3.15	5.435e-07	1.826e-05	A0A167WF26_PENCH	Sugar transporter	541	GO:0008643; GO:0016021; GO:0022857	carbohydrate transport [GO:0008643]	integral component of membrane [GO:0016021]	transmembrane transporter activity [GO:0022857]
EN45_059780	-3.307	4.963	1.985e-08	2.877e-06	A0A167SPG2_PENCH	Sugar transporter	557	GO:0008643; GO:0016021; GO:0022857	carbohydrate transport [GO:0008643]	integral component of membrane [GO:0016021]	transmembrane transporter activity [GO:0022857]
EN45_030480	-3.321	0.7404	0.0001882	0.0009246	A0A167XJA4_PENCH	Homeobox protein	532	GO:0003677; GO:0005634		nucleus [GO:0005634]	DNA binding [GO:0003677]
EN45_036230	-3.328	7.502	1.618e-09	6.858e-07	A0A167Y136_PENCH	Uncharacterized protein	81
EN45_087180	-3.33	2.502	0.0003262	0.001431	A0A167QBX9_PENCH	Putative oxidoreductase	297	GO:0016491			oxidoreductase activity [GO:0016491]
EN45_104920	-3.341	2.996	0.0001863	0.000919	A0A167PJZ6_PENCH	1,3-beta-glucanosyltransferase (EC 2.4.1.-)	515	GO:0005576; GO:0005886; GO:0031225; GO:0042123; GO:0071840; GO:0071852	cellular component organization or biogenesis [GO:0071840]; fungal-type cell wall organization or biogenesis [GO:0071852]	anchored component of membrane [GO:0031225]; extracellular region [GO:0005576]; plasma membrane [GO:0005886]	glucanosyltransferase activity [GO:0042123]
EN45_035300	-3.358	1.248	0.0002871	0.001293	A0A167XYG2_PENCH	Secreted protein	156
[truncated: 43 more rows]

## Sheet: APAP72h vs GLU72h
Gene	logFC	AveExpr	P.Value	adj.P.Val	Entry Name	Protein names	Length	GO IDs	GO Biological process	GO Cellular Compartment	GO Molecular Function
EN45_003730	7.705	-2.117	1.068e-06	0.0002108	A0A167VBM1_PENCH	Mitochondria-eating protein	354
EN45_042840	7.641	-1.366	8.234e-07	0.0001843	A0A167YGL2_PENCH	Adhesive plaque matrix protein	202
EN45_026570	7.58	1.685	2.317e-06	0.0002894	A0A167X7G7_PENCH	Putative transporter	391	GO:0016021; GO:0022857		integral component of membrane [GO:0016021]	transmembrane transporter activity [GO:0022857]
EN45_026560	6.975	1.622	1.95e-06	0.0002771	A0A167X7F9_PENCH	Fumarylacetoacetate hydrolase domain-containing protein 2-like protein	305	GO:0016787			hydrolase activity [GO:0016787]
EN45_097010	6.925	3.562	5.51e-09	2.084e-05	A0A167R3J6_PENCH	Putative MFS-type transporter	533	GO:0016021; GO:0022857		integral component of membrane [GO:0016021]	transmembrane transporter activity [GO:0022857]
EN45_037770	6.614	1.577	5.682e-06	0.0004755	A0A167Y5D6_PENCH	Chanoclavine-I aldehyde reductase	364	GO:0010181; GO:0016491			FMN binding [GO:0010181]; oxidoreductase activity [GO:0016491]
EN45_005810	6.601	-1.368	0.0001077	0.002253	A0A169X5N0_PENCH	INVERT_DEFENSINS domain-containing protein	71	GO:0006952	defense response [GO:0006952]
EN45_045930	5.823	6.452	8.04e-08	4.799e-05	A0A167YQA4_PENCH	Neutral protease 2 (EC 3.4.24.39) (Deuterolysin)	350	GO:0004222; GO:0005576; GO:0006508; GO:0046872	proteolysis [GO:0006508]	extracellular region [GO:0005576]	metal ion binding [GO:0046872]; metalloendopeptidase activity [GO:0004222]
EN45_026410	5.764	1.987	8.619e-07	0.0001882	A0A167X706_PENCH	SirQ	388
EN45_084190	5.721	0.1371	0.006272	0.02659	A0A167UXZ1_PENCH	Ricin B-type lectin domain-containing protein	148
EN45_039790	5.678	3.875	2.428e-06	0.0002917	A0A167YB86_PENCH	Mannan endo-1,6-alpha-mannosidase (EC 3.2.1.101)	472	GO:0008496; GO:0016021; GO:0016052	carbohydrate catabolic process [GO:0016052]	integral component of membrane [GO:0016021]	mannan endo-1,6-alpha-mannosidase activity [GO:0008496]
EN45_055930	5.481	-0.6251	9.588e-06	0.0006234	A0A167SDH4_PENCH	Cyanamide hydratase	244
EN45_003790	5.424	-1.937	1.384e-05	0.0007698	A0A167VBU3_PENCH	DUF1275 domain protein	323	GO:0016021		integral component of membrane [GO:0016021]
EN45_025080	5.352	-2.137	0.0001498	0.002704	A0A167X329_PENCH	HEPN domain-containing protein	139
EN45_055220	5.32	1.852	0.0001295	0.002499	A0A167SAT7_PENCH	Sm domain-containing protein	141
EN45_039060	5.223	2.507	4.998e-08	4.485e-05	A0A167Y9C5_PENCH	Riboflavin transporter	434	GO:0016021; GO:0022857		integral component of membrane [GO:0016021]	transmembrane transporter activity [GO:0022857]
EN45_031750	5.063	6.438	3.12e-08	4.485e-05	A0A161ZKU3_PENCH	Zinc-type alcohol dehydrogenase-like protein	347	GO:0016491			oxidoreductase activity [GO:0016491]
EN45_113290	4.822	1.823	0.000348	0.004317	A0A162BEM7_PENCH	Small secreted protein	97
EN45_093710	4.818	7.018	8.329e-09	2.084e-05	A0A167QUL5_PENCH	DUF1993 domain-containing protein	170
EN45_107450	4.65	-1.816	0.0003263	0.004173	A0A162BDC2_PENCH	DUF1968 domain-containing protein	263
EN45_094770	4.563	9.954	2.197e-06	0.0002894	A0A162C210_PENCH	Bifunctional pinoresinol-lariciresinol reductase	293	GO:0016491			oxidoreductase activity [GO:0016491]
EN45_002170	4.542	2.669	2.679e-06	0.0003036	A0A167V7I3_PENCH	Zinc finger protein	297	GO:0005634		nucleus [GO:0005634]
EN45_045960	4.511	1.227	0.0001141	0.002302	A0A167YQC5_PENCH	Aspergillopepsin-2	269	GO:0004190; GO:0006508	proteolysis [GO:0006508]		aspartic-type endopeptidase activity [GO:0004190]
EN45_077120	4.508	-1.189	0.001128	0.008795	A0A167UBU4_PENCH	Putative nitrilase	241	GO:0006807	nitrogen compound metabolic process [GO:0006807]
EN45_045950	4.439	3.24	5.911e-06	0.0004818	A0A167YQB3_PENCH	Threonylcarbamoyl-AMP synthase (EC 2.7.7.87)	236	GO:0003725			double-stranded RNA binding [GO:0003725]
EN45_005110	4.435	-0.2505	0.002793	0.01542	A0A167VFN3_PENCH	Chitin synthase (EC 2.4.1.16)	889	GO:0004100; GO:0005886; GO:0006031; GO:0016021; GO:0048315; GO:0071555	cell wall organization [GO:0071555]; chitin biosynthetic process [GO:0006031]; conidium formation [GO:0048315]	integral component of membrane [GO:0016021]; plasma membrane [GO:0005886]	chitin synthase activity [GO:0004100]
EN45_099000	4.397	2.605	1.815e-05	0.0008561	A0A167R947_PENCH	Alkaline phosphatase (EC 3.1.3.1)	660	GO:0004035			alkaline phosphatase activity [GO:0004035]
EN45_093720	4.342	-0.7584	0.001543	0.01055	A0A162CQV7_PENCH	AA1-like domain-containing protein	153
EN45_108750	4.33	1.666	0.0008767	0.007446	A0A167PSU5_PENCH	Secreted protein	120
EN45_037070	4.279	-1.08	0.002315	0.01366	A0A167Y3I7_PENCH	Uncharacterized protein	93	GO:0016021		integral component of membrane [GO:0016021]
EN45_031230	4.269	-0.3155	6.822e-05	0.001755	A0A167XLG8_PENCH	Endo-beta-1,4-glucanase D (Endoglucanase D) (EC 3.2.1.4) (Carboxymethylcellulase D) (Cellulase D)	245	GO:0005576; GO:0008810; GO:0030245; GO:0030248	cellulose catabolic process [GO:0030245]	extracellular region [GO:0005576]	cellulase activity [GO:0008810]; cellulose binding [GO:0030248]
EN45_071130	4.26	0.9074	0.0001063	0.002239	A0A167TRC5_PENCH	Ferric reductase transmembrane component	375	GO:0016021; GO:0016491		integral component of membrane [GO:0016021]	oxidoreductase activity [GO:0016491]
EN45_003720	4.251	9.943	0.01145	0.04014	A0A167VBL3_PENCH	Carboxyvinyl-carboxyphosphonate phosphorylmutase	326	GO:0016829			lyase activity [GO:0016829]
EN45_045720	4.245	-0.02341	2.077e-05	0.0009114	A0A167YPU6_PENCH	Tautomerase/MIF	327
EN45_041860	4.239	1.053	3.907e-05	0.001284	A0A167YDY1_PENCH	Uncharacterized protein	175
EN45_114790	4.208	2.112	1.001e-06	0.0002083	A0A167Q5T3_PENCH	Sugar transporter	527	GO:0008643; GO:0016021; GO:0022857	carbohydrate transport [GO:0008643]	integral component of membrane [GO:0016021]	transmembrane transporter activity [GO:0022857]
EN45_059670	4.159	2.044	2.325e-06	0.0002894	A0A167SNW1_PENCH	Putative permease	553	GO:0016021; GO:0022857		integral component of membrane [GO:0016021]	transmembrane transporter activity [GO:0022857]
EN45_056810	4.072	5.223	9.312e-09	2.084e-05	A0A167SFX1_PENCH	Aflatoxin B1 aldehyde reductase member	323	GO:0016491			oxidoreductase activity [GO:0016491]
EN45_039400	4.022	3.123	1.63e-07	7.68e-05	A0A167YA72_PENCH	Putative transporter YgaY	489	GO:0016021; GO:0022857		integral component of membrane [GO:0016021]	transmembrane transporter activity [GO:0022857]
EN45_023730	4.002	5.417	0.0001262	0.002456	A0A167WZ01_PENCH	Hce2 domain-containing protein	114
EN45_024380	3.998	0.558	5.768e-05	0.00165	A0A167X0U7_PENCH	GDSL esterase/lipase	294	GO:0016788			hydrolase activity, acting on ester bonds [GO:0016788]
EN45_064780	3.942	1.219	0.0001213	0.002397	A0A167T5W4_PENCH	Extracellular exo-inulinase inuE	431	GO:0004553; GO:0005975	carbohydrate metabolic process [GO:0005975]		hydrolase activity, hydrolyzing O-glycosyl compounds [GO:0004553]
EN45_080850	3.924	2.118	0.0009582	0.007892	A0A167UPC9_PENCH	Putative transporter	519	GO:0016021; GO:0022857		integral component of membrane [GO:0016021]	transmembrane transporter activity [GO:0022857]
EN45_005290	3.81	4.98	6.512e-08	4.485e-05	A0A169X2V7_PENCH	Extradiol ring-cleavage dioxygenase	369	GO:0006725; GO:0008198; GO:0008270; GO:0016021; GO:0016701; GO:0051213	cellular aromatic compound metabolic process [GO:0006725]	integral component of membrane [GO:0016021]	dioxygenase activity [GO:0051213]; ferrous iron binding [GO:0008198]; oxidoreductase activity, acting on single donors with incorporation of molecular oxygen [GO:0016701]; zinc ion binding [GO:0008270]
EN45_038690	3.776	-1.41	0.002465	0.01423	A0A167Y897_PENCH	Alpha-L-rhamnosidase C	376	GO:0016021		integral component of membrane [GO:0016021]
EN45_112790	3.704	-0.2048	5.919e-05	0.00167	A0A167Q1B3_PENCH	Sphingoid long-chain base transporter	265	GO:0016021		integral component of membrane [GO:0016021]
EN45_029090	3.64	5.333	6.38e-09	2.084e-05	A0A167XF29_PENCH	Phenol 2-monooxygenase	678	GO:0004497; GO:0044550; GO:0071949	secondary metabolite biosynthetic process [GO:0044550]		FAD binding [GO:0071949]; monooxygenase activity [GO:0004497]
EN45_027690	3.626	3.462	4.496e-05	0.001398	A0A167XAS9_PENCH	Putative dipeptidyl-peptidase	772	GO:0006508; GO:0008236; GO:0016021	proteolysis [GO:0006508]	integral component of membrane [GO:0016021]	serine-type peptidase activity [GO:0008236]
EN45_077430	3.617	8.481	0.0001125	0.002284	A0A167UD04_PENCH	Salivary secreted protein	62
EN45_082020	3.578	3.923	1.743e-05	0.0008527	A0A167USG7_PENCH	TACC_C domain-containing protein	858
EN45_075450	3.537	6.217	0.0001719	0.002877	A0A167U5W7_PENCH	Bubble protein	88
EN45_014480	3.536	2.43	0.0007631	0.006791	A0A167W6K9_PENCH	Secreted protein	158
EN45_082030	3.503	2.162	0.0001623	0.002789	A0A167USJ6_PENCH	Putative alpha-ketoglutarate-dependent sulfonate dioxygenase	400	GO:0051213			dioxygenase activity [GO:0051213]
EN45_045830	3.474	1.564	0.0004221	0.00476	A0A167YQ14_PENCH	Adenosine deaminase CECR1-A	590	GO:0019239			deaminase activity [GO:0019239]
EN45_004190	3.444	-1.458	0.0004168	0.004718	A0A167VD05_PENCH	TPR_REGION domain-containing protein	569
EN45_112800	3.432	2.25	0.0008191	0.007119	A0A167Q1B7_PENCH	Ricin B-type lectin domain-containing protein	167
EN45_049290	3.387	-0.227	0.0007549	0.006752	A0A167RT24_PENCH	Uncharacterized protein	211
EN45_115160	3.366	5.714	1.779e-05	0.0008561	A0A167Q6L8_PENCH	Sugar transporter	542	GO:0008643; GO:0016021; GO:0022857	carbohydrate transport [GO:0008643]	integral component of membrane [GO:0016021]	transmembrane transporter activity [GO:0022857]
EN45_072870	3.364	7.052	7.042e-08	4.503e-05	A0A167TX47_PENCH	Glutathione S-transferase omega-1	236	GO:0016740			transferase activity [GO:0016740]
EN45_021350	3.363	4.297	9.912e-08	5.22e-05	A0A167WSB3_PENCH	Beta-mannosidase (EC 3.2.1.25)	636	GO:0004553; GO:0005576; GO:0005975	carbohydrate metabolic process [GO:0005975]	extracellular region [GO:0005576]	hydrolase activity, hydrolyzing O-glycosyl compounds [GO:0004553]
EN45_094760	3.346	3.679	6.061e-08	4.485e-05	A0A167QXD2_PENCH	RING-type domain-containing protein	306	GO:0004842; GO:0046872			metal ion binding [GO:0046872]; ubiquitin-protein transferase activity [GO:0004842]
EN45_012440	3.323	6.528	6.262e-08	4.485e-05	A0A167W0F8_PENCH	ABC transporter G family member	1480	GO:0005524; GO:0005886; GO:0016021; GO:0140359		integral component of membrane [GO:0016021]; plasma membrane [GO:0005886]	ABC-type transporter activity [GO:0140359]; ATP binding [GO:0005524]
EN45_111850	3.307	3.835	2.501e-05	0.001018	A0A167PZN9_PENCH	Chromosome 3 open reading frame 18	155	GO:0016021		integral component of membrane [GO:0016021]
EN45_038680	3.232	0.08209	0.002363	0.01384	A0A167Y885_PENCH	Sterol 3-beta-glucosyltransferase	829	GO:0005975; GO:0008194; GO:0016758; GO:0030259	carbohydrate metabolic process [GO:0005975]; lipid glycosylation [GO:0030259]		hexosyltransferase activity [GO:0016758]; UDP-glycosyltransferase activity [GO:0008194]
EN45_039760	3.215	2.213	0.001413	0.01001	A0A167YB54_PENCH	Integral membrane protein	231	GO:0016021		integral component of membrane [GO:0016021]
EN45_064990	3.181	-1.035	0.01562	0.0496	A0A167T6J6_PENCH	Putative transporter	269	GO:0016021; GO:0022857		integral component of membrane [GO:0016021]	transmembrane transporter activity [GO:0022857]
EN45_057250	3.179	1.387	0.0008172	0.007117	A0A167SH91_PENCH	Asparaginase (EC 3.5.1.1)	379	GO:0004067; GO:0006530; GO:0110165	asparagine catabolic process [GO:0006530]	cellular anatomical entity [GO:0110165]	asparaginase activity [GO:0004067]
EN45_044590	3.159	-0.1595	0.0003951	0.004594	A0A167YLD2_PENCH	Uncharacterized protein	260
EN45_053190	3.139	1.49	0.0003805	0.004512	A0A167S4J8_PENCH	Putative urea carboxylase	1247	GO:0005524; GO:0016787; GO:0016874; GO:0046872			ATP binding [GO:0005524]; hydrolase activity [GO:0016787]; ligase activity [GO:0016874]; metal ion binding [GO:0046872]
EN45_003690	3.135	6.399	0.000228	0.003416	A0A167VBH5_PENCH	Aldehyde dehydrogenase	381	GO:0016620			oxidoreductase activity, acting on the aldehyde or oxo group of donors, NAD or NADP as acceptor [GO:0016620]
EN45_046660	3.111	2.044	9.678e-06	0.0006234	A0A167YSG8_PENCH	Choline monooxygenase, chloroplastic (EC 1.14.15.7)	413	GO:0005506; GO:0019133; GO:0019285; GO:0051537	glycine betaine biosynthetic process from choline [GO:0019285]		2 iron, 2 sulfur cluster binding [GO:0051537]; choline monooxygenase activity [GO:0019133]; iron ion binding [GO:0005506]
EN45_003700	3.092	7.192	0.001136	0.008803	A0A167VBI7_PENCH	DUF1275 domain protein	249	GO:0016021		integral component of membrane [GO:0016021]
EN45_008300	3.032	5.547	1.59e-08	2.846e-05	A0A161ZFF4_PENCH	Antigenic thaumatin-like protein	176
EN45_080500	3.032	1.89	0.001055	0.008436	A0A167UN76_PENCH	4-hydroxy-tetrahydrodipicolinate synthase	310	GO:0016829			lyase activity [GO:0016829]
EN45_030230	3.031	-0.8859	0.0005632	0.005679	A0A167XII8_PENCH	Putative methyltransferase	309	GO:0008168; GO:0032259	methylation [GO:0032259]		methyltransferase activity [GO:0008168]
EN45_049160	3.028	4.019	4.427e-07	0.0001367	A0A167RSP5_PENCH	Uncharacterized protein	329	GO:0016021		integral component of membrane [GO:0016021]
EN45_073760	3.01	0.1447	7.603e-05	0.00184	A0A167U0D2_PENCH	Secreted protein	387
EN45_046760	2.987	2.303	1.736e-05	0.0008527	A0A167YSQ7_PENCH	Zn(2)-C6 fungal-type domain-containing protein	498	GO:0000981; GO:0003677; GO:0005634; GO:0008270		nucleus [GO:0005634]	DNA binding [GO:0003677]; DNA-binding transcription factor activity, RNA polymerase II-specific [GO:0000981]; zinc ion binding [GO:0008270]
EN45_108730	2.965	-0.2247	0.0005745	0.005721	A0A167PST2_PENCH	Chitinase	203
EN45_025270	2.958	2.102	0.0003219	0.004159	A0A167X3J0_PENCH	Movement protein	344
EN45_023010	2.933	1.722	1.786e-05	0.0008561	A0A167WWY4_PENCH	DUF4158 domain-containing protein	138
EN45_085200	2.932	7.471	0.002128	0.01296	A0A167V100_PENCH	Hydrophobin	140	GO:0005199; GO:0005576; GO:0009277		extracellular region [GO:0005576]; fungal-type cell wall [GO:0009277]	structural constituent of cell wall [GO:0005199]
EN45_058950	2.931	8.562	4.679e-06	0.0004107	A0A167SLX7_PENCH	Dopa 4,5-dioxygenase	173
EN45_055250	2.923	0.2107	0.0005279	0.005389	A0A167SAX3_PENCH	Integral membrane protein	254	GO:0016021		integral component of membrane [GO:0016021]
EN45_050080	2.918	0.4351	3.654e-05	0.001258	A0A167RV47_PENCH	ANK_REP_REGION domain-containing protein	580
EN45_045940	2.905	6.134	2.989e-05	0.001113	A0A161ZNU8_PENCH	Putative secreted protein	158
EN45_012430	2.891	1.951	2.135e-05	0.0009189	A0A167W0E9_PENCH	Metal homeostasis factor	79	GO:0046872			metal ion binding [GO:0046872]
EN45_018120	2.89	3.556	0.001119	0.008741	A0A167WHY0_PENCH	TNT domain-containing protein	244	GO:0061810			NAD glycohydrolase activity [GO:0061810]
EN45_097890	2.871	-0.641	0.0005601	0.005654	A0A162CRU1_PENCH	Beta-lactamase-like protein	545
EN45_099200	2.867	-1.138	0.004922	0.02255	A0A167R9P9_PENCH	Helo_like_N domain-containing protein	129
EN45_051510	2.854	5.674	4.922e-06	0.0004237	A0A167RZL7_PENCH	Secreted protein	111
EN45_084920	2.831	0.3757	0.0002372	0.003487	A0A167V0C2_PENCH	RusA family crossover junction endodeoxyribonuclease	147
EN45_092840	2.825	6.328	1.805e-06	0.0002607	A0A167QS73_PENCH	Maleylacetoacetate isomerase	226	GO:0005737; GO:0009072; GO:0016853	aromatic amino acid family metabolic process [GO:0009072]	cytoplasm [GO:0005737]	isomerase activity [GO:0016853]
EN45_033660	2.819	3.666	3.875e-07	0.0001239	A0A167XTQ3_PENCH	Putative transporter	513	GO:0016021; GO:0022857		integral component of membrane [GO:0016021]	transmembrane transporter activity [GO:0022857]
EN45_022980	2.809	1.343	2.279e-05	0.0009581	A0A167WWU4_PENCH	Major allergen Asp f	289	GO:0008237			metallopeptidase activity [GO:0008237]
EN45_076630	2.794	6.764	0.001109	0.008703	A0A167UA36_PENCH	GPI anchored protein	232
EN45_105140	2.779	0.8445	0.0001007	0.002194	A0A167PKI6_PENCH	Protein ecm33	448
EN45_068430	2.77	2.408	8.887e-06	0.0005938	A0A167TH93_PENCH	DUF3074 domain-containing protein	338
EN45_097470	2.701	1.895	0.001862	0.01197	A0A162CRQ8_PENCH	Zinc ribbon domain-containing protein	203	GO:0016021		integral component of membrane [GO:0016021]
EN45_069590	2.68	7.724	1.47e-05	0.0008074	A0A167TKX5_PENCH	Putative quinone oxidoreductase	383	GO:0008270; GO:0016491			oxidoreductase activity [GO:0016491]; zinc ion binding [GO:0008270]
EN45_079980	2.66	1.871	2.076e-05	0.0009114	A0A167ULQ4_PENCH	SMI1_KNR4 domain-containing protein	516
EN45_075660	2.652	0.5433	0.0001572	0.002787	A0A167U6M8_PENCH	Mitochondrial import inner membrane translocase subunit TIM22	160	GO:0016021		integral component of membrane [GO:0016021]
EN45_039090	2.65	4.15	0.0001593	0.002789	A0A167Y9E8_PENCH	Similar to	455
EN45_031110	2.604	2.094	0.0002464	0.003553	A0A167XL51_PENCH	DUF924-domain-containing protein	255
EN45_006410	2.601	2.662	0.0002855	0.003938	A0A167VGK1_PENCH	CFEM domain-containing protein	134
EN45_053170	2.584	-0.6419	0.002786	0.01542	A0A167S4J2_PENCH	Lactam utilization protein	255	GO:0005975	carbohydrate metabolic process [GO:0005975]
EN45_063720	2.576	0.1256	0.001912	0.01215	A0A167T2C2_PENCH	Clr5 domain-containing protein	175
EN45_025680	2.575	2.827	0.0001867	0.003028	A0A167X4Q6_PENCH	Spc7 domain-containing protein	544
EN45_106650	2.569	2.988	0.004661	0.02175	A0A167PNW3_PENCH	Secreted protein	179
EN45_027540	2.551	0.05713	0.0008943	0.007537	A0A167XAB3_PENCH	Putative oxidoreductase	267
EN45_093690	2.546	0.2876	0.000313	0.004111	A0A167QUK5_PENCH	Putative peroxisomal-coenzyme A synthetase	1677	GO:0004475; GO:0016021; GO:0031177		integral component of membrane [GO:0016021]	mannose-1-phosphate guanylyltransferase activity [GO:0004475]; phosphopantetheine binding [GO:0031177]
EN45_104850	2.539	0.003014	0.000308	0.00411	A0A162CLZ1_PENCH	NADH oxidase	444	GO:0010181; GO:0016491			FMN binding [GO:0010181]; oxidoreductase activity [GO:0016491]
EN45_021680	2.525	-0.2457	0.001354	0.009789	A0A167WTB8_PENCH	Putative oxidoreductase	374	GO:0016491			oxidoreductase activity [GO:0016491]
EN45_021730	2.523	5.625	9.986e-07	0.0002083	A0A167WTF4_PENCH	AB hydrolase-1 domain-containing protein	252
EN45_099190	2.518	-0.7497	0.00148	0.0103	A0A167R9P1_PENCH	Ankyrin-2	295
EN45_016480	2.514	5.521	1.264e-05	0.0007208	A0A167WD23_PENCH	Transmembrane protein	234	GO:0016021		integral component of membrane [GO:0016021]
EN45_056450	2.511	7.783	1.233e-05	0.0007121	A0A167SEY8_PENCH	Superoxide dismutase [Cu-Zn] (EC 1.15.1.1)	152	GO:0004784; GO:0046872			metal ion binding [GO:0046872]; superoxide dismutase activity [GO:0004784]
[truncated: 1,007 more rows]

## Sheet: GLU-APAP24h vs GLU24h
Gene	logFC	AveExpr	P.Value	adj.P.Val	Entry Name	Protein names	Length	GO IDs	GO Biological process	GO Cellular Compartment	GO Molecular Function
[truncated: 339 more rows]

[truncated: 2 more sheets: GLU-APAP48h vs GLU48h, GLU-APAP72h vs GLU72h]
